# Supplementary material for: Transcriptome profiling of transcription factors in Ganoderma lucidum in response to methyl jasmonate
Source: Frontiers journal article supplement (doi:10.3389/fmicb.2022.1052377), 2022-11-24
Supplement: Table_2.XLS [file Table_2.XLS]

## Sheet: 200 μΜ group
Supplementary table 2. Differentially expressed genes in G. lucidum in response to MeJA induction (200 μΜ group).
GeneID	Means-CK	Means-200	log2FC(200/Control)	Up-Down-Regulation(200/CK)	Probability	NR-ID	NR-Annot	KEGG-ID	KEGG-Annot	GO-BP	GO-CC	GO-MF	NR-ID	NR-Annot	KEGG-ID	KEGG-Annot	GO-BP	GO-CC	GO-MF
GL15002-G	8.15667	49.0533	2.5883	Up	0.86752	--	--	--	--	--	--	--	--	--	--	--	--	--	--
GL15008-G	9.55	42.0833	2.13968	Up	0.812958	--	--	--	--	--	--	--	--	--	--	--	--	--	--
GL15023-G	7.23667	36.0433	2.31634	Up	0.814796	--	--	--	--	--	--	--	--	--	--	--	--	--	--
GL15119-G	40.5633	193.433	2.25359	Up	0.904096	gi|691786332|emb|CDO76773.1|	protein BN946_scf184978.g2 [Trametes cinnabarina]	--	--	--	--	--	gi|691786332|emb|CDO76773.1|	protein BN946_scf184978.g2 [Trametes cinnabarina]	--	--	--	--	--
GL15124-G	187.54	22.98	-3.02875	Down	0.951241	gi|597986711|ref|XP_007364868.1|	protein [Dichomitus squalens LYAD-421 SS1] >gi|395329771|gb|EJF62156.1| WSC-domain-containing protein [Dichomitus squalens LYAD-421 SS1]	maj:MAA_04364	WSC domain-containing protein; K20929 glyoxal/methylglyoxal oxidase [EC:1.2.3.15]	--	--	--	gi|597986711|ref|XP_007364868.1|	protein [Dichomitus squalens LYAD-421 SS1] >gi|395329771|gb|EJF62156.1| WSC-domain-containing protein [Dichomitus squalens LYAD-421 SS1]	maj:MAA_04364	WSC domain-containing protein; K20929 glyoxal/methylglyoxal oxidase [EC:1.2.3.15]	--	--	--
GL15131-G	7.11667	40.4233	2.50591	Up	0.84255	gi|598006617|ref|XP_007369983.1|	protein DICSQDRAFT_183303 [Dichomitus squalens LYAD-421 SS1] >gi|395324821|gb|EJF57254.1| hypothetical protein DICSQDRAFT_183303 [Dichomitus squalens LYAD-421 SS1]	--	--	--	--	--	gi|598006617|ref|XP_007369983.1|	protein DICSQDRAFT_183303 [Dichomitus squalens LYAD-421 SS1] >gi|395324821|gb|EJF57254.1| hypothetical protein DICSQDRAFT_183303 [Dichomitus squalens LYAD-421 SS1]	--	--	--	--	--
GL15151-G	10.9167	46.19	2.08105	Up	0.815715	gi|242213167|ref|XP_002472413.1|	protein [Postia placenta Mad-698-R] >gi|220728489|gb|EED82382.1| predicted protein [Postia placenta Mad-698-R]	ppl:POSPLDRAFT_88603	hypothetical protein; K12191 charged multivesicular body protein 2A	GO:0007034 vacuolar transport	--	GO:0005622 intracellular	gi|242213167|ref|XP_002472413.1|	protein [Postia placenta Mad-698-R] >gi|220728489|gb|EED82382.1| predicted protein [Postia placenta Mad-698-R]	ppl:POSPLDRAFT_88603	hypothetical protein; K12191 charged multivesicular body protein 2A	GO:0007034 vacuolar transport	--	GO:0005622 intracellular
GL15172-G	15.0133	82.1967	2.45284	Up	0.892819	gi|597986109|ref|XP_007364710.1|	protein DICSQDRAFT_160966 [Dichomitus squalens LYAD-421 SS1] >gi|395330253|gb|EJF62637.1| hypothetical protein DICSQDRAFT_160966 [Dichomitus squalens LYAD-421 SS1]	dsq:DICSQDRAFT_160966	hypothetical protein; K10643 CCR4-NOT transcription complex subunit 4 [EC:2.3.2.27]	--	GO:0005488 binding	--	gi|597986109|ref|XP_007364710.1|	protein DICSQDRAFT_160966 [Dichomitus squalens LYAD-421 SS1] >gi|395330253|gb|EJF62637.1| hypothetical protein DICSQDRAFT_160966 [Dichomitus squalens LYAD-421 SS1]	dsq:DICSQDRAFT_160966	hypothetical protein; K10643 CCR4-NOT transcription complex subunit 4 [EC:2.3.2.27]	--	GO:0005488 binding	--
GL15207-G	4.34	29.9667	2.78759	Up	0.825903	gi|597986227|ref|XP_007364742.1|	protein DICSQDRAFT_135644 [Dichomitus squalens LYAD-421 SS1] >gi|395330285|gb|EJF62669.1| hypothetical protein DICSQDRAFT_135644 [Dichomitus squalens LYAD-421 SS1]	--	--	--	--	--	gi|597986227|ref|XP_007364742.1|	protein DICSQDRAFT_135644 [Dichomitus squalens LYAD-421 SS1] >gi|395330285|gb|EJF62669.1| hypothetical protein DICSQDRAFT_135644 [Dichomitus squalens LYAD-421 SS1]	--	--	--	--	--
GL15216-G	6.00333	46.3533	2.94884	Up	0.881423	gi|598003829|ref|XP_007369330.1|	protein DICSQDRAFT_91509 [Dichomitus squalens LYAD-421 SS1] >gi|395325534|gb|EJF57955.1| hypothetical protein DICSQDRAFT_91509 [Dichomitus squalens LYAD-421 SS1]	--	--	--	--	--	gi|598003829|ref|XP_007369330.1|	protein DICSQDRAFT_91509 [Dichomitus squalens LYAD-421 SS1] >gi|395325534|gb|EJF57955.1| hypothetical protein DICSQDRAFT_91509 [Dichomitus squalens LYAD-421 SS1]	--	--	--	--	--
GL15219-G	5.99333	40.8733	2.76973	Up	0.860654	gi|598005913|ref|XP_007369897.1|	protein [Dichomitus squalens LYAD-421 SS1] >gi|395324962|gb|EJF57393.1| LmbE-like protein [Dichomitus squalens LYAD-421 SS1]	dsq:DICSQDRAFT_111859	LmbE-like protein; K03434 N-acetylglucosaminylphosphatidylinositol deacetylase [EC:3.5.1.89]	--	--	--	gi|598005913|ref|XP_007369897.1|	protein [Dichomitus squalens LYAD-421 SS1] >gi|395324962|gb|EJF57393.1| LmbE-like protein [Dichomitus squalens LYAD-421 SS1]	dsq:DICSQDRAFT_111859	LmbE-like protein; K03434 N-acetylglucosaminylphosphatidylinositol deacetylase [EC:3.5.1.89]	--	--	--
GL15226-G	14.2333	55.49	1.96295	Up	0.814743	gi|598005827|ref|XP_007369871.1|	protein DICSQDRAFT_157394 [Dichomitus squalens LYAD-421 SS1] >gi|395324936|gb|EJF57367.1| hypothetical protein DICSQDRAFT_157394 [Dichomitus squalens LYAD-421 SS1]	--	--	--	--	--	gi|598005827|ref|XP_007369871.1|	protein DICSQDRAFT_157394 [Dichomitus squalens LYAD-421 SS1] >gi|395324936|gb|EJF57367.1| hypothetical protein DICSQDRAFT_157394 [Dichomitus squalens LYAD-421 SS1]	--	--	--	--	--
GL15227-G	1223.05	335.33	-1.86683	Down	0.871997	gi|598005803|ref|XP_007369865.1|	protein DICSQDRAFT_149819 [Dichomitus squalens LYAD-421 SS1] >gi|395324930|gb|EJF57361.1| hypothetical protein DICSQDRAFT_149819 [Dichomitus squalens LYAD-421 SS1]	--	--	--	--	--	gi|598005803|ref|XP_007369865.1|	protein DICSQDRAFT_149819 [Dichomitus squalens LYAD-421 SS1] >gi|395324930|gb|EJF57361.1| hypothetical protein DICSQDRAFT_149819 [Dichomitus squalens LYAD-421 SS1]	--	--	--	--	--
GL15240-G	14.4133	64.5567	2.16316	Up	0.851241	gi|598004205|ref|XP_007369428.1|	protein DICSQDRAFT_68511 [Dichomitus squalens LYAD-421 SS1] >gi|395325377|gb|EJF57800.1| hypothetical protein DICSQDRAFT_68511 [Dichomitus squalens LYAD-421 SS1]	dsq:DICSQDRAFT_68511	hypothetical protein; K13106 pre-mRNA-splicing factor CWC26	--	--	--	gi|598004205|ref|XP_007369428.1|	protein DICSQDRAFT_68511 [Dichomitus squalens LYAD-421 SS1] >gi|395325377|gb|EJF57800.1| hypothetical protein DICSQDRAFT_68511 [Dichomitus squalens LYAD-421 SS1]	dsq:DICSQDRAFT_68511	hypothetical protein; K13106 pre-mRNA-splicing factor CWC26	--	--	--
GL15274-G	20.6767	75.0433	1.85972	Up	0.820362	gi|597988825|ref|XP_007365404.1|	protein DICSQDRAFT_180443 [Dichomitus squalens LYAD-421 SS1] >gi|395329316|gb|EJF61703.1| hypothetical protein DICSQDRAFT_180443 [Dichomitus squalens LYAD-421 SS1]	--	--	--	--	--	gi|597988825|ref|XP_007365404.1|	protein DICSQDRAFT_180443 [Dichomitus squalens LYAD-421 SS1] >gi|395329316|gb|EJF61703.1| hypothetical protein DICSQDRAFT_180443 [Dichomitus squalens LYAD-421 SS1]	--	--	--	--	--
GL15288-G	14.4567	78.5	2.44096	Up	0.889655	gi|598009483|ref|XP_007370792.1|	protein DICSQDRAFT_141254 [Dichomitus squalens LYAD-421 SS1] >gi|395324037|gb|EJF56486.1| hypothetical protein DICSQDRAFT_141254 [Dichomitus squalens LYAD-421 SS1]	--	--	--	--	GO:0016020 membrane	gi|598009483|ref|XP_007370792.1|	protein DICSQDRAFT_141254 [Dichomitus squalens LYAD-421 SS1] >gi|395324037|gb|EJF56486.1| hypothetical protein DICSQDRAFT_141254 [Dichomitus squalens LYAD-421 SS1]	--	--	--	--	GO:0016020 membrane
GL15366-G	138.103	459.41	1.73403	Up	0.842878	gi|636619711|ref|XP_008040990.1|	protein TRAVEDRAFT_30616 [Trametes versicolor FP-101664 SS1] >gi|392562841|gb|EIW56021.1| hypothetical protein TRAVEDRAFT_30616 [Trametes versicolor FP-101664 SS1]	--	--	--	--	--	gi|636619711|ref|XP_008040990.1|	protein TRAVEDRAFT_30616 [Trametes versicolor FP-101664 SS1] >gi|392562841|gb|EIW56021.1| hypothetical protein TRAVEDRAFT_30616 [Trametes versicolor FP-101664 SS1]	--	--	--	--	--
GL15367-G	23.0067	283.44	3.62292	Up	0.97243	gi|597999885|ref|XP_007368280.1|	[Dichomitus squalens LYAD-421 SS1] >gi|395326569|gb|EJF58977.1| fimbrin [Dichomitus squalens LYAD-421 SS1]	dsq:DICSQDRAFT_148764	fimbrin; K17275 plastin-1	--	GO:0003779 actin binding | GO:0005509 calcium ion binding	--	gi|597999885|ref|XP_007368280.1|	[Dichomitus squalens LYAD-421 SS1] >gi|395326569|gb|EJF58977.1| fimbrin [Dichomitus squalens LYAD-421 SS1]	dsq:DICSQDRAFT_148764	fimbrin; K17275 plastin-1	--	GO:0003779 actin binding | GO:0005509 calcium ion binding	--
GL15410-G	64.1567	15.79	-2.02259	Down	0.834581	gi|691796371|emb|CDO68972.1|	protein BN946_scf184777.g2 [Trametes cinnabarina]	ppl:POSPLDRAFT_104820	hypothetical protein; K14315 nucleoporin NDC1	--	--	--	gi|691796371|emb|CDO68972.1|	protein BN946_scf184777.g2 [Trametes cinnabarina]	ppl:POSPLDRAFT_104820	hypothetical protein; K14315 nucleoporin NDC1	--	--	--
GL15424-G	47.0967	161.927	1.78164	Up	0.837114	gi|597989807|ref|XP_007365665.1|	protein DICSQDRAFT_169986 [Dichomitus squalens LYAD-421 SS1] >gi|395329182|gb|EJF61570.1| hypothetical protein DICSQDRAFT_169986 [Dichomitus squalens LYAD-421 SS1]	dsq:DICSQDRAFT_169986	hypothetical protein; K18726 FAS-associated factor 2	--	--	GO:0016021 integral component of membrane	gi|597989807|ref|XP_007365665.1|	protein DICSQDRAFT_169986 [Dichomitus squalens LYAD-421 SS1] >gi|395329182|gb|EJF61570.1| hypothetical protein DICSQDRAFT_169986 [Dichomitus squalens LYAD-421 SS1]	dsq:DICSQDRAFT_169986	hypothetical protein; K18726 FAS-associated factor 2	--	--	GO:0016021 integral component of membrane
GL15438-G	7.65667	59.8233	2.96592	Up	0.902875	gi|597989825|ref|XP_007365670.1|	protein DICSQDRAFT_105720 [Dichomitus squalens LYAD-421 SS1] >gi|395329187|gb|EJF61575.1| hypothetical protein DICSQDRAFT_105720 [Dichomitus squalens LYAD-421 SS1]	--	--	--	--	--	gi|597989825|ref|XP_007365670.1|	protein DICSQDRAFT_105720 [Dichomitus squalens LYAD-421 SS1] >gi|395329187|gb|EJF61575.1| hypothetical protein DICSQDRAFT_105720 [Dichomitus squalens LYAD-421 SS1]	--	--	--	--	--
GL15465-G	26.71	99.6167	1.89901	Up	0.840029	gi|636618731|ref|XP_008040500.1|	protein TRAVEDRAFT_170373 [Trametes versicolor FP-101664 SS1] >gi|392563277|gb|EIW56456.1| hypothetical protein TRAVEDRAFT_170373 [Trametes versicolor FP-101664 SS1]	--	--	--	--	--	gi|636618731|ref|XP_008040500.1|	protein TRAVEDRAFT_170373 [Trametes versicolor FP-101664 SS1] >gi|392563277|gb|EIW56456.1| hypothetical protein TRAVEDRAFT_170373 [Trametes versicolor FP-101664 SS1]	--	--	--	--	--
GL15468-G	44.4167	306.703	2.78767	Up	0.948287	gi|597995447|ref|XP_007367129.1|	protein DICSQDRAFT_88328 [Dichomitus squalens LYAD-421 SS1] >gi|395327778|gb|EJF60175.1| hypothetical protein DICSQDRAFT_88328 [Dichomitus squalens LYAD-421 SS1]	bor:COCMIDRAFT_40123	glycoside hydrolase family 16 protein; K00767 nicotinate-nucleotide pyrophosphorylase (carboxylating) [EC:2.4.2.19]	GO:0005975 carbohydrate metabolic process	GO:0004553 hydrolase activity, hydrolyzing O-glycosyl compounds	GO:0016020 membrane	gi|597995447|ref|XP_007367129.1|	protein DICSQDRAFT_88328 [Dichomitus squalens LYAD-421 SS1] >gi|395327778|gb|EJF60175.1| hypothetical protein DICSQDRAFT_88328 [Dichomitus squalens LYAD-421 SS1]	bor:COCMIDRAFT_40123	glycoside hydrolase family 16 protein; K00767 nicotinate-nucleotide pyrophosphorylase (carboxylating) [EC:2.4.2.19]	GO:0005975 carbohydrate metabolic process	GO:0004553 hydrolase activity, hydrolyzing O-glycosyl compounds	GO:0016020 membrane
GL15485-G	10.5667	48.7	2.2044	Up	0.834016	gi|636617797|ref|XP_008040033.1|	protein TRAVEDRAFT_21791 [Trametes versicolor FP-101664 SS1] >gi|392563550|gb|EIW56729.1| hypothetical protein TRAVEDRAFT_21791 [Trametes versicolor FP-101664 SS1]	--	--	--	--	--	gi|636617797|ref|XP_008040033.1|	protein TRAVEDRAFT_21791 [Trametes versicolor FP-101664 SS1] >gi|392563550|gb|EIW56729.1| hypothetical protein TRAVEDRAFT_21791 [Trametes versicolor FP-101664 SS1]	--	--	--	--	--
GL15501-G	7.33667	40.06	2.44897	Up	0.837246	gi|597996099|ref|XP_007367298.1|	protein DICSQDRAFT_181628 [Dichomitus squalens LYAD-421 SS1] >gi|395327436|gb|EJF59835.1| hypothetical protein DICSQDRAFT_181628 [Dichomitus squalens LYAD-421 SS1]	--	--	--	--	--	gi|597996099|ref|XP_007367298.1|	protein DICSQDRAFT_181628 [Dichomitus squalens LYAD-421 SS1] >gi|395327436|gb|EJF59835.1| hypothetical protein DICSQDRAFT_181628 [Dichomitus squalens LYAD-421 SS1]	--	--	--	--	--
GL15605-G	9.34	62.7367	2.74781	Up	0.896101	gi|598007821|ref|XP_007370405.1|	P450 [Dichomitus squalens LYAD-421 SS1] >gi|395324373|gb|EJF56814.1| cytochrome P450 [Dichomitus squalens LYAD-421 SS1]	nfi:NFIA_009830	cytochrome P450 monooxygenase, putative; K21292 ent-kaurene oxidase [EC:1.14.13.78]	GO:0055114 oxidation-reduction process	GO:0020037 heme binding | GO:0016705 oxidoreductase activity, acting on paired donors, with incorporation or reduction of molecular oxygen | GO:0004497 monooxygenase activity | GO:0005506 iron ion binding	GO:0016021 integral component of membrane	gi|598007821|ref|XP_007370405.1|	P450 [Dichomitus squalens LYAD-421 SS1] >gi|395324373|gb|EJF56814.1| cytochrome P450 [Dichomitus squalens LYAD-421 SS1]	nfi:NFIA_009830	cytochrome P450 monooxygenase, putative; K21292 ent-kaurene oxidase [EC:1.14.13.78]	GO:0055114 oxidation-reduction process	GO:0020037 heme binding | GO:0016705 oxidoreductase activity, acting on paired donors, with incorporation or reduction of molecular oxygen | GO:0004497 monooxygenase activity | GO:0005506 iron ion binding	GO:0016021 integral component of membrane
GL15613-G	17.68	122.663	2.79451	Up	0.931207	gi|598007887|ref|XP_007370438.1|	protein DICSQDRAFT_129861 [Dichomitus squalens LYAD-421 SS1] >gi|395324406|gb|EJF56847.1| hypothetical protein DICSQDRAFT_129861 [Dichomitus squalens LYAD-421 SS1]	pgr:PGTG_18715	hypothetical protein; K03260 translation initiation factor 4G	--	--	--	gi|598007887|ref|XP_007370438.1|	protein DICSQDRAFT_129861 [Dichomitus squalens LYAD-421 SS1] >gi|395324406|gb|EJF56847.1| hypothetical protein DICSQDRAFT_129861 [Dichomitus squalens LYAD-421 SS1]	pgr:PGTG_18715	hypothetical protein; K03260 translation initiation factor 4G	--	--	--
GL15657-G	34.1367	134.673	1.98007	Up	0.863949	gi|597980391|ref|XP_007363235.1|	protein DICSQDRAFT_178846 [Dichomitus squalens LYAD-421 SS1] >gi|395332044|gb|EJF64424.1| hypothetical protein DICSQDRAFT_178846 [Dichomitus squalens LYAD-421 SS1]	ppl:POSPLDRAFT_93794	hypothetical protein; K17263 cullin-associated NEDD8-dissociated protein 1	--	--	--	gi|597980391|ref|XP_007363235.1|	protein DICSQDRAFT_178846 [Dichomitus squalens LYAD-421 SS1] >gi|395332044|gb|EJF64424.1| hypothetical protein DICSQDRAFT_178846 [Dichomitus squalens LYAD-421 SS1]	ppl:POSPLDRAFT_93794	hypothetical protein; K17263 cullin-associated NEDD8-dissociated protein 1	--	--	--
GL15678-G	40.43	157.74	1.96405	Up	0.865249	gi|597979969|ref|XP_007363131.1|	protein DICSQDRAFT_134004 [Dichomitus squalens LYAD-421 SS1] >gi|395331940|gb|EJF64320.1| hypothetical protein DICSQDRAFT_134004 [Dichomitus squalens LYAD-421 SS1]	--	--	--	--	--	gi|597979969|ref|XP_007363131.1|	protein DICSQDRAFT_134004 [Dichomitus squalens LYAD-421 SS1] >gi|395331940|gb|EJF64320.1| hypothetical protein DICSQDRAFT_134004 [Dichomitus squalens LYAD-421 SS1]	--	--	--	--	--
GL15679-G	34.8233	370.377	3.41087	Up	0.971445	gi|597979961|ref|XP_007363129.1|	protein DICSQDRAFT_178784 [Dichomitus squalens LYAD-421 SS1] >gi|395331938|gb|EJF64318.1| hypothetical protein DICSQDRAFT_178784 [Dichomitus squalens LYAD-421 SS1]	--	--	--	--	--	gi|597979961|ref|XP_007363129.1|	protein DICSQDRAFT_178784 [Dichomitus squalens LYAD-421 SS1] >gi|395331938|gb|EJF64318.1| hypothetical protein DICSQDRAFT_178784 [Dichomitus squalens LYAD-421 SS1]	--	--	--	--	--
GL15681-G	7.40333	95.7933	3.69368	Up	0.949665	gi|597980307|ref|XP_007363215.1|	protein DICSQDRAFT_178832 [Dichomitus squalens LYAD-421 SS1] >gi|395332024|gb|EJF64404.1| hypothetical protein DICSQDRAFT_178832 [Dichomitus squalens LYAD-421 SS1]	--	--	--	--	--	gi|597980307|ref|XP_007363215.1|	protein DICSQDRAFT_178832 [Dichomitus squalens LYAD-421 SS1] >gi|395332024|gb|EJF64404.1| hypothetical protein DICSQDRAFT_178832 [Dichomitus squalens LYAD-421 SS1]	--	--	--	--	--
GL15684-G	7.25333	40.2067	2.47072	Up	0.83953	gi|597979885|ref|XP_007363109.1|	protein DICSQDRAFT_81520 [Dichomitus squalens LYAD-421 SS1] >gi|395331918|gb|EJF64298.1| hypothetical protein DICSQDRAFT_81520 [Dichomitus squalens LYAD-421 SS1]	--	--	--	--	--	gi|597979885|ref|XP_007363109.1|	protein DICSQDRAFT_81520 [Dichomitus squalens LYAD-421 SS1] >gi|395331918|gb|EJF64298.1| hypothetical protein DICSQDRAFT_81520 [Dichomitus squalens LYAD-421 SS1]	--	--	--	--	--
GL15685-G	27.2367	97.06	1.83333	Up	0.827373	gi|691787056|emb|CDO76290.1|	protein BN946_scf184917.g6 [Trametes cinnabarina]	dsq:DICSQDRAFT_144964	glutaredoxin; K07390 monothiol glutaredoxin	GO:0045454 cell redox homeostasis | GO:0055114 oxidation-reduction process	GO:0009055 electron carrier activity | GO:0015035 protein disulfide oxidoreductase activity	GO:0005623 cell	gi|691787056|emb|CDO76290.1|	protein BN946_scf184917.g6 [Trametes cinnabarina]	dsq:DICSQDRAFT_144964	glutaredoxin; K07390 monothiol glutaredoxin	GO:0045454 cell redox homeostasis | GO:0055114 oxidation-reduction process	GO:0009055 electron carrier activity | GO:0015035 protein disulfide oxidoreductase activity	GO:0005623 cell
GL15700-G	46.0967	499.793	3.4386	Up	0.97436	gi|636614491|ref|XP_008038380.1|	protein TRAVEDRAFT_47803 [Trametes versicolor FP-101664 SS1] >gi|392565484|gb|EIW58661.1| hypothetical protein TRAVEDRAFT_47803 [Trametes versicolor FP-101664 SS1]	--	--	--	--	--	gi|636614491|ref|XP_008038380.1|	protein TRAVEDRAFT_47803 [Trametes versicolor FP-101664 SS1] >gi|392565484|gb|EIW58661.1| hypothetical protein TRAVEDRAFT_47803 [Trametes versicolor FP-101664 SS1]	--	--	--	--	--
GL15701-G	6.46667	36.78	2.50783	Up	0.832309	gi|636615505|ref|XP_008038887.1|	protein TRAVEDRAFT_123610 [Trametes versicolor FP-101664 SS1] >gi|392565555|gb|EIW58732.1| hypothetical protein TRAVEDRAFT_123610 [Trametes versicolor FP-101664 SS1]	--	--	--	--	--	gi|636615505|ref|XP_008038887.1|	protein TRAVEDRAFT_123610 [Trametes versicolor FP-101664 SS1] >gi|392565555|gb|EIW58732.1| hypothetical protein TRAVEDRAFT_123610 [Trametes versicolor FP-101664 SS1]	--	--	--	--	--
GL15743-G	6.53	44.5	2.76865	Up	0.869397	gi|597979271|ref|XP_007362953.1|	repeat-like protein [Dichomitus squalens LYAD-421 SS1] >gi|395331762|gb|EJF64142.1| WD40 repeat-like protein [Dichomitus squalens LYAD-421 SS1]	dsq:DICSQDRAFT_144831	WD40 repeat-like protein; K10415 dynein intermediate chain, cytosolic	--	--	--	gi|597979271|ref|XP_007362953.1|	repeat-like protein [Dichomitus squalens LYAD-421 SS1] >gi|395331762|gb|EJF64142.1| WD40 repeat-like protein [Dichomitus squalens LYAD-421 SS1]	dsq:DICSQDRAFT_144831	WD40 repeat-like protein; K10415 dynein intermediate chain, cytosolic	--	--	--
GL15798-G	4.36	40.1533	3.20312	Up	0.877787	gi|597998571|ref|XP_007367932.1|	thiol oxidase [Dichomitus squalens LYAD-421 SS1] >gi|395326945|gb|EJF59349.1| FAD-dependent thiol oxidase [Dichomitus squalens LYAD-421 SS1]	dsq:DICSQDRAFT_138649	FAD-dependent thiol oxidase; K17783 mitochondrial FAD-linked sulfhydryl oxidase [EC:1.8.3.2]	GO:0055114 oxidation-reduction process	GO:0016972 thiol oxidase activity	--	gi|597998571|ref|XP_007367932.1|	thiol oxidase [Dichomitus squalens LYAD-421 SS1] >gi|395326945|gb|EJF59349.1| FAD-dependent thiol oxidase [Dichomitus squalens LYAD-421 SS1]	dsq:DICSQDRAFT_138649	FAD-dependent thiol oxidase; K17783 mitochondrial FAD-linked sulfhydryl oxidase [EC:1.8.3.2]	GO:0055114 oxidation-reduction process	GO:0016972 thiol oxidase activity	--
GL15817-G	7.19667	46.1133	2.67978	Up	0.867494	gi|597992261|ref|XP_007366300.1|	protein DICSQDRAFT_181036 [Dichomitus squalens LYAD-421 SS1] >gi|395328689|gb|EJF61080.1| hypothetical protein DICSQDRAFT_181036 [Dichomitus squalens LYAD-421 SS1]	--	--	--	--	--	gi|597992261|ref|XP_007366300.1|	protein DICSQDRAFT_181036 [Dichomitus squalens LYAD-421 SS1] >gi|395328689|gb|EJF61080.1| hypothetical protein DICSQDRAFT_181036 [Dichomitus squalens LYAD-421 SS1]	--	--	--	--	--
GL15827-G	3.05333	34.4833	3.49744	Up	0.869778	gi|597988405|ref|XP_007365298.1|	protein [Dichomitus squalens LYAD-421 SS1] >gi|395329657|gb|EJF62043.1| Piwi-domain-containing protein [Dichomitus squalens LYAD-421 SS1]	abp:AGABI1DRAFT123543	AGABI1DRAFT_123543; hypothetical protein; K11593 eukaryotic translation initiation factor 2C	--	GO:0003676 nucleic acid binding	--	gi|597988405|ref|XP_007365298.1|	protein [Dichomitus squalens LYAD-421 SS1] >gi|395329657|gb|EJF62043.1| Piwi-domain-containing protein [Dichomitus squalens LYAD-421 SS1]	abp:AGABI1DRAFT123543	AGABI1DRAFT_123543; hypothetical protein; K11593 eukaryotic translation initiation factor 2C	--	GO:0003676 nucleic acid binding	--
GL15831-G	5.97	41.1867	2.78637	Up	0.862413	gi|597988291|ref|XP_007365269.1|	protein DICSQDRAFT_161289 [Dichomitus squalens LYAD-421 SS1] >gi|395329628|gb|EJF62014.1| hypothetical protein DICSQDRAFT_161289 [Dichomitus squalens LYAD-421 SS1]	--	--	--	--	--	gi|597988291|ref|XP_007365269.1|	protein DICSQDRAFT_161289 [Dichomitus squalens LYAD-421 SS1] >gi|395329628|gb|EJF62014.1| hypothetical protein DICSQDRAFT_161289 [Dichomitus squalens LYAD-421 SS1]	--	--	--	--	--
GL15835-G	16.33	70.31	2.10621	Up	0.851871	gi|597987811|ref|XP_007365145.1|	protein DICSQDRAFT_180281 [Dichomitus squalens LYAD-421 SS1] >gi|395329504|gb|EJF61890.1| hypothetical protein DICSQDRAFT_180281 [Dichomitus squalens LYAD-421 SS1]	--	--	--	--	--	gi|597987811|ref|XP_007365145.1|	protein DICSQDRAFT_180281 [Dichomitus squalens LYAD-421 SS1] >gi|395329504|gb|EJF61890.1| hypothetical protein DICSQDRAFT_180281 [Dichomitus squalens LYAD-421 SS1]	--	--	--	--	--
GL15839-G	26.0467	0.7	-4.65572	Down	0.852514	gi|597981109|ref|XP_007363424.1|	[Dichomitus squalens LYAD-421 SS1] >gi|395331325|gb|EJF63706.1| hydrophobin [Dichomitus squalens LYAD-421 SS1]	psq:PUNSTDRAFT_125108	PP2C-domain-containing protein; K19704 protein phosphatase PTC1 [EC:3.1.3.16]	--	--	--	gi|597981109|ref|XP_007363424.1|	[Dichomitus squalens LYAD-421 SS1] >gi|395331325|gb|EJF63706.1| hydrophobin [Dichomitus squalens LYAD-421 SS1]	psq:PUNSTDRAFT_125108	PP2C-domain-containing protein; K19704 protein phosphatase PTC1 [EC:3.1.3.16]	--	--	--
GL15874-G	211.373	18.44	-3.51888	Down	0.96626	gi|597980523|ref|XP_007363270.1|	protein DICSQDRAFT_160181 [Dichomitus squalens LYAD-421 SS1] >gi|395332079|gb|EJF64459.1| hypothetical protein DICSQDRAFT_160181 [Dichomitus squalens LYAD-421 SS1]	--	--	--	--	--	gi|597980523|ref|XP_007363270.1|	protein DICSQDRAFT_160181 [Dichomitus squalens LYAD-421 SS1] >gi|395332079|gb|EJF64459.1| hypothetical protein DICSQDRAFT_160181 [Dichomitus squalens LYAD-421 SS1]	--	--	--	--	--
GL15876-G	3.95	31.0467	2.97451	Up	0.839556	gi|597980523|ref|XP_007363270.1|	protein DICSQDRAFT_160181 [Dichomitus squalens LYAD-421 SS1] >gi|395332079|gb|EJF64459.1| hypothetical protein DICSQDRAFT_160181 [Dichomitus squalens LYAD-421 SS1]	--	--	--	--	--	gi|597980523|ref|XP_007363270.1|	protein DICSQDRAFT_160181 [Dichomitus squalens LYAD-421 SS1] >gi|395332079|gb|EJF64459.1| hypothetical protein DICSQDRAFT_160181 [Dichomitus squalens LYAD-421 SS1]	--	--	--	--	--
GL15898-G	16.6033	62.0967	1.90304	Up	0.813864	gi|597999761|ref|XP_007368244.1|	protein DICSQDRAFT_66011 [Dichomitus squalens LYAD-421 SS1] >gi|395326533|gb|EJF58941.1| hypothetical protein DICSQDRAFT_66011 [Dichomitus squalens LYAD-421 SS1]	--	--	--	--	--	gi|597999761|ref|XP_007368244.1|	protein DICSQDRAFT_66011 [Dichomitus squalens LYAD-421 SS1] >gi|395326533|gb|EJF58941.1| hypothetical protein DICSQDRAFT_66011 [Dichomitus squalens LYAD-421 SS1]	--	--	--	--	--
GL15912-G	106.39	313.697	1.56001	Up	0.805002	gi|636620667|ref|XP_008041468.1|	dehydrogenase iron-sulfur subunit [Trametes versicolor FP-101664 SS1] >gi|392562663|gb|EIW55843.1| succinate dehydrogenase iron-sulfur subunit [Trametes versicolor FP-101664 SS1]	pco:PHACADRAFT_259610	hypothetical protein; K00235 succinate dehydrogenase (ubiquinone) iron-sulfur subunit [EC:1.3.5.1]	GO:0006099 tricarboxylic acid cycle	GO:0046872 metal ion binding | GO:0009055 electron carrier activity | GO:0051537 2 iron, 2 sulfur cluster binding | GO:0051539 4 iron, 4 sulfur cluster binding | GO:0008177 succinate dehydrogenase (ubiquinone) activity | GO:0051538 3 iron, 4 sulfur cluster binding	GO:0005743 mitochondrial inner membrane	gi|636620667|ref|XP_008041468.1|	dehydrogenase iron-sulfur subunit [Trametes versicolor FP-101664 SS1] >gi|392562663|gb|EIW55843.1| succinate dehydrogenase iron-sulfur subunit [Trametes versicolor FP-101664 SS1]	pco:PHACADRAFT_259610	hypothetical protein; K00235 succinate dehydrogenase (ubiquinone) iron-sulfur subunit [EC:1.3.5.1]	GO:0006099 tricarboxylic acid cycle	GO:0046872 metal ion binding | GO:0009055 electron carrier activity | GO:0051537 2 iron, 2 sulfur cluster binding | GO:0051539 4 iron, 4 sulfur cluster binding | GO:0008177 succinate dehydrogenase (ubiquinone) activity | GO:0051538 3 iron, 4 sulfur cluster binding	GO:0005743 mitochondrial inner membrane
GL15913-G	19.0467	88.03	2.20846	Up	0.874819	gi|636620687|ref|XP_008041478.1|	protein TRAVEDRAFT_171773 [Trametes versicolor FP-101664 SS1] >gi|392562677|gb|EIW55857.1| hypothetical protein TRAVEDRAFT_171773 [Trametes versicolor FP-101664 SS1]	--	--	--	--	--	gi|636620687|ref|XP_008041478.1|	protein TRAVEDRAFT_171773 [Trametes versicolor FP-101664 SS1] >gi|392562677|gb|EIW55857.1| hypothetical protein TRAVEDRAFT_171773 [Trametes versicolor FP-101664 SS1]	--	--	--	--	--
GL15936-G	713.567	120.99	-2.56016	Down	0.942471	gi|597980937|ref|XP_007363381.1|	protein DICSQDRAFT_153531 [Dichomitus squalens LYAD-421 SS1] >gi|395331282|gb|EJF63663.1| hypothetical protein DICSQDRAFT_153531 [Dichomitus squalens LYAD-421 SS1]	dsq:DICSQDRAFT_129683	hypothetical protein; K11309 regulator of Ty1 transposition protein 109	--	--	--	gi|597980937|ref|XP_007363381.1|	protein DICSQDRAFT_153531 [Dichomitus squalens LYAD-421 SS1] >gi|395331282|gb|EJF63663.1| hypothetical protein DICSQDRAFT_153531 [Dichomitus squalens LYAD-421 SS1]	dsq:DICSQDRAFT_129683	hypothetical protein; K11309 regulator of Ty1 transposition protein 109	--	--	--
GL15946-G	18.6533	65.79	1.81843	Up	0.804674	gi|597981183|ref|XP_007363444.1|	protein DICSQDRAFT_101697 [Dichomitus squalens LYAD-421 SS1] >gi|395331345|gb|EJF63726.1| hypothetical protein DICSQDRAFT_101697 [Dichomitus squalens LYAD-421 SS1]	dsq:DICSQDRAFT_101697	hypothetical protein; K08331 autophagy-related protein 13	--	--	--	gi|597981183|ref|XP_007363444.1|	protein DICSQDRAFT_101697 [Dichomitus squalens LYAD-421 SS1] >gi|395331345|gb|EJF63726.1| hypothetical protein DICSQDRAFT_101697 [Dichomitus squalens LYAD-421 SS1]	dsq:DICSQDRAFT_101697	hypothetical protein; K08331 autophagy-related protein 13	--	--	--
GL15986-G	102.463	378.243	1.88421	Up	0.866549	gi|597997017|ref|XP_007367533.1|	P450 [Dichomitus squalens LYAD-421 SS1] >gi|395327421|gb|EJF59821.1| cytochrome P450 [Dichomitus squalens LYAD-421 SS1]	fpu:FPSE_05313	hypothetical protein; K16261 yeast amino acid transporter	GO:0055114 oxidation-reduction process	GO:0020037 heme binding | GO:0016705 oxidoreductase activity, acting on paired donors, with incorporation or reduction of molecular oxygen | GO:0004497 monooxygenase activity | GO:0005506 iron ion binding	--	gi|597997017|ref|XP_007367533.1|	P450 [Dichomitus squalens LYAD-421 SS1] >gi|395327421|gb|EJF59821.1| cytochrome P450 [Dichomitus squalens LYAD-421 SS1]	fpu:FPSE_05313	hypothetical protein; K16261 yeast amino acid transporter	GO:0055114 oxidation-reduction process	GO:0020037 heme binding | GO:0016705 oxidoreductase activity, acting on paired donors, with incorporation or reduction of molecular oxygen | GO:0004497 monooxygenase activity | GO:0005506 iron ion binding	--
GL15990-G	8.96667	54.0933	2.59281	Up	0.87587	gi|597996685|ref|XP_007367450.1|	protein DICSQDRAFT_156089 [Dichomitus squalens LYAD-421 SS1] >gi|395327338|gb|EJF59738.1| hypothetical protein DICSQDRAFT_156089 [Dichomitus squalens LYAD-421 SS1]	ppl:POSPLDRAFT_97793	hypothetical protein; K15053 charged multivesicular body protein 7	--	--	--	gi|597996685|ref|XP_007367450.1|	protein DICSQDRAFT_156089 [Dichomitus squalens LYAD-421 SS1] >gi|395327338|gb|EJF59738.1| hypothetical protein DICSQDRAFT_156089 [Dichomitus squalens LYAD-421 SS1]	ppl:POSPLDRAFT_97793	hypothetical protein; K15053 charged multivesicular body protein 7	--	--	--
GL16023-G	3.27667	48.5567	3.88937	Up	0.911619	gi|636622439|ref|XP_008042354.1|	protein TRAVEDRAFT_66465 [Trametes versicolor FP-101664 SS1] >gi|392561939|gb|EIW55120.1| hypothetical protein TRAVEDRAFT_66465 [Trametes versicolor FP-101664 SS1]	--	--	--	--	--	gi|636622439|ref|XP_008042354.1|	protein TRAVEDRAFT_66465 [Trametes versicolor FP-101664 SS1] >gi|392561939|gb|EIW55120.1| hypothetical protein TRAVEDRAFT_66465 [Trametes versicolor FP-101664 SS1]	--	--	--	--	--
GL16049-G	97.83	859.863	3.13576	Up	0.969122	gi|598000337|ref|XP_007368400.1|	protein DICSQDRAFT_66062 [Dichomitus squalens LYAD-421 SS1] >gi|395326519|gb|EJF58928.1| hypothetical protein DICSQDRAFT_66062 [Dichomitus squalens LYAD-421 SS1]	--	--	--	--	--	gi|598000337|ref|XP_007368400.1|	protein DICSQDRAFT_66062 [Dichomitus squalens LYAD-421 SS1] >gi|395326519|gb|EJF58928.1| hypothetical protein DICSQDRAFT_66062 [Dichomitus squalens LYAD-421 SS1]	--	--	--	--	--
GL16088-G	26.6533	102.437	1.94234	Up	0.84788	gi|598002347|ref|XP_007368914.1|	protein DICSQDRAFT_139460 [Dichomitus squalens LYAD-421 SS1] >gi|395325964|gb|EJF58379.1| hypothetical protein DICSQDRAFT_139460 [Dichomitus squalens LYAD-421 SS1]	--	--	--	--	GO:0016021 integral component of membrane	gi|598002347|ref|XP_007368914.1|	protein DICSQDRAFT_139460 [Dichomitus squalens LYAD-421 SS1] >gi|395325964|gb|EJF58379.1| hypothetical protein DICSQDRAFT_139460 [Dichomitus squalens LYAD-421 SS1]	--	--	--	--	GO:0016021 integral component of membrane
GL16094-G	12.9833	60.5667	2.22186	Up	0.853433	gi|598002367|ref|XP_007368919.1|	protein DICSQDRAFT_139465 [Dichomitus squalens LYAD-421 SS1] >gi|395325969|gb|EJF58384.1| hypothetical protein DICSQDRAFT_139465 [Dichomitus squalens LYAD-421 SS1]	lbc:LACBIDRAFT_317671	hypothetical protein; K09274 HMG box factor, other	--	--	--	gi|598002367|ref|XP_007368919.1|	protein DICSQDRAFT_139465 [Dichomitus squalens LYAD-421 SS1] >gi|395325969|gb|EJF58384.1| hypothetical protein DICSQDRAFT_139465 [Dichomitus squalens LYAD-421 SS1]	lbc:LACBIDRAFT_317671	hypothetical protein; K09274 HMG box factor, other	--	--	--
GL16164-G	1689.26	563.033	-1.5851	Down	0.822752	gi|1018936212|dbj|GAT42509.1|	protein [Mycena chlorophos]	--	--	--	--	--	gi|1018936212|dbj|GAT42509.1|	protein [Mycena chlorophos]	--	--	--	--	--
GL16175-G	13.33	54	2.01828	Up	0.821386	gi|597996733|ref|XP_007367462.1|	protein DICSQDRAFT_156094 [Dichomitus squalens LYAD-421 SS1] >gi|395327350|gb|EJF59750.1| hypothetical protein DICSQDRAFT_156094 [Dichomitus squalens LYAD-421 SS1]	--	--	--	--	--	gi|597996733|ref|XP_007367462.1|	protein DICSQDRAFT_156094 [Dichomitus squalens LYAD-421 SS1] >gi|395327350|gb|EJF59750.1| hypothetical protein DICSQDRAFT_156094 [Dichomitus squalens LYAD-421 SS1]	--	--	--	--	--
GL16210-G	12.9033	50.93	1.98077	Up	0.810818	gi|597992989|ref|XP_007366499.1|	protein DICSQDRAFT_62362 [Dichomitus squalens LYAD-421 SS1] >gi|395328269|gb|EJF60662.1| hypothetical protein DICSQDRAFT_62362 [Dichomitus squalens LYAD-421 SS1]	--	--	--	--	--	gi|597992989|ref|XP_007366499.1|	protein DICSQDRAFT_62362 [Dichomitus squalens LYAD-421 SS1] >gi|395328269|gb|EJF60662.1| hypothetical protein DICSQDRAFT_62362 [Dichomitus squalens LYAD-421 SS1]	--	--	--	--	--
GL16212-G	27.9467	4.7	-2.57194	Down	0.803072	gi|636623713|ref|XP_008042991.1|	protein TRAVEDRAFT_66684 [Trametes versicolor FP-101664 SS1] >gi|392560861|gb|EIW54043.1| hypothetical protein TRAVEDRAFT_66684 [Trametes versicolor FP-101664 SS1]	--	--	--	--	--	gi|636623713|ref|XP_008042991.1|	protein TRAVEDRAFT_66684 [Trametes versicolor FP-101664 SS1] >gi|392560861|gb|EIW54043.1| hypothetical protein TRAVEDRAFT_66684 [Trametes versicolor FP-101664 SS1]	--	--	--	--	--
GL16213-G	34.3267	241.9	2.81701	Up	0.946829	gi|636623743|ref|XP_008043006.1|	protein TRAVEDRAFT_74349 [Trametes versicolor FP-101664 SS1] >gi|392560884|gb|EIW54066.1| hypothetical protein TRAVEDRAFT_74349 [Trametes versicolor FP-101664 SS1]	--	--	--	--	--	gi|636623743|ref|XP_008043006.1|	protein TRAVEDRAFT_74349 [Trametes versicolor FP-101664 SS1] >gi|392560884|gb|EIW54066.1| hypothetical protein TRAVEDRAFT_74349 [Trametes versicolor FP-101664 SS1]	--	--	--	--	--
GL16214-G	13.87	116.247	3.06715	Up	0.941079	gi|598007043|ref|XP_007370106.1|	protein DICSQDRAFT_70079 [Dichomitus squalens LYAD-421 SS1] >gi|395324729|gb|EJF57164.1| hypothetical protein DICSQDRAFT_70079 [Dichomitus squalens LYAD-421 SS1]	--	--	--	--	--	gi|598007043|ref|XP_007370106.1|	protein DICSQDRAFT_70079 [Dichomitus squalens LYAD-421 SS1] >gi|395324729|gb|EJF57164.1| hypothetical protein DICSQDRAFT_70079 [Dichomitus squalens LYAD-421 SS1]	--	--	--	--	--
GL16216-G	36.0533	7.47	-2.27095	Down	0.809886	gi|972532392|gb|KUJ09032.1|	protein LY89DRAFT_788446 [Phialocephala scopiformis]	--	--	--	--	--	gi|972532392|gb|KUJ09032.1|	protein LY89DRAFT_788446 [Phialocephala scopiformis]	--	--	--	--	--
GL16221-G	22.21	107.19	2.27089	Up	0.889576	gi|597992933|ref|XP_007366484.1|	protein DICSQDRAFT_181155 [Dichomitus squalens LYAD-421 SS1] >gi|395328254|gb|EJF60647.1| hypothetical protein DICSQDRAFT_181155 [Dichomitus squalens LYAD-421 SS1]	--	--	--	--	--	gi|597992933|ref|XP_007366484.1|	protein DICSQDRAFT_181155 [Dichomitus squalens LYAD-421 SS1] >gi|395328254|gb|EJF60647.1| hypothetical protein DICSQDRAFT_181155 [Dichomitus squalens LYAD-421 SS1]	--	--	--	--	--
GL16257-G	367.283	101.323	-1.85793	Down	0.863161	gi|598002163|ref|XP_007368865.1|	protein DICSQDRAFT_139421 [Dichomitus squalens LYAD-421 SS1] >gi|395325915|gb|EJF58330.1| hypothetical protein DICSQDRAFT_139421 [Dichomitus squalens LYAD-421 SS1]	--	--	--	--	--	gi|598002163|ref|XP_007368865.1|	protein DICSQDRAFT_139421 [Dichomitus squalens LYAD-421 SS1] >gi|395325915|gb|EJF58330.1| hypothetical protein DICSQDRAFT_139421 [Dichomitus squalens LYAD-421 SS1]	--	--	--	--	--
GL16289-G	94.9733	567.23	2.57834	Up	0.942865	gi|597986237|ref|XP_007364744.1|	protein DICSQDRAFT_160987 [Dichomitus squalens LYAD-421 SS1] >gi|395330287|gb|EJF62671.1| hypothetical protein DICSQDRAFT_160987 [Dichomitus squalens LYAD-421 SS1]	--	--	--	--	--	gi|597986237|ref|XP_007364744.1|	protein DICSQDRAFT_160987 [Dichomitus squalens LYAD-421 SS1] >gi|395330287|gb|EJF62671.1| hypothetical protein DICSQDRAFT_160987 [Dichomitus squalens LYAD-421 SS1]	--	--	--	--	--
GL16290-G	12.11	62.55	2.36881	Up	0.869568	gi|691796430|emb|CDO68865.1|	protein BN946_scf185000.g8 [Trametes cinnabarina]	--	--	--	--	--	gi|691796430|emb|CDO68865.1|	protein BN946_scf185000.g8 [Trametes cinnabarina]	--	--	--	--	--
GL16315-G	4.87	32.6567	2.74538	Up	0.834436	gi|597986325|ref|XP_007364767.1|	alpha N-terminal domain-containing protein [Dichomitus squalens LYAD-421 SS1] >gi|395330310|gb|EJF62694.1| integrin alpha N-terminal domain-containing protein [Dichomitus squalens LYAD-421 SS1]	dsq:DICSQDRAFT_57859	integrin alpha N-terminal domain-containing protein; K17257 integrin alpha FG-GAP repeat containing protein 1	--	--	GO:0016020 membrane	gi|597986325|ref|XP_007364767.1|	alpha N-terminal domain-containing protein [Dichomitus squalens LYAD-421 SS1] >gi|395330310|gb|EJF62694.1| integrin alpha N-terminal domain-containing protein [Dichomitus squalens LYAD-421 SS1]	dsq:DICSQDRAFT_57859	integrin alpha N-terminal domain-containing protein; K17257 integrin alpha FG-GAP repeat containing protein 1	--	--	GO:0016020 membrane
GL16344-G	3.72333	41.23	3.46903	Up	0.888342	gi|597986493|ref|XP_007364811.1|	protein DICSQDRAFT_104303 [Dichomitus squalens LYAD-421 SS1] >gi|395330354|gb|EJF62738.1| hypothetical protein DICSQDRAFT_104303 [Dichomitus squalens LYAD-421 SS1]	--	--	--	--	--	gi|597986493|ref|XP_007364811.1|	protein DICSQDRAFT_104303 [Dichomitus squalens LYAD-421 SS1] >gi|395330354|gb|EJF62738.1| hypothetical protein DICSQDRAFT_104303 [Dichomitus squalens LYAD-421 SS1]	--	--	--	--	--
GL16350-G	138.467	655.42	2.24288	Up	0.916398	gi|598010273|ref|XP_007370985.1|	protein DICSQDRAFT_141358 [Dichomitus squalens LYAD-421 SS1] >gi|395323857|gb|EJF56312.1| hypothetical protein DICSQDRAFT_141358 [Dichomitus squalens LYAD-421 SS1]	--	--	--	--	--	gi|598010273|ref|XP_007370985.1|	protein DICSQDRAFT_141358 [Dichomitus squalens LYAD-421 SS1] >gi|395323857|gb|EJF56312.1| hypothetical protein DICSQDRAFT_141358 [Dichomitus squalens LYAD-421 SS1]	--	--	--	--	--
GL16365-G	22.2633	0	-5.48736	Down	0.837272	gi|598003661|ref|XP_007369288.1|	protein DICSQDRAFT_173406 [Dichomitus squalens LYAD-421 SS1] >gi|395325620|gb|EJF58040.1| hypothetical protein DICSQDRAFT_173406 [Dichomitus squalens LYAD-421 SS1]	--	--	--	--	--	gi|598003661|ref|XP_007369288.1|	protein DICSQDRAFT_173406 [Dichomitus squalens LYAD-421 SS1] >gi|395325620|gb|EJF58040.1| hypothetical protein DICSQDRAFT_173406 [Dichomitus squalens LYAD-421 SS1]	--	--	--	--	--
GL16396-G	231.223	11.4133	-4.34049	Down	0.978312	gi|597999433|ref|XP_007368155.1|	protein DICSQDRAFT_65724 [Dichomitus squalens LYAD-421 SS1] >gi|395326628|gb|EJF59035.1| hypothetical protein DICSQDRAFT_65724 [Dichomitus squalens LYAD-421 SS1]	fpu:FPSE_02859	hypothetical protein; K01426 amidase [EC:3.5.1.4]	--	--	--	gi|597999433|ref|XP_007368155.1|	protein DICSQDRAFT_65724 [Dichomitus squalens LYAD-421 SS1] >gi|395326628|gb|EJF59035.1| hypothetical protein DICSQDRAFT_65724 [Dichomitus squalens LYAD-421 SS1]	fpu:FPSE_02859	hypothetical protein; K01426 amidase [EC:3.5.1.4]	--	--	--
GL16399-G	9.48	47.2633	2.31776	Up	0.842865	gi|636615185|ref|XP_008038727.1|	protein TRAVEDRAFT_72039 [Trametes versicolor FP-101664 SS1] >gi|392565305|gb|EIW58482.1| hypothetical protein TRAVEDRAFT_72039 [Trametes versicolor FP-101664 SS1]	--	--	--	GO:0046872 metal ion binding	--	gi|636615185|ref|XP_008038727.1|	protein TRAVEDRAFT_72039 [Trametes versicolor FP-101664 SS1] >gi|392565305|gb|EIW58482.1| hypothetical protein TRAVEDRAFT_72039 [Trametes versicolor FP-101664 SS1]	--	--	--	GO:0046872 metal ion binding	--
GL16402-G	6.31333	42.6733	2.75686	Up	0.864487	gi|691795559|emb|CDO69686.1|	protein BN946_scf184851.g74 [Trametes cinnabarina]	wic:J056_001839	Heat shock factor protein 4; K09417 heat shock transcription factor 4	--	GO:0003677 DNA binding	--	gi|691795559|emb|CDO69686.1|	protein BN946_scf184851.g74 [Trametes cinnabarina]	wic:J056_001839	Heat shock factor protein 4; K09417 heat shock transcription factor 4	--	GO:0003677 DNA binding	--
GL16403-G	4.72	27.9033	2.56358	Up	0.802087	gi|598003385|ref|XP_007369213.1|	protein DICSQDRAFT_139749 [Dichomitus squalens LYAD-421 SS1] >gi|395325688|gb|EJF58107.1| hypothetical protein DICSQDRAFT_139749 [Dichomitus squalens LYAD-421 SS1]	--	--	GO:0006355 regulation of transcription, DNA-templated	GO:0043565 sequence-specific DNA binding | GO:0003700 transcription factor activity, sequence-specific DNA binding	GO:0005634 nucleus	gi|598003385|ref|XP_007369213.1|	protein DICSQDRAFT_139749 [Dichomitus squalens LYAD-421 SS1] >gi|395325688|gb|EJF58107.1| hypothetical protein DICSQDRAFT_139749 [Dichomitus squalens LYAD-421 SS1]	--	--	GO:0006355 regulation of transcription, DNA-templated	GO:0043565 sequence-specific DNA binding | GO:0003700 transcription factor activity, sequence-specific DNA binding	GO:0005634 nucleus
GL16445-G	6.28667	41.2867	2.71531	Up	0.858895	gi|636626647|ref|XP_008044458.1|	protein TRAVEDRAFT_75160 [Trametes versicolor FP-101664 SS1] >gi|392559748|gb|EIW52932.1| hypothetical protein TRAVEDRAFT_75160 [Trametes versicolor FP-101664 SS1]	--	--	--	--	--	gi|636626647|ref|XP_008044458.1|	protein TRAVEDRAFT_75160 [Trametes versicolor FP-101664 SS1] >gi|392559748|gb|EIW52932.1| hypothetical protein TRAVEDRAFT_75160 [Trametes versicolor FP-101664 SS1]	--	--	--	--	--
GL16472-G	19.43	67.42	1.79489	Up	0.801575	gi|597998115|ref|XP_007367813.1|	protein DICSQDRAFT_181944 [Dichomitus squalens LYAD-421 SS1] >gi|395327031|gb|EJF59434.1| hypothetical protein DICSQDRAFT_181944 [Dichomitus squalens LYAD-421 SS1]	--	--	--	--	--	gi|597998115|ref|XP_007367813.1|	protein DICSQDRAFT_181944 [Dichomitus squalens LYAD-421 SS1] >gi|395327031|gb|EJF59434.1| hypothetical protein DICSQDRAFT_181944 [Dichomitus squalens LYAD-421 SS1]	--	--	--	--	--
GL16584-G	6.39333	58.76	3.20019	Up	0.91066	gi|598004021|ref|XP_007369378.1|	protein DICSQDRAFT_182917 [Dichomitus squalens LYAD-421 SS1] >gi|395325459|gb|EJF57881.1| hypothetical protein DICSQDRAFT_182917 [Dichomitus squalens LYAD-421 SS1]	dsq:DICSQDRAFT_163198	anthranilate phosphoribosyltransferase; K00766 anthranilate phosphoribosyltransferase [EC:2.4.2.18]	--	--	--	gi|598004021|ref|XP_007369378.1|	protein DICSQDRAFT_182917 [Dichomitus squalens LYAD-421 SS1] >gi|395325459|gb|EJF57881.1| hypothetical protein DICSQDRAFT_182917 [Dichomitus squalens LYAD-421 SS1]	dsq:DICSQDRAFT_163198	anthranilate phosphoribosyltransferase; K00766 anthranilate phosphoribosyltransferase [EC:2.4.2.18]	--	--	--
GL16616-G	2.17333	23.7433	3.44954	Up	0.819929	gi|691793612|emb|CDO71406.1|	protein BN946_scf184908.g164 [Trametes cinnabarina]	--	--	--	--	--	gi|691793612|emb|CDO71406.1|	protein BN946_scf184908.g164 [Trametes cinnabarina]	--	--	--	--	--
GL16699-G	24.8167	118.67	2.25757	Up	0.892425	gi|597976439|ref|XP_007362235.1|	protein DICSQDRAFT_166602 [Dichomitus squalens LYAD-421 SS1] >gi|395333221|gb|EJF65599.1| hypothetical protein DICSQDRAFT_166602 [Dichomitus squalens LYAD-421 SS1]	--	--	--	--	--	gi|597976439|ref|XP_007362235.1|	protein DICSQDRAFT_166602 [Dichomitus squalens LYAD-421 SS1] >gi|395333221|gb|EJF65599.1| hypothetical protein DICSQDRAFT_166602 [Dichomitus squalens LYAD-421 SS1]	--	--	--	--	--
GL16705-G	7.89	37.3233	2.24198	Up	0.81108	gi|597976257|ref|XP_007362189.1|	protein DICSQDRAFT_133159 [Dichomitus squalens LYAD-421 SS1] >gi|395333175|gb|EJF65553.1| hypothetical protein DICSQDRAFT_133159 [Dichomitus squalens LYAD-421 SS1]	--	--	--	--	--	gi|597976257|ref|XP_007362189.1|	protein DICSQDRAFT_133159 [Dichomitus squalens LYAD-421 SS1] >gi|395333175|gb|EJF65553.1| hypothetical protein DICSQDRAFT_133159 [Dichomitus squalens LYAD-421 SS1]	--	--	--	--	--
GL16716-G	15.3967	64.99	2.0776	Up	0.843232	gi|597976123|ref|XP_007362154.1|	protein DICSQDRAFT_79758 [Dichomitus squalens LYAD-421 SS1] >gi|395333140|gb|EJF65518.1| hypothetical protein DICSQDRAFT_79758 [Dichomitus squalens LYAD-421 SS1]	--	--	--	--	GO:0016020 membrane	gi|597976123|ref|XP_007362154.1|	protein DICSQDRAFT_79758 [Dichomitus squalens LYAD-421 SS1] >gi|395333140|gb|EJF65518.1| hypothetical protein DICSQDRAFT_79758 [Dichomitus squalens LYAD-421 SS1]	--	--	--	--	GO:0016020 membrane
GL16717-G	49.9233	155.32	1.63746	Up	0.811225	gi|636604909|ref|XP_008033589.1|	protein [Trametes versicolor FP-101664 SS1] >gi|392570254|gb|EIW63427.1| NIF-domain-containing protein [Trametes versicolor FP-101664 SS1]	pco:PHACADRAFT_146736	hypothetical protein; K15731 carboxy-terminal domain RNA polymerase II polypeptide A small phosphatase [EC:3.1.3.16]	GO:0016311 dephosphorylation	GO:0016791 phosphatase activity	--	gi|636604909|ref|XP_008033589.1|	protein [Trametes versicolor FP-101664 SS1] >gi|392570254|gb|EIW63427.1| NIF-domain-containing protein [Trametes versicolor FP-101664 SS1]	pco:PHACADRAFT_146736	hypothetical protein; K15731 carboxy-terminal domain RNA polymerase II polypeptide A small phosphatase [EC:3.1.3.16]	GO:0016311 dephosphorylation	GO:0016791 phosphatase activity	--
GL16723-G	63.53	9.71333	-2.7094	Down	0.894972	gi|597998611|ref|XP_007367942.1|	protein DICSQDRAFT_172150 [Dichomitus squalens LYAD-421 SS1] >gi|395326955|gb|EJF59359.1| hypothetical protein DICSQDRAFT_172150 [Dichomitus squalens LYAD-421 SS1]	--	--	--	--	--	gi|597998611|ref|XP_007367942.1|	protein DICSQDRAFT_172150 [Dichomitus squalens LYAD-421 SS1] >gi|395326955|gb|EJF59359.1| hypothetical protein DICSQDRAFT_172150 [Dichomitus squalens LYAD-421 SS1]	--	--	--	--	--
GL16739-G	2.51	40.8533	4.02469	Up	0.898385	gi|597998455|ref|XP_007367901.1|	protein [Dichomitus squalens LYAD-421 SS1] >gi|395326914|gb|EJF59318.1| thioredoxin-like protein [Dichomitus squalens LYAD-421 SS1]	dsq:DICSQDRAFT_172112	thioredoxin-like protein; K00799 glutathione S-transferase [EC:2.5.1.18]	--	--	--	gi|597998455|ref|XP_007367901.1|	protein [Dichomitus squalens LYAD-421 SS1] >gi|395326914|gb|EJF59318.1| thioredoxin-like protein [Dichomitus squalens LYAD-421 SS1]	dsq:DICSQDRAFT_172112	thioredoxin-like protein; K00799 glutathione S-transferase [EC:2.5.1.18]	--	--	--
GL16750-G	11.9133	53.0667	2.15523	Up	0.836248	gi|597993777|ref|XP_007366703.1|	protein DICSQDRAFT_39682, partial [Dichomitus squalens LYAD-421 SS1] >gi|395328170|gb|EJF60564.1| hypothetical protein DICSQDRAFT_39682, partial [Dichomitus squalens LYAD-421 SS1]	shs:STEHIDRAFT_148013	hypothetical protein; K09184 GATA-binding protein, other eukaryote	--	--	--	gi|597993777|ref|XP_007366703.1|	protein DICSQDRAFT_39682, partial [Dichomitus squalens LYAD-421 SS1] >gi|395328170|gb|EJF60564.1| hypothetical protein DICSQDRAFT_39682, partial [Dichomitus squalens LYAD-421 SS1]	shs:STEHIDRAFT_148013	hypothetical protein; K09184 GATA-binding protein, other eukaryote	--	--	--
GL16784-G	7.46667	44.4233	2.57278	Up	0.857175	gi|597983677|ref|XP_007364088.1|	protein DICSQDRAFT_12532, partial [Dichomitus squalens LYAD-421 SS1] >gi|395331154|gb|EJF63536.1| hypothetical protein DICSQDRAFT_12532, partial [Dichomitus squalens LYAD-421 SS1]	--	--	--	--	--	gi|597983677|ref|XP_007364088.1|	protein DICSQDRAFT_12532, partial [Dichomitus squalens LYAD-421 SS1] >gi|395331154|gb|EJF63536.1| hypothetical protein DICSQDRAFT_12532, partial [Dichomitus squalens LYAD-421 SS1]	--	--	--	--	--
GL16794-G	7.18	38.52	2.39045	Up	0.828239	--	--	--	--	--	--	--	--	--	--	--	--	--	--
GL16826-G	18.4867	75.8033	2.03578	Up	0.848182	gi|597982447|ref|XP_007363773.1|	repeat-like protein [Dichomitus squalens LYAD-421 SS1] >gi|395330839|gb|EJF63221.1| WD40 repeat-like protein [Dichomitus squalens LYAD-421 SS1]	dsq:DICSQDRAFT_134655	WD40 repeat-like protein; K11800 WD repeat-containing protein 22	--	--	--	gi|597982447|ref|XP_007363773.1|	repeat-like protein [Dichomitus squalens LYAD-421 SS1] >gi|395330839|gb|EJF63221.1| WD40 repeat-like protein [Dichomitus squalens LYAD-421 SS1]	dsq:DICSQDRAFT_134655	WD40 repeat-like protein; K11800 WD repeat-containing protein 22	--	--	--
GL16827-G	16.1033	67.26	2.06239	Up	0.842983	gi|597983477|ref|XP_007364038.1|	protein [Dichomitus squalens LYAD-421 SS1] >gi|395331104|gb|EJF63486.1| Emopamil-binding protein [Dichomitus squalens LYAD-421 SS1]	pfp:PFL1_03075	hypothetical protein; K03844 alpha-1,2-mannosyltransferase [EC:2.4.1.131]	GO:0016125 sterol metabolic process	GO:0047750 cholestenol delta-isomerase activity	GO:0016021 integral component of membrane	gi|597983477|ref|XP_007364038.1|	protein [Dichomitus squalens LYAD-421 SS1] >gi|395331104|gb|EJF63486.1| Emopamil-binding protein [Dichomitus squalens LYAD-421 SS1]	pfp:PFL1_03075	hypothetical protein; K03844 alpha-1,2-mannosyltransferase [EC:2.4.1.131]	GO:0016125 sterol metabolic process	GO:0047750 cholestenol delta-isomerase activity	GO:0016021 integral component of membrane
GL16832-G	213.217	55.99	-1.92908	Down	0.866207	gi|597982369|ref|XP_007363752.1|	protein DICSQDRAFT_153789 [Dichomitus squalens LYAD-421 SS1] >gi|395330818|gb|EJF63200.1| hypothetical protein DICSQDRAFT_153789 [Dichomitus squalens LYAD-421 SS1]	aor:AOR_1_1498014	AO090026000835; ARF GTPase activator (Csx2); K12488 Arf-GAP with SH3 domain, ANK repeat and PH domain-containing protein	--	--	--	gi|597982369|ref|XP_007363752.1|	protein DICSQDRAFT_153789 [Dichomitus squalens LYAD-421 SS1] >gi|395330818|gb|EJF63200.1| hypothetical protein DICSQDRAFT_153789 [Dichomitus squalens LYAD-421 SS1]	aor:AOR_1_1498014	AO090026000835; ARF GTPase activator (Csx2); K12488 Arf-GAP with SH3 domain, ANK repeat and PH domain-containing protein	--	--	--
GL16836-G	3.44333	30.5267	3.14819	Up	0.844873	gi|597982201|ref|XP_007363707.1|	protein DICSQDRAFT_153764 [Dichomitus squalens LYAD-421 SS1] >gi|395330773|gb|EJF63155.1| hypothetical protein DICSQDRAFT_153764 [Dichomitus squalens LYAD-421 SS1]	--	--	--	--	--	gi|597982201|ref|XP_007363707.1|	protein DICSQDRAFT_153764 [Dichomitus squalens LYAD-421 SS1] >gi|395330773|gb|EJF63155.1| hypothetical protein DICSQDRAFT_153764 [Dichomitus squalens LYAD-421 SS1]	--	--	--	--	--
GL16844-G	20.1667	80.4833	1.99672	Up	0.846015	gi|691793119|emb|CDO71698.1|	protein BN946_scf184915.g42 [Trametes cinnabarina]	lbc:LACBIDRAFT_308943	hypothetical protein; K14796 nucleolar protein TMA23	--	--	--	gi|691793119|emb|CDO71698.1|	protein BN946_scf184915.g42 [Trametes cinnabarina]	lbc:LACBIDRAFT_308943	hypothetical protein; K14796 nucleolar protein TMA23	--	--	--
GL16890-G	6.14333	43.93	2.83811	Up	0.872115	gi|597982699|ref|XP_007363839.1|	protein DICSQDRAFT_134718 [Dichomitus squalens LYAD-421 SS1] >gi|395330905|gb|EJF63287.1| hypothetical protein DICSQDRAFT_134718 [Dichomitus squalens LYAD-421 SS1]	dsq:DICSQDRAFT_134718	hypothetical protein; K18470 Rho GTPase-activating protein 1	--	--	GO:0016020 membrane	gi|597982699|ref|XP_007363839.1|	protein DICSQDRAFT_134718 [Dichomitus squalens LYAD-421 SS1] >gi|395330905|gb|EJF63287.1| hypothetical protein DICSQDRAFT_134718 [Dichomitus squalens LYAD-421 SS1]	dsq:DICSQDRAFT_134718	hypothetical protein; K18470 Rho GTPase-activating protein 1	--	--	GO:0016020 membrane
GL16900-G	47.08	144.673	1.61961	Up	0.804503	gi|597982885|ref|XP_007363889.1|	protein DICSQDRAFT_55735 [Dichomitus squalens LYAD-421 SS1] >gi|395330955|gb|EJF63337.1| hypothetical protein DICSQDRAFT_55735 [Dichomitus squalens LYAD-421 SS1]	--	--	--	--	--	gi|597982885|ref|XP_007363889.1|	protein DICSQDRAFT_55735 [Dichomitus squalens LYAD-421 SS1] >gi|395330955|gb|EJF63337.1| hypothetical protein DICSQDRAFT_55735 [Dichomitus squalens LYAD-421 SS1]	--	--	--	--	--
GL16904-G	12.5467	81.7167	2.70333	Up	0.908941	gi|597982817|ref|XP_007363871.1|	protein DICSQDRAFT_102480 [Dichomitus squalens LYAD-421 SS1] >gi|395330937|gb|EJF63319.1| hypothetical protein DICSQDRAFT_102480 [Dichomitus squalens LYAD-421 SS1]	--	--	--	--	--	gi|597982817|ref|XP_007363871.1|	protein DICSQDRAFT_102480 [Dichomitus squalens LYAD-421 SS1] >gi|395330937|gb|EJF63319.1| hypothetical protein DICSQDRAFT_102480 [Dichomitus squalens LYAD-421 SS1]	--	--	--	--	--
GL16905-G	115.88	22.74	-2.34933	Down	0.899908	gi|597982891|ref|XP_007363891.1|	protein DICSQDRAFT_56311 [Dichomitus squalens LYAD-421 SS1] >gi|395330957|gb|EJF63339.1| hypothetical protein DICSQDRAFT_56311 [Dichomitus squalens LYAD-421 SS1]	pcs:Pc13g10620	Pc13g10620; K00799 glutathione S-transferase [EC:2.5.1.18]	--	--	--	gi|597982891|ref|XP_007363891.1|	protein DICSQDRAFT_56311 [Dichomitus squalens LYAD-421 SS1] >gi|395330957|gb|EJF63339.1| hypothetical protein DICSQDRAFT_56311 [Dichomitus squalens LYAD-421 SS1]	pcs:Pc13g10620	Pc13g10620; K00799 glutathione S-transferase [EC:2.5.1.18]	--	--	--
GL16911-G	11.0467	68.34	2.62912	Up	0.895287	gi|597983163|ref|XP_007363959.1|	protein DICSQDRAFT_55483 [Dichomitus squalens LYAD-421 SS1] >gi|395331025|gb|EJF63407.1| hypothetical protein DICSQDRAFT_55483 [Dichomitus squalens LYAD-421 SS1]	--	--	--	--	--	gi|597983163|ref|XP_007363959.1|	protein DICSQDRAFT_55483 [Dichomitus squalens LYAD-421 SS1] >gi|395331025|gb|EJF63407.1| hypothetical protein DICSQDRAFT_55483 [Dichomitus squalens LYAD-421 SS1]	--	--	--	--	--
GL16914-G	40.9833	174.233	2.08791	Up	0.885703	gi|597983223|ref|XP_007363974.1|	protein DICSQDRAFT_55520 [Dichomitus squalens LYAD-421 SS1] >gi|395331040|gb|EJF63422.1| hypothetical protein DICSQDRAFT_55520 [Dichomitus squalens LYAD-421 SS1]	dsq:DICSQDRAFT_55520	hypothetical protein; K18167 succinate dehydrogenase assembly factor 1	--	--	--	gi|597983223|ref|XP_007363974.1|	protein DICSQDRAFT_55520 [Dichomitus squalens LYAD-421 SS1] >gi|395331040|gb|EJF63422.1| hypothetical protein DICSQDRAFT_55520 [Dichomitus squalens LYAD-421 SS1]	dsq:DICSQDRAFT_55520	hypothetical protein; K18167 succinate dehydrogenase assembly factor 1	--	--	--
GL16915-G	16.5167	80.74	2.28936	Up	0.878233	gi|691785830|emb|CDO77130.1|	protein BN946_scf184657.g5 [Trametes cinnabarina]	--	--	--	--	--	gi|691785830|emb|CDO77130.1|	protein BN946_scf184657.g5 [Trametes cinnabarina]	--	--	--	--	--
GL16966-G	20.21	91.07	2.17191	Up	0.871656	gi|598006725|ref|XP_007370012.1|	nonlysosomal ceramidase [Dichomitus squalens LYAD-421 SS1] >gi|395324850|gb|EJF57283.1| Neutral/alkaline nonlysosomal ceramidase [Dichomitus squalens LYAD-421 SS1]	dsq:DICSQDRAFT_69851	Neutral/alkaline nonlysosomal ceramidase; K12349 neutral ceramidase [EC:3.5.1.23]	--	--	--	gi|598006725|ref|XP_007370012.1|	nonlysosomal ceramidase [Dichomitus squalens LYAD-421 SS1] >gi|395324850|gb|EJF57283.1| Neutral/alkaline nonlysosomal ceramidase [Dichomitus squalens LYAD-421 SS1]	dsq:DICSQDRAFT_69851	Neutral/alkaline nonlysosomal ceramidase; K12349 neutral ceramidase [EC:3.5.1.23]	--	--	--
GL17007-G	4.04667	37.1467	3.19843	Up	0.869581	gi|597980749|ref|XP_007363332.1|	proteinase [Dichomitus squalens LYAD-421 SS1] >gi|395331233|gb|EJF63614.1| cysteine proteinase [Dichomitus squalens LYAD-421 SS1]	ppl:POSPLDRAFT_103833	hypothetical protein; K11844 ubiquitin carboxyl-terminal hydrolase 16/45 [EC:3.4.19.12]	--	--	--	gi|597980749|ref|XP_007363332.1|	proteinase [Dichomitus squalens LYAD-421 SS1] >gi|395331233|gb|EJF63614.1| cysteine proteinase [Dichomitus squalens LYAD-421 SS1]	ppl:POSPLDRAFT_103833	hypothetical protein; K11844 ubiquitin carboxyl-terminal hydrolase 16/45 [EC:3.4.19.12]	--	--	--
GL17012-G	132.757	1211.66	3.19012	Up	0.971905	gi|691794098|emb|CDO70834.1|	protein BN946_scf184801.g27 [Trametes cinnabarina]	--	--	--	--	--	gi|691794098|emb|CDO70834.1|	protein BN946_scf184801.g27 [Trametes cinnabarina]	--	--	--	--	--
GL17026-G	28.14	255.583	3.1831	Up	0.961231	gi|598001203|ref|XP_007368619.1|	protein DICSQDRAFT_90406 [Dichomitus squalens LYAD-421 SS1] >gi|395326180|gb|EJF58592.1| hypothetical protein DICSQDRAFT_90406 [Dichomitus squalens LYAD-421 SS1]	--	--	--	--	GO:0016021 integral component of membrane	gi|598001203|ref|XP_007368619.1|	protein DICSQDRAFT_90406 [Dichomitus squalens LYAD-421 SS1] >gi|395326180|gb|EJF58592.1| hypothetical protein DICSQDRAFT_90406 [Dichomitus squalens LYAD-421 SS1]	--	--	--	--	GO:0016021 integral component of membrane
GL17030-G	1.58667	21.3167	3.74791	Up	0.811566	gi|598001207|ref|XP_007368620.1|	protein DICSQDRAFT_182425 [Dichomitus squalens LYAD-421 SS1] >gi|395326181|gb|EJF58593.1| hypothetical protein DICSQDRAFT_182425 [Dichomitus squalens LYAD-421 SS1]	--	--	--	--	--	gi|598001207|ref|XP_007368620.1|	protein DICSQDRAFT_182425 [Dichomitus squalens LYAD-421 SS1] >gi|395326181|gb|EJF58593.1| hypothetical protein DICSQDRAFT_182425 [Dichomitus squalens LYAD-421 SS1]	--	--	--	--	--
GL17038-G	5.85667	37.59	2.6822	Up	0.846659	gi|598001125|ref|XP_007368598.1|	protein DICSQDRAFT_162810 [Dichomitus squalens LYAD-421 SS1] >gi|395326159|gb|EJF58571.1| hypothetical protein DICSQDRAFT_162810 [Dichomitus squalens LYAD-421 SS1]	--	--	--	--	--	gi|598001125|ref|XP_007368598.1|	protein DICSQDRAFT_162810 [Dichomitus squalens LYAD-421 SS1] >gi|395326159|gb|EJF58571.1| hypothetical protein DICSQDRAFT_162810 [Dichomitus squalens LYAD-421 SS1]	--	--	--	--	--
GL17042-G	305.14	51.44	-2.56851	Down	0.936432	gi|598001375|ref|XP_007368663.1|	2,3-dioxygenase [Dichomitus squalens LYAD-421 SS1] >gi|395326224|gb|EJF58636.1| Indoleamine 2,3-dioxygenase [Dichomitus squalens LYAD-421 SS1]	dsq:DICSQDRAFT_66685	Indoleamine 2,3-dioxygenase; K00463 indoleamine 2,3-dioxygenase [EC:1.13.11.52]	GO:0055114 oxidation-reduction process	GO:0020037 heme binding | GO:0051213 dioxygenase activity	--	gi|598001375|ref|XP_007368663.1|	2,3-dioxygenase [Dichomitus squalens LYAD-421 SS1] >gi|395326224|gb|EJF58636.1| Indoleamine 2,3-dioxygenase [Dichomitus squalens LYAD-421 SS1]	dsq:DICSQDRAFT_66685	Indoleamine 2,3-dioxygenase; K00463 indoleamine 2,3-dioxygenase [EC:1.13.11.52]	GO:0055114 oxidation-reduction process	GO:0020037 heme binding | GO:0051213 dioxygenase activity	--
GL17043-G	3.78667	27.1367	2.84124	Up	0.815544	gi|598001203|ref|XP_007368619.1|	protein DICSQDRAFT_90406 [Dichomitus squalens LYAD-421 SS1] >gi|395326180|gb|EJF58592.1| hypothetical protein DICSQDRAFT_90406 [Dichomitus squalens LYAD-421 SS1]	--	--	--	--	--	gi|598001203|ref|XP_007368619.1|	protein DICSQDRAFT_90406 [Dichomitus squalens LYAD-421 SS1] >gi|395326180|gb|EJF58592.1| hypothetical protein DICSQDRAFT_90406 [Dichomitus squalens LYAD-421 SS1]	--	--	--	--	--
GL17046-G	53.3167	512.81	3.26577	Up	0.970395	gi|598001403|ref|XP_007368670.1|	protein DICSQDRAFT_139271 [Dichomitus squalens LYAD-421 SS1] >gi|395326231|gb|EJF58643.1| hypothetical protein DICSQDRAFT_139271 [Dichomitus squalens LYAD-421 SS1]	--	--	--	--	--	gi|598001403|ref|XP_007368670.1|	protein DICSQDRAFT_139271 [Dichomitus squalens LYAD-421 SS1] >gi|395326231|gb|EJF58643.1| hypothetical protein DICSQDRAFT_139271 [Dichomitus squalens LYAD-421 SS1]	--	--	--	--	--
GL17065-G	12.0267	108.803	3.15756	Up	0.941749	--	--	--	--	--	--	--	--	--	--	--	--	--	--
GL17083-G	26.4767	281.837	3.41207	Up	0.968544	gi|691788807|emb|CDO75107.1|	protein BN946_scf185010.g32 [Trametes cinnabarina]	dsq:DICSQDRAFT_65514	ornithine decarboxylase; K01581 ornithine decarboxylase [EC:4.1.1.17]	GO:0006596 polyamine biosynthetic process	GO:0003824 catalytic activity	--	gi|691788807|emb|CDO75107.1|	protein BN946_scf185010.g32 [Trametes cinnabarina]	dsq:DICSQDRAFT_65514	ornithine decarboxylase; K01581 ornithine decarboxylase [EC:4.1.1.17]	GO:0006596 polyamine biosynthetic process	GO:0003824 catalytic activity	--
GL17117-G	88.93	270.75	1.60622	Up	0.814428	gi|636601274|ref|XP_008031805.1|	protein TRAVEDRAFT_25412 [Trametes versicolor FP-101664 SS1] >gi|392570948|gb|EIW64120.1| hypothetical protein TRAVEDRAFT_25412 [Trametes versicolor FP-101664 SS1]	--	--	--	--	--	gi|636601274|ref|XP_008031805.1|	protein TRAVEDRAFT_25412 [Trametes versicolor FP-101664 SS1] >gi|392570948|gb|EIW64120.1| hypothetical protein TRAVEDRAFT_25412 [Trametes versicolor FP-101664 SS1]	--	--	--	--	--
GL17140-G	308.317	2343.68	2.92629	Up	0.96391	gi|827762158|gb|KLO16767.1|	[Schizopora paradoxa]	cput:CONPUDRAFT_77984	P-loop containing nucleoside triphosphate hydrolase protein; K14572 midasin	--	--	--	gi|827762158|gb|KLO16767.1|	[Schizopora paradoxa]	cput:CONPUDRAFT_77984	P-loop containing nucleoside triphosphate hydrolase protein; K14572 midasin	--	--	--
GL17171-G	5.32	55.72	3.3887	Up	0.912551	gi|597991795|ref|XP_007366179.1|	protein DICSQDRAFT_136902 [Dichomitus squalens LYAD-421 SS1] >gi|395328568|gb|EJF60959.1| hypothetical protein DICSQDRAFT_136902 [Dichomitus squalens LYAD-421 SS1]	--	--	--	--	--	gi|597991795|ref|XP_007366179.1|	protein DICSQDRAFT_136902 [Dichomitus squalens LYAD-421 SS1] >gi|395328568|gb|EJF60959.1| hypothetical protein DICSQDRAFT_136902 [Dichomitus squalens LYAD-421 SS1]	--	--	--	--	--
GL17206-G	18.5967	101.447	2.44761	Up	0.902704	gi|597993843|ref|XP_007366720.1|	protein DICSQDRAFT_137407 [Dichomitus squalens LYAD-421 SS1] >gi|395328187|gb|EJF60581.1| hypothetical protein DICSQDRAFT_137407 [Dichomitus squalens LYAD-421 SS1]	--	--	--	--	--	gi|597993843|ref|XP_007366720.1|	protein DICSQDRAFT_137407 [Dichomitus squalens LYAD-421 SS1] >gi|395328187|gb|EJF60581.1| hypothetical protein DICSQDRAFT_137407 [Dichomitus squalens LYAD-421 SS1]	--	--	--	--	--
GL17207-G	150.44	41.13	-1.87093	Down	0.850361	gi|597998679|ref|XP_007367959.1|	protein DICSQDRAFT_89496, partial [Dichomitus squalens LYAD-421 SS1] >gi|395326972|gb|EJF59376.1| hypothetical protein DICSQDRAFT_89496, partial [Dichomitus squalens LYAD-421 SS1]	--	--	--	--	--	gi|597998679|ref|XP_007367959.1|	protein DICSQDRAFT_89496, partial [Dichomitus squalens LYAD-421 SS1] >gi|395326972|gb|EJF59376.1| hypothetical protein DICSQDRAFT_89496, partial [Dichomitus squalens LYAD-421 SS1]	--	--	--	--	--
GL17219-G	1253.1	179.25	-2.80546	Down	0.957897	--	--	--	--	--	--	--	--	--	--	--	--	--	--
GL17235-G	169.203	4.05667	-5.32423	Down	0.978128	gi|598006197|ref|XP_007369976.1|	protein DICSQDRAFT_183295 [Dichomitus squalens LYAD-421 SS1] >gi|395324814|gb|EJF57247.1| hypothetical protein DICSQDRAFT_183295 [Dichomitus squalens LYAD-421 SS1]	dsq:DICSQDRAFT_183295	hypothetical protein; K09780 uncharacterized protein	--	--	--	gi|598006197|ref|XP_007369976.1|	protein DICSQDRAFT_183295 [Dichomitus squalens LYAD-421 SS1] >gi|395324814|gb|EJF57247.1| hypothetical protein DICSQDRAFT_183295 [Dichomitus squalens LYAD-421 SS1]	dsq:DICSQDRAFT_183295	hypothetical protein; K09780 uncharacterized protein	--	--	--
GL17240-G	16.0433	70.51	2.13585	Up	0.855205	gi|597971913|ref|XP_007361071.1|	protein DICSQDRAFT_77624 [Dichomitus squalens LYAD-421 SS1] >gi|395333432|gb|EJF65809.1| hypothetical protein DICSQDRAFT_77624 [Dichomitus squalens LYAD-421 SS1]	dsq:DICSQDRAFT_77624	hypothetical protein; K02149 V-type H+-transporting ATPase subunit D	GO:0055085 transmembrane transport	GO:0042626 ATPase activity, coupled to transmembrane movement of substances	--	gi|597971913|ref|XP_007361071.1|	protein DICSQDRAFT_77624 [Dichomitus squalens LYAD-421 SS1] >gi|395333432|gb|EJF65809.1| hypothetical protein DICSQDRAFT_77624 [Dichomitus squalens LYAD-421 SS1]	dsq:DICSQDRAFT_77624	hypothetical protein; K02149 V-type H+-transporting ATPase subunit D	GO:0055085 transmembrane transport	GO:0042626 ATPase activity, coupled to transmembrane movement of substances	--
GL17248-G	18.7867	80.1733	2.09341	Up	0.858225	gi|597973377|ref|XP_007361441.1|	protein DICSQDRAFT_165877 [Dichomitus squalens LYAD-421 SS1] >gi|395333802|gb|EJF66179.1| hypothetical protein DICSQDRAFT_165877 [Dichomitus squalens LYAD-421 SS1]	dsq:DICSQDRAFT_165877	hypothetical protein; K01341 kexin [EC:3.4.21.61]	--	GO:0008236 serine-type peptidase activity	GO:0016020 membrane	gi|597973377|ref|XP_007361441.1|	protein DICSQDRAFT_165877 [Dichomitus squalens LYAD-421 SS1] >gi|395333802|gb|EJF66179.1| hypothetical protein DICSQDRAFT_165877 [Dichomitus squalens LYAD-421 SS1]	dsq:DICSQDRAFT_165877	hypothetical protein; K01341 kexin [EC:3.4.21.61]	--	GO:0008236 serine-type peptidase activity	GO:0016020 membrane
GL17251-G	7.23333	35.5367	2.29658	Up	0.810831	gi|597973481|ref|XP_007361468.1|	protein DICSQDRAFT_152188 [Dichomitus squalens LYAD-421 SS1] >gi|395333829|gb|EJF66206.1| hypothetical protein DICSQDRAFT_152188 [Dichomitus squalens LYAD-421 SS1]	--	--	--	--	--	gi|597973481|ref|XP_007361468.1|	protein DICSQDRAFT_152188 [Dichomitus squalens LYAD-421 SS1] >gi|395333829|gb|EJF66206.1| hypothetical protein DICSQDRAFT_152188 [Dichomitus squalens LYAD-421 SS1]	--	--	--	--	--
GL17256-G	52.3667	186.45	1.83207	Up	0.848064	gi|807748989|ref|XP_012179289.1|	protein [Fibroporia radiculosa] >gi|403413284|emb|CCL99984.1| predicted protein [Fibroporia radiculosa]	dsq:DICSQDRAFT_132324	hypothetical protein; K18749 protein LSM14	--	--	--	gi|807748989|ref|XP_012179289.1|	protein [Fibroporia radiculosa] >gi|403413284|emb|CCL99984.1| predicted protein [Fibroporia radiculosa]	dsq:DICSQDRAFT_132324	hypothetical protein; K18749 protein LSM14	--	--	--
GL17261-G	285.653	1482.73	2.37592	Up	0.93143	--	--	--	--	--	--	--	--	--	--	--	--	--	--
GL17273-G	7.73	36.4633	2.23791	Up	0.808415	gi|597973823|ref|XP_007361557.1|	protein DICSQDRAFT_177639 [Dichomitus squalens LYAD-421 SS1] >gi|395333918|gb|EJF66295.1| hypothetical protein DICSQDRAFT_177639 [Dichomitus squalens LYAD-421 SS1]	--	--	--	--	--	gi|597973823|ref|XP_007361557.1|	protein DICSQDRAFT_177639 [Dichomitus squalens LYAD-421 SS1] >gi|395333918|gb|EJF66295.1| hypothetical protein DICSQDRAFT_177639 [Dichomitus squalens LYAD-421 SS1]	--	--	--	--	--
GL17301-G	124.903	465.59	1.89825	Up	0.871183	gi|597974047|ref|XP_007361613.1|	protein DICSQDRAFT_177677 [Dichomitus squalens LYAD-421 SS1] >gi|395333974|gb|EJF66351.1| hypothetical protein DICSQDRAFT_177677 [Dichomitus squalens LYAD-421 SS1]	ppl:POSPLDRAFT_93794	hypothetical protein; K17263 cullin-associated NEDD8-dissociated protein 1	--	--	--	gi|597974047|ref|XP_007361613.1|	protein DICSQDRAFT_177677 [Dichomitus squalens LYAD-421 SS1] >gi|395333974|gb|EJF66351.1| hypothetical protein DICSQDRAFT_177677 [Dichomitus squalens LYAD-421 SS1]	ppl:POSPLDRAFT_93794	hypothetical protein; K17263 cullin-associated NEDD8-dissociated protein 1	--	--	--
GL17337-G	7.93	39.1867	2.30497	Up	0.821741	gi|597972261|ref|XP_007361159.1|	iminopeptidase [Dichomitus squalens LYAD-421 SS1] >gi|395333520|gb|EJF65897.1| proline iminopeptidase [Dichomitus squalens LYAD-421 SS1]	shs:STEHIDRAFT_69568	proline-specific peptidase; K18457 L-proline amide hydrolase [EC:3.5.1.101]	GO:0006508 proteolysis	GO:0008233 peptidase activity	--	gi|597972261|ref|XP_007361159.1|	iminopeptidase [Dichomitus squalens LYAD-421 SS1] >gi|395333520|gb|EJF65897.1| proline iminopeptidase [Dichomitus squalens LYAD-421 SS1]	shs:STEHIDRAFT_69568	proline-specific peptidase; K18457 L-proline amide hydrolase [EC:3.5.1.101]	GO:0006508 proteolysis	GO:0008233 peptidase activity	--
GL17339-G	46.7267	142.983	1.61353	Up	0.801851	gi|597972269|ref|XP_007361161.1|	protein DICSQDRAFT_77787 [Dichomitus squalens LYAD-421 SS1] >gi|395333522|gb|EJF65899.1| hypothetical protein DICSQDRAFT_77787 [Dichomitus squalens LYAD-421 SS1]	--	--	--	--	--	gi|597972269|ref|XP_007361161.1|	protein DICSQDRAFT_77787 [Dichomitus squalens LYAD-421 SS1] >gi|395333522|gb|EJF65899.1| hypothetical protein DICSQDRAFT_77787 [Dichomitus squalens LYAD-421 SS1]	--	--	--	--	--
GL17342-G	42.7867	172.973	2.01532	Up	0.876132	gi|597972495|ref|XP_007361218.1|	protein sorting 55 protein [Dichomitus squalens LYAD-421 SS1] >gi|395333579|gb|EJF65956.1| vacuolar protein sorting 55 protein [Dichomitus squalens LYAD-421 SS1]	--	--	--	--	GO:0016021 integral component of membrane	gi|597972495|ref|XP_007361218.1|	protein sorting 55 protein [Dichomitus squalens LYAD-421 SS1] >gi|395333579|gb|EJF65956.1| vacuolar protein sorting 55 protein [Dichomitus squalens LYAD-421 SS1]	--	--	--	--	GO:0016021 integral component of membrane
GL17346-G	20.23	73.8233	1.86758	Up	0.820769	gi|597972551|ref|XP_007361232.1|	protein DICSQDRAFT_159067 [Dichomitus squalens LYAD-421 SS1] >gi|395333593|gb|EJF65970.1| hypothetical protein DICSQDRAFT_159067 [Dichomitus squalens LYAD-421 SS1]	--	--	--	--	--	gi|597972551|ref|XP_007361232.1|	protein DICSQDRAFT_159067 [Dichomitus squalens LYAD-421 SS1] >gi|395333593|gb|EJF65970.1| hypothetical protein DICSQDRAFT_159067 [Dichomitus squalens LYAD-421 SS1]	--	--	--	--	--
GL17356-G	29.39	118.187	2.00767	Up	0.863988	gi|597972871|ref|XP_007361313.1|	protein DICSQDRAFT_78106 [Dichomitus squalens LYAD-421 SS1] >gi|395333674|gb|EJF66051.1| hypothetical protein DICSQDRAFT_78106 [Dichomitus squalens LYAD-421 SS1]	--	--	--	--	--	gi|597972871|ref|XP_007361313.1|	protein DICSQDRAFT_78106 [Dichomitus squalens LYAD-421 SS1] >gi|395333674|gb|EJF66051.1| hypothetical protein DICSQDRAFT_78106 [Dichomitus squalens LYAD-421 SS1]	--	--	--	--	--
GL17363-G	6.89	66.5767	3.27244	Up	0.921386	gi|597973115|ref|XP_007361375.1|	protein DICSQDRAFT_152111 [Dichomitus squalens LYAD-421 SS1] >gi|395333736|gb|EJF66113.1| hypothetical protein DICSQDRAFT_152111 [Dichomitus squalens LYAD-421 SS1]	--	--	--	--	--	gi|597973115|ref|XP_007361375.1|	protein DICSQDRAFT_152111 [Dichomitus squalens LYAD-421 SS1] >gi|395333736|gb|EJF66113.1| hypothetical protein DICSQDRAFT_152111 [Dichomitus squalens LYAD-421 SS1]	--	--	--	--	--
GL17377-G	46.7967	3.67333	-3.67124	Down	0.904792	gi|598003507|ref|XP_007369246.1|	dehydrogenase [Dichomitus squalens LYAD-421 SS1] >gi|395325578|gb|EJF57998.1| aryl-alcohol dehydrogenase [Dichomitus squalens LYAD-421 SS1]	aor:AOR_1_2094	AO090120000002; aryl-alcohol dehydrogenase; K17647 versiconal hemiacetal acetate reductase [EC:1.1.1.353]	--	--	--	gi|598003507|ref|XP_007369246.1|	dehydrogenase [Dichomitus squalens LYAD-421 SS1] >gi|395325578|gb|EJF57998.1| aryl-alcohol dehydrogenase [Dichomitus squalens LYAD-421 SS1]	aor:AOR_1_2094	AO090120000002; aryl-alcohol dehydrogenase; K17647 versiconal hemiacetal acetate reductase [EC:1.1.1.353]	--	--	--
GL17378-G	95.7133	14.87	-2.68632	Down	0.916122	gi|691793612|emb|CDO71406.1|	protein BN946_scf184908.g164 [Trametes cinnabarina]	--	--	--	--	--	gi|691793612|emb|CDO71406.1|	protein BN946_scf184908.g164 [Trametes cinnabarina]	--	--	--	--	--
GL17380-G	82.4267	9.13333	-3.1739	Down	0.929697	gi|598003489|ref|XP_007369239.1|	protein DICSQDRAFT_110888 [Dichomitus squalens LYAD-421 SS1] >gi|395325571|gb|EJF57991.1| hypothetical protein DICSQDRAFT_110888 [Dichomitus squalens LYAD-421 SS1]	--	--	--	--	--	gi|598003489|ref|XP_007369239.1|	protein DICSQDRAFT_110888 [Dichomitus squalens LYAD-421 SS1] >gi|395325571|gb|EJF57991.1| hypothetical protein DICSQDRAFT_110888 [Dichomitus squalens LYAD-421 SS1]	--	--	--	--	--
GL17399-G	29.25	164.557	2.49208	Up	0.920769	gi|598006827|ref|XP_007370042.1|	protein DICSQDRAFT_183332 [Dichomitus squalens LYAD-421 SS1] >gi|395324776|gb|EJF57210.1| hypothetical protein DICSQDRAFT_183332 [Dichomitus squalens LYAD-421 SS1]	--	--	--	--	--	gi|598006827|ref|XP_007370042.1|	protein DICSQDRAFT_183332 [Dichomitus squalens LYAD-421 SS1] >gi|395324776|gb|EJF57210.1| hypothetical protein DICSQDRAFT_183332 [Dichomitus squalens LYAD-421 SS1]	--	--	--	--	--
GL17415-G	18.4133	65.1233	1.82242	Up	0.804017	--	--	--	--	--	--	--	--	--	--	--	--	--	--
GL17453-G	22.7167	105.273	2.21232	Up	0.883169	gi|597986831|ref|XP_007364898.1|	protein DICSQDRAFT_161078 [Dichomitus squalens LYAD-421 SS1] >gi|395329801|gb|EJF62186.1| hypothetical protein DICSQDRAFT_161078 [Dichomitus squalens LYAD-421 SS1]	--	--	--	--	--	gi|597986831|ref|XP_007364898.1|	protein DICSQDRAFT_161078 [Dichomitus squalens LYAD-421 SS1] >gi|395329801|gb|EJF62186.1| hypothetical protein DICSQDRAFT_161078 [Dichomitus squalens LYAD-421 SS1]	--	--	--	--	--
GL17469-G	16.8533	65.1267	1.95021	Up	0.825181	gi|636627909|ref|XP_008045089.1|	protein TRAVEDRAFT_156671 [Trametes versicolor FP-101664 SS1] >gi|392558791|gb|EIW51977.1| hypothetical protein TRAVEDRAFT_156671 [Trametes versicolor FP-101664 SS1]	fme:FOMMEDRAFT_23654	hypothetical protein; K03469 ribonuclease HI [EC:3.1.26.4]	--	GO:0046872 metal ion binding | GO:0004519 endonuclease activity	--	gi|636627909|ref|XP_008045089.1|	protein TRAVEDRAFT_156671 [Trametes versicolor FP-101664 SS1] >gi|392558791|gb|EIW51977.1| hypothetical protein TRAVEDRAFT_156671 [Trametes versicolor FP-101664 SS1]	fme:FOMMEDRAFT_23654	hypothetical protein; K03469 ribonuclease HI [EC:3.1.26.4]	--	GO:0046872 metal ion binding | GO:0004519 endonuclease activity	--
GL17477-G	7.56333	39.9467	2.40098	Up	0.832834	gi|598008693|ref|XP_007370607.1|	protein DICSQDRAFT_150308 [Dichomitus squalens LYAD-421 SS1] >gi|395324210|gb|EJF56655.1| hypothetical protein DICSQDRAFT_150308 [Dichomitus squalens LYAD-421 SS1]	--	--	--	--	--	gi|598008693|ref|XP_007370607.1|	protein DICSQDRAFT_150308 [Dichomitus squalens LYAD-421 SS1] >gi|395324210|gb|EJF56655.1| hypothetical protein DICSQDRAFT_150308 [Dichomitus squalens LYAD-421 SS1]	--	--	--	--	--
GL17479-G	4.61667	41.17	3.15667	Up	0.878811	gi|598008705|ref|XP_007370610.1|	protein DICSQDRAFT_141102 [Dichomitus squalens LYAD-421 SS1] >gi|395324213|gb|EJF56658.1| hypothetical protein DICSQDRAFT_141102 [Dichomitus squalens LYAD-421 SS1]	--	--	--	--	--	gi|598008705|ref|XP_007370610.1|	protein DICSQDRAFT_141102 [Dichomitus squalens LYAD-421 SS1] >gi|395324213|gb|EJF56658.1| hypothetical protein DICSQDRAFT_141102 [Dichomitus squalens LYAD-421 SS1]	--	--	--	--	--
GL17484-G	20.51	0.646667	-4.98716	Down	0.82073	gi|598010065|ref|XP_007370934.1|	protein DICSQDRAFT_71736 [Dichomitus squalens LYAD-421 SS1] >gi|395323866|gb|EJF56320.1| hypothetical protein DICSQDRAFT_71736 [Dichomitus squalens LYAD-421 SS1]	dsq:DICSQDRAFT_184156	TFIIA-domain-containing protein; K03122 transcription initiation factor TFIIA large subunit	--	--	--	gi|598010065|ref|XP_007370934.1|	protein DICSQDRAFT_71736 [Dichomitus squalens LYAD-421 SS1] >gi|395323866|gb|EJF56320.1| hypothetical protein DICSQDRAFT_71736 [Dichomitus squalens LYAD-421 SS1]	dsq:DICSQDRAFT_184156	TFIIA-domain-containing protein; K03122 transcription initiation factor TFIIA large subunit	--	--	--
GL17497-G	20.32	78.3333	1.94673	Up	0.836917	gi|597994515|ref|XP_007366892.1|	protein DICSQDRAFT_107588 [Dichomitus squalens LYAD-421 SS1] >gi|395328079|gb|EJF60474.1| hypothetical protein DICSQDRAFT_107588 [Dichomitus squalens LYAD-421 SS1]	--	--	--	--	--	gi|597994515|ref|XP_007366892.1|	protein DICSQDRAFT_107588 [Dichomitus squalens LYAD-421 SS1] >gi|395328079|gb|EJF60474.1| hypothetical protein DICSQDRAFT_107588 [Dichomitus squalens LYAD-421 SS1]	--	--	--	--	--
GL17532-G	85.2833	253.35	1.5708	Up	0.804267	gi|597975867|ref|XP_007362090.1|	protein DICSQDRAFT_50422 [Dichomitus squalens LYAD-421 SS1] >gi|395333076|gb|EJF65454.1| hypothetical protein DICSQDRAFT_50422 [Dichomitus squalens LYAD-421 SS1]	dsq:DICSQDRAFT_50422	hypothetical protein; K06890 uncharacterized protein	--	--	GO:0016020 membrane	gi|597975867|ref|XP_007362090.1|	protein DICSQDRAFT_50422 [Dichomitus squalens LYAD-421 SS1] >gi|395333076|gb|EJF65454.1| hypothetical protein DICSQDRAFT_50422 [Dichomitus squalens LYAD-421 SS1]	dsq:DICSQDRAFT_50422	hypothetical protein; K06890 uncharacterized protein	--	--	GO:0016020 membrane
GL17540-G	18.77	65.6767	1.80695	Up	0.802796	gi|597975091|ref|XP_007361885.1|	protein DICSQDRAFT_159440 [Dichomitus squalens LYAD-421 SS1] >gi|395332871|gb|EJF65249.1| hypothetical protein DICSQDRAFT_159440 [Dichomitus squalens LYAD-421 SS1]	--	--	--	--	GO:0016021 integral component of membrane	gi|597975091|ref|XP_007361885.1|	protein DICSQDRAFT_159440 [Dichomitus squalens LYAD-421 SS1] >gi|395332871|gb|EJF65249.1| hypothetical protein DICSQDRAFT_159440 [Dichomitus squalens LYAD-421 SS1]	--	--	--	--	GO:0016021 integral component of membrane
GL17545-G	13.0833	111.973	3.09735	Up	0.940672	gi|597974929|ref|XP_007361842.1|	protein DICSQDRAFT_50709 [Dichomitus squalens LYAD-421 SS1] >gi|395332828|gb|EJF65206.1| hypothetical protein DICSQDRAFT_50709 [Dichomitus squalens LYAD-421 SS1]	--	--	--	--	--	gi|597974929|ref|XP_007361842.1|	protein DICSQDRAFT_50709 [Dichomitus squalens LYAD-421 SS1] >gi|395332828|gb|EJF65206.1| hypothetical protein DICSQDRAFT_50709 [Dichomitus squalens LYAD-421 SS1]	--	--	--	--	--
GL17563-G	27.9133	92.3533	1.72621	Up	0.808534	gi|598009279|ref|XP_007370741.1|	transporter [Dichomitus squalens LYAD-421 SS1] >gi|395324061|gb|EJF56509.1| oligopeptide transporter [Dichomitus squalens LYAD-421 SS1]	--	--	GO:0055085 transmembrane transport	GO:0051537 2 iron, 2 sulfur cluster binding	GO:0016021 integral component of membrane	gi|598009279|ref|XP_007370741.1|	transporter [Dichomitus squalens LYAD-421 SS1] >gi|395324061|gb|EJF56509.1| oligopeptide transporter [Dichomitus squalens LYAD-421 SS1]	--	--	GO:0055085 transmembrane transport	GO:0051537 2 iron, 2 sulfur cluster binding	GO:0016021 integral component of membrane
GL17564-G	6.88	38.7033	2.49198	Up	0.836747	gi|598009295|ref|XP_007370745.1|	protein DICSQDRAFT_113038 [Dichomitus squalens LYAD-421 SS1] >gi|395324065|gb|EJF56513.1| hypothetical protein DICSQDRAFT_113038 [Dichomitus squalens LYAD-421 SS1]	--	--	--	--	--	gi|598009295|ref|XP_007370745.1|	protein DICSQDRAFT_113038 [Dichomitus squalens LYAD-421 SS1] >gi|395324065|gb|EJF56513.1| hypothetical protein DICSQDRAFT_113038 [Dichomitus squalens LYAD-421 SS1]	--	--	--	--	--
GL17589-G	10.7167	84.11	2.95016	Up	0.922122	gi|597975725|ref|XP_007362054.1|	ribonucleo protein [Dichomitus squalens LYAD-421 SS1] >gi|395333040|gb|EJF65418.1| Sm-like ribonucleo protein [Dichomitus squalens LYAD-421 SS1]	dsq:DICSQDRAFT_50639	Sm-like ribonucleo protein; K11088 small nuclear ribonucleoprotein D3	GO:0006396 RNA processing	--	--	gi|597975725|ref|XP_007362054.1|	ribonucleo protein [Dichomitus squalens LYAD-421 SS1] >gi|395333040|gb|EJF65418.1| Sm-like ribonucleo protein [Dichomitus squalens LYAD-421 SS1]	dsq:DICSQDRAFT_50639	Sm-like ribonucleo protein; K11088 small nuclear ribonucleoprotein D3	GO:0006396 RNA processing	--	--
GL17600-G	21.0933	302.34	3.84131	Up	0.976684	gi|598012159|ref|XP_007371435.1|	protein DICSQDRAFT_113850 [Dichomitus squalens LYAD-421 SS1] >gi|395323346|gb|EJF55821.1| hypothetical protein DICSQDRAFT_113850 [Dichomitus squalens LYAD-421 SS1]	--	--	--	--	--	gi|598012159|ref|XP_007371435.1|	protein DICSQDRAFT_113850 [Dichomitus squalens LYAD-421 SS1] >gi|395323346|gb|EJF55821.1| hypothetical protein DICSQDRAFT_113850 [Dichomitus squalens LYAD-421 SS1]	--	--	--	--	--
GL17614-G	11.66	46.76	2.00371	Up	0.806065	gi|597974301|ref|XP_007361677.1|	translation initiation factor 3 subunit 8 [Dichomitus squalens LYAD-421 SS1] >gi|395332663|gb|EJF65041.1| eukaryotic translation initiation factor 3 subunit 8 [Dichomitus squalens LYAD-421 SS1]	dsq:DICSQDRAFT_124360	eukaryotic translation initiation factor 3 subunit 8; K03252 translation initiation factor 3 subunit C	GO:0001731 formation of translation preinitiation complex | GO:0006446 regulation of translational initiation	GO:0003743 translation initiation factor activity | GO:0031369 translation initiation factor binding	GO:0016282 eukaryotic 43S preinitiation complex | GO:0005852 eukaryotic translation initiation factor 3 complex | GO:0033290 eukaryotic 48S preinitiation complex	gi|597974301|ref|XP_007361677.1|	translation initiation factor 3 subunit 8 [Dichomitus squalens LYAD-421 SS1] >gi|395332663|gb|EJF65041.1| eukaryotic translation initiation factor 3 subunit 8 [Dichomitus squalens LYAD-421 SS1]	dsq:DICSQDRAFT_124360	eukaryotic translation initiation factor 3 subunit 8; K03252 translation initiation factor 3 subunit C	GO:0001731 formation of translation preinitiation complex | GO:0006446 regulation of translational initiation	GO:0003743 translation initiation factor activity | GO:0031369 translation initiation factor binding	GO:0016282 eukaryotic 43S preinitiation complex | GO:0005852 eukaryotic translation initiation factor 3 complex | GO:0033290 eukaryotic 48S preinitiation complex
GL17616-G	19.6867	83.5633	2.08565	Up	0.859997	gi|598005999|ref|XP_007369919.1|	transport v-snare protein vti1 [Dichomitus squalens LYAD-421 SS1] >gi|395324860|gb|EJF57292.1| vesicle transport v-snare protein vti1 [Dichomitus squalens LYAD-421 SS1]	dsq:DICSQDRAFT_183269	vesicle transport v-snare protein vti1; K08493 vesicle transport through interaction with t-SNAREs 1	GO:0016192 vesicle-mediated transport | GO:0006886 intracellular protein transport	--	GO:0016021 integral component of membrane | GO:0005622 intracellular	gi|598005999|ref|XP_007369919.1|	transport v-snare protein vti1 [Dichomitus squalens LYAD-421 SS1] >gi|395324860|gb|EJF57292.1| vesicle transport v-snare protein vti1 [Dichomitus squalens LYAD-421 SS1]	dsq:DICSQDRAFT_183269	vesicle transport v-snare protein vti1; K08493 vesicle transport through interaction with t-SNAREs 1	GO:0016192 vesicle-mediated transport | GO:0006886 intracellular protein transport	--	GO:0016021 integral component of membrane | GO:0005622 intracellular
GL17617-G	9.31333	45.1433	2.27714	Up	0.83437	gi|597974353|ref|XP_007361690.1|	protein DICSQDRAFT_132574 [Dichomitus squalens LYAD-421 SS1] >gi|395332676|gb|EJF65054.1| hypothetical protein DICSQDRAFT_132574 [Dichomitus squalens LYAD-421 SS1]	--	--	--	--	--	gi|597974353|ref|XP_007361690.1|	protein DICSQDRAFT_132574 [Dichomitus squalens LYAD-421 SS1] >gi|395332676|gb|EJF65054.1| hypothetical protein DICSQDRAFT_132574 [Dichomitus squalens LYAD-421 SS1]	--	--	--	--	--
GL17623-G	122.93	618.507	2.33095	Up	0.924301	gi|597975671|ref|XP_007362041.1|	carrier [Dichomitus squalens LYAD-421 SS1] >gi|395333027|gb|EJF65405.1| mitochondrial carrier [Dichomitus squalens LYAD-421 SS1]	wic:J056_003641	Peroxisome biosis protein 19-1; K13337 peroxin-19	--	--	GO:0016020 membrane	gi|597975671|ref|XP_007362041.1|	carrier [Dichomitus squalens LYAD-421 SS1] >gi|395333027|gb|EJF65405.1| mitochondrial carrier [Dichomitus squalens LYAD-421 SS1]	wic:J056_003641	Peroxisome biosis protein 19-1; K13337 peroxin-19	--	--	GO:0016020 membrane
GL17624-G	25.4667	120.217	2.23895	Up	0.891099	gi|597975587|ref|XP_007362019.1|	protein DICSQDRAFT_99172 [Dichomitus squalens LYAD-421 SS1] >gi|395333005|gb|EJF65383.1| hypothetical protein DICSQDRAFT_99172 [Dichomitus squalens LYAD-421 SS1]	--	--	GO:0008152 metabolic process	--	--	gi|597975587|ref|XP_007362019.1|	protein DICSQDRAFT_99172 [Dichomitus squalens LYAD-421 SS1] >gi|395333005|gb|EJF65383.1| hypothetical protein DICSQDRAFT_99172 [Dichomitus squalens LYAD-421 SS1]	--	--	GO:0008152 metabolic process	--	--
GL17628-G	19.2033	88.4233	2.20307	Up	0.873979	gi|597975463|ref|XP_007361985.1|	protein DICSQDRAFT_99096 [Dichomitus squalens LYAD-421 SS1] >gi|395332971|gb|EJF65349.1| hypothetical protein DICSQDRAFT_99096 [Dichomitus squalens LYAD-421 SS1]	--	--	--	--	--	gi|597975463|ref|XP_007361985.1|	protein DICSQDRAFT_99096 [Dichomitus squalens LYAD-421 SS1] >gi|395332971|gb|EJF65349.1| hypothetical protein DICSQDRAFT_99096 [Dichomitus squalens LYAD-421 SS1]	--	--	--	--	--
GL17629-G	36.6567	196.923	2.42549	Up	0.91989	gi|636606827|ref|XP_008034548.1|	protein TRAVEDRAFT_69397 [Trametes versicolor FP-101664 SS1] >gi|392570198|gb|EIW63371.1| hypothetical protein TRAVEDRAFT_69397 [Trametes versicolor FP-101664 SS1]	--	--	--	--	--	gi|636606827|ref|XP_008034548.1|	protein TRAVEDRAFT_69397 [Trametes versicolor FP-101664 SS1] >gi|392570198|gb|EIW63371.1| hypothetical protein TRAVEDRAFT_69397 [Trametes versicolor FP-101664 SS1]	--	--	--	--	--
GL17635-G	72.4033	640.873	3.14591	Up	0.96794	gi|597975533|ref|XP_007362005.1|	rab acceptor PRA1 [Dichomitus squalens LYAD-421 SS1] >gi|395332991|gb|EJF65369.1| prenylated rab acceptor PRA1 [Dichomitus squalens LYAD-421 SS1]	dsq:DICSQDRAFT_132958	prenylated rab acceptor PRA1; K20359 PRA1 family protein 1	--	--	GO:0016021 integral component of membrane	gi|597975533|ref|XP_007362005.1|	rab acceptor PRA1 [Dichomitus squalens LYAD-421 SS1] >gi|395332991|gb|EJF65369.1| prenylated rab acceptor PRA1 [Dichomitus squalens LYAD-421 SS1]	dsq:DICSQDRAFT_132958	prenylated rab acceptor PRA1; K20359 PRA1 family protein 1	--	--	GO:0016021 integral component of membrane
GL17637-G	18.5	96.4	2.38151	Up	0.894512	gi|597975359|ref|XP_007361957.1|	[Dichomitus squalens LYAD-421 SS1] >gi|395332943|gb|EJF65321.1| kinase [Dichomitus squalens LYAD-421 SS1]	dsq:DICSQDRAFT_50575	kinase; K08294 mitogen-activated protein kinase kinase [EC:2.7.12.2]	GO:0016310 phosphorylation	GO:0016301 kinase activity | GO:0000166 nucleotide binding	--	gi|597975359|ref|XP_007361957.1|	[Dichomitus squalens LYAD-421 SS1] >gi|395332943|gb|EJF65321.1| kinase [Dichomitus squalens LYAD-421 SS1]	dsq:DICSQDRAFT_50575	kinase; K08294 mitogen-activated protein kinase kinase [EC:2.7.12.2]	GO:0016310 phosphorylation	GO:0016301 kinase activity | GO:0000166 nucleotide binding	--
GL17663-G	14.3667	56.1033	1.96536	Up	0.817041	gi|598000099|ref|XP_007368340.1|	protein DICSQDRAFT_182250 [Dichomitus squalens LYAD-421 SS1] >gi|395326459|gb|EJF58868.1| hypothetical protein DICSQDRAFT_182250 [Dichomitus squalens LYAD-421 SS1]	--	--	--	--	--	gi|598000099|ref|XP_007368340.1|	protein DICSQDRAFT_182250 [Dichomitus squalens LYAD-421 SS1] >gi|395326459|gb|EJF58868.1| hypothetical protein DICSQDRAFT_182250 [Dichomitus squalens LYAD-421 SS1]	--	--	--	--	--
GL17769-G	36.6833	197.867	2.43133	Up	0.919995	gi|636606915|ref|XP_008034592.1|	protein TRAVEDRAFT_69454 [Trametes versicolor FP-101664 SS1] >gi|392570274|gb|EIW63447.1| hypothetical protein TRAVEDRAFT_69454 [Trametes versicolor FP-101664 SS1]	--	--	--	--	--	gi|636606915|ref|XP_008034592.1|	protein TRAVEDRAFT_69454 [Trametes versicolor FP-101664 SS1] >gi|392570274|gb|EIW63447.1| hypothetical protein TRAVEDRAFT_69454 [Trametes versicolor FP-101664 SS1]	--	--	--	--	--
GL17785-G	8.17667	41.04	2.32745	Up	0.829841	gi|597994415|ref|XP_007366867.1|	protein DICSQDRAFT_107543 [Dichomitus squalens LYAD-421 SS1] >gi|395328054|gb|EJF60449.1| hypothetical protein DICSQDRAFT_107543 [Dichomitus squalens LYAD-421 SS1]	--	--	--	--	--	gi|597994415|ref|XP_007366867.1|	protein DICSQDRAFT_107543 [Dichomitus squalens LYAD-421 SS1] >gi|395328054|gb|EJF60449.1| hypothetical protein DICSQDRAFT_107543 [Dichomitus squalens LYAD-421 SS1]	--	--	--	--	--
GL17794-G	25.5333	111.237	2.12318	Up	0.875542	gi|636605383|ref|XP_008033826.1|	protein TRAVEDRAFT_43372 [Trametes versicolor FP-101664 SS1] >gi|392569889|gb|EIW63062.1| hypothetical protein TRAVEDRAFT_43372 [Trametes versicolor FP-101664 SS1]	dsq:DICSQDRAFT_79005	hypothetical protein; K20815 N-terminal acetyltransferase 2	--	--	GO:0016020 membrane	gi|636605383|ref|XP_008033826.1|	protein TRAVEDRAFT_43372 [Trametes versicolor FP-101664 SS1] >gi|392569889|gb|EIW63062.1| hypothetical protein TRAVEDRAFT_43372 [Trametes versicolor FP-101664 SS1]	dsq:DICSQDRAFT_79005	hypothetical protein; K20815 N-terminal acetyltransferase 2	--	--	GO:0016020 membrane
GL17797-G	11.78	73.47	2.64082	Up	0.90067	gi|597974623|ref|XP_007361759.1|	protein DICSQDRAFT_177783, partial [Dichomitus squalens LYAD-421 SS1] >gi|395332745|gb|EJF65123.1| hypothetical protein DICSQDRAFT_177783, partial [Dichomitus squalens LYAD-421 SS1]	--	--	--	--	--	gi|597974623|ref|XP_007361759.1|	protein DICSQDRAFT_177783, partial [Dichomitus squalens LYAD-421 SS1] >gi|395332745|gb|EJF65123.1| hypothetical protein DICSQDRAFT_177783, partial [Dichomitus squalens LYAD-421 SS1]	--	--	--	--	--
GL17799-G	28.7033	3.52333	-3.02621	Down	0.831377	gi|749900162|gb|KIJ67700.1|	protein HYDPIDRAFT_83790 [Hydnomerulius pinastri MD-312]	--	--	--	--	--	gi|749900162|gb|KIJ67700.1|	protein HYDPIDRAFT_83790 [Hydnomerulius pinastri MD-312]	--	--	--	--	--
GL17800-G	4.87667	33.1133	2.76344	Up	0.836655	gi|597974673|ref|XP_007361772.1|	protein [Dichomitus squalens LYAD-421 SS1] >gi|395332758|gb|EJF65136.1| RhoGAP-domain-containing protein [Dichomitus squalens LYAD-421 SS1]	act:ACLA_088180	RhoGAP domain protein; K08773 RalA-binding protein 1	--	--	--	gi|597974673|ref|XP_007361772.1|	protein [Dichomitus squalens LYAD-421 SS1] >gi|395332758|gb|EJF65136.1| RhoGAP-domain-containing protein [Dichomitus squalens LYAD-421 SS1]	act:ACLA_088180	RhoGAP domain protein; K08773 RalA-binding protein 1	--	--	--
GL17807-G	8.03333	43.59	2.43993	Up	0.845136	gi|597974389|ref|XP_007361700.1|	protein DICSQDRAFT_132582 [Dichomitus squalens LYAD-421 SS1] >gi|395332686|gb|EJF65064.1| hypothetical protein DICSQDRAFT_132582 [Dichomitus squalens LYAD-421 SS1]	--	--	--	--	--	gi|597974389|ref|XP_007361700.1|	protein DICSQDRAFT_132582 [Dichomitus squalens LYAD-421 SS1] >gi|395332686|gb|EJF65064.1| hypothetical protein DICSQDRAFT_132582 [Dichomitus squalens LYAD-421 SS1]	--	--	--	--	--
GL17814-G	10922.1	3892.84	-1.48836	Down	0.800683	gi|598004745|ref|XP_007369579.1|	protein DICSQDRAFT_68969, partial [Dichomitus squalens LYAD-421 SS1] >gi|395325181|gb|EJF57607.1| hypothetical protein DICSQDRAFT_68969, partial [Dichomitus squalens LYAD-421 SS1]	--	--	--	--	--	gi|598004745|ref|XP_007369579.1|	protein DICSQDRAFT_68969, partial [Dichomitus squalens LYAD-421 SS1] >gi|395325181|gb|EJF57607.1| hypothetical protein DICSQDRAFT_68969, partial [Dichomitus squalens LYAD-421 SS1]	--	--	--	--	--
GL17824-G	15.9467	168.95	3.40527	Up	0.960719	gi|636606221|ref|XP_008034245.1|	protein TRAVEDRAFT_62810 [Trametes versicolor FP-101664 SS1] >gi|392569987|gb|EIW63160.1| hypothetical protein TRAVEDRAFT_62810 [Trametes versicolor FP-101664 SS1]	--	--	--	--	--	gi|636606221|ref|XP_008034245.1|	protein TRAVEDRAFT_62810 [Trametes versicolor FP-101664 SS1] >gi|392569987|gb|EIW63160.1| hypothetical protein TRAVEDRAFT_62810 [Trametes versicolor FP-101664 SS1]	--	--	--	--	--
GL17831-G	10.1733	153.82	3.91838	Up	0.967336	--	--	--	--	--	--	--	--	--	--	--	--	--	--
GL17841-G	8.74	112.36	3.68435	Up	0.955665	gi|807751903|ref|XP_012180746.1|	protein [Fibroporia radiculosa] >gi|403414763|emb|CCM01463.1| predicted protein [Fibroporia radiculosa]	pco:PHACADRAFT_258323	hypothetical protein; K01772 protoporphyrin/coproporphyrin ferrochelatase [EC:4.99.1.1 4.99.1.9]	GO:0006783 heme biosynthetic process	GO:0004325 ferrochelatase activity	--	gi|807751903|ref|XP_012180746.1|	protein [Fibroporia radiculosa] >gi|403414763|emb|CCM01463.1| predicted protein [Fibroporia radiculosa]	pco:PHACADRAFT_258323	hypothetical protein; K01772 protoporphyrin/coproporphyrin ferrochelatase [EC:4.99.1.1 4.99.1.9]	GO:0006783 heme biosynthetic process	GO:0004325 ferrochelatase activity	--
GL17874-G	16.2233	61.4133	1.92048	Up	0.815794	gi|597978003|ref|XP_007362633.1|	protein DICSQDRAFT_133548 [Dichomitus squalens LYAD-421 SS1] >gi|395332458|gb|EJF64837.1| hypothetical protein DICSQDRAFT_133548 [Dichomitus squalens LYAD-421 SS1]	--	--	--	GO:0005488 binding	--	gi|597978003|ref|XP_007362633.1|	protein DICSQDRAFT_133548 [Dichomitus squalens LYAD-421 SS1] >gi|395332458|gb|EJF64837.1| hypothetical protein DICSQDRAFT_133548 [Dichomitus squalens LYAD-421 SS1]	--	--	--	GO:0005488 binding	--
GL17882-G	3.72	35.7933	3.26632	Up	0.867559	gi|597977139|ref|XP_007362413.1|	general substrate transporter [Dichomitus squalens LYAD-421 SS1] >gi|395332238|gb|EJF64617.1| MFS general substrate transporter [Dichomitus squalens LYAD-421 SS1]	--	--	--	--	GO:0016020 membrane	gi|597977139|ref|XP_007362413.1|	general substrate transporter [Dichomitus squalens LYAD-421 SS1] >gi|395332238|gb|EJF64617.1| MFS general substrate transporter [Dichomitus squalens LYAD-421 SS1]	--	--	--	--	GO:0016020 membrane
GL17905-G	4.45	30.3767	2.77109	Up	0.826782	gi|597977461|ref|XP_007362496.1|	protein DICSQDRAFT_144448 [Dichomitus squalens LYAD-421 SS1] >gi|395332321|gb|EJF64700.1| hypothetical protein DICSQDRAFT_144448 [Dichomitus squalens LYAD-421 SS1]	--	--	--	--	--	gi|597977461|ref|XP_007362496.1|	protein DICSQDRAFT_144448 [Dichomitus squalens LYAD-421 SS1] >gi|395332321|gb|EJF64700.1| hypothetical protein DICSQDRAFT_144448 [Dichomitus squalens LYAD-421 SS1]	--	--	--	--	--
GL17910-G	112.9	382.28	1.75958	Up	0.847066	--	--	--	--	--	--	--	--	--	--	--	--	--	--
GL17916-G	23.01	225.457	3.29252	Up	0.962334	gi|597976571|ref|XP_007362268.1|	protein DICSQDRAFT_52495 [Dichomitus squalens LYAD-421 SS1] >gi|395332093|gb|EJF64472.1| hypothetical protein DICSQDRAFT_52495 [Dichomitus squalens LYAD-421 SS1]	--	--	--	--	GO:0016020 membrane	gi|597976571|ref|XP_007362268.1|	protein DICSQDRAFT_52495 [Dichomitus squalens LYAD-421 SS1] >gi|395332093|gb|EJF64472.1| hypothetical protein DICSQDRAFT_52495 [Dichomitus squalens LYAD-421 SS1]	--	--	--	--	GO:0016020 membrane
GL17926-G	145.697	452.687	1.63554	Up	0.827084	gi|691794308|emb|CDO70639.1|	protein BN946_scf184756.g5 [Trametes cinnabarina]	lbc:LACBIDRAFT_184142	hypothetical protein; K18586 ubiquinone biosynthesis protein COQ4	GO:0006744 ubiquinone biosynthetic process	--	GO:0005743 mitochondrial inner membrane	gi|691794308|emb|CDO70639.1|	protein BN946_scf184756.g5 [Trametes cinnabarina]	lbc:LACBIDRAFT_184142	hypothetical protein; K18586 ubiquinone biosynthesis protein COQ4	GO:0006744 ubiquinone biosynthetic process	--	GO:0005743 mitochondrial inner membrane
GL17930-G	3.93	49.2533	3.64762	Up	0.908612	gi|597978235|ref|XP_007362691.1|	protein [Dichomitus squalens LYAD-421 SS1] >gi|395332516|gb|EJF64895.1| subtilisin-like protein [Dichomitus squalens LYAD-421 SS1]	dsq:DICSQDRAFT_52085	subtilisin-like protein; K01279 tripeptidyl-peptidase I [EC:3.4.14.9]	--	--	--	gi|597978235|ref|XP_007362691.1|	protein [Dichomitus squalens LYAD-421 SS1] >gi|395332516|gb|EJF64895.1| subtilisin-like protein [Dichomitus squalens LYAD-421 SS1]	dsq:DICSQDRAFT_52085	subtilisin-like protein; K01279 tripeptidyl-peptidase I [EC:3.4.14.9]	--	--	--
GL17933-G	25.2733	89.7567	1.8284	Up	0.824275	gi|597978149|ref|XP_007362670.1|	protein DICSQDRAFT_52710 [Dichomitus squalens LYAD-421 SS1] >gi|395332495|gb|EJF64874.1| hypothetical protein DICSQDRAFT_52710 [Dichomitus squalens LYAD-421 SS1]	--	--	--	GO:0046872 metal ion binding | GO:0000166 nucleotide binding | GO:0003723 RNA binding	--	gi|597978149|ref|XP_007362670.1|	protein DICSQDRAFT_52710 [Dichomitus squalens LYAD-421 SS1] >gi|395332495|gb|EJF64874.1| hypothetical protein DICSQDRAFT_52710 [Dichomitus squalens LYAD-421 SS1]	--	--	--	GO:0046872 metal ion binding | GO:0000166 nucleotide binding | GO:0003723 RNA binding	--
GL17942-G	17.4767	78.9233	2.17502	Up	0.866916	gi|597981593|ref|XP_007363545.1|	protein DICSQDRAFT_160331 [Dichomitus squalens LYAD-421 SS1] >gi|395331446|gb|EJF63827.1| hypothetical protein DICSQDRAFT_160331 [Dichomitus squalens LYAD-421 SS1]	--	--	--	--	--	gi|597981593|ref|XP_007363545.1|	protein DICSQDRAFT_160331 [Dichomitus squalens LYAD-421 SS1] >gi|395331446|gb|EJF63827.1| hypothetical protein DICSQDRAFT_160331 [Dichomitus squalens LYAD-421 SS1]	--	--	--	--	--
GL17945-G	105.413	454.743	2.109	Up	0.900263	gi|597978399|ref|XP_007362732.1|	protein DICSQDRAFT_100420 [Dichomitus squalens LYAD-421 SS1] >gi|395332557|gb|EJF64936.1| hypothetical protein DICSQDRAFT_100420 [Dichomitus squalens LYAD-421 SS1]	--	--	--	--	--	gi|597978399|ref|XP_007362732.1|	protein DICSQDRAFT_100420 [Dichomitus squalens LYAD-421 SS1] >gi|395332557|gb|EJF64936.1| hypothetical protein DICSQDRAFT_100420 [Dichomitus squalens LYAD-421 SS1]	--	--	--	--	--
GL17948-G	20.6767	86.0933	2.0579	Up	0.857503	gi|242223572|ref|XP_002477393.1|	protein [Postia placenta Mad-698-R] >gi|220723071|gb|EED77409.1| predicted protein [Postia placenta Mad-698-R]	--	--	--	--	--	gi|242223572|ref|XP_002477393.1|	protein [Postia placenta Mad-698-R] >gi|220723071|gb|EED77409.1| predicted protein [Postia placenta Mad-698-R]	--	--	--	--	--
GL17954-G	8.47667	66.8767	2.97993	Up	0.911199	gi|597978563|ref|XP_007362773.1|	protein DICSQDRAFT_52749 [Dichomitus squalens LYAD-421 SS1] >gi|395332598|gb|EJF64977.1| hypothetical protein DICSQDRAFT_52749 [Dichomitus squalens LYAD-421 SS1]	--	--	--	--	--	gi|597978563|ref|XP_007362773.1|	protein DICSQDRAFT_52749 [Dichomitus squalens LYAD-421 SS1] >gi|395332598|gb|EJF64977.1| hypothetical protein DICSQDRAFT_52749 [Dichomitus squalens LYAD-421 SS1]	--	--	--	--	--
GL17962-G	71.2567	254.147	1.83456	Up	0.853131	gi|597976849|ref|XP_007362339.1|	protein DICSQDRAFT_166703 [Dichomitus squalens LYAD-421 SS1] >gi|395332164|gb|EJF64543.1| hypothetical protein DICSQDRAFT_166703 [Dichomitus squalens LYAD-421 SS1]	dsq:DICSQDRAFT_166703	hypothetical protein; K02153 V-type H+-transporting ATPase subunit e	GO:0015991 ATP hydrolysis coupled proton transport	GO:0015078 hydrogen ion transmembrane transporter activity	GO:0033179 proton-transporting V-type ATPase, V0 domain | GO:0016021 integral component of membrane	gi|597976849|ref|XP_007362339.1|	protein DICSQDRAFT_166703 [Dichomitus squalens LYAD-421 SS1] >gi|395332164|gb|EJF64543.1| hypothetical protein DICSQDRAFT_166703 [Dichomitus squalens LYAD-421 SS1]	dsq:DICSQDRAFT_166703	hypothetical protein; K02153 V-type H+-transporting ATPase subunit e	GO:0015991 ATP hydrolysis coupled proton transport	GO:0015078 hydrogen ion transmembrane transporter activity	GO:0033179 proton-transporting V-type ATPase, V0 domain | GO:0016021 integral component of membrane
GL17965-G	19.9367	94.4667	2.24438	Up	0.881108	gi|597976727|ref|XP_007362308.1|	protein DICSQDRAFT_159660 [Dichomitus squalens LYAD-421 SS1] >gi|395332133|gb|EJF64512.1| hypothetical protein DICSQDRAFT_159660 [Dichomitus squalens LYAD-421 SS1]	--	--	--	--	--	gi|597976727|ref|XP_007362308.1|	protein DICSQDRAFT_159660 [Dichomitus squalens LYAD-421 SS1] >gi|395332133|gb|EJF64512.1| hypothetical protein DICSQDRAFT_159660 [Dichomitus squalens LYAD-421 SS1]	--	--	--	--	--
GL17968-G	45.9533	147.463	1.68211	Up	0.817264	gi|597976917|ref|XP_007362356.1|	protein DICSQDRAFT_152834 [Dichomitus squalens LYAD-421 SS1] >gi|395332181|gb|EJF64560.1| hypothetical protein DICSQDRAFT_152834 [Dichomitus squalens LYAD-421 SS1]	--	--	--	--	--	gi|597976917|ref|XP_007362356.1|	protein DICSQDRAFT_152834 [Dichomitus squalens LYAD-421 SS1] >gi|395332181|gb|EJF64560.1| hypothetical protein DICSQDRAFT_152834 [Dichomitus squalens LYAD-421 SS1]	--	--	--	--	--
GL18101-G	23.83	216.127	3.18103	Up	0.958671	--	--	--	--	--	--	--	--	--	--	--	--	--	--
GL18108-G	8.02	39.6333	2.30504	Up	0.823815	gi|597984497|ref|XP_007364296.1|	protein [Dichomitus squalens LYAD-421 SS1] >gi|395330567|gb|EJF62950.1| rhomboid-domain-containing protein [Dichomitus squalens LYAD-421 SS1]	fme:FOMMEDRAFT_125677	rhomboid-domain-containing protein; K09650 rhomboid-like protein [EC:3.4.21.105]	--	--	--	gi|597984497|ref|XP_007364296.1|	protein [Dichomitus squalens LYAD-421 SS1] >gi|395330567|gb|EJF62950.1| rhomboid-domain-containing protein [Dichomitus squalens LYAD-421 SS1]	fme:FOMMEDRAFT_125677	rhomboid-domain-containing protein; K09650 rhomboid-like protein [EC:3.4.21.105]	--	--	--
GL18126-G	101.957	801.883	2.97544	Up	0.962991	gi|597983945|ref|XP_007364156.1|	P450 [Dichomitus squalens LYAD-421 SS1] >gi|395330427|gb|EJF62810.1| cytochrome P450 [Dichomitus squalens LYAD-421 SS1]	pic:PICST_35590	ALK2; n-alkane inducible cytochrome P- 450; K00493 unspecific monooxygenase [EC:1.14.14.1]	--	--	--	gi|597983945|ref|XP_007364156.1|	P450 [Dichomitus squalens LYAD-421 SS1] >gi|395330427|gb|EJF62810.1| cytochrome P450 [Dichomitus squalens LYAD-421 SS1]	pic:PICST_35590	ALK2; n-alkane inducible cytochrome P- 450; K00493 unspecific monooxygenase [EC:1.14.14.1]	--	--	--
GL18127-G	23.7233	131.367	2.46922	Up	0.913929	gi|597984061|ref|XP_007364185.1|	protein DICSQDRAFT_135104 [Dichomitus squalens LYAD-421 SS1] >gi|395330456|gb|EJF62839.1| hypothetical protein DICSQDRAFT_135104 [Dichomitus squalens LYAD-421 SS1]	--	--	--	--	--	gi|597984061|ref|XP_007364185.1|	protein DICSQDRAFT_135104 [Dichomitus squalens LYAD-421 SS1] >gi|395330456|gb|EJF62839.1| hypothetical protein DICSQDRAFT_135104 [Dichomitus squalens LYAD-421 SS1]	--	--	--	--	--
GL18134-G	42.54	357.453	3.07086	Up	0.961087	gi|597983901|ref|XP_007364145.1|	family 2 protein [Dichomitus squalens LYAD-421 SS1] >gi|395330416|gb|EJF62799.1| glycosyltransferase family 2 protein [Dichomitus squalens LYAD-421 SS1]	dsq:DICSQDRAFT_103043	glycosyltransferase family 2 protein; K00698 chitin synthase [EC:2.4.1.16]	GO:0006031 chitin biosynthetic process	GO:0004100 chitin synthase activity	GO:0016021 integral component of membrane	gi|597983901|ref|XP_007364145.1|	family 2 protein [Dichomitus squalens LYAD-421 SS1] >gi|395330416|gb|EJF62799.1| glycosyltransferase family 2 protein [Dichomitus squalens LYAD-421 SS1]	dsq:DICSQDRAFT_103043	glycosyltransferase family 2 protein; K00698 chitin synthase [EC:2.4.1.16]	GO:0006031 chitin biosynthetic process	GO:0004100 chitin synthase activity	GO:0016021 integral component of membrane
GL18142-G	11.2033	67.78	2.59693	Up	0.89316	gi|597996059|ref|XP_007367288.1|	protein DICSQDRAFT_171559 [Dichomitus squalens LYAD-421 SS1] >gi|395327677|gb|EJF60075.1| hypothetical protein DICSQDRAFT_171559 [Dichomitus squalens LYAD-421 SS1]	--	--	--	--	--	gi|597996059|ref|XP_007367288.1|	protein DICSQDRAFT_171559 [Dichomitus squalens LYAD-421 SS1] >gi|395327677|gb|EJF60075.1| hypothetical protein DICSQDRAFT_171559 [Dichomitus squalens LYAD-421 SS1]	--	--	--	--	--
GL18160-G	19.31	109.447	2.50281	Up	0.909531	gi|597985027|ref|XP_007364432.1|	protein [Dichomitus squalens LYAD-421 SS1] >gi|395330703|gb|EJF63086.1| cyclin-domain-containing protein [Dichomitus squalens LYAD-421 SS1]	mbe:MBM_09112	metallopeptidase family M24; K14213 Xaa-Pro dipeptidase [EC:3.4.13.9]	--	--	--	gi|597985027|ref|XP_007364432.1|	protein [Dichomitus squalens LYAD-421 SS1] >gi|395330703|gb|EJF63086.1| cyclin-domain-containing protein [Dichomitus squalens LYAD-421 SS1]	mbe:MBM_09112	metallopeptidase family M24; K14213 Xaa-Pro dipeptidase [EC:3.4.13.9]	--	--	--
GL18163-G	71.3233	915.717	3.68246	Up	0.981856	gi|636607493|ref|XP_008034881.1|	protein TRAVEDRAFT_27567 [Trametes versicolor FP-101664 SS1] >gi|392569068|gb|EIW62242.1| hypothetical protein TRAVEDRAFT_27567 [Trametes versicolor FP-101664 SS1]	lbc:LACBIDRAFT_302160	hypothetical protein; K05747 Wiskott-Aldrich syndrome protein	--	--	--	gi|636607493|ref|XP_008034881.1|	protein TRAVEDRAFT_27567 [Trametes versicolor FP-101664 SS1] >gi|392569068|gb|EIW62242.1| hypothetical protein TRAVEDRAFT_27567 [Trametes versicolor FP-101664 SS1]	lbc:LACBIDRAFT_302160	hypothetical protein; K05747 Wiskott-Aldrich syndrome protein	--	--	--
GL18165-G	98.8133	20.9	-2.2412	Down	0.882959	gi|597984969|ref|XP_007364417.1|	ribosomal protein L18 [Dichomitus squalens LYAD-421 SS1] >gi|395330688|gb|EJF63071.1| 60S ribosomal protein L18 [Dichomitus squalens LYAD-421 SS1]	dsq:DICSQDRAFT_103584	60S ribosomal protein L18; K02883 large subunit ribosomal protein L18e	GO:0006412 translation	GO:0003735 structural constituent of ribosome	GO:0005840 ribosome	gi|597984969|ref|XP_007364417.1|	ribosomal protein L18 [Dichomitus squalens LYAD-421 SS1] >gi|395330688|gb|EJF63071.1| 60S ribosomal protein L18 [Dichomitus squalens LYAD-421 SS1]	dsq:DICSQDRAFT_103584	60S ribosomal protein L18; K02883 large subunit ribosomal protein L18e	GO:0006412 translation	GO:0003735 structural constituent of ribosome	GO:0005840 ribosome
GL18169-G	10.6933	45.9733	2.10409	Up	0.817776	gi|597984865|ref|XP_007364391.1|	protein [Dichomitus squalens LYAD-421 SS1] >gi|395330662|gb|EJF63045.1| Nop-domain-containing protein [Dichomitus squalens LYAD-421 SS1]	dsq:DICSQDRAFT_103532	Nop-domain-containing protein; K14565 nucleolar protein 58	--	--	--	gi|597984865|ref|XP_007364391.1|	protein [Dichomitus squalens LYAD-421 SS1] >gi|395330662|gb|EJF63045.1| Nop-domain-containing protein [Dichomitus squalens LYAD-421 SS1]	dsq:DICSQDRAFT_103532	Nop-domain-containing protein; K14565 nucleolar protein 58	--	--	--
GL18222-G	37.63	118.187	1.65111	Up	0.804739	gi|598008441|ref|XP_007370549.1|	protein [Dichomitus squalens LYAD-421 SS1] >gi|395324242|gb|EJF56686.1| HET-domain-containing protein [Dichomitus squalens LYAD-421 SS1]	afv:AFLA_005130	L-lysine 2,3-aminomutase, putative; K01843 lysine 2,3-aminomutase [EC:5.4.3.2]	--	--	--	gi|598008441|ref|XP_007370549.1|	protein [Dichomitus squalens LYAD-421 SS1] >gi|395324242|gb|EJF56686.1| HET-domain-containing protein [Dichomitus squalens LYAD-421 SS1]	afv:AFLA_005130	L-lysine 2,3-aminomutase, putative; K01843 lysine 2,3-aminomutase [EC:5.4.3.2]	--	--	--
GL18246-G	13.32	58.0033	2.12254	Up	0.839254	gi|598002507|ref|XP_007368956.1|	protein DICSQDRAFT_17217, partial [Dichomitus squalens LYAD-421 SS1] >gi|395325860|gb|EJF58276.1| hypothetical protein DICSQDRAFT_17217, partial [Dichomitus squalens LYAD-421 SS1]	shs:STEHIDRAFT_141845	galactose mutarotase-like protein; K18195 rhamnogalacturonan endolyase [EC:4.2.2.23]	--	--	--	gi|598002507|ref|XP_007368956.1|	protein DICSQDRAFT_17217, partial [Dichomitus squalens LYAD-421 SS1] >gi|395325860|gb|EJF58276.1| hypothetical protein DICSQDRAFT_17217, partial [Dichomitus squalens LYAD-421 SS1]	shs:STEHIDRAFT_141845	galactose mutarotase-like protein; K18195 rhamnogalacturonan endolyase [EC:4.2.2.23]	--	--	--
GL18284-G	35.96	119.973	1.73825	Up	0.821754	gi|597996337|ref|XP_007367359.1|	protein DICSQDRAFT_148228 [Dichomitus squalens LYAD-421 SS1] >gi|395327497|gb|EJF59896.1| hypothetical protein DICSQDRAFT_148228 [Dichomitus squalens LYAD-421 SS1]	--	--	--	--	--	gi|597996337|ref|XP_007367359.1|	protein DICSQDRAFT_148228 [Dichomitus squalens LYAD-421 SS1] >gi|395327497|gb|EJF59896.1| hypothetical protein DICSQDRAFT_148228 [Dichomitus squalens LYAD-421 SS1]	--	--	--	--	--
GL18287-G	356.087	1500.05	2.07471	Up	0.901549	gi|597986747|ref|XP_007364877.1|	protease [Dichomitus squalens LYAD-421 SS1] >gi|395329780|gb|EJF62165.1| acid protease [Dichomitus squalens LYAD-421 SS1]	ncr:NCU00994	endothiapepsin; K06004 aspergillopepsin I [EC:3.4.23.18]	GO:0006508 proteolysis	GO:0004190 aspartic-type endopeptidase activity	--	gi|597986747|ref|XP_007364877.1|	protease [Dichomitus squalens LYAD-421 SS1] >gi|395329780|gb|EJF62165.1| acid protease [Dichomitus squalens LYAD-421 SS1]	ncr:NCU00994	endothiapepsin; K06004 aspergillopepsin I [EC:3.4.23.18]	GO:0006508 proteolysis	GO:0004190 aspartic-type endopeptidase activity	--
GL18309-G	136.593	16.9033	-3.01451	Down	0.943232	gi|597985801|ref|XP_007364630.1|	protein DICSQDRAFT_135520 [Dichomitus squalens LYAD-421 SS1] >gi|395330173|gb|EJF62557.1| hypothetical protein DICSQDRAFT_135520 [Dichomitus squalens LYAD-421 SS1]	psq:PUNSTDRAFT_103509	hypothetical protein; K01613 phosphatidylserine decarboxylase [EC:4.1.1.65]	--	--	--	gi|597985801|ref|XP_007364630.1|	protein DICSQDRAFT_135520 [Dichomitus squalens LYAD-421 SS1] >gi|395330173|gb|EJF62557.1| hypothetical protein DICSQDRAFT_135520 [Dichomitus squalens LYAD-421 SS1]	psq:PUNSTDRAFT_103509	hypothetical protein; K01613 phosphatidylserine decarboxylase [EC:4.1.1.65]	--	--	--
GL18403-G	6.28667	42.86	2.76926	Up	0.86559	gi|636625599|ref|XP_008043934.1|	protein TRAVEDRAFT_74902 [Trametes versicolor FP-101664 SS1] >gi|392560569|gb|EIW53752.1| hypothetical protein TRAVEDRAFT_74902 [Trametes versicolor FP-101664 SS1]	--	--	--	--	GO:0016021 integral component of membrane	gi|636625599|ref|XP_008043934.1|	protein TRAVEDRAFT_74902 [Trametes versicolor FP-101664 SS1] >gi|392560569|gb|EIW53752.1| hypothetical protein TRAVEDRAFT_74902 [Trametes versicolor FP-101664 SS1]	--	--	--	--	GO:0016021 integral component of membrane
GL18468-G	8.92333	60.4533	2.76017	Up	0.893751	gi|597989059|ref|XP_007365466.1|	resistance-associated ABC transporter [Dichomitus squalens LYAD-421 SS1] >gi|395329378|gb|EJF61765.1| multidrug resistance-associated ABC transporter [Dichomitus squalens LYAD-421 SS1]	adl:AURDEDRAFT_92909	P-loop containing nucleoside triphosphate hydrolase protein; K05665 ATP-binding cassette, subfamily C (CFTR/MRP), member 1	GO:0055085 transmembrane transport | GO:0008152 metabolic process	GO:0042626 ATPase activity, coupled to transmembrane movement of substances | GO:0005524 ATP binding	GO:0016021 integral component of membrane	gi|597989059|ref|XP_007365466.1|	resistance-associated ABC transporter [Dichomitus squalens LYAD-421 SS1] >gi|395329378|gb|EJF61765.1| multidrug resistance-associated ABC transporter [Dichomitus squalens LYAD-421 SS1]	adl:AURDEDRAFT_92909	P-loop containing nucleoside triphosphate hydrolase protein; K05665 ATP-binding cassette, subfamily C (CFTR/MRP), member 1	GO:0055085 transmembrane transport | GO:0008152 metabolic process	GO:0042626 ATPase activity, coupled to transmembrane movement of substances | GO:0005524 ATP binding	GO:0016021 integral component of membrane
GL18474-G	6.98	40.0867	2.52182	Up	0.842694	gi|597989041|ref|XP_007365461.1|	protein DICSQDRAFT_161382 [Dichomitus squalens LYAD-421 SS1] >gi|395329373|gb|EJF61760.1| hypothetical protein DICSQDRAFT_161382 [Dichomitus squalens LYAD-421 SS1]	--	--	--	--	--	gi|597989041|ref|XP_007365461.1|	protein DICSQDRAFT_161382 [Dichomitus squalens LYAD-421 SS1] >gi|395329373|gb|EJF61760.1| hypothetical protein DICSQDRAFT_161382 [Dichomitus squalens LYAD-421 SS1]	--	--	--	--	--
GL18477-G	55.65	485.88	3.12615	Up	0.965682	gi|691787450|emb|CDO76043.1|	protein BN946_scf184959.g1 [Trametes cinnabarina]	--	--	GO:0035335 peptidyl-tyrosine dephosphorylation	GO:0004725 protein tyrosine phosphatase activity | GO:0008138 protein tyrosine/serine/threonine phosphatase activity	--	gi|691787450|emb|CDO76043.1|	protein BN946_scf184959.g1 [Trametes cinnabarina]	--	--	GO:0035335 peptidyl-tyrosine dephosphorylation	GO:0004725 protein tyrosine phosphatase activity | GO:0008138 protein tyrosine/serine/threonine phosphatase activity	--
GL18519-G	106.38	404.543	1.92707	Up	0.87415	gi|598007579|ref|XP_007370284.1|	protein DICSQDRAFT_157623 [Dichomitus squalens LYAD-421 SS1] >gi|395324573|gb|EJF57011.1| hypothetical protein DICSQDRAFT_157623 [Dichomitus squalens LYAD-421 SS1]	--	--	--	--	--	gi|598007579|ref|XP_007370284.1|	protein DICSQDRAFT_157623 [Dichomitus squalens LYAD-421 SS1] >gi|395324573|gb|EJF57011.1| hypothetical protein DICSQDRAFT_157623 [Dichomitus squalens LYAD-421 SS1]	--	--	--	--	--
GL18636-G	163.58	580.603	1.82756	Up	0.861494	gi|598002969|ref|XP_007369094.1|	protein [Dichomitus squalens LYAD-421 SS1] >gi|395325714|gb|EJF58132.1| ICMT-domain-containing protein [Dichomitus squalens LYAD-421 SS1]	--	--	--	--	--	gi|598002969|ref|XP_007369094.1|	protein [Dichomitus squalens LYAD-421 SS1] >gi|395325714|gb|EJF58132.1| ICMT-domain-containing protein [Dichomitus squalens LYAD-421 SS1]	--	--	--	--	--
GL18653-G	0	46.9467	6.55806	Up	0.924393	--	--	--	--	--	--	--	--	--	--	--	--	--	--
GL18656-G	34.98	3.42333	-3.35306	Down	0.868006	gi|636623333|ref|XP_008042801.1|	protein TRAVEDRAFT_52010 [Trametes versicolor FP-101664 SS1] >gi|392561119|gb|EIW54301.1| hypothetical protein TRAVEDRAFT_52010 [Trametes versicolor FP-101664 SS1]	--	--	--	--	--	gi|636623333|ref|XP_008042801.1|	protein TRAVEDRAFT_52010 [Trametes versicolor FP-101664 SS1] >gi|392561119|gb|EIW54301.1| hypothetical protein TRAVEDRAFT_52010 [Trametes versicolor FP-101664 SS1]	--	--	--	--	--
GL18695-G	12.5567	101.677	3.01746	Up	0.933872	gi|597979985|ref|XP_007363134.1|	metal translocatin [Dichomitus squalens LYAD-421 SS1] >gi|395331943|gb|EJF64323.1| heavy metal translocatin [Dichomitus squalens LYAD-421 SS1]	dsq:DICSQDRAFT_53339	heavy metal translocatin; K01533 Cu2+-exporting ATPase [EC:3.6.3.4]	GO:0006812 cation transport	--	--	gi|597979985|ref|XP_007363134.1|	metal translocatin [Dichomitus squalens LYAD-421 SS1] >gi|395331943|gb|EJF64323.1| heavy metal translocatin [Dichomitus squalens LYAD-421 SS1]	dsq:DICSQDRAFT_53339	heavy metal translocatin; K01533 Cu2+-exporting ATPase [EC:3.6.3.4]	GO:0006812 cation transport	--	--
GL18701-G	13.6433	70.22	2.32886	Up	0.874518	--	--	--	--	--	--	--	--	--	--	--	--	--	--
GL18702-G	20.6833	85.1767	2.04199	Up	0.854378	gi|636614089|ref|XP_008038179.1|	protein TRAVEDRAFT_28986 [Trametes versicolor FP-101664 SS1] >gi|392565168|gb|EIW58345.1| hypothetical protein TRAVEDRAFT_28986 [Trametes versicolor FP-101664 SS1]	--	--	--	--	--	gi|636614089|ref|XP_008038179.1|	protein TRAVEDRAFT_28986 [Trametes versicolor FP-101664 SS1] >gi|392565168|gb|EIW58345.1| hypothetical protein TRAVEDRAFT_28986 [Trametes versicolor FP-101664 SS1]	--	--	--	--	--
GL18710-G	4.81	32.28	2.74653	Up	0.83315	gi|597979733|ref|XP_007363071.1|	protein [Dichomitus squalens LYAD-421 SS1] >gi|395331880|gb|EJF64260.1| kinase-like protein [Dichomitus squalens LYAD-421 SS1]	cmt:CCM_01235	mitogen-activated protein kinase; K04371 mitogen-activated protein kinase 1/3 [EC:2.7.11.24]	--	--	--	gi|597979733|ref|XP_007363071.1|	protein [Dichomitus squalens LYAD-421 SS1] >gi|395331880|gb|EJF64260.1| kinase-like protein [Dichomitus squalens LYAD-421 SS1]	cmt:CCM_01235	mitogen-activated protein kinase; K04371 mitogen-activated protein kinase 1/3 [EC:2.7.11.24]	--	--	--
GL18726-G	107.573	633.71	2.5585	Up	0.941906	gi|597979429|ref|XP_007362995.1|	protein DICSQDRAFT_133851 [Dichomitus squalens LYAD-421 SS1] >gi|395331804|gb|EJF64184.1| hypothetical protein DICSQDRAFT_133851 [Dichomitus squalens LYAD-421 SS1]	--	--	--	--	--	gi|597979429|ref|XP_007362995.1|	protein DICSQDRAFT_133851 [Dichomitus squalens LYAD-421 SS1] >gi|395331804|gb|EJF64184.1| hypothetical protein DICSQDRAFT_133851 [Dichomitus squalens LYAD-421 SS1]	--	--	--	--	--
GL18743-G	11.6633	56.88	2.28594	Up	0.855245	gi|597979321|ref|XP_007362966.1|	protein [Dichomitus squalens LYAD-421 SS1] >gi|395331775|gb|EJF64155.1| Leo1-domain-containing protein [Dichomitus squalens LYAD-421 SS1]	dsq:DICSQDRAFT_144843	Leo1-domain-containing protein; K15177 RNA polymerase-associated protein LEO1	GO:0044238 primary metabolic process | GO:0044260 cellular macromolecule metabolic process	--	--	gi|597979321|ref|XP_007362966.1|	protein [Dichomitus squalens LYAD-421 SS1] >gi|395331775|gb|EJF64155.1| Leo1-domain-containing protein [Dichomitus squalens LYAD-421 SS1]	dsq:DICSQDRAFT_144843	Leo1-domain-containing protein; K15177 RNA polymerase-associated protein LEO1	GO:0044238 primary metabolic process | GO:0044260 cellular macromolecule metabolic process	--	--
GL18757-G	13.1833	121.87	3.20856	Up	0.947328	gi|597979175|ref|XP_007362928.1|	snRNP-specific spliceosomal protein [Dichomitus squalens LYAD-421 SS1] >gi|395331737|gb|EJF64117.1| U4/U6 snRNP-specific spliceosomal protein [Dichomitus squalens LYAD-421 SS1]	dsq:DICSQDRAFT_81126	U4/U6 snRNP-specific spliceosomal protein; K12662 U4/U6 small nuclear ribonucleoprotein PRP4	GO:0008380 RNA splicing	--	--	gi|597979175|ref|XP_007362928.1|	snRNP-specific spliceosomal protein [Dichomitus squalens LYAD-421 SS1] >gi|395331737|gb|EJF64117.1| U4/U6 snRNP-specific spliceosomal protein [Dichomitus squalens LYAD-421 SS1]	dsq:DICSQDRAFT_81126	U4/U6 snRNP-specific spliceosomal protein; K12662 U4/U6 small nuclear ribonucleoprotein PRP4	GO:0008380 RNA splicing	--	--
GL18765-G	10.5233	42.9867	2.0303	Up	0.802192	gi|597979051|ref|XP_007362897.1|	protein [Dichomitus squalens LYAD-421 SS1] >gi|395331706|gb|EJF64086.1| TPT-domain-containing protein [Dichomitus squalens LYAD-421 SS1]	dsq:DICSQDRAFT_53403	TPT-domain-containing protein; K15283 solute carrier family 35, member E1	--	--	--	gi|597979051|ref|XP_007362897.1|	protein [Dichomitus squalens LYAD-421 SS1] >gi|395331706|gb|EJF64086.1| TPT-domain-containing protein [Dichomitus squalens LYAD-421 SS1]	dsq:DICSQDRAFT_53403	TPT-domain-containing protein; K15283 solute carrier family 35, member E1	--	--	--
GL18770-G	35.1167	5.23	-2.74727	Down	0.843048	gi|126657|sp|P14945.2|LZ8_GANLU	Full=Immunomodulatory protein Ling Zhi-8; Short=LZ-8 >gi|258588262|pdb|3F3H|A Chain A, Crystal Structure And Anti-tumor Activity Of Lz-8 From The Fungus Ganoderma Lucidium >gi|258588263|pdb|3F3H|B Chain B, Crystal Structure And Anti-tumor Activity Of Lz-8 From The Fungus Ganoderma Lucidium >gi|168188|gb|AAA33350.1| immunomodulatory protein [Ganoderma lucidum]	--	--	GO:0002682 regulation of immune system process	GO:0030246 carbohydrate binding	--	gi|126657|sp|P14945.2|LZ8_GANLU	Full=Immunomodulatory protein Ling Zhi-8; Short=LZ-8 >gi|258588262|pdb|3F3H|A Chain A, Crystal Structure And Anti-tumor Activity Of Lz-8 From The Fungus Ganoderma Lucidium >gi|258588263|pdb|3F3H|B Chain B, Crystal Structure And Anti-tumor Activity Of Lz-8 From The Fungus Ganoderma Lucidium >gi|168188|gb|AAA33350.1| immunomodulatory protein [Ganoderma lucidum]	--	--	GO:0002682 regulation of immune system process	GO:0030246 carbohydrate binding	--
GL18800-G	162.587	28.5067	-2.51184	Down	0.921741	gi|597988319|ref|XP_007365276.1|	protein [Dichomitus squalens LYAD-421 SS1] >gi|395329635|gb|EJF62021.1| NAD(P)-binding protein [Dichomitus squalens LYAD-421 SS1]	sce:YIL124W	AYR1, GBG1; acylglycerone-phosphate reductase; K06123 1-acylglycerone phosphate reductase [EC:1.1.1.101]	GO:0008152 metabolic process	--	--	gi|597988319|ref|XP_007365276.1|	protein [Dichomitus squalens LYAD-421 SS1] >gi|395329635|gb|EJF62021.1| NAD(P)-binding protein [Dichomitus squalens LYAD-421 SS1]	sce:YIL124W	AYR1, GBG1; acylglycerone-phosphate reductase; K06123 1-acylglycerone phosphate reductase [EC:1.1.1.101]	GO:0008152 metabolic process	--	--
GL18813-G	41.1433	212.773	2.37059	Up	0.916253	gi|597988303|ref|XP_007365272.1|	protein DICSQDRAFT_169593 [Dichomitus squalens LYAD-421 SS1] >gi|395329631|gb|EJF62017.1| hypothetical protein DICSQDRAFT_169593 [Dichomitus squalens LYAD-421 SS1]	--	--	GO:0006351 transcription, DNA-templated	GO:0046872 metal ion binding	--	gi|597988303|ref|XP_007365272.1|	protein DICSQDRAFT_169593 [Dichomitus squalens LYAD-421 SS1] >gi|395329631|gb|EJF62017.1| hypothetical protein DICSQDRAFT_169593 [Dichomitus squalens LYAD-421 SS1]	--	--	GO:0006351 transcription, DNA-templated	GO:0046872 metal ion binding	--
GL18848-G	38.6833	294.593	2.92894	Up	0.953722	gi|598000023|ref|XP_007368317.1|	protein [Dichomitus squalens LYAD-421 SS1] >gi|395326606|gb|EJF59014.1| NAD(P)-binding protein [Dichomitus squalens LYAD-421 SS1]	zro:ZYRO0F05214g	hypothetical protein; K17741 NADPH-dependent methylglyoxal reductase [EC:1.1.1.283]	GO:0008152 metabolic process	GO:0050662 coenzyme binding | GO:0003824 catalytic activity	--	gi|598000023|ref|XP_007368317.1|	protein [Dichomitus squalens LYAD-421 SS1] >gi|395326606|gb|EJF59014.1| NAD(P)-binding protein [Dichomitus squalens LYAD-421 SS1]	zro:ZYRO0F05214g	hypothetical protein; K17741 NADPH-dependent methylglyoxal reductase [EC:1.1.1.283]	GO:0008152 metabolic process	GO:0050662 coenzyme binding | GO:0003824 catalytic activity	--
GL18897-G	17.98	71.33	1.98812	Up	0.837219	gi|691794434|emb|CDO70559.1|	protein BN946_scf184579.g15 [Trametes cinnabarina]	wic:J056_001061	Elongator complex protein 3; K07739 elongator complex protein 3 [EC:2.3.1.48]	--	--	GO:0016021 integral component of membrane	gi|691794434|emb|CDO70559.1|	protein BN946_scf184579.g15 [Trametes cinnabarina]	wic:J056_001061	Elongator complex protein 3; K07739 elongator complex protein 3 [EC:2.3.1.48]	--	--	GO:0016021 integral component of membrane
GL18900-G	69.2967	289.877	2.06458	Up	0.890088	gi|597997849|ref|XP_007367745.1|	D-fructose 6-phosphate amidotansferase [Dichomitus squalens LYAD-421 SS1] >gi|395327176|gb|EJF59578.1| L-glutamine D-fructose 6-phosphate amidotansferase [Dichomitus squalens LYAD-421 SS1]	dsq:DICSQDRAFT_181912	L-glutamine D-fructose 6-phosphate amidotansferase; K00820 glucosamine--fructose-6-phosphate aminotransferase (isomerizing) [EC:2.6.1.16]	GO:0005975 carbohydrate metabolic process | GO:1901137 carbohydrate derivative biosynthetic process	GO:0004360 glutamine-fructose-6-phosphate transaminase (isomerizing) activity | GO:0030246 carbohydrate binding	--	gi|597997849|ref|XP_007367745.1|	D-fructose 6-phosphate amidotansferase [Dichomitus squalens LYAD-421 SS1] >gi|395327176|gb|EJF59578.1| L-glutamine D-fructose 6-phosphate amidotansferase [Dichomitus squalens LYAD-421 SS1]	dsq:DICSQDRAFT_181912	L-glutamine D-fructose 6-phosphate amidotansferase; K00820 glucosamine--fructose-6-phosphate aminotransferase (isomerizing) [EC:2.6.1.16]	GO:0005975 carbohydrate metabolic process | GO:1901137 carbohydrate derivative biosynthetic process	GO:0004360 glutamine-fructose-6-phosphate transaminase (isomerizing) activity | GO:0030246 carbohydrate binding	--
GL18907-G	23.2267	122.897	2.40359	Up	0.906184	gi|597997857|ref|XP_007367747.1|	protein DICSQDRAFT_64783 [Dichomitus squalens LYAD-421 SS1] >gi|395327178|gb|EJF59580.1| hypothetical protein DICSQDRAFT_64783 [Dichomitus squalens LYAD-421 SS1]	--	--	--	GO:0003676 nucleic acid binding	--	gi|597997857|ref|XP_007367747.1|	protein DICSQDRAFT_64783 [Dichomitus squalens LYAD-421 SS1] >gi|395327178|gb|EJF59580.1| hypothetical protein DICSQDRAFT_64783 [Dichomitus squalens LYAD-421 SS1]	--	--	--	GO:0003676 nucleic acid binding	--
GL18940-G	2.13	22.2267	3.38337	Up	0.808192	gi|597994567|ref|XP_007366904.1|	protein DICSQDRAFT_87956 [Dichomitus squalens LYAD-421 SS1] >gi|395328091|gb|EJF60486.1| hypothetical protein DICSQDRAFT_87956 [Dichomitus squalens LYAD-421 SS1]	afv:AFLA_005130	L-lysine 2,3-aminomutase, putative; K01843 lysine 2,3-aminomutase [EC:5.4.3.2]	--	--	--	gi|597994567|ref|XP_007366904.1|	protein DICSQDRAFT_87956 [Dichomitus squalens LYAD-421 SS1] >gi|395328091|gb|EJF60486.1| hypothetical protein DICSQDRAFT_87956 [Dichomitus squalens LYAD-421 SS1]	afv:AFLA_005130	L-lysine 2,3-aminomutase, putative; K01843 lysine 2,3-aminomutase [EC:5.4.3.2]	--	--	--
GL18944-G	43.6667	271.117	2.63431	Up	0.938637	gi|597994743|ref|XP_007366950.1|	protein DICSQDRAFT_137599 [Dichomitus squalens LYAD-421 SS1] >gi|395327874|gb|EJF60270.1| hypothetical protein DICSQDRAFT_137599 [Dichomitus squalens LYAD-421 SS1]	--	--	--	--	--	gi|597994743|ref|XP_007366950.1|	protein DICSQDRAFT_137599 [Dichomitus squalens LYAD-421 SS1] >gi|395327874|gb|EJF60270.1| hypothetical protein DICSQDRAFT_137599 [Dichomitus squalens LYAD-421 SS1]	--	--	--	--	--
GL18978-G	36.74	358.307	3.28577	Up	0.967835	gi|598008051|ref|XP_007370469.1|	protein DICSQDRAFT_163713 [Dichomitus squalens LYAD-421 SS1] >gi|395324347|gb|EJF56789.1| hypothetical protein DICSQDRAFT_163713 [Dichomitus squalens LYAD-421 SS1]	--	--	--	--	--	gi|598008051|ref|XP_007370469.1|	protein DICSQDRAFT_163713 [Dichomitus squalens LYAD-421 SS1] >gi|395324347|gb|EJF56789.1| hypothetical protein DICSQDRAFT_163713 [Dichomitus squalens LYAD-421 SS1]	--	--	--	--	--
GL18988-G	19.0867	247.96	3.69947	Up	0.972351	gi|597998373|ref|XP_007367880.1|	protein [Dichomitus squalens LYAD-421 SS1] >gi|395326893|gb|EJF59297.1| GroES-like protein [Dichomitus squalens LYAD-421 SS1]	dsq:DICSQDRAFT_108881	GroES-like protein; K00008 L-iditol 2-dehydrogenase [EC:1.1.1.14]	GO:0055114 oxidation-reduction process	GO:0008270 zinc ion binding | GO:0016491 oxidoreductase activity	--	gi|597998373|ref|XP_007367880.1|	protein [Dichomitus squalens LYAD-421 SS1] >gi|395326893|gb|EJF59297.1| GroES-like protein [Dichomitus squalens LYAD-421 SS1]	dsq:DICSQDRAFT_108881	GroES-like protein; K00008 L-iditol 2-dehydrogenase [EC:1.1.1.14]	GO:0055114 oxidation-reduction process	GO:0008270 zinc ion binding | GO:0016491 oxidoreductase activity	--
GL18994-G	24.26	98.67	2.02403	Up	0.858264	gi|636621189|ref|XP_008041729.1|	protein [Trametes versicolor FP-101664 SS1] >gi|392561836|gb|EIW55017.1| translocation protein [Trametes versicolor FP-101664 SS1]	dsq:DICSQDRAFT_156096	translocation protein; K12275 translocation protein SEC62	GO:0015031 protein transport	GO:0008565 protein transporter activity	GO:0030176 integral component of endoplasmic reticulum membrane	gi|636621189|ref|XP_008041729.1|	protein [Trametes versicolor FP-101664 SS1] >gi|392561836|gb|EIW55017.1| translocation protein [Trametes versicolor FP-101664 SS1]	dsq:DICSQDRAFT_156096	translocation protein; K12275 translocation protein SEC62	GO:0015031 protein transport	GO:0008565 protein transporter activity	GO:0030176 integral component of endoplasmic reticulum membrane
GL19034-G	11.1267	51.2433	2.20334	Up	0.838191	gi|597992909|ref|XP_007366476.1|	protein DICSQDRAFT_29488, partial [Dichomitus squalens LYAD-421 SS1] >gi|395328246|gb|EJF60639.1| hypothetical protein DICSQDRAFT_29488, partial [Dichomitus squalens LYAD-421 SS1]	--	--	--	--	--	gi|597992909|ref|XP_007366476.1|	protein DICSQDRAFT_29488, partial [Dichomitus squalens LYAD-421 SS1] >gi|395328246|gb|EJF60639.1| hypothetical protein DICSQDRAFT_29488, partial [Dichomitus squalens LYAD-421 SS1]	--	--	--	--	--
GL19118-G	392.287	133.527	-1.55478	Down	0.805041	gi|691795587|emb|CDO69714.1|	protein BN946_scf184851.g102 [Trametes cinnabarina]	dsq:DICSQDRAFT_149350	P-loop containing nucleoside triphosphate hydrolase protein; K03695 ATP-dependent Clp protease ATP-binding subunit ClpB	--	--	--	gi|691795587|emb|CDO69714.1|	protein BN946_scf184851.g102 [Trametes cinnabarina]	dsq:DICSQDRAFT_149350	P-loop containing nucleoside triphosphate hydrolase protein; K03695 ATP-dependent Clp protease ATP-binding subunit ClpB	--	--	--
GL19138-G	60.3733	355.043	2.55601	Up	0.937443	gi|598010285|ref|XP_007370988.1|	protein DICSQDRAFT_141364 [Dichomitus squalens LYAD-421 SS1] >gi|395323795|gb|EJF56251.1| hypothetical protein DICSQDRAFT_141364 [Dichomitus squalens LYAD-421 SS1]	--	--	--	--	--	gi|598010285|ref|XP_007370988.1|	protein DICSQDRAFT_141364 [Dichomitus squalens LYAD-421 SS1] >gi|395323795|gb|EJF56251.1| hypothetical protein DICSQDRAFT_141364 [Dichomitus squalens LYAD-421 SS1]	--	--	--	--	--
GL19201-G	16.05	60.0433	1.90343	Up	0.811474	gi|597992501|ref|XP_007366368.1|	protein [Dichomitus squalens LYAD-421 SS1] >gi|395328441|gb|EJF60833.1| PAP2-domain-containing protein [Dichomitus squalens LYAD-421 SS1]	ztr:MYCGRDRAFT_109911	hypothetical protein; K02867 large subunit ribosomal protein L11	--	--	GO:0016020 membrane	gi|597992501|ref|XP_007366368.1|	protein [Dichomitus squalens LYAD-421 SS1] >gi|395328441|gb|EJF60833.1| PAP2-domain-containing protein [Dichomitus squalens LYAD-421 SS1]	ztr:MYCGRDRAFT_109911	hypothetical protein; K02867 large subunit ribosomal protein L11	--	--	GO:0016020 membrane
GL19256-G	5.77333	33.0067	2.51528	Up	0.820743	gi|597997907|ref|XP_007367760.1|	protein DICSQDRAFT_181922 [Dichomitus squalens LYAD-421 SS1] >gi|395327191|gb|EJF59593.1| hypothetical protein DICSQDRAFT_181922 [Dichomitus squalens LYAD-421 SS1]	--	--	--	--	--	gi|597997907|ref|XP_007367760.1|	protein DICSQDRAFT_181922 [Dichomitus squalens LYAD-421 SS1] >gi|395327191|gb|EJF59593.1| hypothetical protein DICSQDRAFT_181922 [Dichomitus squalens LYAD-421 SS1]	--	--	--	--	--
GL19328-G	13.3	114.263	3.10286	Up	0.941407	gi|597985151|ref|XP_007364464.1|	protein [Dichomitus squalens LYAD-421 SS1] >gi|395330735|gb|EJF63118.1| Cerato-platanin-domain-containing protein [Dichomitus squalens LYAD-421 SS1]	--	--	--	--	--	gi|597985151|ref|XP_007364464.1|	protein [Dichomitus squalens LYAD-421 SS1] >gi|395330735|gb|EJF63118.1| Cerato-platanin-domain-containing protein [Dichomitus squalens LYAD-421 SS1]	--	--	--	--	--
GL19356-G	111.847	606.75	2.43958	Up	0.932926	gi|598012731|ref|XP_007371573.1|	protein DICSQDRAFT_114050 [Dichomitus squalens LYAD-421 SS1] >gi|395323209|gb|EJF55696.1| hypothetical protein DICSQDRAFT_114050 [Dichomitus squalens LYAD-421 SS1]	fme:FOMMEDRAFT_105705	kinase-like protein; K05111 Eph receptor B2 [EC:2.7.10.1]	--	--	--	gi|598012731|ref|XP_007371573.1|	protein DICSQDRAFT_114050 [Dichomitus squalens LYAD-421 SS1] >gi|395323209|gb|EJF55696.1| hypothetical protein DICSQDRAFT_114050 [Dichomitus squalens LYAD-421 SS1]	fme:FOMMEDRAFT_105705	kinase-like protein; K05111 Eph receptor B2 [EC:2.7.10.1]	--	--	--
GL19371-G	4.82333	45.86	3.24913	Up	0.892018	gi|691786895|emb|CDO76417.1|	protein BN946_scf184925.g4 [Trametes cinnabarina]	ppl:POSPLDRAFT_97158	hypothetical protein; K15710 E3 ubiquitin-protein ligase SHPRH [EC:3.6.4.- 2.3.2.27]	--	--	--	gi|691786895|emb|CDO76417.1|	protein BN946_scf184925.g4 [Trametes cinnabarina]	ppl:POSPLDRAFT_97158	hypothetical protein; K15710 E3 ubiquitin-protein ligase SHPRH [EC:3.6.4.- 2.3.2.27]	--	--	--
GL19382-G	140.21	792.91	2.49957	Up	0.938598	gi|597998535|ref|XP_007367923.1|	protease, partial [Dichomitus squalens LYAD-421 SS1] >gi|395326936|gb|EJF59340.1| acid protease, partial [Dichomitus squalens LYAD-421 SS1]	cput:CONPUDRAFT_83398	acid protease; K01379 cathepsin D [EC:3.4.23.5]	GO:0006508 proteolysis	GO:0004190 aspartic-type endopeptidase activity	--	gi|597998535|ref|XP_007367923.1|	protease, partial [Dichomitus squalens LYAD-421 SS1] >gi|395326936|gb|EJF59340.1| acid protease, partial [Dichomitus squalens LYAD-421 SS1]	cput:CONPUDRAFT_83398	acid protease; K01379 cathepsin D [EC:3.4.23.5]	GO:0006508 proteolysis	GO:0004190 aspartic-type endopeptidase activity	--
GL19388-G	268.413	26.19	-3.35737	Down	0.966903	gi|597998611|ref|XP_007367942.1|	protein DICSQDRAFT_172150 [Dichomitus squalens LYAD-421 SS1] >gi|395326955|gb|EJF59359.1| hypothetical protein DICSQDRAFT_172150 [Dichomitus squalens LYAD-421 SS1]	--	--	--	--	--	gi|597998611|ref|XP_007367942.1|	protein DICSQDRAFT_172150 [Dichomitus squalens LYAD-421 SS1] >gi|395326955|gb|EJF59359.1| hypothetical protein DICSQDRAFT_172150 [Dichomitus squalens LYAD-421 SS1]	--	--	--	--	--
GL19404-G	650.73	185.017	-1.8144	Down	0.859275	gi|597990909|ref|XP_007365947.1|	protein DICSQDRAFT_86477 [Dichomitus squalens LYAD-421 SS1] >gi|395328728|gb|EJF61118.1| hypothetical protein DICSQDRAFT_86477 [Dichomitus squalens LYAD-421 SS1]	ani:AN4179.2	hypothetical protein; K00626 acetyl-CoA C-acetyltransferase [EC:2.3.1.9]	--	--	--	gi|597990909|ref|XP_007365947.1|	protein DICSQDRAFT_86477 [Dichomitus squalens LYAD-421 SS1] >gi|395328728|gb|EJF61118.1| hypothetical protein DICSQDRAFT_86477 [Dichomitus squalens LYAD-421 SS1]	ani:AN4179.2	hypothetical protein; K00626 acetyl-CoA C-acetyltransferase [EC:2.3.1.9]	--	--	--
GL19430-G	7.56333	40.02	2.40363	Up	0.833071	gi|598007249|ref|XP_007370157.1|	protein DICSQDRAFT_129683 [Dichomitus squalens LYAD-421 SS1] >gi|395324669|gb|EJF57105.1| hypothetical protein DICSQDRAFT_129683 [Dichomitus squalens LYAD-421 SS1]	dsq:DICSQDRAFT_129683	hypothetical protein; K11309 regulator of Ty1 transposition protein 109	GO:0006355 regulation of transcription, DNA-templated | GO:0016573 histone acetylation	GO:0004402 histone acetyltransferase activity	GO:0016020 membrane	gi|598007249|ref|XP_007370157.1|	protein DICSQDRAFT_129683 [Dichomitus squalens LYAD-421 SS1] >gi|395324669|gb|EJF57105.1| hypothetical protein DICSQDRAFT_129683 [Dichomitus squalens LYAD-421 SS1]	dsq:DICSQDRAFT_129683	hypothetical protein; K11309 regulator of Ty1 transposition protein 109	GO:0006355 regulation of transcription, DNA-templated | GO:0016573 histone acetylation	GO:0004402 histone acetyltransferase activity	GO:0016020 membrane
GL19436-G	41.1533	136.24	1.72707	Up	0.823237	gi|691794120|emb|CDO70856.1|	protein BN946_scf184801.g49 [Trametes cinnabarina]	--	--	--	--	GO:0016021 integral component of membrane	gi|691794120|emb|CDO70856.1|	protein BN946_scf184801.g49 [Trametes cinnabarina]	--	--	--	--	GO:0016021 integral component of membrane
GL19454-G	12.3167	58.5033	2.24791	Up	0.853788	gi|597982401|ref|XP_007363760.1|	protein DICSQDRAFT_179224 [Dichomitus squalens LYAD-421 SS1] >gi|395330826|gb|EJF63208.1| hypothetical protein DICSQDRAFT_179224 [Dichomitus squalens LYAD-421 SS1]	--	--	--	--	--	gi|597982401|ref|XP_007363760.1|	protein DICSQDRAFT_179224 [Dichomitus squalens LYAD-421 SS1] >gi|395330826|gb|EJF63208.1| hypothetical protein DICSQDRAFT_179224 [Dichomitus squalens LYAD-421 SS1]	--	--	--	--	--
GL19486-G	7.25	35.3967	2.28756	Up	0.809571	gi|597992027|ref|XP_007366238.1|	protein DICSQDRAFT_170561 [Dichomitus squalens LYAD-421 SS1] >gi|395328627|gb|EJF61018.1| hypothetical protein DICSQDRAFT_170561 [Dichomitus squalens LYAD-421 SS1]	--	--	--	--	--	gi|597992027|ref|XP_007366238.1|	protein DICSQDRAFT_170561 [Dichomitus squalens LYAD-421 SS1] >gi|395328627|gb|EJF61018.1| hypothetical protein DICSQDRAFT_170561 [Dichomitus squalens LYAD-421 SS1]	--	--	--	--	--
GL19503-G	92.6633	423.623	2.19271	Up	0.908218	--	--	--	--	--	--	--	--	--	--	--	--	--	--
GL19504-G	19.1767	166.097	3.1146	Up	0.951595	gi|597982707|ref|XP_007363841.1|	protein DICSQDRAFT_134727 [Dichomitus squalens LYAD-421 SS1] >gi|395330907|gb|EJF63289.1| hypothetical protein DICSQDRAFT_134727 [Dichomitus squalens LYAD-421 SS1]	dsq:DICSQDRAFT_134727	hypothetical protein; K01526 guanosine-diphosphatase [EC:3.6.1.42]	GO:0008152 metabolic process	GO:0016787 hydrolase activity	GO:0016021 integral component of membrane	gi|597982707|ref|XP_007363841.1|	protein DICSQDRAFT_134727 [Dichomitus squalens LYAD-421 SS1] >gi|395330907|gb|EJF63289.1| hypothetical protein DICSQDRAFT_134727 [Dichomitus squalens LYAD-421 SS1]	dsq:DICSQDRAFT_134727	hypothetical protein; K01526 guanosine-diphosphatase [EC:3.6.1.42]	GO:0008152 metabolic process	GO:0016787 hydrolase activity	GO:0016021 integral component of membrane
GL19520-G	274.547	1021.39	1.89541	Up	0.875738	gi|597982899|ref|XP_007363893.1|	protein DICSQDRAFT_38874, partial [Dichomitus squalens LYAD-421 SS1] >gi|395330959|gb|EJF63341.1| hypothetical protein DICSQDRAFT_38874, partial [Dichomitus squalens LYAD-421 SS1]	--	--	--	--	--	gi|597982899|ref|XP_007363893.1|	protein DICSQDRAFT_38874, partial [Dichomitus squalens LYAD-421 SS1] >gi|395330959|gb|EJF63341.1| hypothetical protein DICSQDRAFT_38874, partial [Dichomitus squalens LYAD-421 SS1]	--	--	--	--	--
GL19576-G	2.79	38.2533	3.69354	Up	0.885847	gi|691783608|emb|CDO78271.1|	protein BN946_scf184588.g1 [Trametes cinnabarina]	--	--	--	--	--	gi|691783608|emb|CDO78271.1|	protein BN946_scf184588.g1 [Trametes cinnabarina]	--	--	--	--	--
GL19604-G	270.417	41.1633	-2.71575	Down	0.943495	gi|597981631|ref|XP_007363555.1|	protein DICSQDRAFT_167885 [Dichomitus squalens LYAD-421 SS1] >gi|395331456|gb|EJF63837.1| hypothetical protein DICSQDRAFT_167885 [Dichomitus squalens LYAD-421 SS1]	wse:WALSEDRAFT_10435	P-loop containing nucleoside triphosphate hydrolase protein; K06158 ATP-binding cassette, subfamily F, member 3	GO:0008152 metabolic process	GO:0016887 ATPase activity | GO:0005524 ATP binding	--	gi|597981631|ref|XP_007363555.1|	protein DICSQDRAFT_167885 [Dichomitus squalens LYAD-421 SS1] >gi|395331456|gb|EJF63837.1| hypothetical protein DICSQDRAFT_167885 [Dichomitus squalens LYAD-421 SS1]	wse:WALSEDRAFT_10435	P-loop containing nucleoside triphosphate hydrolase protein; K06158 ATP-binding cassette, subfamily F, member 3	GO:0008152 metabolic process	GO:0016887 ATPase activity | GO:0005524 ATP binding	--
GL19617-G	22.0067	94.2033	2.09784	Up	0.866299	gi|449543666|gb|EMD34641.1|	protein CERSUDRAFT_140205 [Gelatoporia subvermispora B]	dsq:DICSQDRAFT_44493	translation initiation factor eIF4e; K03259 translation initiation factor 4E	GO:0006413 translational initiation	GO:0003743 translation initiation factor activity	GO:0005737 cytoplasm	gi|449543666|gb|EMD34641.1|	protein CERSUDRAFT_140205 [Gelatoporia subvermispora B]	dsq:DICSQDRAFT_44493	translation initiation factor eIF4e; K03259 translation initiation factor 4E	GO:0006413 translational initiation	GO:0003743 translation initiation factor activity	GO:0005737 cytoplasm
GL19627-G	14.3367	56.43	1.97675	Up	0.818892	gi|598001407|ref|XP_007368671.1|	binding oxidoreductase [Dichomitus squalens LYAD-421 SS1] >gi|395326232|gb|EJF58644.1| molybdopterin binding oxidoreductase [Dichomitus squalens LYAD-421 SS1]	dsq:DICSQDRAFT_66595	molybdopterin binding oxidoreductase; K00387 sulfite oxidase [EC:1.8.3.1]	GO:0042128 nitrate assimilation | GO:0055114 oxidation-reduction process	GO:0016491 oxidoreductase activity | GO:0030151 molybdenum ion binding	--	gi|598001407|ref|XP_007368671.1|	binding oxidoreductase [Dichomitus squalens LYAD-421 SS1] >gi|395326232|gb|EJF58644.1| molybdopterin binding oxidoreductase [Dichomitus squalens LYAD-421 SS1]	dsq:DICSQDRAFT_66595	molybdopterin binding oxidoreductase; K00387 sulfite oxidase [EC:1.8.3.1]	GO:0042128 nitrate assimilation | GO:0055114 oxidation-reduction process	GO:0016491 oxidoreductase activity | GO:0030151 molybdenum ion binding	--
GL19691-G	102.42	15.8133	-2.69528	Down	0.919837	gi|598011055|ref|XP_007371175.1|	protein DICSQDRAFT_175238 [Dichomitus squalens LYAD-421 SS1] >gi|395323620|gb|EJF56084.1| hypothetical protein DICSQDRAFT_175238 [Dichomitus squalens LYAD-421 SS1]	--	--	--	--	--	gi|598011055|ref|XP_007371175.1|	protein DICSQDRAFT_175238 [Dichomitus squalens LYAD-421 SS1] >gi|395323620|gb|EJF56084.1| hypothetical protein DICSQDRAFT_175238 [Dichomitus squalens LYAD-421 SS1]	--	--	--	--	--
GL19760-G	10.47	46.2833	2.14423	Up	0.822489	gi|597973409|ref|XP_007361449.1|	protein DICSQDRAFT_143539 [Dichomitus squalens LYAD-421 SS1] >gi|395333810|gb|EJF66187.1| hypothetical protein DICSQDRAFT_143539 [Dichomitus squalens LYAD-421 SS1]	--	--	--	--	--	gi|597973409|ref|XP_007361449.1|	protein DICSQDRAFT_143539 [Dichomitus squalens LYAD-421 SS1] >gi|395333810|gb|EJF66187.1| hypothetical protein DICSQDRAFT_143539 [Dichomitus squalens LYAD-421 SS1]	--	--	--	--	--
GL19763-G	12.3667	99.5067	3.00834	Up	0.932559	gi|597973443|ref|XP_007361458.1|	repeat-like protein [Dichomitus squalens LYAD-421 SS1] >gi|395333819|gb|EJF66196.1| WD40 repeat-like protein [Dichomitus squalens LYAD-421 SS1]	dsq:DICSQDRAFT_152179	WD40 repeat-like protein; K03361 F-box and WD-40 domain protein CDC4	--	--	--	gi|597973443|ref|XP_007361458.1|	repeat-like protein [Dichomitus squalens LYAD-421 SS1] >gi|395333819|gb|EJF66196.1| WD40 repeat-like protein [Dichomitus squalens LYAD-421 SS1]	dsq:DICSQDRAFT_152179	WD40 repeat-like protein; K03361 F-box and WD-40 domain protein CDC4	--	--	--
GL19811-G	44.02	160.387	1.86532	Up	0.851831	gi|597972467|ref|XP_007361211.1|	transferase subunit OST3/OST6 family [Dichomitus squalens LYAD-421 SS1] >gi|395333572|gb|EJF65949.1| oligosaccharyl transferase subunit OST3/OST6 family [Dichomitus squalens LYAD-421 SS1]	dsq:DICSQDRAFT_151970	oligosaccharyl transferase subunit OST3/OST6 family; K12669 oligosaccharyltransferase complex subunit gamma	--	--	GO:0016020 membrane	gi|597972467|ref|XP_007361211.1|	transferase subunit OST3/OST6 family [Dichomitus squalens LYAD-421 SS1] >gi|395333572|gb|EJF65949.1| oligosaccharyl transferase subunit OST3/OST6 family [Dichomitus squalens LYAD-421 SS1]	dsq:DICSQDRAFT_151970	oligosaccharyl transferase subunit OST3/OST6 family; K12669 oligosaccharyltransferase complex subunit gamma	--	--	GO:0016020 membrane
GL19831-G	8.95333	38.7833	2.11494	Up	0.801484	gi|597972993|ref|XP_007361344.1|	protein DICSQDRAFT_48992 [Dichomitus squalens LYAD-421 SS1] >gi|395333705|gb|EJF66082.1| hypothetical protein DICSQDRAFT_48992 [Dichomitus squalens LYAD-421 SS1]	dsq:DICSQDRAFT_48992	hypothetical protein; K12272 signal recognition particle receptor subunit beta	--	--	GO:0016021 integral component of membrane	gi|597972993|ref|XP_007361344.1|	protein DICSQDRAFT_48992 [Dichomitus squalens LYAD-421 SS1] >gi|395333705|gb|EJF66082.1| hypothetical protein DICSQDRAFT_48992 [Dichomitus squalens LYAD-421 SS1]	dsq:DICSQDRAFT_48992	hypothetical protein; K12272 signal recognition particle receptor subunit beta	--	--	GO:0016021 integral component of membrane
GL19838-G	28.1367	97.8733	1.79846	Up	0.822844	gi|691788905|emb|CDO75032.1|	protein BN946_scf184640.g7 [Trametes cinnabarina]	--	--	--	--	--	gi|691788905|emb|CDO75032.1|	protein BN946_scf184640.g7 [Trametes cinnabarina]	--	--	--	--	--
GL19843-G	9.35333	123.733	3.72561	Up	0.959262	gi|598003429|ref|XP_007369224.1|	protein DICSQDRAFT_182819 [Dichomitus squalens LYAD-421 SS1] >gi|395325556|gb|EJF57976.1| hypothetical protein DICSQDRAFT_182819 [Dichomitus squalens LYAD-421 SS1]	--	--	--	--	--	gi|598003429|ref|XP_007369224.1|	protein DICSQDRAFT_182819 [Dichomitus squalens LYAD-421 SS1] >gi|395325556|gb|EJF57976.1| hypothetical protein DICSQDRAFT_182819 [Dichomitus squalens LYAD-421 SS1]	--	--	--	--	--
GL19847-G	4.81	30.77	2.67742	Up	0.823132	gi|598006821|ref|XP_007370040.1|	protein [Dichomitus squalens LYAD-421 SS1] >gi|395324774|gb|EJF57208.1| PAP2-domain-containing protein [Dichomitus squalens LYAD-421 SS1]	dsq:DICSQDRAFT_69911	PAP2-domain-containing protein; K07252 dolichyldiphosphatase [EC:3.6.1.43]	--	--	GO:0016021 integral component of membrane	gi|598006821|ref|XP_007370040.1|	protein [Dichomitus squalens LYAD-421 SS1] >gi|395324774|gb|EJF57208.1| PAP2-domain-containing protein [Dichomitus squalens LYAD-421 SS1]	dsq:DICSQDRAFT_69911	PAP2-domain-containing protein; K07252 dolichyldiphosphatase [EC:3.6.1.43]	--	--	GO:0016021 integral component of membrane
GL19875-G	302.15	83.2667	-1.85945	Down	0.861061	gi|598009897|ref|XP_007370893.1|	domain-containing protein [Dichomitus squalens LYAD-421 SS1] >gi|395323934|gb|EJF56386.1| FAD/NAD(P)-binding domain-containing protein [Dichomitus squalens LYAD-421 SS1]	dsq:DICSQDRAFT_113156	FAD/NAD(P)-binding domain-containing protein; K00480 salicylate hydroxylase [EC:1.14.13.1]	GO:0055114 oxidation-reduction process	GO:0071949 FAD binding | GO:0016491 oxidoreductase activity	--	gi|598009897|ref|XP_007370893.1|	domain-containing protein [Dichomitus squalens LYAD-421 SS1] >gi|395323934|gb|EJF56386.1| FAD/NAD(P)-binding domain-containing protein [Dichomitus squalens LYAD-421 SS1]	dsq:DICSQDRAFT_113156	FAD/NAD(P)-binding domain-containing protein; K00480 salicylate hydroxylase [EC:1.14.13.1]	GO:0055114 oxidation-reduction process	GO:0071949 FAD binding | GO:0016491 oxidoreductase activity	--
GL19911-G	83.1867	253.923	1.60997	Up	0.813575	gi|597994401|ref|XP_007366863.1|	protein DICSQDRAFT_155774 [Dichomitus squalens LYAD-421 SS1] >gi|395328050|gb|EJF60445.1| hypothetical protein DICSQDRAFT_155774 [Dichomitus squalens LYAD-421 SS1]	--	--	--	--	--	gi|597994401|ref|XP_007366863.1|	protein DICSQDRAFT_155774 [Dichomitus squalens LYAD-421 SS1] >gi|395328050|gb|EJF60445.1| hypothetical protein DICSQDRAFT_155774 [Dichomitus squalens LYAD-421 SS1]	--	--	--	--	--
GL19938-G	7.1	34.7333	2.29043	Up	0.807575	gi|597975757|ref|XP_007362062.1|	protein DICSQDRAFT_133045 [Dichomitus squalens LYAD-421 SS1] >gi|395333048|gb|EJF65426.1| hypothetical protein DICSQDRAFT_133045 [Dichomitus squalens LYAD-421 SS1]	dsq:DICSQDRAFT_133045	hypothetical protein; K15263 cell growth-regulating nucleolar protein	--	--	--	gi|597975757|ref|XP_007362062.1|	protein DICSQDRAFT_133045 [Dichomitus squalens LYAD-421 SS1] >gi|395333048|gb|EJF65426.1| hypothetical protein DICSQDRAFT_133045 [Dichomitus squalens LYAD-421 SS1]	dsq:DICSQDRAFT_133045	hypothetical protein; K15263 cell growth-regulating nucleolar protein	--	--	--
GL20002-G	32.11	112.543	1.80939	Up	0.830563	gi|597975637|ref|XP_007362032.1|	protein DICSQDRAFT_133007 [Dichomitus squalens LYAD-421 SS1] >gi|395333018|gb|EJF65396.1| hypothetical protein DICSQDRAFT_133007 [Dichomitus squalens LYAD-421 SS1]	--	--	--	--	--	gi|597975637|ref|XP_007362032.1|	protein DICSQDRAFT_133007 [Dichomitus squalens LYAD-421 SS1] >gi|395333018|gb|EJF65396.1| hypothetical protein DICSQDRAFT_133007 [Dichomitus squalens LYAD-421 SS1]	--	--	--	--	--
GL20009-G	10.5167	119.74	3.50916	Up	0.953866	gi|597975475|ref|XP_007361988.1|	protein DICSQDRAFT_79429 [Dichomitus squalens LYAD-421 SS1] >gi|395332974|gb|EJF65352.1| hypothetical protein DICSQDRAFT_79429 [Dichomitus squalens LYAD-421 SS1]	wic:J056_004272	Recombining binding protein suppressor of hairless-like protein; K06053 recombining binding protein suppressor of hairless	GO:0006357 regulation of transcription from RNA polymerase II promoter	GO:0000978 RNA polymerase II core promoter proximal region sequence-specific DNA binding | GO:0000982 transcription factor activity, RNA polymerase II core promoter proximal region sequence-specific binding	GO:0005634 nucleus	gi|597975475|ref|XP_007361988.1|	protein DICSQDRAFT_79429 [Dichomitus squalens LYAD-421 SS1] >gi|395332974|gb|EJF65352.1| hypothetical protein DICSQDRAFT_79429 [Dichomitus squalens LYAD-421 SS1]	wic:J056_004272	Recombining binding protein suppressor of hairless-like protein; K06053 recombining binding protein suppressor of hairless	GO:0006357 regulation of transcription from RNA polymerase II promoter	GO:0000978 RNA polymerase II core promoter proximal region sequence-specific DNA binding | GO:0000982 transcription factor activity, RNA polymerase II core promoter proximal region sequence-specific binding	GO:0005634 nucleus
GL20165-G	4.63667	36.8633	2.99103	Up	0.86005	gi|636606345|ref|XP_008034307.1|	protein TRAVEDRAFT_69113 [Trametes versicolor FP-101664 SS1] >gi|392569731|gb|EIW62904.1| hypothetical protein TRAVEDRAFT_69113 [Trametes versicolor FP-101664 SS1]	--	--	--	--	--	gi|636606345|ref|XP_008034307.1|	protein TRAVEDRAFT_69113 [Trametes versicolor FP-101664 SS1] >gi|392569731|gb|EIW62904.1| hypothetical protein TRAVEDRAFT_69113 [Trametes versicolor FP-101664 SS1]	--	--	--	--	--
GL20168-G	6.15333	36.78	2.57948	Up	0.838243	gi|597974637|ref|XP_007361763.1|	protein DICSQDRAFT_51829 [Dichomitus squalens LYAD-421 SS1] >gi|395332749|gb|EJF65127.1| hypothetical protein DICSQDRAFT_51829 [Dichomitus squalens LYAD-421 SS1]	--	--	--	--	--	gi|597974637|ref|XP_007361763.1|	protein DICSQDRAFT_51829 [Dichomitus squalens LYAD-421 SS1] >gi|395332749|gb|EJF65127.1| hypothetical protein DICSQDRAFT_51829 [Dichomitus squalens LYAD-421 SS1]	--	--	--	--	--
GL20172-G	26.2667	120.787	2.20116	Up	0.887357	gi|597974607|ref|XP_007361755.1|	protein DICSQDRAFT_51405 [Dichomitus squalens LYAD-421 SS1] >gi|395332741|gb|EJF65119.1| hypothetical protein DICSQDRAFT_51405 [Dichomitus squalens LYAD-421 SS1]	dsq:DICSQDRAFT_51405	hypothetical protein; K14816 pre-60S factor REI1	--	GO:0008270 zinc ion binding | GO:0003676 nucleic acid binding	--	gi|597974607|ref|XP_007361755.1|	protein DICSQDRAFT_51405 [Dichomitus squalens LYAD-421 SS1] >gi|395332741|gb|EJF65119.1| hypothetical protein DICSQDRAFT_51405 [Dichomitus squalens LYAD-421 SS1]	dsq:DICSQDRAFT_51405	hypothetical protein; K14816 pre-60S factor REI1	--	GO:0008270 zinc ion binding | GO:0003676 nucleic acid binding	--
GL20190-G	15.2867	95.8933	2.64916	Up	0.914061	gi|598004735|ref|XP_007369576.1|	protein DICSQDRAFT_183033 [Dichomitus squalens LYAD-421 SS1] >gi|395325178|gb|EJF57604.1| hypothetical protein DICSQDRAFT_183033 [Dichomitus squalens LYAD-421 SS1]	--	--	--	--	--	gi|598004735|ref|XP_007369576.1|	protein DICSQDRAFT_183033 [Dichomitus squalens LYAD-421 SS1] >gi|395325178|gb|EJF57604.1| hypothetical protein DICSQDRAFT_183033 [Dichomitus squalens LYAD-421 SS1]	--	--	--	--	--
GL20203-G	8.53667	48.9867	2.52064	Up	0.861914	gi|598002785|ref|XP_007369034.1|	protein DICSQDRAFT_182697 [Dichomitus squalens LYAD-421 SS1] >gi|395325799|gb|EJF58216.1| hypothetical protein DICSQDRAFT_182697 [Dichomitus squalens LYAD-421 SS1]	--	--	--	--	--	gi|598002785|ref|XP_007369034.1|	protein DICSQDRAFT_182697 [Dichomitus squalens LYAD-421 SS1] >gi|395325799|gb|EJF58216.1| hypothetical protein DICSQDRAFT_182697 [Dichomitus squalens LYAD-421 SS1]	--	--	--	--	--
GL20230-G	10.31	49.5133	2.26377	Up	0.841053	gi|597978047|ref|XP_007362644.1|	[Dichomitus squalens LYAD-421 SS1] >gi|395332469|gb|EJF64848.1| alpha/beta-hydrolase [Dichomitus squalens LYAD-421 SS1]	cci:CC1G_07089	lipase; K17900 lipase ATG15 [EC:3.1.1.3]	GO:0006629 lipid metabolic process	GO:0016787 hydrolase activity	--	gi|597978047|ref|XP_007362644.1|	[Dichomitus squalens LYAD-421 SS1] >gi|395332469|gb|EJF64848.1| alpha/beta-hydrolase [Dichomitus squalens LYAD-421 SS1]	cci:CC1G_07089	lipase; K17900 lipase ATG15 [EC:3.1.1.3]	GO:0006629 lipid metabolic process	GO:0016787 hydrolase activity	--
GL20231-G	15.68	62.1133	1.98598	Up	0.827846	gi|597978031|ref|XP_007362640.1|	protein DICSQDRAFT_133556 [Dichomitus squalens LYAD-421 SS1] >gi|395332465|gb|EJF64844.1| hypothetical protein DICSQDRAFT_133556 [Dichomitus squalens LYAD-421 SS1]	dsq:DICSQDRAFT_133556	hypothetical protein; K18587 ubiquinone biosynthesis protein COQ9	--	--	--	gi|597978031|ref|XP_007362640.1|	protein DICSQDRAFT_133556 [Dichomitus squalens LYAD-421 SS1] >gi|395332465|gb|EJF64844.1| hypothetical protein DICSQDRAFT_133556 [Dichomitus squalens LYAD-421 SS1]	dsq:DICSQDRAFT_133556	hypothetical protein; K18587 ubiquinone biosynthesis protein COQ9	--	--	--
GL20248-G	13.4233	113.56	3.08064	Up	0.940528	gi|597977409|ref|XP_007362482.1|	protein [Dichomitus squalens LYAD-421 SS1] >gi|395332307|gb|EJF64686.1| Maf1-domain-containing protein [Dichomitus squalens LYAD-421 SS1]	--	--	--	--	--	gi|597977409|ref|XP_007362482.1|	protein [Dichomitus squalens LYAD-421 SS1] >gi|395332307|gb|EJF64686.1| Maf1-domain-containing protein [Dichomitus squalens LYAD-421 SS1]	--	--	--	--	--
GL20266-G	35.2333	7.11	-2.30902	Down	0.810739	gi|691793612|emb|CDO71406.1|	protein BN946_scf184908.g164 [Trametes cinnabarina]	--	--	--	--	--	gi|691793612|emb|CDO71406.1|	protein BN946_scf184908.g164 [Trametes cinnabarina]	--	--	--	--	--
GL20280-G	131.317	408.257	1.63643	Up	0.826073	gi|636617079|ref|XP_008039674.1|	protein TRAVEDRAFT_126548 [Trametes versicolor FP-101664 SS1] >gi|392564326|gb|EIW57504.1| hypothetical protein TRAVEDRAFT_126548 [Trametes versicolor FP-101664 SS1]	--	--	--	--	--	gi|636617079|ref|XP_008039674.1|	protein TRAVEDRAFT_126548 [Trametes versicolor FP-101664 SS1] >gi|392564326|gb|EIW57504.1| hypothetical protein TRAVEDRAFT_126548 [Trametes versicolor FP-101664 SS1]	--	--	--	--	--
GL20400-G	148.207	32.6467	-2.1826	Down	0.891519	gi|597984453|ref|XP_007364284.1|	protein DICSQDRAFT_103317 [Dichomitus squalens LYAD-421 SS1] >gi|395330555|gb|EJF62938.1| hypothetical protein DICSQDRAFT_103317 [Dichomitus squalens LYAD-421 SS1]	dsq:DICSQDRAFT_103317	hypothetical protein; K02884 large subunit ribosomal protein L19	GO:0006412 translation	GO:0003735 structural constituent of ribosome	GO:0005840 ribosome	gi|597984453|ref|XP_007364284.1|	protein DICSQDRAFT_103317 [Dichomitus squalens LYAD-421 SS1] >gi|395330555|gb|EJF62938.1| hypothetical protein DICSQDRAFT_103317 [Dichomitus squalens LYAD-421 SS1]	dsq:DICSQDRAFT_103317	hypothetical protein; K02884 large subunit ribosomal protein L19	GO:0006412 translation	GO:0003735 structural constituent of ribosome	GO:0005840 ribosome
GL20405-G	36.6767	185.667	2.33978	Up	0.911409	gi|597984283|ref|XP_007364242.1|	machinery component, partial [Dichomitus squalens LYAD-421 SS1] >gi|395330513|gb|EJF62896.1| translational machinery component, partial [Dichomitus squalens LYAD-421 SS1]	dsq:DICSQDRAFT_36677	translational machinery component; K02948 small subunit ribosomal protein S11	--	--	--	gi|597984283|ref|XP_007364242.1|	machinery component, partial [Dichomitus squalens LYAD-421 SS1] >gi|395330513|gb|EJF62896.1| translational machinery component, partial [Dichomitus squalens LYAD-421 SS1]	dsq:DICSQDRAFT_36677	translational machinery component; K02948 small subunit ribosomal protein S11	--	--	--
GL20411-G	4.45333	29.5833	2.73183	Up	0.820743	gi|597984073|ref|XP_007364188.1|	sulfite reductase [Dichomitus squalens LYAD-421 SS1] >gi|395330459|gb|EJF62842.1| assimilatory sulfite reductase [Dichomitus squalens LYAD-421 SS1]	dsq:DICSQDRAFT_135108	assimilatory sulfite reductase; K00380 sulfite reductase (NADPH) flavoprotein alpha-component [EC:1.8.1.2]	GO:0055114 oxidation-reduction process	GO:0016903 oxidoreductase activity, acting on the aldehyde or oxo group of donors	--	gi|597984073|ref|XP_007364188.1|	sulfite reductase [Dichomitus squalens LYAD-421 SS1] >gi|395330459|gb|EJF62842.1| assimilatory sulfite reductase [Dichomitus squalens LYAD-421 SS1]	dsq:DICSQDRAFT_135108	assimilatory sulfite reductase; K00380 sulfite reductase (NADPH) flavoprotein alpha-component [EC:1.8.1.2]	GO:0055114 oxidation-reduction process	GO:0016903 oxidoreductase activity, acting on the aldehyde or oxo group of donors	--
GL20412-G	8.84333	42.27	2.25697	Up	0.826086	gi|636607379|ref|XP_008034824.1|	protein TRAVEDRAFT_27260 [Trametes versicolor FP-101664 SS1] >gi|392568606|gb|EIW61780.1| hypothetical protein TRAVEDRAFT_27260 [Trametes versicolor FP-101664 SS1]	--	--	--	--	--	gi|636607379|ref|XP_008034824.1|	protein TRAVEDRAFT_27260 [Trametes versicolor FP-101664 SS1] >gi|392568606|gb|EIW61780.1| hypothetical protein TRAVEDRAFT_27260 [Trametes versicolor FP-101664 SS1]	--	--	--	--	--
GL20421-G	7.58333	77.4967	3.35323	Up	0.931968	gi|597996007|ref|XP_007367275.1|	P450 [Dichomitus squalens LYAD-421 SS1] >gi|395327664|gb|EJF60062.1| cytochrome P450 [Dichomitus squalens LYAD-421 SS1]	fpu:FPSE_05313	hypothetical protein; K16261 yeast amino acid transporter	GO:0055114 oxidation-reduction process	GO:0020037 heme binding | GO:0016705 oxidoreductase activity, acting on paired donors, with incorporation or reduction of molecular oxygen | GO:0004497 monooxygenase activity | GO:0005506 iron ion binding	GO:0016021 integral component of membrane	gi|597996007|ref|XP_007367275.1|	P450 [Dichomitus squalens LYAD-421 SS1] >gi|395327664|gb|EJF60062.1| cytochrome P450 [Dichomitus squalens LYAD-421 SS1]	fpu:FPSE_05313	hypothetical protein; K16261 yeast amino acid transporter	GO:0055114 oxidation-reduction process	GO:0020037 heme binding | GO:0016705 oxidoreductase activity, acting on paired donors, with incorporation or reduction of molecular oxygen | GO:0004497 monooxygenase activity | GO:0005506 iron ion binding	GO:0016021 integral component of membrane
GL20424-G	11.2	51.0567	2.16729	Up	0.83416	--	--	--	--	--	--	--	--	--	--	--	--	--	--
GL20441-G	23.6533	108.547	2.1982	Up	0.883537	gi|597985159|ref|XP_007364466.1|	protein DICSQDRAFT_84063 [Dichomitus squalens LYAD-421 SS1] >gi|395330737|gb|EJF63120.1| hypothetical protein DICSQDRAFT_84063 [Dichomitus squalens LYAD-421 SS1]	mlr:MELLADRAFT_89359	hypothetical protein; K14300 nuclear pore complex protein Nup133	--	GO:0003676 nucleic acid binding | GO:0000166 nucleotide binding	--	gi|597985159|ref|XP_007364466.1|	protein DICSQDRAFT_84063 [Dichomitus squalens LYAD-421 SS1] >gi|395330737|gb|EJF63120.1| hypothetical protein DICSQDRAFT_84063 [Dichomitus squalens LYAD-421 SS1]	mlr:MELLADRAFT_89359	hypothetical protein; K14300 nuclear pore complex protein Nup133	--	GO:0003676 nucleic acid binding | GO:0000166 nucleotide binding	--
GL20442-G	15.0933	90.9733	2.59153	Up	0.908166	--	--	--	--	--	--	--	--	--	--	--	--	--	--
GL20448-G	87.7533	407.543	2.21543	Up	0.910989	gi|597984985|ref|XP_007364421.1|	protein DICSQDRAFT_56782 [Dichomitus squalens LYAD-421 SS1] >gi|395330692|gb|EJF63075.1| hypothetical protein DICSQDRAFT_56782 [Dichomitus squalens LYAD-421 SS1]	--	--	--	--	--	gi|597984985|ref|XP_007364421.1|	protein DICSQDRAFT_56782 [Dichomitus squalens LYAD-421 SS1] >gi|395330692|gb|EJF63075.1| hypothetical protein DICSQDRAFT_56782 [Dichomitus squalens LYAD-421 SS1]	--	--	--	--	--
GL20455-G	16.29	90.45	2.47313	Up	0.899212	gi|597984623|ref|XP_007364329.1|	protein DICSQDRAFT_154199 [Dichomitus squalens LYAD-421 SS1] >gi|395330600|gb|EJF62983.1| hypothetical protein DICSQDRAFT_154199 [Dichomitus squalens LYAD-421 SS1]	--	--	--	--	--	gi|597984623|ref|XP_007364329.1|	protein DICSQDRAFT_154199 [Dichomitus squalens LYAD-421 SS1] >gi|395330600|gb|EJF62983.1| hypothetical protein DICSQDRAFT_154199 [Dichomitus squalens LYAD-421 SS1]	--	--	--	--	--
GL20460-G	109.357	526.067	2.2662	Up	0.917592	gi|597996195|ref|XP_007367323.1|	protein [Dichomitus squalens LYAD-421 SS1] >gi|395327461|gb|EJF59860.1| Pkinase-domain-containing protein [Dichomitus squalens LYAD-421 SS1]	yli:YALI0E27632g	YALI0E27632p; K08794 calcium/calmodulin-dependent protein kinase I [EC:2.7.11.17]	GO:0006468 protein phosphorylation	GO:0005524 ATP binding | GO:0004674 protein serine/threonine kinase activity	--	gi|597996195|ref|XP_007367323.1|	protein [Dichomitus squalens LYAD-421 SS1] >gi|395327461|gb|EJF59860.1| Pkinase-domain-containing protein [Dichomitus squalens LYAD-421 SS1]	yli:YALI0E27632g	YALI0E27632p; K08794 calcium/calmodulin-dependent protein kinase I [EC:2.7.11.17]	GO:0006468 protein phosphorylation	GO:0005524 ATP binding | GO:0004674 protein serine/threonine kinase activity	--
GL20462-G	8.9	50.9733	2.51787	Up	0.865275	gi|636625009|ref|XP_008043639.1|	protein TRAVEDRAFT_66892 [Trametes versicolor FP-101664 SS1] >gi|392560036|gb|EIW53219.1| hypothetical protein TRAVEDRAFT_66892 [Trametes versicolor FP-101664 SS1]	dsq:DICSQDRAFT_64143	hypothetical protein; K14308 nuclear pore complex protein Nup54	--	--	GO:0005643 nuclear pore	gi|636625009|ref|XP_008043639.1|	protein TRAVEDRAFT_66892 [Trametes versicolor FP-101664 SS1] >gi|392560036|gb|EIW53219.1| hypothetical protein TRAVEDRAFT_66892 [Trametes versicolor FP-101664 SS1]	dsq:DICSQDRAFT_64143	hypothetical protein; K14308 nuclear pore complex protein Nup54	--	--	GO:0005643 nuclear pore
GL20480-G	32.0833	149.553	2.22076	Up	0.895746	gi|598008575|ref|XP_007370581.1|	protein sorting-associated protein 26 [Dichomitus squalens LYAD-421 SS1] >gi|395324274|gb|EJF56718.1| vacuolar protein sorting-associated protein 26 [Dichomitus squalens LYAD-421 SS1]	dsq:DICSQDRAFT_112749	vacuolar protein sorting-associated protein 26; K18466 vacuolar protein sorting-associated protein 26	--	--	--	gi|598008575|ref|XP_007370581.1|	protein sorting-associated protein 26 [Dichomitus squalens LYAD-421 SS1] >gi|395324274|gb|EJF56718.1| vacuolar protein sorting-associated protein 26 [Dichomitus squalens LYAD-421 SS1]	dsq:DICSQDRAFT_112749	vacuolar protein sorting-associated protein 26; K18466 vacuolar protein sorting-associated protein 26	--	--	--
GL20499-G	10.02	43.4333	2.11592	Up	0.8141	gi|598002573|ref|XP_007368975.1|	protein DICSQDRAFT_110426 [Dichomitus squalens LYAD-421 SS1] >gi|395325879|gb|EJF58295.1| hypothetical protein DICSQDRAFT_110426 [Dichomitus squalens LYAD-421 SS1]	--	--	--	--	GO:0016021 integral component of membrane	gi|598002573|ref|XP_007368975.1|	protein DICSQDRAFT_110426 [Dichomitus squalens LYAD-421 SS1] >gi|395325879|gb|EJF58295.1| hypothetical protein DICSQDRAFT_110426 [Dichomitus squalens LYAD-421 SS1]	--	--	--	--	GO:0016021 integral component of membrane
GL20522-G	44.8367	188.963	2.07536	Up	0.885913	gi|691786332|emb|CDO76773.1|	protein BN946_scf184978.g2 [Trametes cinnabarina]	--	--	--	--	--	gi|691786332|emb|CDO76773.1|	protein BN946_scf184978.g2 [Trametes cinnabarina]	--	--	--	--	--
GL20536-G	25.45	114.107	2.16465	Up	0.88057	gi|597996175|ref|XP_007367318.1|	protein DICSQDRAFT_171588 [Dichomitus squalens LYAD-421 SS1] >gi|395327456|gb|EJF59855.1| hypothetical protein DICSQDRAFT_171588 [Dichomitus squalens LYAD-421 SS1]	--	--	--	--	--	gi|597996175|ref|XP_007367318.1|	protein DICSQDRAFT_171588 [Dichomitus squalens LYAD-421 SS1] >gi|395327456|gb|EJF59855.1| hypothetical protein DICSQDRAFT_171588 [Dichomitus squalens LYAD-421 SS1]	--	--	--	--	--
GL20564-G	10.0867	77.7733	2.94683	Up	0.918144	gi|597996433|ref|XP_007367387.1|	protein [Dichomitus squalens LYAD-421 SS1] >gi|395327525|gb|EJF59924.1| HET-domain-containing protein [Dichomitus squalens LYAD-421 SS1]	afv:AFLA_005130	L-lysine 2,3-aminomutase, putative; K01843 lysine 2,3-aminomutase [EC:5.4.3.2]	--	--	--	gi|597996433|ref|XP_007367387.1|	protein [Dichomitus squalens LYAD-421 SS1] >gi|395327525|gb|EJF59924.1| HET-domain-containing protein [Dichomitus squalens LYAD-421 SS1]	afv:AFLA_005130	L-lysine 2,3-aminomutase, putative; K01843 lysine 2,3-aminomutase [EC:5.4.3.2]	--	--	--
GL20584-G	64.3733	226.313	1.81379	Up	0.848444	gi|597996111|ref|XP_007367301.1|	containing nucleoside triphosphate hydrolase protein [Dichomitus squalens LYAD-421 SS1] >gi|395327439|gb|EJF59838.1| P-loop containing nucleoside triphosphate hydrolase protein [Dichomitus squalens LYAD-421 SS1]	ela:UCREL1_7820	putative inositol oxygenase 1 protein; K00469 inositol oxygenase [EC:1.13.99.1]	GO:0008152 metabolic process	GO:0005524 ATP binding | GO:0016787 hydrolase activity	--	gi|597996111|ref|XP_007367301.1|	containing nucleoside triphosphate hydrolase protein [Dichomitus squalens LYAD-421 SS1] >gi|395327439|gb|EJF59838.1| P-loop containing nucleoside triphosphate hydrolase protein [Dichomitus squalens LYAD-421 SS1]	ela:UCREL1_7820	putative inositol oxygenase 1 protein; K00469 inositol oxygenase [EC:1.13.99.1]	GO:0008152 metabolic process	GO:0005524 ATP binding | GO:0016787 hydrolase activity	--
GL20585-G	20.7067	77.7867	1.90943	Up	0.829894	gi|598008519|ref|XP_007370567.1|	protein [Dichomitus squalens LYAD-421 SS1] >gi|395324260|gb|EJF56704.1| plus-3-domain-containing protein [Dichomitus squalens LYAD-421 SS1]	dsq:DICSQDRAFT_70935	plus-3-domain-containing protein; K15178 RNA polymerase-associated protein RTF1	GO:0006368 transcription elongation from RNA polymerase II promoter | GO:0016570 histone modification	GO:0003677 DNA binding	GO:0016593 Cdc73/Paf1 complex	gi|598008519|ref|XP_007370567.1|	protein [Dichomitus squalens LYAD-421 SS1] >gi|395324260|gb|EJF56704.1| plus-3-domain-containing protein [Dichomitus squalens LYAD-421 SS1]	dsq:DICSQDRAFT_70935	plus-3-domain-containing protein; K15178 RNA polymerase-associated protein RTF1	GO:0006368 transcription elongation from RNA polymerase II promoter | GO:0016570 histone modification	GO:0003677 DNA binding	GO:0016593 Cdc73/Paf1 complex
GL20593-G	3.67333	28.58	2.95984	Up	0.827859	gi|598008551|ref|XP_007370575.1|	ligase molybdopterin-converting factor [Dichomitus squalens LYAD-421 SS1] >gi|395324268|gb|EJF56712.1| ubiquitin-protein ligase molybdopterin-converting factor [Dichomitus squalens LYAD-421 SS1]	shs:STEHIDRAFT_72967	hypothetical protein; K11996 adenylyltransferase and sulfurtransferase [EC:2.7.7.80 2.8.1.11]	GO:0008152 metabolic process	GO:0008641 small protein activating enzyme activity	GO:0016021 integral component of membrane	gi|598008551|ref|XP_007370575.1|	ligase molybdopterin-converting factor [Dichomitus squalens LYAD-421 SS1] >gi|395324268|gb|EJF56712.1| ubiquitin-protein ligase molybdopterin-converting factor [Dichomitus squalens LYAD-421 SS1]	shs:STEHIDRAFT_72967	hypothetical protein; K11996 adenylyltransferase and sulfurtransferase [EC:2.7.7.80 2.8.1.11]	GO:0008152 metabolic process	GO:0008641 small protein activating enzyme activity	GO:0016021 integral component of membrane
GL20607-G	236.373	703.893	1.57429	Up	0.814231	gi|598012273|ref|XP_007371463.1|	protein DICSQDRAFT_184179 [Dichomitus squalens LYAD-421 SS1] >gi|395323308|gb|EJF55785.1| hypothetical protein DICSQDRAFT_184179 [Dichomitus squalens LYAD-421 SS1]	--	--	--	--	--	gi|598012273|ref|XP_007371463.1|	protein DICSQDRAFT_184179 [Dichomitus squalens LYAD-421 SS1] >gi|395323308|gb|EJF55785.1| hypothetical protein DICSQDRAFT_184179 [Dichomitus squalens LYAD-421 SS1]	--	--	--	--	--
GL20626-G	10.44	46.8967	2.16736	Up	0.826756	gi|598002603|ref|XP_007368984.1|	protein DICSQDRAFT_182670 [Dichomitus squalens LYAD-421 SS1] >gi|395325888|gb|EJF58304.1| hypothetical protein DICSQDRAFT_182670 [Dichomitus squalens LYAD-421 SS1]	--	--	--	--	--	gi|598002603|ref|XP_007368984.1|	protein DICSQDRAFT_182670 [Dichomitus squalens LYAD-421 SS1] >gi|395325888|gb|EJF58304.1| hypothetical protein DICSQDRAFT_182670 [Dichomitus squalens LYAD-421 SS1]	--	--	--	--	--
GL20633-G	11.65	48.3367	2.05279	Up	0.816043	gi|597996499|ref|XP_007367403.1|	dependent oxidoreductase [Dichomitus squalens LYAD-421 SS1] >gi|395327541|gb|EJF59940.1| FAD dependent oxidoreductase [Dichomitus squalens LYAD-421 SS1]	--	--	GO:0055114 oxidation-reduction process	GO:0016491 oxidoreductase activity	GO:0016021 integral component of membrane	gi|597996499|ref|XP_007367403.1|	dependent oxidoreductase [Dichomitus squalens LYAD-421 SS1] >gi|395327541|gb|EJF59940.1| FAD dependent oxidoreductase [Dichomitus squalens LYAD-421 SS1]	--	--	GO:0055114 oxidation-reduction process	GO:0016491 oxidoreductase activity	GO:0016021 integral component of membrane
GL20648-G	2668.43	902.633	-1.56378	Down	0.816555	gi|564733379|gb|AHC00612.1|	[Ganoderma lucidum]	dsq:DICSQDRAFT_138106	peptidyl-prolyl cis-trans isomerase; K05864 peptidyl-prolyl isomerase D [EC:5.2.1.8]	GO:0006457 protein folding | GO:0000413 protein peptidyl-prolyl isomerization	GO:0003755 peptidyl-prolyl cis-trans isomerase activity	--	gi|564733379|gb|AHC00612.1|	[Ganoderma lucidum]	dsq:DICSQDRAFT_138106	peptidyl-prolyl cis-trans isomerase; K05864 peptidyl-prolyl isomerase D [EC:5.2.1.8]	GO:0006457 protein folding | GO:0000413 protein peptidyl-prolyl isomerization	GO:0003755 peptidyl-prolyl cis-trans isomerase activity	--
GL20675-G	30.78	158.617	2.36548	Up	0.910332	gi|597985907|ref|XP_007364657.1|	protein [Dichomitus squalens LYAD-421 SS1] >gi|395330200|gb|EJF62584.1| LETM1-domain-containing protein [Dichomitus squalens LYAD-421 SS1]	dsq:DICSQDRAFT_84405	LETM1-domain-containing protein; K17800 LETM1 and EF-hand domain-containing protein 1, mitochondrial	--	GO:0043022 ribosome binding | GO:0005509 calcium ion binding	GO:0016021 integral component of membrane	gi|597985907|ref|XP_007364657.1|	protein [Dichomitus squalens LYAD-421 SS1] >gi|395330200|gb|EJF62584.1| LETM1-domain-containing protein [Dichomitus squalens LYAD-421 SS1]	dsq:DICSQDRAFT_84405	LETM1-domain-containing protein; K17800 LETM1 and EF-hand domain-containing protein 1, mitochondrial	--	GO:0043022 ribosome binding | GO:0005509 calcium ion binding	GO:0016021 integral component of membrane
GL20678-G	17.3867	62.4533	1.8448	Up	0.805146	gi|597985877|ref|XP_007364649.1|	protein DICSQDRAFT_57884 [Dichomitus squalens LYAD-421 SS1] >gi|395330192|gb|EJF62576.1| hypothetical protein DICSQDRAFT_57884 [Dichomitus squalens LYAD-421 SS1]	vpo:Kpol_1054p3	hypothetical protein ; K18170 complex III assembly factor LYRM7	GO:0006415 translational termination	GO:0016810 hydrolase activity, acting on carbon-nitrogen (but not peptide) bonds | GO:0003747 translation release factor activity	--	gi|597985877|ref|XP_007364649.1|	protein DICSQDRAFT_57884 [Dichomitus squalens LYAD-421 SS1] >gi|395330192|gb|EJF62576.1| hypothetical protein DICSQDRAFT_57884 [Dichomitus squalens LYAD-421 SS1]	vpo:Kpol_1054p3	hypothetical protein ; K18170 complex III assembly factor LYRM7	GO:0006415 translational termination	GO:0016810 hydrolase activity, acting on carbon-nitrogen (but not peptide) bonds | GO:0003747 translation release factor activity	--
GL20679-G	24.36	126.873	2.3808	Up	0.905619	gi|597986037|ref|XP_007364691.1|	protein DICSQDRAFT_84465 [Dichomitus squalens LYAD-421 SS1] >gi|395330234|gb|EJF62618.1| hypothetical protein DICSQDRAFT_84465 [Dichomitus squalens LYAD-421 SS1]	dsq:DICSQDRAFT_84465	hypothetical protein; K17065 dynamin 1-like protein [EC:3.6.5.5]	GO:0006623 protein targeting to vacuole | GO:0008152 metabolic process | GO:0007031 peroxisome organization | GO:0030036 actin cytoskeleton organization	GO:0005525 GTP binding | GO:0003924 GTPase activity	GO:0005622 intracellular	gi|597986037|ref|XP_007364691.1|	protein DICSQDRAFT_84465 [Dichomitus squalens LYAD-421 SS1] >gi|395330234|gb|EJF62618.1| hypothetical protein DICSQDRAFT_84465 [Dichomitus squalens LYAD-421 SS1]	dsq:DICSQDRAFT_84465	hypothetical protein; K17065 dynamin 1-like protein [EC:3.6.5.5]	GO:0006623 protein targeting to vacuole | GO:0008152 metabolic process | GO:0007031 peroxisome organization | GO:0030036 actin cytoskeleton organization	GO:0005525 GTP binding | GO:0003924 GTPase activity	GO:0005622 intracellular
GL20686-G	18.4467	97.6667	2.40451	Up	0.896784	gi|597986109|ref|XP_007364710.1|	protein DICSQDRAFT_160966 [Dichomitus squalens LYAD-421 SS1] >gi|395330253|gb|EJF62637.1| hypothetical protein DICSQDRAFT_160966 [Dichomitus squalens LYAD-421 SS1]	dsq:DICSQDRAFT_160966	hypothetical protein; K10643 CCR4-NOT transcription complex subunit 4 [EC:2.3.2.27]	--	GO:0003677 DNA binding	--	gi|597986109|ref|XP_007364710.1|	protein DICSQDRAFT_160966 [Dichomitus squalens LYAD-421 SS1] >gi|395330253|gb|EJF62637.1| hypothetical protein DICSQDRAFT_160966 [Dichomitus squalens LYAD-421 SS1]	dsq:DICSQDRAFT_160966	hypothetical protein; K10643 CCR4-NOT transcription complex subunit 4 [EC:2.3.2.27]	--	GO:0003677 DNA binding	--
GL20693-G	7.25333	43.28	2.57698	Up	0.855402	gi|564733365|gb|AHC00605.1|	protein kinase [Ganoderma lucidum]	dsq:DICSQDRAFT_141385	mitogen-activated protein kinase; K04371 mitogen-activated protein kinase 1/3 [EC:2.7.11.24]	GO:0000165 MAPK cascade	GO:0004707 MAP kinase activity | GO:0005524 ATP binding	GO:0005622 intracellular	gi|564733365|gb|AHC00605.1|	protein kinase [Ganoderma lucidum]	dsq:DICSQDRAFT_141385	mitogen-activated protein kinase; K04371 mitogen-activated protein kinase 1/3 [EC:2.7.11.24]	GO:0000165 MAPK cascade	GO:0004707 MAP kinase activity | GO:0005524 ATP binding	GO:0005622 intracellular
GL20699-G	3.98667	30.56	2.93839	Up	0.835998	--	--	--	--	--	--	--	--	--	--	--	--	--	--
GL20700-G	29.7233	112.933	1.9258	Up	0.849691	gi|598003749|ref|XP_007369310.1|	C14 [Dichomitus squalens LYAD-421 SS1] >gi|395325514|gb|EJF57935.1| peptidase C14 [Dichomitus squalens LYAD-421 SS1]	--	--	--	--	--	gi|598003749|ref|XP_007369310.1|	C14 [Dichomitus squalens LYAD-421 SS1] >gi|395325514|gb|EJF57935.1| peptidase C14 [Dichomitus squalens LYAD-421 SS1]	--	--	--	--	--
GL20705-G	23.7167	79.82	1.75085	Up	0.805763	gi|691794520|emb|CDO70502.1|	protein BN946_scf184569.g45 [Trametes cinnabarina]	bze:COCCADRAFT_90306	hypothetical protein; K13431 signal recognition particle receptor subunit alpha	--	--	GO:0016020 membrane	gi|691794520|emb|CDO70502.1|	protein BN946_scf184569.g45 [Trametes cinnabarina]	bze:COCCADRAFT_90306	hypothetical protein; K13431 signal recognition particle receptor subunit alpha	--	--	GO:0016020 membrane
GL20707-G	126.677	26.9967	-2.2303	Down	0.892136	gi|598011903|ref|XP_007371376.1|	protein DICSQDRAFT_130399 [Dichomitus squalens LYAD-421 SS1] >gi|395323423|gb|EJF55895.1| hypothetical protein DICSQDRAFT_130399 [Dichomitus squalens LYAD-421 SS1]	--	--	--	--	--	gi|598011903|ref|XP_007371376.1|	protein DICSQDRAFT_130399 [Dichomitus squalens LYAD-421 SS1] >gi|395323423|gb|EJF55895.1| hypothetical protein DICSQDRAFT_130399 [Dichomitus squalens LYAD-421 SS1]	--	--	--	--	--
GL20710-G	6.94667	60.5067	3.1227	Up	0.909794	gi|598005887|ref|XP_007369890.1|	protein DICSQDRAFT_69568 [Dichomitus squalens LYAD-421 SS1] >gi|395324955|gb|EJF57386.1| hypothetical protein DICSQDRAFT_69568 [Dichomitus squalens LYAD-421 SS1]	--	--	--	GO:0046983 protein dimerization activity	--	gi|598005887|ref|XP_007369890.1|	protein DICSQDRAFT_69568 [Dichomitus squalens LYAD-421 SS1] >gi|395324955|gb|EJF57386.1| hypothetical protein DICSQDRAFT_69568 [Dichomitus squalens LYAD-421 SS1]	--	--	--	GO:0046983 protein dimerization activity	--
GL20711-G	17.59	90.2933	2.35986	Up	0.889852	gi|598005827|ref|XP_007369871.1|	protein DICSQDRAFT_157394 [Dichomitus squalens LYAD-421 SS1] >gi|395324936|gb|EJF57367.1| hypothetical protein DICSQDRAFT_157394 [Dichomitus squalens LYAD-421 SS1]	--	--	--	--	GO:0016021 integral component of membrane	gi|598005827|ref|XP_007369871.1|	protein DICSQDRAFT_157394 [Dichomitus squalens LYAD-421 SS1] >gi|395324936|gb|EJF57367.1| hypothetical protein DICSQDRAFT_157394 [Dichomitus squalens LYAD-421 SS1]	--	--	--	--	GO:0016021 integral component of membrane
GL20712-G	63.0333	7.95	-2.98709	Down	0.907615	gi|598005933|ref|XP_007369902.1|	monooxygenase [Dichomitus squalens LYAD-421 SS1] >gi|395324967|gb|EJF57398.1| CyP450 monooxygenase [Dichomitus squalens LYAD-421 SS1]	fme:FOMMEDRAFT_143001	cytochrome P450 oxidoreductase OrdA-like protein; K21295 multifunctional cytochrome P450 monooxygenase	--	GO:0046872 metal ion binding | GO:0016491 oxidoreductase activity	GO:0016020 membrane	gi|598005933|ref|XP_007369902.1|	monooxygenase [Dichomitus squalens LYAD-421 SS1] >gi|395324967|gb|EJF57398.1| CyP450 monooxygenase [Dichomitus squalens LYAD-421 SS1]	fme:FOMMEDRAFT_143001	cytochrome P450 oxidoreductase OrdA-like protein; K21295 multifunctional cytochrome P450 monooxygenase	--	GO:0046872 metal ion binding | GO:0016491 oxidoreductase activity	GO:0016020 membrane
GL20717-G	5.10667	48.28	3.24097	Up	0.896403	gi|598005849|ref|XP_007369880.1|	protein DICSQDRAFT_69652 [Dichomitus squalens LYAD-421 SS1] >gi|395324945|gb|EJF57376.1| hypothetical protein DICSQDRAFT_69652 [Dichomitus squalens LYAD-421 SS1]	dsq:DICSQDRAFT_69652	hypothetical protein; K03457 nucleobase:cation symporter-1, NCS1 family	GO:0055085 transmembrane transport	GO:0005215 transporter activity	GO:0016021 integral component of membrane	gi|598005849|ref|XP_007369880.1|	protein DICSQDRAFT_69652 [Dichomitus squalens LYAD-421 SS1] >gi|395324945|gb|EJF57376.1| hypothetical protein DICSQDRAFT_69652 [Dichomitus squalens LYAD-421 SS1]	dsq:DICSQDRAFT_69652	hypothetical protein; K03457 nucleobase:cation symporter-1, NCS1 family	GO:0055085 transmembrane transport	GO:0005215 transporter activity	GO:0016021 integral component of membrane
GL20718-G	40.7267	191.197	2.23101	Up	0.902153	gi|636622597|ref|XP_008042433.1|	protein TRAVEDRAFT_66528 [Trametes versicolor FP-101664 SS1] >gi|392562094|gb|EIW55275.1| hypothetical protein TRAVEDRAFT_66528 [Trametes versicolor FP-101664 SS1]	dsq:DICSQDRAFT_111820	hypothetical protein; K08498 syntaxin 6	GO:0048193 Golgi vesicle transport	--	GO:0016021 integral component of membrane | GO:0005622 intracellular	gi|636622597|ref|XP_008042433.1|	protein TRAVEDRAFT_66528 [Trametes versicolor FP-101664 SS1] >gi|392562094|gb|EIW55275.1| hypothetical protein TRAVEDRAFT_66528 [Trametes versicolor FP-101664 SS1]	dsq:DICSQDRAFT_111820	hypothetical protein; K08498 syntaxin 6	GO:0048193 Golgi vesicle transport	--	GO:0016021 integral component of membrane | GO:0005622 intracellular
GL20719-G	36.7233	116.707	1.66812	Up	0.807982	gi|598005835|ref|XP_007369875.1|	protein DICSQDRAFT_163437 [Dichomitus squalens LYAD-421 SS1] >gi|395324940|gb|EJF57371.1| hypothetical protein DICSQDRAFT_163437 [Dichomitus squalens LYAD-421 SS1]	--	--	--	--	--	gi|598005835|ref|XP_007369875.1|	protein DICSQDRAFT_163437 [Dichomitus squalens LYAD-421 SS1] >gi|395324940|gb|EJF57371.1| hypothetical protein DICSQDRAFT_163437 [Dichomitus squalens LYAD-421 SS1]	--	--	--	--	--
GL20729-G	17.6733	67.4867	1.93303	Up	0.823789	gi|598004247|ref|XP_007369440.1|	protein [Dichomitus squalens LYAD-421 SS1] >gi|395325389|gb|EJF57812.1| HD-domain/PDEase-like protein [Dichomitus squalens LYAD-421 SS1]	mpr:MPER_09418	hypothetical protein ; K01120 3',5'-cyclic-nucleotide phosphodiesterase [EC:3.1.4.17]	GO:0008152 metabolic process | GO:0007165 signal transduction	GO:0046872 metal ion binding | GO:0004114 3',5'-cyclic-nucleotide phosphodiesterase activity	--	gi|598004247|ref|XP_007369440.1|	protein [Dichomitus squalens LYAD-421 SS1] >gi|395325389|gb|EJF57812.1| HD-domain/PDEase-like protein [Dichomitus squalens LYAD-421 SS1]	mpr:MPER_09418	hypothetical protein ; K01120 3',5'-cyclic-nucleotide phosphodiesterase [EC:3.1.4.17]	GO:0008152 metabolic process | GO:0007165 signal transduction	GO:0046872 metal ion binding | GO:0004114 3',5'-cyclic-nucleotide phosphodiesterase activity	--
GL20732-G	401.067	44.8967	-3.15916	Down	0.965262	gi|597986771|ref|XP_007364883.1|	protein DICSQDRAFT_169199 [Dichomitus squalens LYAD-421 SS1] >gi|395329786|gb|EJF62171.1| hypothetical protein DICSQDRAFT_169199 [Dichomitus squalens LYAD-421 SS1]	--	--	--	--	--	gi|597986771|ref|XP_007364883.1|	protein DICSQDRAFT_169199 [Dichomitus squalens LYAD-421 SS1] >gi|395329786|gb|EJF62171.1| hypothetical protein DICSQDRAFT_169199 [Dichomitus squalens LYAD-421 SS1]	--	--	--	--	--
GL20735-G	36.5767	4.31	-3.08516	Down	0.86345	gi|636608229|ref|XP_008035249.1|	reductase [Trametes versicolor FP-101664 SS1] >gi|392568014|gb|EIW61188.1| Aldo/keto reductase [Trametes versicolor FP-101664 SS1]	aor:AOR_1_2094	AO090120000002; aryl-alcohol dehydrogenase; K17647 versiconal hemiacetal acetate reductase [EC:1.1.1.353]	--	--	--	gi|636608229|ref|XP_008035249.1|	reductase [Trametes versicolor FP-101664 SS1] >gi|392568014|gb|EIW61188.1| Aldo/keto reductase [Trametes versicolor FP-101664 SS1]	aor:AOR_1_2094	AO090120000002; aryl-alcohol dehydrogenase; K17647 versiconal hemiacetal acetate reductase [EC:1.1.1.353]	--	--	--
GL20742-G	5.04333	50.8367	3.33342	Up	0.903978	gi|597979295|ref|XP_007362959.1|	phosphomannomutase [Dichomitus squalens LYAD-421 SS1] >gi|395331768|gb|EJF64148.1| eukaryotic phosphomannomutase [Dichomitus squalens LYAD-421 SS1]	dsq:DICSQDRAFT_133831	eukaryotic phosphomannomutase; K17497 phosphomannomutase [EC:5.4.2.8]	GO:0009298 GDP-mannose biosynthetic process	GO:0004615 phosphomannomutase activity	GO:0005737 cytoplasm	gi|597979295|ref|XP_007362959.1|	phosphomannomutase [Dichomitus squalens LYAD-421 SS1] >gi|395331768|gb|EJF64148.1| eukaryotic phosphomannomutase [Dichomitus squalens LYAD-421 SS1]	dsq:DICSQDRAFT_133831	eukaryotic phosphomannomutase; K17497 phosphomannomutase [EC:5.4.2.8]	GO:0009298 GDP-mannose biosynthetic process	GO:0004615 phosphomannomutase activity	GO:0005737 cytoplasm
GL20749-G	19.09	94.0533	2.30066	Up	0.886149	gi|597985927|ref|XP_007364662.1|	protein DICSQDRAFT_135558 [Dichomitus squalens LYAD-421 SS1] >gi|395330205|gb|EJF62589.1| hypothetical protein DICSQDRAFT_135558 [Dichomitus squalens LYAD-421 SS1]	--	--	--	--	--	gi|597985927|ref|XP_007364662.1|	protein DICSQDRAFT_135558 [Dichomitus squalens LYAD-421 SS1] >gi|395330205|gb|EJF62589.1| hypothetical protein DICSQDRAFT_135558 [Dichomitus squalens LYAD-421 SS1]	--	--	--	--	--
GL20753-G	66.88	248.597	1.89416	Up	0.862781	gi|598010435|ref|XP_007371022.1|	protein DICSQDRAFT_93860 [Dichomitus squalens LYAD-421 SS1] >gi|395323776|gb|EJF56233.1| hypothetical protein DICSQDRAFT_93860 [Dichomitus squalens LYAD-421 SS1]	--	--	--	--	--	gi|598010435|ref|XP_007371022.1|	protein DICSQDRAFT_93860 [Dichomitus squalens LYAD-421 SS1] >gi|395323776|gb|EJF56233.1| hypothetical protein DICSQDRAFT_93860 [Dichomitus squalens LYAD-421 SS1]	--	--	--	--	--
GL20759-G	10.1633	43.78	2.1069	Up	0.814061	gi|598003793|ref|XP_007369321.1|	protein DICSQDRAFT_173441 [Dichomitus squalens LYAD-421 SS1] >gi|395325525|gb|EJF57946.1| hypothetical protein DICSQDRAFT_173441 [Dichomitus squalens LYAD-421 SS1]	pco:PHACADRAFT_252148	hypothetical protein; K05760 paxillin	--	GO:0046872 metal ion binding	--	gi|598003793|ref|XP_007369321.1|	protein DICSQDRAFT_173441 [Dichomitus squalens LYAD-421 SS1] >gi|395325525|gb|EJF57946.1| hypothetical protein DICSQDRAFT_173441 [Dichomitus squalens LYAD-421 SS1]	pco:PHACADRAFT_252148	hypothetical protein; K05760 paxillin	--	GO:0046872 metal ion binding	--
GL20761-G	49.0433	159.26	1.69926	Up	0.822686	gi|598003833|ref|XP_007369331.1|	protein DICSQDRAFT_91511 [Dichomitus squalens LYAD-421 SS1] >gi|395325535|gb|EJF57956.1| hypothetical protein DICSQDRAFT_91511 [Dichomitus squalens LYAD-421 SS1]	dsq:DICSQDRAFT_91511	hypothetical protein; K12881 THO complex subunit 4	--	GO:0003676 nucleic acid binding | GO:0000166 nucleotide binding	--	gi|598003833|ref|XP_007369331.1|	protein DICSQDRAFT_91511 [Dichomitus squalens LYAD-421 SS1] >gi|395325535|gb|EJF57956.1| hypothetical protein DICSQDRAFT_91511 [Dichomitus squalens LYAD-421 SS1]	dsq:DICSQDRAFT_91511	hypothetical protein; K12881 THO complex subunit 4	--	GO:0003676 nucleic acid binding | GO:0000166 nucleotide binding	--
GL20774-G	23.4667	185.587	2.98341	Up	0.949074	gi|598004317|ref|XP_007369458.1|	protein [Dichomitus squalens LYAD-421 SS1] >gi|395325407|gb|EJF57830.1| HCP-like protein [Dichomitus squalens LYAD-421 SS1]	lth:KLTH0C06820g	KLTH0C06820p; K07126 uncharacterized protein	--	--	--	gi|598004317|ref|XP_007369458.1|	protein [Dichomitus squalens LYAD-421 SS1] >gi|395325407|gb|EJF57830.1| HCP-like protein [Dichomitus squalens LYAD-421 SS1]	lth:KLTH0C06820g	KLTH0C06820p; K07126 uncharacterized protein	--	--	--
GL20806-G	15.9067	75.8167	2.25288	Up	0.871249	gi|564733367|gb|AHC00606.1|	protein kinase [Ganoderma lucidum]	cnb:CNBH0400	hypothetical protein; K04464 mitogen-activated protein kinase 7 [EC:2.7.11.24]	GO:0006468 protein phosphorylation	GO:0004672 protein kinase activity | GO:0005524 ATP binding	--	gi|564733367|gb|AHC00606.1|	protein kinase [Ganoderma lucidum]	cnb:CNBH0400	hypothetical protein; K04464 mitogen-activated protein kinase 7 [EC:2.7.11.24]	GO:0006468 protein phosphorylation	GO:0004672 protein kinase activity | GO:0005524 ATP binding	--
GL20809-G	20.0833	78.9533	1.975	Up	0.84167	gi|597985981|ref|XP_007364677.1|	protein DICSQDRAFT_104056 [Dichomitus squalens LYAD-421 SS1] >gi|395330220|gb|EJF62604.1| hypothetical protein DICSQDRAFT_104056 [Dichomitus squalens LYAD-421 SS1]	dsq:DICSQDRAFT_104056	hypothetical protein; K15196 transcription factor IIIB 90 kDa subunit	--	--	--	gi|597985981|ref|XP_007364677.1|	protein DICSQDRAFT_104056 [Dichomitus squalens LYAD-421 SS1] >gi|395330220|gb|EJF62604.1| hypothetical protein DICSQDRAFT_104056 [Dichomitus squalens LYAD-421 SS1]	dsq:DICSQDRAFT_104056	hypothetical protein; K15196 transcription factor IIIB 90 kDa subunit	--	--	--
GL20818-G	5.67667	36.09	2.66848	Up	0.841526	gi|597986053|ref|XP_007364695.1|	protein DICSQDRAFT_57584 [Dichomitus squalens LYAD-421 SS1] >gi|395330238|gb|EJF62622.1| hypothetical protein DICSQDRAFT_57584 [Dichomitus squalens LYAD-421 SS1]	dsq:DICSQDRAFT_57584	hypothetical protein; K17824 DCN1-like protein 4/5	--	--	--	gi|597986053|ref|XP_007364695.1|	protein DICSQDRAFT_57584 [Dichomitus squalens LYAD-421 SS1] >gi|395330238|gb|EJF62622.1| hypothetical protein DICSQDRAFT_57584 [Dichomitus squalens LYAD-421 SS1]	dsq:DICSQDRAFT_57584	hypothetical protein; K17824 DCN1-like protein 4/5	--	--	--
GL20820-G	3.65	30.6967	3.07211	Up	0.842563	gi|597986059|ref|XP_007364697.1|	[Dichomitus squalens LYAD-421 SS1] >gi|395330240|gb|EJF62624.1| RabGAP/TBC [Dichomitus squalens LYAD-421 SS1]	dsq:DICSQDRAFT_57958	RabGAP/TBC; K18469 TBC1 domain family member 5	--	--	--	gi|597986059|ref|XP_007364697.1|	[Dichomitus squalens LYAD-421 SS1] >gi|395330240|gb|EJF62624.1| RabGAP/TBC [Dichomitus squalens LYAD-421 SS1]	dsq:DICSQDRAFT_57958	RabGAP/TBC; K18469 TBC1 domain family member 5	--	--	--
GL20823-G	13.7967	68.9133	2.32046	Up	0.872207	gi|597986119|ref|XP_007364713.1|	protein DICSQDRAFT_154474 [Dichomitus squalens LYAD-421 SS1] >gi|395330256|gb|EJF62640.1| hypothetical protein DICSQDRAFT_154474 [Dichomitus squalens LYAD-421 SS1]	abe:ARB_05732	hypothetical protein; K04487 cysteine desulfurase [EC:2.8.1.7]	--	--	--	gi|597986119|ref|XP_007364713.1|	protein DICSQDRAFT_154474 [Dichomitus squalens LYAD-421 SS1] >gi|395330256|gb|EJF62640.1| hypothetical protein DICSQDRAFT_154474 [Dichomitus squalens LYAD-421 SS1]	abe:ARB_05732	hypothetical protein; K04487 cysteine desulfurase [EC:2.8.1.7]	--	--	--
GL20836-G	46.96	194.047	2.0469	Up	0.882355	gi|598012245|ref|XP_007371456.1|	protein DICSQDRAFT_184174 [Dichomitus squalens LYAD-421 SS1] >gi|395323330|gb|EJF55806.1| hypothetical protein DICSQDRAFT_184174 [Dichomitus squalens LYAD-421 SS1]	--	--	GO:0006810 transport	GO:0003676 nucleic acid binding | GO:0000166 nucleotide binding	GO:0005622 intracellular	gi|598012245|ref|XP_007371456.1|	protein DICSQDRAFT_184174 [Dichomitus squalens LYAD-421 SS1] >gi|395323330|gb|EJF55806.1| hypothetical protein DICSQDRAFT_184174 [Dichomitus squalens LYAD-421 SS1]	--	--	GO:0006810 transport	GO:0003676 nucleic acid binding | GO:0000166 nucleotide binding	GO:0005622 intracellular
GL20838-G	6.79667	41.4533	2.60859	Up	0.852816	gi|597988405|ref|XP_007365298.1|	protein [Dichomitus squalens LYAD-421 SS1] >gi|395329657|gb|EJF62043.1| Piwi-domain-containing protein [Dichomitus squalens LYAD-421 SS1]	abp:AGABI1DRAFT123543	AGABI1DRAFT_123543; hypothetical protein; K11593 eukaryotic translation initiation factor 2C	--	GO:0003676 nucleic acid binding	--	gi|597988405|ref|XP_007365298.1|	protein [Dichomitus squalens LYAD-421 SS1] >gi|395329657|gb|EJF62043.1| Piwi-domain-containing protein [Dichomitus squalens LYAD-421 SS1]	abp:AGABI1DRAFT123543	AGABI1DRAFT_123543; hypothetical protein; K11593 eukaryotic translation initiation factor 2C	--	GO:0003676 nucleic acid binding	--
GL20846-G	6.6	36.4433	2.46512	Up	0.828725	gi|598010415|ref|XP_007371017.1|	protein DICSQDRAFT_113304 [Dichomitus squalens LYAD-421 SS1] >gi|395323771|gb|EJF56228.1| hypothetical protein DICSQDRAFT_113304 [Dichomitus squalens LYAD-421 SS1]	--	--	--	--	GO:0016021 integral component of membrane	gi|598010415|ref|XP_007371017.1|	protein DICSQDRAFT_113304 [Dichomitus squalens LYAD-421 SS1] >gi|395323771|gb|EJF56228.1| hypothetical protein DICSQDRAFT_113304 [Dichomitus squalens LYAD-421 SS1]	--	--	--	--	GO:0016021 integral component of membrane
GL20856-G	27.32	161.237	2.56115	Up	0.925522	gi|598003705|ref|XP_007369299.1|	transferase delta subunit [Dichomitus squalens LYAD-421 SS1] >gi|395325503|gb|EJF57924.1| oligosaccharyl transferase delta subunit [Dichomitus squalens LYAD-421 SS1]	dsq:DICSQDRAFT_163156	oligosaccharyl transferase delta subunit; K12667 oligosaccharyltransferase complex subunit delta (ribophorin II)	GO:0006487 protein N-linked glycosylation	GO:0016740 transferase activity	GO:0008250 oligosaccharyltransferase complex | GO:0016021 integral component of membrane	gi|598003705|ref|XP_007369299.1|	transferase delta subunit [Dichomitus squalens LYAD-421 SS1] >gi|395325503|gb|EJF57924.1| oligosaccharyl transferase delta subunit [Dichomitus squalens LYAD-421 SS1]	dsq:DICSQDRAFT_163156	oligosaccharyl transferase delta subunit; K12667 oligosaccharyltransferase complex subunit delta (ribophorin II)	GO:0006487 protein N-linked glycosylation	GO:0016740 transferase activity	GO:0008250 oligosaccharyltransferase complex | GO:0016021 integral component of membrane
GL20857-G	71.27	621.68	3.12481	Up	0.966732	gi|598003721|ref|XP_007369303.1|	protein DICSQDRAFT_139873 [Dichomitus squalens LYAD-421 SS1] >gi|395325507|gb|EJF57928.1| hypothetical protein DICSQDRAFT_139873 [Dichomitus squalens LYAD-421 SS1]	--	--	--	--	GO:0016020 membrane	gi|598003721|ref|XP_007369303.1|	protein DICSQDRAFT_139873 [Dichomitus squalens LYAD-421 SS1] >gi|395325507|gb|EJF57928.1| hypothetical protein DICSQDRAFT_139873 [Dichomitus squalens LYAD-421 SS1]	--	--	--	--	GO:0016020 membrane
GL20858-G	2.67667	122.537	5.51663	Up	0.971472	gi|598003801|ref|XP_007369323.1|	P450 [Dichomitus squalens LYAD-421 SS1] >gi|395325527|gb|EJF57948.1| cytochrome P450 [Dichomitus squalens LYAD-421 SS1]	scm:SCHCODRAFT_86054	hypothetical protein; K07824 benzoate 4-monooxygenase [EC:1.14.13.12]	GO:0055114 oxidation-reduction process	GO:0020037 heme binding | GO:0016705 oxidoreductase activity, acting on paired donors, with incorporation or reduction of molecular oxygen | GO:0005506 iron ion binding	GO:0016021 integral component of membrane	gi|598003801|ref|XP_007369323.1|	P450 [Dichomitus squalens LYAD-421 SS1] >gi|395325527|gb|EJF57948.1| cytochrome P450 [Dichomitus squalens LYAD-421 SS1]	scm:SCHCODRAFT_86054	hypothetical protein; K07824 benzoate 4-monooxygenase [EC:1.14.13.12]	GO:0055114 oxidation-reduction process	GO:0020037 heme binding | GO:0016705 oxidoreductase activity, acting on paired donors, with incorporation or reduction of molecular oxygen | GO:0005506 iron ion binding	GO:0016021 integral component of membrane
GL20868-G	8.56	70.1433	3.03462	Up	0.916371	gi|598011911|ref|XP_007371378.1|	P450 [Dichomitus squalens LYAD-421 SS1] >gi|395323425|gb|EJF55897.1| cytochrome P450 [Dichomitus squalens LYAD-421 SS1]	bze:COCCADRAFT_104303	hypothetical protein; K07824 benzoate 4-monooxygenase [EC:1.14.13.12]	GO:0055114 oxidation-reduction process	GO:0020037 heme binding | GO:0016705 oxidoreductase activity, acting on paired donors, with incorporation or reduction of molecular oxygen | GO:0004497 monooxygenase activity | GO:0005506 iron ion binding	--	gi|598011911|ref|XP_007371378.1|	P450 [Dichomitus squalens LYAD-421 SS1] >gi|395323425|gb|EJF55897.1| cytochrome P450 [Dichomitus squalens LYAD-421 SS1]	bze:COCCADRAFT_104303	hypothetical protein; K07824 benzoate 4-monooxygenase [EC:1.14.13.12]	GO:0055114 oxidation-reduction process	GO:0020037 heme binding | GO:0016705 oxidoreductase activity, acting on paired donors, with incorporation or reduction of molecular oxygen | GO:0004497 monooxygenase activity | GO:0005506 iron ion binding	--
GL20880-G	27.1	131.523	2.27895	Up	0.897597	gi|598004213|ref|XP_007369431.1|	C-terminal domain-like protein [Dichomitus squalens LYAD-421 SS1] >gi|395325380|gb|EJF57803.1| enolase C-terminal domain-like protein [Dichomitus squalens LYAD-421 SS1]	dsq:DICSQDRAFT_182952	enolase C-terminal domain-like protein; K18334 L-fuconate dehydratase [EC:4.2.1.68]	GO:0009063 cellular amino acid catabolic process	GO:0003824 catalytic activity	--	gi|598004213|ref|XP_007369431.1|	C-terminal domain-like protein [Dichomitus squalens LYAD-421 SS1] >gi|395325380|gb|EJF57803.1| enolase C-terminal domain-like protein [Dichomitus squalens LYAD-421 SS1]	dsq:DICSQDRAFT_182952	enolase C-terminal domain-like protein; K18334 L-fuconate dehydratase [EC:4.2.1.68]	GO:0009063 cellular amino acid catabolic process	GO:0003824 catalytic activity	--
GL20901-G	10.9533	61.6267	2.49218	Up	0.878062	gi|691788193|emb|CDO75539.1|	protein BN946_scf184776.g5 [Trametes cinnabarina]	dsq:DICSQDRAFT_113101	hypothetical protein; K08852 serine/threonine-protein kinase/endoribonuclease IRE1 [EC:2.7.11.1 3.1.26.-]	GO:0044260 cellular macromolecule metabolic process | GO:0044238 primary metabolic process	--	--	gi|691788193|emb|CDO75539.1|	protein BN946_scf184776.g5 [Trametes cinnabarina]	dsq:DICSQDRAFT_113101	hypothetical protein; K08852 serine/threonine-protein kinase/endoribonuclease IRE1 [EC:2.7.11.1 3.1.26.-]	GO:0044260 cellular macromolecule metabolic process | GO:0044238 primary metabolic process	--	--
GL20909-G	15.4233	81.3667	2.39932	Up	0.888224	gi|597997249|ref|XP_007367591.1|	protein DICSQDRAFT_181815 [Dichomitus squalens LYAD-421 SS1] >gi|395327252|gb|EJF59653.1| hypothetical protein DICSQDRAFT_181815 [Dichomitus squalens LYAD-421 SS1]	dsq:DICSQDRAFT_163516	hypothetical protein; K17757 ATP-dependent NAD(P)H-hydrate dehydratase [EC:4.2.1.93]	--	--	--	gi|597997249|ref|XP_007367591.1|	protein DICSQDRAFT_181815 [Dichomitus squalens LYAD-421 SS1] >gi|395327252|gb|EJF59653.1| hypothetical protein DICSQDRAFT_181815 [Dichomitus squalens LYAD-421 SS1]	dsq:DICSQDRAFT_163516	hypothetical protein; K17757 ATP-dependent NAD(P)H-hydrate dehydratase [EC:4.2.1.93]	--	--	--
GL20915-G	3088.39	1067.98	-1.53197	Down	0.809229	gi|636625529|ref|XP_008043899.1|	protein [Trametes versicolor FP-101664 SS1] >gi|392560487|gb|EIW53670.1| DUF775-domain-containing protein [Trametes versicolor FP-101664 SS1]	--	--	--	--	--	gi|636625529|ref|XP_008043899.1|	protein [Trametes versicolor FP-101664 SS1] >gi|392560487|gb|EIW53670.1| DUF775-domain-containing protein [Trametes versicolor FP-101664 SS1]	--	--	--	--	--
GL20916-G	74.4433	230.74	1.63205	Up	0.816778	--	--	--	--	--	--	--	--	--	--	--	--	--	--
GL20955-G	40.4067	148.17	1.87459	Up	0.850007	gi|597989137|ref|XP_007365486.1|	protein DICSQDRAFT_85879 [Dichomitus squalens LYAD-421 SS1] >gi|395329398|gb|EJF61785.1| hypothetical protein DICSQDRAFT_85879 [Dichomitus squalens LYAD-421 SS1]	dsq:DICSQDRAFT_85879	hypothetical protein; K13280 signal peptidase, endoplasmic reticulum-type [EC:3.4.-.-]	GO:0006465 signal peptide processing	GO:0008236 serine-type peptidase activity	GO:0005789 endoplasmic reticulum membrane | GO:0016021 integral component of membrane	gi|597989137|ref|XP_007365486.1|	protein DICSQDRAFT_85879 [Dichomitus squalens LYAD-421 SS1] >gi|395329398|gb|EJF61785.1| hypothetical protein DICSQDRAFT_85879 [Dichomitus squalens LYAD-421 SS1]	dsq:DICSQDRAFT_85879	hypothetical protein; K13280 signal peptidase, endoplasmic reticulum-type [EC:3.4.-.-]	GO:0006465 signal peptide processing	GO:0008236 serine-type peptidase activity	GO:0005789 endoplasmic reticulum membrane | GO:0016021 integral component of membrane
GL20959-G	54.7967	2.96333	-4.2088	Down	0.925312	gi|597989049|ref|XP_007365463.1|	mutase-like protein [Dichomitus squalens LYAD-421 SS1] >gi|395329375|gb|EJF61762.1| phosphoglycerate mutase-like protein [Dichomitus squalens LYAD-421 SS1]	aor:AOR_1_2352154	AO090003001336; histidine acid phosphatase; K01078 acid phosphatase [EC:3.1.3.2]	--	--	--	gi|597989049|ref|XP_007365463.1|	mutase-like protein [Dichomitus squalens LYAD-421 SS1] >gi|395329375|gb|EJF61762.1| phosphoglycerate mutase-like protein [Dichomitus squalens LYAD-421 SS1]	aor:AOR_1_2352154	AO090003001336; histidine acid phosphatase; K01078 acid phosphatase [EC:3.1.3.2]	--	--	--
GL20960-G	105.633	22.4333	-2.23535	Down	0.886149	gi|807752951|ref|XP_012181270.1|	protein [Fibroporia radiculosa] >gi|403415287|emb|CCM01987.1| predicted protein [Fibroporia radiculosa]	dsq:DICSQDRAFT_85835	60S ribosomal protein L31; K02910 large subunit ribosomal protein L31e	GO:0006412 translation	GO:0003735 structural constituent of ribosome	GO:0005840 ribosome | GO:0016021 integral component of membrane	gi|807752951|ref|XP_012181270.1|	protein [Fibroporia radiculosa] >gi|403415287|emb|CCM01987.1| predicted protein [Fibroporia radiculosa]	dsq:DICSQDRAFT_85835	60S ribosomal protein L31; K02910 large subunit ribosomal protein L31e	GO:0006412 translation	GO:0003735 structural constituent of ribosome	GO:0005840 ribosome | GO:0016021 integral component of membrane
GL20961-G	10.4933	44.5833	2.08703	Up	0.813785	gi|597988979|ref|XP_007365444.1|	protein DICSQDRAFT_161376 [Dichomitus squalens LYAD-421 SS1] >gi|395329356|gb|EJF61743.1| hypothetical protein DICSQDRAFT_161376 [Dichomitus squalens LYAD-421 SS1]	cgi:CGB_D2310W	CAP1-related protein; K11702 beta-1,2-xylosyltransferase [EC:2.4.2.-]	GO:0008152 metabolic process	GO:0016740 transferase activity	GO:0016021 integral component of membrane	gi|597988979|ref|XP_007365444.1|	protein DICSQDRAFT_161376 [Dichomitus squalens LYAD-421 SS1] >gi|395329356|gb|EJF61743.1| hypothetical protein DICSQDRAFT_161376 [Dichomitus squalens LYAD-421 SS1]	cgi:CGB_D2310W	CAP1-related protein; K11702 beta-1,2-xylosyltransferase [EC:2.4.2.-]	GO:0008152 metabolic process	GO:0016740 transferase activity	GO:0016021 integral component of membrane
GL20974-G	56.1767	193.27	1.78257	Up	0.840895	gi|691796775|emb|CDO68646.1|	protein BN946_scf184382.g3 [Trametes cinnabarina]	--	--	--	--	--	gi|691796775|emb|CDO68646.1|	protein BN946_scf184382.g3 [Trametes cinnabarina]	--	--	--	--	--
GL20975-G	95.7367	295.81	1.62753	Up	0.820074	gi|597997387|ref|XP_007367625.1|	protein DICSQDRAFT_171863 [Dichomitus squalens LYAD-421 SS1] >gi|395327286|gb|EJF59687.1| hypothetical protein DICSQDRAFT_171863 [Dichomitus squalens LYAD-421 SS1]	--	--	--	--	--	gi|597997387|ref|XP_007367625.1|	protein DICSQDRAFT_171863 [Dichomitus squalens LYAD-421 SS1] >gi|395327286|gb|EJF59687.1| hypothetical protein DICSQDRAFT_171863 [Dichomitus squalens LYAD-421 SS1]	--	--	--	--	--
GL20988-G	56.2467	285.797	2.34515	Up	0.919036	gi|598009401|ref|XP_007370772.1|	protein [Dichomitus squalens LYAD-421 SS1] >gi|395324017|gb|EJF56466.1| chloroperoxidase-like protein [Dichomitus squalens LYAD-421 SS1]	--	--	GO:0098869 cellular oxidant detoxification	GO:0004601 peroxidase activity	GO:0016021 integral component of membrane	gi|598009401|ref|XP_007370772.1|	protein [Dichomitus squalens LYAD-421 SS1] >gi|395324017|gb|EJF56466.1| chloroperoxidase-like protein [Dichomitus squalens LYAD-421 SS1]	--	--	GO:0098869 cellular oxidant detoxification	GO:0004601 peroxidase activity	GO:0016021 integral component of membrane
GL21008-G	2324.67	567.85	-2.03344	Down	0.897269	gi|646397907|gb|KDQ62058.1|	protein JAAARDRAFT_29959 [Jaapia argillacea MUCL 33604]	mrr:Moror_439	26s proteasome non-atpase regulatory subunit 12; K03035 26S proteasome regulatory subunit N5	--	--	--	gi|646397907|gb|KDQ62058.1|	protein JAAARDRAFT_29959 [Jaapia argillacea MUCL 33604]	mrr:Moror_439	26s proteasome non-atpase regulatory subunit 12; K03035 26S proteasome regulatory subunit N5	--	--	--
GL21012-G	15.4567	58.73	1.92587	Up	0.814061	gi|597989081|ref|XP_007365472.1|	protein DICSQDRAFT_59745 [Dichomitus squalens LYAD-421 SS1] >gi|395329384|gb|EJF61771.1| hypothetical protein DICSQDRAFT_59745 [Dichomitus squalens LYAD-421 SS1]	--	--	GO:0006355 regulation of transcription, DNA-templated	GO:0043565 sequence-specific DNA binding | GO:0003700 transcription factor activity, sequence-specific DNA binding	--	gi|597989081|ref|XP_007365472.1|	protein DICSQDRAFT_59745 [Dichomitus squalens LYAD-421 SS1] >gi|395329384|gb|EJF61771.1| hypothetical protein DICSQDRAFT_59745 [Dichomitus squalens LYAD-421 SS1]	--	--	GO:0006355 regulation of transcription, DNA-templated	GO:0043565 sequence-specific DNA binding | GO:0003700 transcription factor activity, sequence-specific DNA binding	--
GL21021-G	26.5167	111.923	2.07754	Up	0.871616	gi|597997395|ref|XP_007367627.1|	general substrate transporter [Dichomitus squalens LYAD-421 SS1] >gi|395327288|gb|EJF59689.1| MFS general substrate transporter [Dichomitus squalens LYAD-421 SS1]	--	--	GO:0055085 transmembrane transport	--	GO:0016021 integral component of membrane	gi|597997395|ref|XP_007367627.1|	general substrate transporter [Dichomitus squalens LYAD-421 SS1] >gi|395327288|gb|EJF59689.1| MFS general substrate transporter [Dichomitus squalens LYAD-421 SS1]	--	--	GO:0055085 transmembrane transport	--	GO:0016021 integral component of membrane
GL21029-G	12.26	51.4633	2.06959	Up	0.824038	gi|597997383|ref|XP_007367624.1|	protein DICSQDRAFT_148397 [Dichomitus squalens LYAD-421 SS1] >gi|395327285|gb|EJF59686.1| hypothetical protein DICSQDRAFT_148397 [Dichomitus squalens LYAD-421 SS1]	--	--	--	--	GO:0016021 integral component of membrane	gi|597997383|ref|XP_007367624.1|	protein DICSQDRAFT_148397 [Dichomitus squalens LYAD-421 SS1] >gi|395327285|gb|EJF59686.1| hypothetical protein DICSQDRAFT_148397 [Dichomitus squalens LYAD-421 SS1]	--	--	--	--	GO:0016021 integral component of membrane
GL21046-G	29.26	137.937	2.237	Up	0.895471	gi|597997313|ref|XP_007367607.1|	protein DICSQDRAFT_138398 [Dichomitus squalens LYAD-421 SS1] >gi|395327268|gb|EJF59669.1| hypothetical protein DICSQDRAFT_138398 [Dichomitus squalens LYAD-421 SS1]	--	--	--	--	GO:0016021 integral component of membrane	gi|597997313|ref|XP_007367607.1|	protein DICSQDRAFT_138398 [Dichomitus squalens LYAD-421 SS1] >gi|395327268|gb|EJF59669.1| hypothetical protein DICSQDRAFT_138398 [Dichomitus squalens LYAD-421 SS1]	--	--	--	--	GO:0016021 integral component of membrane
GL21056-G	7.46333	298.123	5.31995	Up	0.985939	gi|598011571|ref|XP_007371298.1|	P450 [Dichomitus squalens LYAD-421 SS1] >gi|395323480|gb|EJF55949.1| cytochrome P450 [Dichomitus squalens LYAD-421 SS1]	fpu:FPSE_06068	hypothetical protein; K21295 multifunctional cytochrome P450 monooxygenase	GO:0055114 oxidation-reduction process	GO:0020037 heme binding | GO:0016705 oxidoreductase activity, acting on paired donors, with incorporation or reduction of molecular oxygen | GO:0004497 monooxygenase activity | GO:0005506 iron ion binding	GO:0016021 integral component of membrane	gi|598011571|ref|XP_007371298.1|	P450 [Dichomitus squalens LYAD-421 SS1] >gi|395323480|gb|EJF55949.1| cytochrome P450 [Dichomitus squalens LYAD-421 SS1]	fpu:FPSE_06068	hypothetical protein; K21295 multifunctional cytochrome P450 monooxygenase	GO:0055114 oxidation-reduction process	GO:0020037 heme binding | GO:0016705 oxidoreductase activity, acting on paired donors, with incorporation or reduction of molecular oxygen | GO:0004497 monooxygenase activity | GO:0005506 iron ion binding	GO:0016021 integral component of membrane
GL21078-G	188.917	56.16	-1.75014	Down	0.835605	gi|597988497|ref|XP_007365321.1|	domain-containing protein [Dichomitus squalens LYAD-421 SS1] >gi|395329680|gb|EJF62066.1| FAD/NAD(P)-binding domain-containing protein [Dichomitus squalens LYAD-421 SS1]	maj:MAA_04517	dimethylaniline monooxygenase (N-oxide forming); K00485 dimethylaniline monooxygenase (N-oxide forming) [EC:1.14.13.8]	--	--	--	gi|597988497|ref|XP_007365321.1|	domain-containing protein [Dichomitus squalens LYAD-421 SS1] >gi|395329680|gb|EJF62066.1| FAD/NAD(P)-binding domain-containing protein [Dichomitus squalens LYAD-421 SS1]	maj:MAA_04517	dimethylaniline monooxygenase (N-oxide forming); K00485 dimethylaniline monooxygenase (N-oxide forming) [EC:1.14.13.8]	--	--	--
GL21092-G	32.72	517.883	3.98438	Up	0.983301	gi|564733389|gb|AHC00617.1|	[Ganoderma lucidum]	cnb:CNBB4490	hypothetical protein; K01802 peptidylprolyl isomerase [EC:5.2.1.8]	GO:0006457 protein folding | GO:0000413 protein peptidyl-prolyl isomerization	GO:0003755 peptidyl-prolyl cis-trans isomerase activity	--	gi|564733389|gb|AHC00617.1|	[Ganoderma lucidum]	cnb:CNBB4490	hypothetical protein; K01802 peptidylprolyl isomerase [EC:5.2.1.8]	GO:0006457 protein folding | GO:0000413 protein peptidyl-prolyl isomerization	GO:0003755 peptidyl-prolyl cis-trans isomerase activity	--
GL21106-G	114.137	36.37	-1.64994	Down	0.803256	gi|597999921|ref|XP_007368290.1|	[Dichomitus squalens LYAD-421 SS1] >gi|395326579|gb|EJF58987.1| metalloprotease [Dichomitus squalens LYAD-421 SS1]	dsq:DICSQDRAFT_109441	metalloprotease; K08646 peptidyl-Lys metalloendopeptidase [EC:3.4.24.20]	GO:0006508 proteolysis	GO:0004222 metalloendopeptidase activity	--	gi|597999921|ref|XP_007368290.1|	[Dichomitus squalens LYAD-421 SS1] >gi|395326579|gb|EJF58987.1| metalloprotease [Dichomitus squalens LYAD-421 SS1]	dsq:DICSQDRAFT_109441	metalloprotease; K08646 peptidyl-Lys metalloendopeptidase [EC:3.4.24.20]	GO:0006508 proteolysis	GO:0004222 metalloendopeptidase activity	--
GL21107-G	28.5833	142.047	2.31312	Up	0.902153	gi|242206257|ref|XP_002468985.1|	protein [Postia placenta Mad-698-R] >gi|220732079|gb|EED85918.1| predicted protein [Postia placenta Mad-698-R]	ppl:POSPLDRAFT_100227	hypothetical protein; K12843 U4/U6 small nuclear ribonucleoprotein PRP3	GO:0000398 mRNA splicing, via spliceosome	--	GO:0046540 U4/U6 x U5 tri-snRNP complex	gi|242206257|ref|XP_002468985.1|	protein [Postia placenta Mad-698-R] >gi|220732079|gb|EED85918.1| predicted protein [Postia placenta Mad-698-R]	ppl:POSPLDRAFT_100227	hypothetical protein; K12843 U4/U6 small nuclear ribonucleoprotein PRP3	GO:0000398 mRNA splicing, via spliceosome	--	GO:0046540 U4/U6 x U5 tri-snRNP complex
GL21125-G	67.9433	285.92	2.07321	Up	0.891125	gi|597989811|ref|XP_007365666.1|	protein DICSQDRAFT_86124 [Dichomitus squalens LYAD-421 SS1] >gi|395329183|gb|EJF61571.1| hypothetical protein DICSQDRAFT_86124 [Dichomitus squalens LYAD-421 SS1]	dsq:DICSQDRAFT_86124	hypothetical protein; K14022 coupling of ubiquitin conjugation to ER degradation protein 1	--	--	--	gi|597989811|ref|XP_007365666.1|	protein DICSQDRAFT_86124 [Dichomitus squalens LYAD-421 SS1] >gi|395329183|gb|EJF61571.1| hypothetical protein DICSQDRAFT_86124 [Dichomitus squalens LYAD-421 SS1]	dsq:DICSQDRAFT_86124	hypothetical protein; K14022 coupling of ubiquitin conjugation to ER degradation protein 1	--	--	--
GL21127-G	277.2	830.89	1.58373	Up	0.818459	gi|597989879|ref|XP_007365684.1|	iron reductase [Dichomitus squalens LYAD-421 SS1] >gi|395329201|gb|EJF61589.1| incomplete iron reductase [Dichomitus squalens LYAD-421 SS1]	cne:CNA02040	ferric reductase transmembrane component; K00521 ferric-chelate reductase [EC:1.16.1.7]	GO:0055114 oxidation-reduction process	GO:0016491 oxidoreductase activity	GO:0016021 integral component of membrane	gi|597989879|ref|XP_007365684.1|	iron reductase [Dichomitus squalens LYAD-421 SS1] >gi|395329201|gb|EJF61589.1| incomplete iron reductase [Dichomitus squalens LYAD-421 SS1]	cne:CNA02040	ferric reductase transmembrane component; K00521 ferric-chelate reductase [EC:1.16.1.7]	GO:0055114 oxidation-reduction process	GO:0016491 oxidoreductase activity	GO:0016021 integral component of membrane
GL21130-G	7.98	56.9933	2.83633	Up	0.894118	gi|597993769|ref|XP_007366701.1|	reductase [Dichomitus squalens LYAD-421 SS1] >gi|395328168|gb|EJF60562.1| Aldo/keto reductase [Dichomitus squalens LYAD-421 SS1]	aor:AOR_1_2094	AO090120000002; aryl-alcohol dehydrogenase; K17647 versiconal hemiacetal acetate reductase [EC:1.1.1.353]	--	--	--	gi|597993769|ref|XP_007366701.1|	reductase [Dichomitus squalens LYAD-421 SS1] >gi|395328168|gb|EJF60562.1| Aldo/keto reductase [Dichomitus squalens LYAD-421 SS1]	aor:AOR_1_2094	AO090120000002; aryl-alcohol dehydrogenase; K17647 versiconal hemiacetal acetate reductase [EC:1.1.1.353]	--	--	--
GL21139-G	83.7267	5.21333	-4.00541	Down	0.94805	gi|597989551|ref|XP_007365597.1|	protein L38e [Dichomitus squalens LYAD-421 SS1] >gi|395329114|gb|EJF61502.1| ribosomal protein L38e [Dichomitus squalens LYAD-421 SS1]	dsq:DICSQDRAFT_105638	ribosomal protein L38e; K02923 large subunit ribosomal protein L38e	GO:0006412 translation	GO:0003735 structural constituent of ribosome	GO:0005840 ribosome	gi|597989551|ref|XP_007365597.1|	protein L38e [Dichomitus squalens LYAD-421 SS1] >gi|395329114|gb|EJF61502.1| ribosomal protein L38e [Dichomitus squalens LYAD-421 SS1]	dsq:DICSQDRAFT_105638	ribosomal protein L38e; K02923 large subunit ribosomal protein L38e	GO:0006412 translation	GO:0003735 structural constituent of ribosome	GO:0005840 ribosome
GL21142-G	9.30667	67.8867	2.86679	Up	0.907772	gi|597993267|ref|XP_007366573.1|	protein DICSQDRAFT_87573 [Dichomitus squalens LYAD-421 SS1] >gi|395328343|gb|EJF60736.1| hypothetical protein DICSQDRAFT_87573 [Dichomitus squalens LYAD-421 SS1]	npa:UCRNP2_4597	putative cell division control protein; K20121 formin-binding protein 1	--	--	--	gi|597993267|ref|XP_007366573.1|	protein DICSQDRAFT_87573 [Dichomitus squalens LYAD-421 SS1] >gi|395328343|gb|EJF60736.1| hypothetical protein DICSQDRAFT_87573 [Dichomitus squalens LYAD-421 SS1]	npa:UCRNP2_4597	putative cell division control protein; K20121 formin-binding protein 1	--	--	--
GL21144-G	6.52667	34.5933	2.40608	Up	0.817829	gi|636620907|ref|XP_008041588.1|	protein TRAVEDRAFT_171989 [Trametes versicolor FP-101664 SS1] >gi|392562905|gb|EIW56085.1| hypothetical protein TRAVEDRAFT_171989 [Trametes versicolor FP-101664 SS1]	dsq:DICSQDRAFT_65838	hypothetical protein; K07765 S2P endopeptidase [EC:3.4.24.85]	GO:0006508 proteolysis	GO:0004222 metalloendopeptidase activity	GO:0016021 integral component of membrane	gi|636620907|ref|XP_008041588.1|	protein TRAVEDRAFT_171989 [Trametes versicolor FP-101664 SS1] >gi|392562905|gb|EIW56085.1| hypothetical protein TRAVEDRAFT_171989 [Trametes versicolor FP-101664 SS1]	dsq:DICSQDRAFT_65838	hypothetical protein; K07765 S2P endopeptidase [EC:3.4.24.85]	GO:0006508 proteolysis	GO:0004222 metalloendopeptidase activity	GO:0016021 integral component of membrane
GL21156-G	20.2533	83.6467	2.04615	Up	0.854615	gi|598007555|ref|XP_007370272.1|	protein DICSQDRAFT_140748 [Dichomitus squalens LYAD-421 SS1] >gi|395324561|gb|EJF56999.1| hypothetical protein DICSQDRAFT_140748 [Dichomitus squalens LYAD-421 SS1]	dsq:DICSQDRAFT_140748	hypothetical protein; K11667 INO80 complex subunit C	GO:0006355 regulation of transcription, DNA-templated | GO:0006338 chromatin remodeling	--	GO:0031011 Ino80 complex	gi|598007555|ref|XP_007370272.1|	protein DICSQDRAFT_140748 [Dichomitus squalens LYAD-421 SS1] >gi|395324561|gb|EJF56999.1| hypothetical protein DICSQDRAFT_140748 [Dichomitus squalens LYAD-421 SS1]	dsq:DICSQDRAFT_140748	hypothetical protein; K11667 INO80 complex subunit C	GO:0006355 regulation of transcription, DNA-templated | GO:0006338 chromatin remodeling	--	GO:0031011 Ino80 complex
GL21173-G	246.853	720.973	1.54629	Up	0.80986	gi|597990013|ref|XP_007365720.1|	ATPase 1 [Dichomitus squalens LYAD-421 SS1] >gi|395329237|gb|EJF61625.1| phospholipid-transporting ATPase 1 [Dichomitus squalens LYAD-421 SS1]	dsq:DICSQDRAFT_86233	phospholipid-transporting ATPase 1; K01530 phospholipid-translocating ATPase [EC:3.6.3.1]	GO:0045332 phospholipid translocation | GO:0008152 metabolic process	GO:0005524 ATP binding | GO:0000287 magnesium ion binding | GO:0004012 phospholipid-translocating ATPase activity	GO:0016021 integral component of membrane	gi|597990013|ref|XP_007365720.1|	ATPase 1 [Dichomitus squalens LYAD-421 SS1] >gi|395329237|gb|EJF61625.1| phospholipid-transporting ATPase 1 [Dichomitus squalens LYAD-421 SS1]	dsq:DICSQDRAFT_86233	phospholipid-transporting ATPase 1; K01530 phospholipid-translocating ATPase [EC:3.6.3.1]	GO:0045332 phospholipid translocation | GO:0008152 metabolic process	GO:0005524 ATP binding | GO:0000287 magnesium ion binding | GO:0004012 phospholipid-translocating ATPase activity	GO:0016021 integral component of membrane
GL21185-G	83.3467	318.13	1.93242	Up	0.871721	gi|636620989|ref|XP_008041629.1|	protein TRAVEDRAFT_129035, partial [Trametes versicolor FP-101664 SS1] >gi|392562972|gb|EIW56152.1| hypothetical protein TRAVEDRAFT_129035, partial [Trametes versicolor FP-101664 SS1]	--	--	--	--	--	gi|636620989|ref|XP_008041629.1|	protein TRAVEDRAFT_129035, partial [Trametes versicolor FP-101664 SS1] >gi|392562972|gb|EIW56152.1| hypothetical protein TRAVEDRAFT_129035, partial [Trametes versicolor FP-101664 SS1]	--	--	--	--	--
GL21206-G	15.08	60.1733	1.99649	Up	0.826966	gi|597989425|ref|XP_007365562.1|	synthetase [Dichomitus squalens LYAD-421 SS1] >gi|395329474|gb|EJF61861.1| threonyl-tRNA synthetase [Dichomitus squalens LYAD-421 SS1]	dsq:DICSQDRAFT_85991	threonyl-tRNA synthetase; K01868 threonyl-tRNA synthetase [EC:6.1.1.3]	GO:0006435 threonyl-tRNA aminoacylation	GO:0004829 threonine-tRNA ligase activity | GO:0005524 ATP binding	GO:0005737 cytoplasm	gi|597989425|ref|XP_007365562.1|	synthetase [Dichomitus squalens LYAD-421 SS1] >gi|395329474|gb|EJF61861.1| threonyl-tRNA synthetase [Dichomitus squalens LYAD-421 SS1]	dsq:DICSQDRAFT_85991	threonyl-tRNA synthetase; K01868 threonyl-tRNA synthetase [EC:6.1.1.3]	GO:0006435 threonyl-tRNA aminoacylation	GO:0004829 threonine-tRNA ligase activity | GO:0005524 ATP binding	GO:0005737 cytoplasm
GL21211-G	191.523	866.857	2.17827	Up	0.911934	gi|597999897|ref|XP_007368283.1|	protein DICSQDRAFT_138871 [Dichomitus squalens LYAD-421 SS1] >gi|395326572|gb|EJF58980.1| hypothetical protein DICSQDRAFT_138871 [Dichomitus squalens LYAD-421 SS1]	--	--	--	--	GO:0016021 integral component of membrane	gi|597999897|ref|XP_007368283.1|	protein DICSQDRAFT_138871 [Dichomitus squalens LYAD-421 SS1] >gi|395326572|gb|EJF58980.1| hypothetical protein DICSQDRAFT_138871 [Dichomitus squalens LYAD-421 SS1]	--	--	--	--	GO:0016021 integral component of membrane
GL21216-G	58.65	190.447	1.69918	Up	0.826467	gi|597999839|ref|XP_007368267.1|	protein DICSQDRAFT_156493 [Dichomitus squalens LYAD-421 SS1] >gi|395326556|gb|EJF58964.1| hypothetical protein DICSQDRAFT_156493 [Dichomitus squalens LYAD-421 SS1]	dsq:DICSQDRAFT_156493	hypothetical protein; K13344 peroxin-13	GO:0016560 protein import into peroxisome matrix, docking	--	GO:0005777 peroxisome | GO:0016021 integral component of membrane	gi|597999839|ref|XP_007368267.1|	protein DICSQDRAFT_156493 [Dichomitus squalens LYAD-421 SS1] >gi|395326556|gb|EJF58964.1| hypothetical protein DICSQDRAFT_156493 [Dichomitus squalens LYAD-421 SS1]	dsq:DICSQDRAFT_156493	hypothetical protein; K13344 peroxin-13	GO:0016560 protein import into peroxisome matrix, docking	--	GO:0005777 peroxisome | GO:0016021 integral component of membrane
GL21217-G	4.78667	31.13	2.70121	Up	0.825994	gi|597999829|ref|XP_007368264.1|	protein DICSQDRAFT_138858 [Dichomitus squalens LYAD-421 SS1] >gi|395326553|gb|EJF58961.1| hypothetical protein DICSQDRAFT_138858 [Dichomitus squalens LYAD-421 SS1]	pfp:PFL1_05012	hypothetical protein; K12611 mRNA-decapping enzyme 1B [EC:3.-.-.-]	GO:0008152 metabolic process	--	--	gi|597999829|ref|XP_007368264.1|	protein DICSQDRAFT_138858 [Dichomitus squalens LYAD-421 SS1] >gi|395326553|gb|EJF58961.1| hypothetical protein DICSQDRAFT_138858 [Dichomitus squalens LYAD-421 SS1]	pfp:PFL1_05012	hypothetical protein; K12611 mRNA-decapping enzyme 1B [EC:3.-.-.-]	GO:0008152 metabolic process	--	--
GL21225-G	139.793	38.2733	-1.86888	Down	0.848313	gi|597989937|ref|XP_007365700.1|	protein DICSQDRAFT_180619 [Dichomitus squalens LYAD-421 SS1] >gi|395329217|gb|EJF61605.1| hypothetical protein DICSQDRAFT_180619 [Dichomitus squalens LYAD-421 SS1]	ago:AGOS_AFL219W	AFL219Wp; K10802 high mobility group protein B1	--	--	--	gi|597989937|ref|XP_007365700.1|	protein DICSQDRAFT_180619 [Dichomitus squalens LYAD-421 SS1] >gi|395329217|gb|EJF61605.1| hypothetical protein DICSQDRAFT_180619 [Dichomitus squalens LYAD-421 SS1]	ago:AGOS_AFL219W	AFL219Wp; K10802 high mobility group protein B1	--	--	--
GL21226-G	127.273	39.2133	-1.69851	Down	0.816201	gi|597989913|ref|XP_007365693.1|	[Dichomitus squalens LYAD-421 SS1] >gi|395329210|gb|EJF61598.1| Redoxin [Dichomitus squalens LYAD-421 SS1]	dsq:DICSQDRAFT_170013	Redoxin; K14171 alkyl hydroperoxide reductase 1 [EC:1.11.1.15]	GO:0055114 oxidation-reduction process	GO:0016491 oxidoreductase activity	--	gi|597989913|ref|XP_007365693.1|	[Dichomitus squalens LYAD-421 SS1] >gi|395329210|gb|EJF61598.1| Redoxin [Dichomitus squalens LYAD-421 SS1]	dsq:DICSQDRAFT_170013	Redoxin; K14171 alkyl hydroperoxide reductase 1 [EC:1.11.1.15]	GO:0055114 oxidation-reduction process	GO:0016491 oxidoreductase activity	--
GL21250-G	9.47333	77.3367	3.02921	Up	0.921111	gi|597989713|ref|XP_007365639.1|	protein YKT6 [Dichomitus squalens LYAD-421 SS1] >gi|395329156|gb|EJF61544.1| snare protein YKT6 [Dichomitus squalens LYAD-421 SS1]	dsq:DICSQDRAFT_155052	snare protein YKT6; K08516 synaptobrevin homolog YKT6	GO:0016192 vesicle-mediated transport	--	GO:0016021 integral component of membrane	gi|597989713|ref|XP_007365639.1|	protein YKT6 [Dichomitus squalens LYAD-421 SS1] >gi|395329156|gb|EJF61544.1| snare protein YKT6 [Dichomitus squalens LYAD-421 SS1]	dsq:DICSQDRAFT_155052	snare protein YKT6; K08516 synaptobrevin homolog YKT6	GO:0016192 vesicle-mediated transport	--	GO:0016021 integral component of membrane
GL21279-G	26.54	174.693	2.71858	Up	0.93634	gi|597995435|ref|XP_007367126.1|	exchanger [Dichomitus squalens LYAD-421 SS1] >gi|395327775|gb|EJF60172.1| sodium/hydrogen exchanger [Dichomitus squalens LYAD-421 SS1]	dsq:DICSQDRAFT_107884	sodium/hydrogen exchanger; K12041 solute carrier family 9 (sodium/hydrogen exchanger), member 6/7	GO:1902600 hydrogen ion transmembrane transport | GO:0006885 regulation of pH | GO:0035725 sodium ion transmembrane transport	GO:0015385 sodium:proton antiporter activity	GO:0016021 integral component of membrane	gi|597995435|ref|XP_007367126.1|	exchanger [Dichomitus squalens LYAD-421 SS1] >gi|395327775|gb|EJF60172.1| sodium/hydrogen exchanger [Dichomitus squalens LYAD-421 SS1]	dsq:DICSQDRAFT_107884	sodium/hydrogen exchanger; K12041 solute carrier family 9 (sodium/hydrogen exchanger), member 6/7	GO:1902600 hydrogen ion transmembrane transport | GO:0006885 regulation of pH | GO:0035725 sodium ion transmembrane transport	GO:0015385 sodium:proton antiporter activity	GO:0016021 integral component of membrane
GL21285-G	11.6833	86.8133	2.89346	Up	0.921583	gi|597998815|ref|XP_007367994.1|	exopeptidase [Dichomitus squalens LYAD-421 SS1] >gi|395326805|gb|EJF59210.1| Zn-dependent exopeptidase [Dichomitus squalens LYAD-421 SS1]	adl:AURDEDRAFT_116155	Zn-dependent exopeptidase; K05994 bacterial leucyl aminopeptidase [EC:3.4.11.10]	--	--	--	gi|597998815|ref|XP_007367994.1|	exopeptidase [Dichomitus squalens LYAD-421 SS1] >gi|395326805|gb|EJF59210.1| Zn-dependent exopeptidase [Dichomitus squalens LYAD-421 SS1]	adl:AURDEDRAFT_116155	Zn-dependent exopeptidase; K05994 bacterial leucyl aminopeptidase [EC:3.4.11.10]	--	--	--
GL21300-G	18.64	193.443	3.37544	Up	0.962413	gi|598005449|ref|XP_007369765.1|	protein DICSQDRAFT_157341 [Dichomitus squalens LYAD-421 SS1] >gi|395325019|gb|EJF57448.1| hypothetical protein DICSQDRAFT_157341 [Dichomitus squalens LYAD-421 SS1]	--	--	--	--	GO:0016021 integral component of membrane	gi|598005449|ref|XP_007369765.1|	protein DICSQDRAFT_157341 [Dichomitus squalens LYAD-421 SS1] >gi|395325019|gb|EJF57448.1| hypothetical protein DICSQDRAFT_157341 [Dichomitus squalens LYAD-421 SS1]	--	--	--	--	GO:0016021 integral component of membrane
GL21329-G	14.95	63.3033	2.08214	Up	0.841473	gi|598001005|ref|XP_007368567.1|	protein DICSQDRAFT_148939 [Dichomitus squalens LYAD-421 SS1] >gi|395326323|gb|EJF58734.1| hypothetical protein DICSQDRAFT_148939 [Dichomitus squalens LYAD-421 SS1]	--	--	GO:0055114 oxidation-reduction process	GO:0016491 oxidoreductase activity	GO:0005739 mitochondrion	gi|598001005|ref|XP_007368567.1|	protein DICSQDRAFT_148939 [Dichomitus squalens LYAD-421 SS1] >gi|395326323|gb|EJF58734.1| hypothetical protein DICSQDRAFT_148939 [Dichomitus squalens LYAD-421 SS1]	--	--	GO:0055114 oxidation-reduction process	GO:0016491 oxidoreductase activity	GO:0005739 mitochondrion
GL21331-G	21.75	91.32	2.06992	Up	0.861205	gi|598009869|ref|XP_007370886.1|	beta-glucanase [Dichomitus squalens LYAD-421 SS1] >gi|395323927|gb|EJF56379.1| 2 beta-glucanase [Dichomitus squalens LYAD-421 SS1]	pte:PTT_16159	hypothetical protein; K00767 nicotinate-nucleotide pyrophosphorylase (carboxylating) [EC:2.4.2.19]	--	GO:0016787 hydrolase activity	--	gi|598009869|ref|XP_007370886.1|	beta-glucanase [Dichomitus squalens LYAD-421 SS1] >gi|395323927|gb|EJF56379.1| 2 beta-glucanase [Dichomitus squalens LYAD-421 SS1]	pte:PTT_16159	hypothetical protein; K00767 nicotinate-nucleotide pyrophosphorylase (carboxylating) [EC:2.4.2.19]	--	GO:0016787 hydrolase activity	--
GL21334-G	24.18	175.383	2.85863	Up	0.943469	gi|636618739|ref|XP_008040504.1|	protein TRAVEDRAFT_170382 [Trametes versicolor FP-101664 SS1] >gi|392563286|gb|EIW56465.1| hypothetical protein TRAVEDRAFT_170382 [Trametes versicolor FP-101664 SS1]	--	--	--	--	GO:0016021 integral component of membrane	gi|636618739|ref|XP_008040504.1|	protein TRAVEDRAFT_170382 [Trametes versicolor FP-101664 SS1] >gi|392563286|gb|EIW56465.1| hypothetical protein TRAVEDRAFT_170382 [Trametes versicolor FP-101664 SS1]	--	--	--	--	GO:0016021 integral component of membrane
GL21339-G	55.43	233.667	2.07571	Up	0.889458	gi|597995425|ref|XP_007367123.1|	protein DICSQDRAFT_155918 [Dichomitus squalens LYAD-421 SS1] >gi|395327772|gb|EJF60169.1| hypothetical protein DICSQDRAFT_155918 [Dichomitus squalens LYAD-421 SS1]	--	--	--	--	GO:0016021 integral component of membrane	gi|597995425|ref|XP_007367123.1|	protein DICSQDRAFT_155918 [Dichomitus squalens LYAD-421 SS1] >gi|395327772|gb|EJF60169.1| hypothetical protein DICSQDRAFT_155918 [Dichomitus squalens LYAD-421 SS1]	--	--	--	--	GO:0016021 integral component of membrane
GL21348-G	489.787	1467.99	1.58362	Up	0.820572	gi|598005457|ref|XP_007369767.1|	protein DICSQDRAFT_129458 [Dichomitus squalens LYAD-421 SS1] >gi|395325021|gb|EJF57450.1| hypothetical protein DICSQDRAFT_129458 [Dichomitus squalens LYAD-421 SS1]	--	--	--	--	GO:0016021 integral component of membrane	gi|598005457|ref|XP_007369767.1|	protein DICSQDRAFT_129458 [Dichomitus squalens LYAD-421 SS1] >gi|395325021|gb|EJF57450.1| hypothetical protein DICSQDRAFT_129458 [Dichomitus squalens LYAD-421 SS1]	--	--	--	--	GO:0016021 integral component of membrane
GL21350-G	55.3533	9.49333	-2.54368	Down	0.873914	gi|597996043|ref|XP_007367284.1|	[Dichomitus squalens LYAD-421 SS1] >gi|395327673|gb|EJF60071.1| aspergillopepsin [Dichomitus squalens LYAD-421 SS1]	--	--	GO:0006508 proteolysis	GO:0004190 aspartic-type endopeptidase activity	--	gi|597996043|ref|XP_007367284.1|	[Dichomitus squalens LYAD-421 SS1] >gi|395327673|gb|EJF60071.1| aspergillopepsin [Dichomitus squalens LYAD-421 SS1]	--	--	GO:0006508 proteolysis	GO:0004190 aspartic-type endopeptidase activity	--
GL21354-G	37.69	2.23	-4.07907	Down	0.890902	gi|598005591|ref|XP_007369804.1|	oxidase-like protein [Dichomitus squalens LYAD-421 SS1] >gi|395325058|gb|EJF57487.1| alcohol oxidase-like protein [Dichomitus squalens LYAD-421 SS1]	dsq:DICSQDRAFT_157363	alcohol oxidase-like protein; K17066 alcohol oxidase [EC:1.1.3.13]	GO:0055114 oxidation-reduction process	GO:0050660 flavin adenine dinucleotide binding | GO:0016614 oxidoreductase activity, acting on CH-OH group of donors	--	gi|598005591|ref|XP_007369804.1|	oxidase-like protein [Dichomitus squalens LYAD-421 SS1] >gi|395325058|gb|EJF57487.1| alcohol oxidase-like protein [Dichomitus squalens LYAD-421 SS1]	dsq:DICSQDRAFT_157363	alcohol oxidase-like protein; K17066 alcohol oxidase [EC:1.1.3.13]	GO:0055114 oxidation-reduction process	GO:0050660 flavin adenine dinucleotide binding | GO:0016614 oxidoreductase activity, acting on CH-OH group of donors	--
GL21366-G	14.3267	125.463	3.13049	Up	0.945307	gi|597995235|ref|XP_007367076.1|	oxidase [Dichomitus squalens LYAD-421 SS1] >gi|395327725|gb|EJF60122.1| L-gulonolactone/D-arabinono-1,4-lactone oxidase [Dichomitus squalens LYAD-421 SS1]	lbc:LACBIDRAFT_248838	gulonolactone oxidase Lgo1; K00103 L-gulonolactone oxidase [EC:1.1.3.8]	GO:0055114 oxidation-reduction process	GO:0050660 flavin adenine dinucleotide binding | GO:0003885 D-arabinono-1,4-lactone oxidase activity	GO:0016020 membrane	gi|597995235|ref|XP_007367076.1|	oxidase [Dichomitus squalens LYAD-421 SS1] >gi|395327725|gb|EJF60122.1| L-gulonolactone/D-arabinono-1,4-lactone oxidase [Dichomitus squalens LYAD-421 SS1]	lbc:LACBIDRAFT_248838	gulonolactone oxidase Lgo1; K00103 L-gulonolactone oxidase [EC:1.1.3.8]	GO:0055114 oxidation-reduction process	GO:0050660 flavin adenine dinucleotide binding | GO:0003885 D-arabinono-1,4-lactone oxidase activity	GO:0016020 membrane
GL21373-G	3109.94	940.05	-1.72608	Down	0.850295	gi|597995361|ref|XP_007367107.1|	exchange factors-like protein [Dichomitus squalens LYAD-421 SS1] >gi|395327756|gb|EJF60153.1| nucleotide exchange factors-like protein [Dichomitus squalens LYAD-421 SS1]	--	--	--	--	--	gi|597995361|ref|XP_007367107.1|	exchange factors-like protein [Dichomitus squalens LYAD-421 SS1] >gi|395327756|gb|EJF60153.1| nucleotide exchange factors-like protein [Dichomitus squalens LYAD-421 SS1]	--	--	--	--	--
GL21378-G	2.47	24.2233	3.29381	Up	0.818078	gi|598001009|ref|XP_007368568.1|	protein DICSQDRAFT_66429 [Dichomitus squalens LYAD-421 SS1] >gi|395326324|gb|EJF58735.1| hypothetical protein DICSQDRAFT_66429 [Dichomitus squalens LYAD-421 SS1]	dsq:DICSQDRAFT_66429	hypothetical protein; K15710 E3 ubiquitin-protein ligase SHPRH [EC:3.6.4.- 2.3.2.27]	--	GO:0005524 ATP binding | GO:0008270 zinc ion binding	--	gi|598001009|ref|XP_007368568.1|	protein DICSQDRAFT_66429 [Dichomitus squalens LYAD-421 SS1] >gi|395326324|gb|EJF58735.1| hypothetical protein DICSQDRAFT_66429 [Dichomitus squalens LYAD-421 SS1]	dsq:DICSQDRAFT_66429	hypothetical protein; K15710 E3 ubiquitin-protein ligase SHPRH [EC:3.6.4.- 2.3.2.27]	--	GO:0005524 ATP binding | GO:0008270 zinc ion binding	--
GL21394-G	17.3233	63.28	1.86903	Up	0.810805	gi|636618733|ref|XP_008040501.1|	protein TRAVEDRAFT_128085 [Trametes versicolor FP-101664 SS1] >gi|392563280|gb|EIW56459.1| hypothetical protein TRAVEDRAFT_128085 [Trametes versicolor FP-101664 SS1]	dsq:DICSQDRAFT_148070	hypothetical protein; K03217 YidC/Oxa1 family membrane protein insertase	GO:0051205 protein insertion into membrane	--	GO:0016021 integral component of membrane	gi|636618733|ref|XP_008040501.1|	protein TRAVEDRAFT_128085 [Trametes versicolor FP-101664 SS1] >gi|392563280|gb|EIW56459.1| hypothetical protein TRAVEDRAFT_128085 [Trametes versicolor FP-101664 SS1]	dsq:DICSQDRAFT_148070	hypothetical protein; K03217 YidC/Oxa1 family membrane protein insertase	GO:0051205 protein insertion into membrane	--	GO:0016021 integral component of membrane
GL21412-G	12.7033	102.34	3.01009	Up	0.933767	gi|597999073|ref|XP_007368058.1|	reticulum protein [Dichomitus squalens LYAD-421 SS1] >gi|395326872|gb|EJF59277.1| endoplasmic reticulum protein [Dichomitus squalens LYAD-421 SS1]	npa:UCRNP2_9635	putative bap31 domain protein; K20405 nitrogen permease regulator 2-like protein	GO:0006886 intracellular protein transport	--	GO:0016021 integral component of membrane | GO:0005783 endoplasmic reticulum	gi|597999073|ref|XP_007368058.1|	reticulum protein [Dichomitus squalens LYAD-421 SS1] >gi|395326872|gb|EJF59277.1| endoplasmic reticulum protein [Dichomitus squalens LYAD-421 SS1]	npa:UCRNP2_9635	putative bap31 domain protein; K20405 nitrogen permease regulator 2-like protein	GO:0006886 intracellular protein transport	--	GO:0016021 integral component of membrane | GO:0005783 endoplasmic reticulum
GL21443-G	19.65	81.2967	2.04867	Up	0.853394	gi|597995191|ref|XP_007367065.1|	protein DICSQDRAFT_107777 [Dichomitus squalens LYAD-421 SS1] >gi|395327714|gb|EJF60111.1| hypothetical protein DICSQDRAFT_107777 [Dichomitus squalens LYAD-421 SS1]	--	--	GO:0006886 intracellular protein transport	--	GO:0005622 intracellular	gi|597995191|ref|XP_007367065.1|	protein DICSQDRAFT_107777 [Dichomitus squalens LYAD-421 SS1] >gi|395327714|gb|EJF60111.1| hypothetical protein DICSQDRAFT_107777 [Dichomitus squalens LYAD-421 SS1]	--	--	GO:0006886 intracellular protein transport	--	GO:0005622 intracellular
GL21452-G	6.34333	39.4633	2.6372	Up	0.849678	gi|597995269|ref|XP_007367084.1|	vesicle protein transport Sft2 [Dichomitus squalens LYAD-421 SS1] >gi|395327733|gb|EJF60130.1| ER-to-golgi vesicle protein transport Sft2 [Dichomitus squalens LYAD-421 SS1]	--	--	GO:0016192 vesicle-mediated transport	--	GO:0016021 integral component of membrane	gi|597995269|ref|XP_007367084.1|	vesicle protein transport Sft2 [Dichomitus squalens LYAD-421 SS1] >gi|395327733|gb|EJF60130.1| ER-to-golgi vesicle protein transport Sft2 [Dichomitus squalens LYAD-421 SS1]	--	--	GO:0016192 vesicle-mediated transport	--	GO:0016021 integral component of membrane
GL21461-G	9.86667	81.6667	3.04911	Up	0.924577	gi|598012533|ref|XP_007371525.1|	protein [Dichomitus squalens LYAD-421 SS1] >gi|395323247|gb|EJF55729.1| ABC1-domain-containing protein [Dichomitus squalens LYAD-421 SS1]	dsq:DICSQDRAFT_164172	ABC1-domain-containing protein; K08869 aarF domain-containing kinase	--	--	--	gi|598012533|ref|XP_007371525.1|	protein [Dichomitus squalens LYAD-421 SS1] >gi|395323247|gb|EJF55729.1| ABC1-domain-containing protein [Dichomitus squalens LYAD-421 SS1]	dsq:DICSQDRAFT_164172	ABC1-domain-containing protein; K08869 aarF domain-containing kinase	--	--	--
GL21467-G	46.01	220.117	2.25825	Up	0.907089	gi|598005167|ref|XP_007369686.1|	protein DICSQDRAFT_140265 [Dichomitus squalens LYAD-421 SS1] >gi|395325163|gb|EJF57590.1| hypothetical protein DICSQDRAFT_140265 [Dichomitus squalens LYAD-421 SS1]	--	--	--	--	--	gi|598005167|ref|XP_007369686.1|	protein DICSQDRAFT_140265 [Dichomitus squalens LYAD-421 SS1] >gi|395325163|gb|EJF57590.1| hypothetical protein DICSQDRAFT_140265 [Dichomitus squalens LYAD-421 SS1]	--	--	--	--	--
GL21494-G	13.55	73.7333	2.44402	Up	0.886294	gi|598007867|ref|XP_007370428.1|	transferase [Dichomitus squalens LYAD-421 SS1] >gi|395324396|gb|EJF56837.1| nucleotide-diphospho-sugar transferase [Dichomitus squalens LYAD-421 SS1]	hir:HETIRDRAFT_63265	glycosyltransferase family 8 protein; K00750 glycogenin [EC:2.4.1.186]	GO:0008152 metabolic process	GO:0016757 transferase activity, transferring glycosyl groups	GO:0016021 integral component of membrane	gi|598007867|ref|XP_007370428.1|	transferase [Dichomitus squalens LYAD-421 SS1] >gi|395324396|gb|EJF56837.1| nucleotide-diphospho-sugar transferase [Dichomitus squalens LYAD-421 SS1]	hir:HETIRDRAFT_63265	glycosyltransferase family 8 protein; K00750 glycogenin [EC:2.4.1.186]	GO:0008152 metabolic process	GO:0016757 transferase activity, transferring glycosyl groups	GO:0016021 integral component of membrane
GL21495-G	0.73	20.8633	4.2943	Up	0.817185	gi|598007839|ref|XP_007370414.1|	protein DICSQDRAFT_150172 [Dichomitus squalens LYAD-421 SS1] >gi|395324382|gb|EJF56823.1| hypothetical protein DICSQDRAFT_150172 [Dichomitus squalens LYAD-421 SS1]	--	--	--	--	GO:0016021 integral component of membrane	gi|598007839|ref|XP_007370414.1|	protein DICSQDRAFT_150172 [Dichomitus squalens LYAD-421 SS1] >gi|395324382|gb|EJF56823.1| hypothetical protein DICSQDRAFT_150172 [Dichomitus squalens LYAD-421 SS1]	--	--	--	--	GO:0016021 integral component of membrane
GL21512-G	17.1367	104.207	2.60429	Up	0.914888	gi|597993221|ref|XP_007366561.1|	protein DICSQDRAFT_147706 [Dichomitus squalens LYAD-421 SS1] >gi|395328331|gb|EJF60724.1| hypothetical protein DICSQDRAFT_147706 [Dichomitus squalens LYAD-421 SS1]	--	--	GO:0055114 oxidation-reduction process	GO:0016491 oxidoreductase activity	--	gi|597993221|ref|XP_007366561.1|	protein DICSQDRAFT_147706 [Dichomitus squalens LYAD-421 SS1] >gi|395328331|gb|EJF60724.1| hypothetical protein DICSQDRAFT_147706 [Dichomitus squalens LYAD-421 SS1]	--	--	GO:0055114 oxidation-reduction process	GO:0016491 oxidoreductase activity	--
GL21523-G	161.357	1701.83	3.39876	Up	0.978364	gi|598005199|ref|XP_007369695.1|	protein DICSQDRAFT_157294 [Dichomitus squalens LYAD-421 SS1] >gi|395325172|gb|EJF57599.1| hypothetical protein DICSQDRAFT_157294 [Dichomitus squalens LYAD-421 SS1]	--	--	--	--	--	gi|598005199|ref|XP_007369695.1|	protein DICSQDRAFT_157294 [Dichomitus squalens LYAD-421 SS1] >gi|395325172|gb|EJF57599.1| hypothetical protein DICSQDRAFT_157294 [Dichomitus squalens LYAD-421 SS1]	--	--	--	--	--
GL21538-G	12.4467	53.2967	2.09829	Up	0.830589	gi|598005353|ref|XP_007369737.1|	of early ER protein Rer1 [Dichomitus squalens LYAD-421 SS1] >gi|395325113|gb|EJF57541.1| retrieval of early ER protein Rer1 [Dichomitus squalens LYAD-421 SS1]	--	--	--	--	GO:0016021 integral component of membrane	gi|598005353|ref|XP_007369737.1|	of early ER protein Rer1 [Dichomitus squalens LYAD-421 SS1] >gi|395325113|gb|EJF57541.1| retrieval of early ER protein Rer1 [Dichomitus squalens LYAD-421 SS1]	--	--	--	--	GO:0016021 integral component of membrane
GL21539-G	73.5467	20.8133	-1.82115	Down	0.811934	gi|598005413|ref|XP_007369755.1|	domain-containing protein [Dichomitus squalens LYAD-421 SS1] >gi|395325131|gb|EJF57559.1| Phosphoenolpyruvate/pyruvate domain-containing protein [Dichomitus squalens LYAD-421 SS1]	afm:AFUA_2G03820	carboxyphosphonoenolpyruvate phosphonomutase; K03417 methylisocitrate lyase [EC:4.1.3.30]	GO:0008152 metabolic process	GO:0016787 hydrolase activity	--	gi|598005413|ref|XP_007369755.1|	domain-containing protein [Dichomitus squalens LYAD-421 SS1] >gi|395325131|gb|EJF57559.1| Phosphoenolpyruvate/pyruvate domain-containing protein [Dichomitus squalens LYAD-421 SS1]	afm:AFUA_2G03820	carboxyphosphonoenolpyruvate phosphonomutase; K03417 methylisocitrate lyase [EC:4.1.3.30]	GO:0008152 metabolic process	GO:0016787 hydrolase activity	--
GL21587-G	6.67333	37.88	2.50496	Up	0.835079	gi|598005373|ref|XP_007369745.1|	protein DICSQDRAFT_140310 [Dichomitus squalens LYAD-421 SS1] >gi|395325121|gb|EJF57549.1| hypothetical protein DICSQDRAFT_140310 [Dichomitus squalens LYAD-421 SS1]	dsq:DICSQDRAFT_140310	hypothetical protein; K03260 translation initiation factor 4G	--	GO:0003723 RNA binding	--	gi|598005373|ref|XP_007369745.1|	protein DICSQDRAFT_140310 [Dichomitus squalens LYAD-421 SS1] >gi|395325121|gb|EJF57549.1| hypothetical protein DICSQDRAFT_140310 [Dichomitus squalens LYAD-421 SS1]	dsq:DICSQDRAFT_140310	hypothetical protein; K03260 translation initiation factor 4G	--	GO:0003723 RNA binding	--
GL21590-G	20.3467	165.89	3.02736	Up	0.948615	--	--	--	--	--	--	--	--	--	--	--	--	--	--
GL21591-G	21.9933	135.22	2.62017	Up	0.924721	gi|598007857|ref|XP_007370423.1|	protein DICSQDRAFT_174514 [Dichomitus squalens LYAD-421 SS1] >gi|395324391|gb|EJF56832.1| hypothetical protein DICSQDRAFT_174514 [Dichomitus squalens LYAD-421 SS1]	dsq:DICSQDRAFT_174514	hypothetical protein; K03260 translation initiation factor 4G	--	--	--	gi|598007857|ref|XP_007370423.1|	protein DICSQDRAFT_174514 [Dichomitus squalens LYAD-421 SS1] >gi|395324391|gb|EJF56832.1| hypothetical protein DICSQDRAFT_174514 [Dichomitus squalens LYAD-421 SS1]	dsq:DICSQDRAFT_174514	hypothetical protein; K03260 translation initiation factor 4G	--	--	--
GL21611-G	23.2167	2.73333	-3.08643	Down	0.804477	gi|636624017|ref|XP_008043143.1|	protein TRAVEDRAFT_132446 [Trametes versicolor FP-101664 SS1] >gi|392561118|gb|EIW54300.1| hypothetical protein TRAVEDRAFT_132446 [Trametes versicolor FP-101664 SS1]	--	--	--	--	--	gi|636624017|ref|XP_008043143.1|	protein TRAVEDRAFT_132446 [Trametes versicolor FP-101664 SS1] >gi|392561118|gb|EIW54300.1| hypothetical protein TRAVEDRAFT_132446 [Trametes versicolor FP-101664 SS1]	--	--	--	--	--
GL21619-G	14.2867	60.6333	2.08544	Up	0.839806	gi|414527128|gb|AFX00736.1|	transporting ATPase [Ganoderma lucidum]	pco:PHACADRAFT_163996	hypothetical protein; K01537 Ca2+-transporting ATPase [EC:3.6.3.8]	GO:0070588 calcium ion transmembrane transport | GO:0008152 metabolic process	GO:0005388 calcium-transporting ATPase activity | GO:0046872 metal ion binding | GO:0005524 ATP binding	GO:0016021 integral component of membrane	gi|414527128|gb|AFX00736.1|	transporting ATPase [Ganoderma lucidum]	pco:PHACADRAFT_163996	hypothetical protein; K01537 Ca2+-transporting ATPase [EC:3.6.3.8]	GO:0070588 calcium ion transmembrane transport | GO:0008152 metabolic process	GO:0005388 calcium-transporting ATPase activity | GO:0046872 metal ion binding | GO:0005524 ATP binding	GO:0016021 integral component of membrane
GL21624-G	27.91	145.123	2.37843	Up	0.909203	gi|597980531|ref|XP_007363272.1|	protein DICSQDRAFT_178870 [Dichomitus squalens LYAD-421 SS1] >gi|395332081|gb|EJF64461.1| hypothetical protein DICSQDRAFT_178870 [Dichomitus squalens LYAD-421 SS1]	--	--	--	--	--	gi|597980531|ref|XP_007363272.1|	protein DICSQDRAFT_178870 [Dichomitus squalens LYAD-421 SS1] >gi|395332081|gb|EJF64461.1| hypothetical protein DICSQDRAFT_178870 [Dichomitus squalens LYAD-421 SS1]	--	--	--	--	--
GL21627-G	27.31	99	1.858	Up	0.83374	gi|597980481|ref|XP_007363259.1|	protein DICSQDRAFT_153454 [Dichomitus squalens LYAD-421 SS1] >gi|395332068|gb|EJF64448.1| hypothetical protein DICSQDRAFT_153454 [Dichomitus squalens LYAD-421 SS1]	--	--	--	--	GO:0016021 integral component of membrane	gi|597980481|ref|XP_007363259.1|	protein DICSQDRAFT_153454 [Dichomitus squalens LYAD-421 SS1] >gi|395332068|gb|EJF64448.1| hypothetical protein DICSQDRAFT_153454 [Dichomitus squalens LYAD-421 SS1]	--	--	--	--	GO:0016021 integral component of membrane
GL21631-G	42.42	289.857	2.77252	Up	0.946724	gi|597980407|ref|XP_007363239.1|	protein DICSQDRAFT_81699 [Dichomitus squalens LYAD-421 SS1] >gi|395332048|gb|EJF64428.1| hypothetical protein DICSQDRAFT_81699 [Dichomitus squalens LYAD-421 SS1]	dsq:DICSQDRAFT_81699	hypothetical protein; K08504 blocked early in transport 1	--	--	GO:0016021 integral component of membrane	gi|597980407|ref|XP_007363239.1|	protein DICSQDRAFT_81699 [Dichomitus squalens LYAD-421 SS1] >gi|395332048|gb|EJF64428.1| hypothetical protein DICSQDRAFT_81699 [Dichomitus squalens LYAD-421 SS1]	dsq:DICSQDRAFT_81699	hypothetical protein; K08504 blocked early in transport 1	--	--	GO:0016021 integral component of membrane
GL21641-G	10.71	56.9933	2.41183	Up	0.866181	gi|597980241|ref|XP_007363198.1|	[Dichomitus squalens LYAD-421 SS1] >gi|395332007|gb|EJF64387.1| RCC1/BLIP-II [Dichomitus squalens LYAD-421 SS1]	dsq:DICSQDRAFT_125356	squalene synthase; K00801 farnesyl-diphosphate farnesyltransferase [EC:2.5.1.21]	GO:0050709 negative regulation of protein secretion	GO:0008270 zinc ion binding	--	gi|597980241|ref|XP_007363198.1|	[Dichomitus squalens LYAD-421 SS1] >gi|395332007|gb|EJF64387.1| RCC1/BLIP-II [Dichomitus squalens LYAD-421 SS1]	dsq:DICSQDRAFT_125356	squalene synthase; K00801 farnesyl-diphosphate farnesyltransferase [EC:2.5.1.21]	GO:0050709 negative regulation of protein secretion	GO:0008270 zinc ion binding	--
GL21647-G	3.79	26.61	2.8117	Up	0.811291	gi|597980233|ref|XP_007363196.1|	[Dichomitus squalens LYAD-421 SS1] >gi|395332005|gb|EJF64385.1| RCC1/BLIP-II [Dichomitus squalens LYAD-421 SS1]	dsq:DICSQDRAFT_160146	RCC1/BLIP-II; K15072 SCF-associated factor 1	--	--	--	gi|597980233|ref|XP_007363196.1|	[Dichomitus squalens LYAD-421 SS1] >gi|395332005|gb|EJF64385.1| RCC1/BLIP-II [Dichomitus squalens LYAD-421 SS1]	dsq:DICSQDRAFT_160146	RCC1/BLIP-II; K15072 SCF-associated factor 1	--	--	--
GL21655-G	6.66667	68.6533	3.36429	Up	0.926546	gi|597979929|ref|XP_007363120.1|	protein DICSQDRAFT_101178 [Dichomitus squalens LYAD-421 SS1] >gi|395331929|gb|EJF64309.1| hypothetical protein DICSQDRAFT_101178 [Dichomitus squalens LYAD-421 SS1]	--	--	--	--	GO:0016020 membrane	gi|597979929|ref|XP_007363120.1|	protein DICSQDRAFT_101178 [Dichomitus squalens LYAD-421 SS1] >gi|395331929|gb|EJF64309.1| hypothetical protein DICSQDRAFT_101178 [Dichomitus squalens LYAD-421 SS1]	--	--	--	--	GO:0016020 membrane
GL21658-G	3.22667	24.27	2.91106	Up	0.802993	--	--	--	--	--	--	--	--	--	--	--	--	--	--
GL21667-G	42.2067	6.43	-2.71458	Down	0.860864	gi|636615393|ref|XP_008038831.1|	protein 60S [Trametes versicolor FP-101664 SS1] >gi|392565461|gb|EIW58638.1| ribosomal protein 60S [Trametes versicolor FP-101664 SS1]	cput:CONPUDRAFT_91525	ribosomal protein 60S; K02943 large subunit ribosomal protein LP2	GO:0006414 translational elongation	GO:0003735 structural constituent of ribosome	GO:0005840 ribosome	gi|636615393|ref|XP_008038831.1|	protein 60S [Trametes versicolor FP-101664 SS1] >gi|392565461|gb|EIW58638.1| ribosomal protein 60S [Trametes versicolor FP-101664 SS1]	cput:CONPUDRAFT_91525	ribosomal protein 60S; K02943 large subunit ribosomal protein LP2	GO:0006414 translational elongation	GO:0003735 structural constituent of ribosome	GO:0005840 ribosome
GL21669-G	24.0267	122.547	2.35062	Up	0.901772	gi|597979545|ref|XP_007363024.1|	protein DICSQDRAFT_160058 [Dichomitus squalens LYAD-421 SS1] >gi|395331833|gb|EJF64213.1| hypothetical protein DICSQDRAFT_160058 [Dichomitus squalens LYAD-421 SS1]	--	--	--	--	--	gi|597979545|ref|XP_007363024.1|	protein DICSQDRAFT_160058 [Dichomitus squalens LYAD-421 SS1] >gi|395331833|gb|EJF64213.1| hypothetical protein DICSQDRAFT_160058 [Dichomitus squalens LYAD-421 SS1]	--	--	--	--	--
GL21672-G	20.3467	130.667	2.68303	Up	0.927189	gi|597979453|ref|XP_007363001.1|	transporter, partial [Dichomitus squalens LYAD-421 SS1] >gi|395331810|gb|EJF64190.1| UDP-galactose transporter, partial [Dichomitus squalens LYAD-421 SS1]	dsq:DICSQDRAFT_53311	UDP-galactose transporter; K15356 GDP-mannose transporter	GO:0055085 transmembrane transport	--	GO:0016021 integral component of membrane	gi|597979453|ref|XP_007363001.1|	transporter, partial [Dichomitus squalens LYAD-421 SS1] >gi|395331810|gb|EJF64190.1| UDP-galactose transporter, partial [Dichomitus squalens LYAD-421 SS1]	dsq:DICSQDRAFT_53311	UDP-galactose transporter; K15356 GDP-mannose transporter	GO:0055085 transmembrane transport	--	GO:0016021 integral component of membrane
GL21679-G	95.51	326.503	1.77337	Up	0.847184	gi|597990829|ref|XP_007365927.1|	transport v-snare protein vti1 [Dichomitus squalens LYAD-421 SS1] >gi|395329093|gb|EJF61482.1| vesicle transport v-snare protein vti1 [Dichomitus squalens LYAD-421 SS1]	dsq:DICSQDRAFT_60548	vesicle transport v-snare protein vti1; K08493 vesicle transport through interaction with t-SNAREs 1	GO:0016192 vesicle-mediated transport | GO:0006886 intracellular protein transport	--	GO:0016021 integral component of membrane | GO:0005622 intracellular	gi|597990829|ref|XP_007365927.1|	transport v-snare protein vti1 [Dichomitus squalens LYAD-421 SS1] >gi|395329093|gb|EJF61482.1| vesicle transport v-snare protein vti1 [Dichomitus squalens LYAD-421 SS1]	dsq:DICSQDRAFT_60548	vesicle transport v-snare protein vti1; K08493 vesicle transport through interaction with t-SNAREs 1	GO:0016192 vesicle-mediated transport | GO:0006886 intracellular protein transport	--	GO:0016021 integral component of membrane | GO:0005622 intracellular
GL21694-G	2.74333	28.6233	3.38319	Up	0.844296	gi|636614211|ref|XP_008038240.1|	repeat-like protein [Trametes versicolor FP-101664 SS1] >gi|392565144|gb|EIW58321.1| WD40 repeat-like protein [Trametes versicolor FP-101664 SS1]	ppl:POSPLDRAFT_99159	hypothetical WD-repeat protein; K14855 ribosome assembly protein 4	--	--	--	gi|636614211|ref|XP_008038240.1|	repeat-like protein [Trametes versicolor FP-101664 SS1] >gi|392565144|gb|EIW58321.1| WD40 repeat-like protein [Trametes versicolor FP-101664 SS1]	ppl:POSPLDRAFT_99159	hypothetical WD-repeat protein; K14855 ribosome assembly protein 4	--	--	--
GL21704-G	15.0967	100.543	2.73552	Up	0.921019	gi|597979721|ref|XP_007363068.1|	protein DICSQDRAFT_133940 [Dichomitus squalens LYAD-421 SS1] >gi|395331877|gb|EJF64257.1| hypothetical protein DICSQDRAFT_133940 [Dichomitus squalens LYAD-421 SS1]	mlr:MELLADRAFT_95260	hypothetical protein; K11362 transcriptional coactivator HFI1/ADA1	--	--	--	gi|597979721|ref|XP_007363068.1|	protein DICSQDRAFT_133940 [Dichomitus squalens LYAD-421 SS1] >gi|395331877|gb|EJF64257.1| hypothetical protein DICSQDRAFT_133940 [Dichomitus squalens LYAD-421 SS1]	mlr:MELLADRAFT_95260	hypothetical protein; K11362 transcriptional coactivator HFI1/ADA1	--	--	--
GL21705-G	12.3833	67.4	2.44435	Up	0.880491	gi|597979713|ref|XP_007363066.1|	initiation factor IID TAF10 subunit [Dichomitus squalens LYAD-421 SS1] >gi|395331875|gb|EJF64255.1| transcription initiation factor IID TAF10 subunit [Dichomitus squalens LYAD-421 SS1]	dsq:DICSQDRAFT_153335	transcription initiation factor IID TAF10 subunit; K03134 transcription initiation factor TFIID subunit 10	GO:0006413 translational initiation | GO:0006352 DNA-templated transcription, initiation	GO:0003743 translation initiation factor activity	GO:0005634 nucleus	gi|597979713|ref|XP_007363066.1|	initiation factor IID TAF10 subunit [Dichomitus squalens LYAD-421 SS1] >gi|395331875|gb|EJF64255.1| transcription initiation factor IID TAF10 subunit [Dichomitus squalens LYAD-421 SS1]	dsq:DICSQDRAFT_153335	transcription initiation factor IID TAF10 subunit; K03134 transcription initiation factor TFIID subunit 10	GO:0006413 translational initiation | GO:0006352 DNA-templated transcription, initiation	GO:0003743 translation initiation factor activity	GO:0005634 nucleus
GL21715-G	28.17	94.33	1.74356	Up	0.811986	gi|597979441|ref|XP_007362998.1|	ribonucleo protein [Dichomitus squalens LYAD-421 SS1] >gi|395331807|gb|EJF64187.1| Sm-like ribonucleo protein [Dichomitus squalens LYAD-421 SS1]	dsq:DICSQDRAFT_100902	Sm-like ribonucleo protein; K11086 small nuclear ribonucleoprotein B and B'	--	--	--	gi|597979441|ref|XP_007362998.1|	ribonucleo protein [Dichomitus squalens LYAD-421 SS1] >gi|395331807|gb|EJF64187.1| Sm-like ribonucleo protein [Dichomitus squalens LYAD-421 SS1]	dsq:DICSQDRAFT_100902	Sm-like ribonucleo protein; K11086 small nuclear ribonucleoprotein B and B'	--	--	--
GL21716-G	128.87	398.513	1.62871	Up	0.823553	gi|761947120|gb|KIY66862.1|	protein CYLTODRAFT_423062 [Cylindrobasidium torrendii FP15055 ss-10]	shs:STEHIDRAFT_79209	actin filament-coating protein tropomyosin; K17945 tropomyosin, fungi type	--	--	--	gi|761947120|gb|KIY66862.1|	protein CYLTODRAFT_423062 [Cylindrobasidium torrendii FP15055 ss-10]	shs:STEHIDRAFT_79209	actin filament-coating protein tropomyosin; K17945 tropomyosin, fungi type	--	--	--
GL21733-G	19.09	97.6933	2.35544	Up	0.893436	gi|597980409|ref|XP_007363240.1|	transferase STT3 subunit [Dichomitus squalens LYAD-421 SS1] >gi|395332049|gb|EJF64429.1| oligosaccharyl transferase STT3 subunit [Dichomitus squalens LYAD-421 SS1]	dsq:DICSQDRAFT_81702	oligosaccharyl transferase STT3 subunit; K07151 dolichyl-diphosphooligosaccharide--protein glycosyltransferase [EC:2.4.99.18]	GO:0006486 protein glycosylation	GO:0004576 oligosaccharyl transferase activity	GO:0016021 integral component of membrane	gi|597980409|ref|XP_007363240.1|	transferase STT3 subunit [Dichomitus squalens LYAD-421 SS1] >gi|395332049|gb|EJF64429.1| oligosaccharyl transferase STT3 subunit [Dichomitus squalens LYAD-421 SS1]	dsq:DICSQDRAFT_81702	oligosaccharyl transferase STT3 subunit; K07151 dolichyl-diphosphooligosaccharide--protein glycosyltransferase [EC:2.4.99.18]	GO:0006486 protein glycosylation	GO:0004576 oligosaccharyl transferase activity	GO:0016021 integral component of membrane
GL21756-G	5.12667	41.4433	3.01505	Up	0.873887	gi|597980289|ref|XP_007363210.1|	protein DICSQDRAFT_54246 [Dichomitus squalens LYAD-421 SS1] >gi|395332019|gb|EJF64399.1| hypothetical protein DICSQDRAFT_54246 [Dichomitus squalens LYAD-421 SS1]	lbc:LACBIDRAFT_305365	hypothetical protein; K12366 engulfment and cell motility protein 1	--	--	--	gi|597980289|ref|XP_007363210.1|	protein DICSQDRAFT_54246 [Dichomitus squalens LYAD-421 SS1] >gi|395332019|gb|EJF64399.1| hypothetical protein DICSQDRAFT_54246 [Dichomitus squalens LYAD-421 SS1]	lbc:LACBIDRAFT_305365	hypothetical protein; K12366 engulfment and cell motility protein 1	--	--	--
GL21758-G	14.04	185.123	3.72087	Up	0.968163	gi|597969801|ref|XP_007360520.1|	P450 [Dichomitus squalens LYAD-421 SS1] >gi|395334711|gb|EJF67087.1| cytochrome P450 [Dichomitus squalens LYAD-421 SS1]	fpu:FPSE_05313	hypothetical protein; K16261 yeast amino acid transporter	--	GO:0046872 metal ion binding | GO:0016491 oxidoreductase activity	GO:0016020 membrane	gi|597969801|ref|XP_007360520.1|	P450 [Dichomitus squalens LYAD-421 SS1] >gi|395334711|gb|EJF67087.1| cytochrome P450 [Dichomitus squalens LYAD-421 SS1]	fpu:FPSE_05313	hypothetical protein; K16261 yeast amino acid transporter	--	GO:0046872 metal ion binding | GO:0016491 oxidoreductase activity	GO:0016020 membrane
GL21768-G	51.9333	295.377	2.50782	Up	0.931548	gi|597979915|ref|XP_007363116.1|	protein DICSQDRAFT_53381 [Dichomitus squalens LYAD-421 SS1] >gi|395331925|gb|EJF64305.1| hypothetical protein DICSQDRAFT_53381 [Dichomitus squalens LYAD-421 SS1]	pco:PHACADRAFT_214134	hypothetical protein; K03099 son of sevenless	--	--	GO:0016021 integral component of membrane	gi|597979915|ref|XP_007363116.1|	protein DICSQDRAFT_53381 [Dichomitus squalens LYAD-421 SS1] >gi|395331925|gb|EJF64305.1| hypothetical protein DICSQDRAFT_53381 [Dichomitus squalens LYAD-421 SS1]	pco:PHACADRAFT_214134	hypothetical protein; K03099 son of sevenless	--	--	GO:0016021 integral component of membrane
GL21770-G	9.09	66.55	2.87209	Up	0.906604	gi|597979929|ref|XP_007363120.1|	protein DICSQDRAFT_101178 [Dichomitus squalens LYAD-421 SS1] >gi|395331929|gb|EJF64309.1| hypothetical protein DICSQDRAFT_101178 [Dichomitus squalens LYAD-421 SS1]	dsq:DICSQDRAFT_129683	hypothetical protein; K11309 regulator of Ty1 transposition protein 109	--	--	GO:0016021 integral component of membrane	gi|597979929|ref|XP_007363120.1|	protein DICSQDRAFT_101178 [Dichomitus squalens LYAD-421 SS1] >gi|395331929|gb|EJF64309.1| hypothetical protein DICSQDRAFT_101178 [Dichomitus squalens LYAD-421 SS1]	dsq:DICSQDRAFT_129683	hypothetical protein; K11309 regulator of Ty1 transposition protein 109	--	--	GO:0016021 integral component of membrane
GL21783-G	4.66667	28.3033	2.60051	Up	0.807142	gi|597979785|ref|XP_007363084.1|	[Dichomitus squalens LYAD-421 SS1] >gi|395331893|gb|EJF64273.1| gamma-adaptin [Dichomitus squalens LYAD-421 SS1]	dsq:DICSQDRAFT_81461	gamma-adaptin; K12391 AP-1 complex subunit gamma-1	GO:0016192 vesicle-mediated transport | GO:0006886 intracellular protein transport	GO:0008565 protein transporter activity	GO:0005794 Golgi apparatus | GO:0030131 clathrin adaptor complex	gi|597979785|ref|XP_007363084.1|	[Dichomitus squalens LYAD-421 SS1] >gi|395331893|gb|EJF64273.1| gamma-adaptin [Dichomitus squalens LYAD-421 SS1]	dsq:DICSQDRAFT_81461	gamma-adaptin; K12391 AP-1 complex subunit gamma-1	GO:0016192 vesicle-mediated transport | GO:0006886 intracellular protein transport	GO:0008565 protein transporter activity	GO:0005794 Golgi apparatus | GO:0030131 clathrin adaptor complex
GL21786-G	5.89	46.0967	2.96832	Up	0.881922	gi|597979661|ref|XP_007363053.1|	protein DICSQDRAFT_125261 [Dichomitus squalens LYAD-421 SS1] >gi|395331862|gb|EJF64242.1| hypothetical protein DICSQDRAFT_125261 [Dichomitus squalens LYAD-421 SS1]	--	--	GO:0007165 signal transduction	--	--	gi|597979661|ref|XP_007363053.1|	protein DICSQDRAFT_125261 [Dichomitus squalens LYAD-421 SS1] >gi|395331862|gb|EJF64242.1| hypothetical protein DICSQDRAFT_125261 [Dichomitus squalens LYAD-421 SS1]	--	--	GO:0007165 signal transduction	--	--
GL21792-G	18.7833	77.27	2.04046	Up	0.849311	gi|597979649|ref|XP_007363050.1|	fission 1 protein [Dichomitus squalens LYAD-421 SS1] >gi|395331859|gb|EJF64239.1| mitochondrial fission 1 protein [Dichomitus squalens LYAD-421 SS1]	dsq:DICSQDRAFT_81385	mitochondrial fission 1 protein; K17969 mitochondrial fission 1 protein	--	--	GO:0016020 membrane	gi|597979649|ref|XP_007363050.1|	fission 1 protein [Dichomitus squalens LYAD-421 SS1] >gi|395331859|gb|EJF64239.1| mitochondrial fission 1 protein [Dichomitus squalens LYAD-421 SS1]	dsq:DICSQDRAFT_81385	mitochondrial fission 1 protein; K17969 mitochondrial fission 1 protein	--	--	GO:0016020 membrane
GL21804-G	20.7	90.2367	2.12408	Up	0.86605	gi|597979537|ref|XP_007363022.1|	protein DICSQDRAFT_153302 [Dichomitus squalens LYAD-421 SS1] >gi|395331831|gb|EJF64211.1| hypothetical protein DICSQDRAFT_153302 [Dichomitus squalens LYAD-421 SS1]	dsq:DICSQDRAFT_153302	hypothetical protein; K12821 pre-mRNA-processing factor 40	--	--	--	gi|597979537|ref|XP_007363022.1|	protein DICSQDRAFT_153302 [Dichomitus squalens LYAD-421 SS1] >gi|395331831|gb|EJF64211.1| hypothetical protein DICSQDRAFT_153302 [Dichomitus squalens LYAD-421 SS1]	dsq:DICSQDRAFT_153302	hypothetical protein; K12821 pre-mRNA-processing factor 40	--	--	--
GL21809-G	51.8667	225.173	2.11816	Up	0.893002	gi|597979387|ref|XP_007362983.1|	protein DICSQDRAFT_53698 [Dichomitus squalens LYAD-421 SS1] >gi|395331792|gb|EJF64172.1| hypothetical protein DICSQDRAFT_53698 [Dichomitus squalens LYAD-421 SS1]	ure:UREG_03877	similar to glucosidase II alpha subunit; K05546 alpha 1,3-glucosidase [EC:3.2.1.84]	--	--	GO:0016021 integral component of membrane	gi|597979387|ref|XP_007362983.1|	protein DICSQDRAFT_53698 [Dichomitus squalens LYAD-421 SS1] >gi|395331792|gb|EJF64172.1| hypothetical protein DICSQDRAFT_53698 [Dichomitus squalens LYAD-421 SS1]	ure:UREG_03877	similar to glucosidase II alpha subunit; K05546 alpha 1,3-glucosidase [EC:3.2.1.84]	--	--	GO:0016021 integral component of membrane
GL21824-G	4.00333	26.8533	2.74583	Up	0.808967	gi|597979163|ref|XP_007362925.1|	protein DICSQDRAFT_81120 [Dichomitus squalens LYAD-421 SS1] >gi|395331734|gb|EJF64114.1| hypothetical protein DICSQDRAFT_81120 [Dichomitus squalens LYAD-421 SS1]	dsq:DICSQDRAFT_81120	hypothetical protein; K17922 sorting nexin-8	--	--	--	gi|597979163|ref|XP_007362925.1|	protein DICSQDRAFT_81120 [Dichomitus squalens LYAD-421 SS1] >gi|395331734|gb|EJF64114.1| hypothetical protein DICSQDRAFT_81120 [Dichomitus squalens LYAD-421 SS1]	dsq:DICSQDRAFT_81120	hypothetical protein; K17922 sorting nexin-8	--	--	--
GL21833-G	23.9433	131.717	2.45974	Up	0.912892	gi|807754145|ref|XP_012181867.1|	protein [Fibroporia radiculosa] >gi|403415884|emb|CCM02584.1| predicted protein [Fibroporia radiculosa]	hir:HETIRDRAFT_323725	hypothetical protein; K12274 translocation protein SEC72	--	--	--	gi|807754145|ref|XP_012181867.1|	protein [Fibroporia radiculosa] >gi|403415884|emb|CCM02584.1| predicted protein [Fibroporia radiculosa]	hir:HETIRDRAFT_323725	hypothetical protein; K12274 translocation protein SEC72	--	--	--
GL21834-G	14.2067	70.9333	2.3199	Up	0.87415	gi|597978883|ref|XP_007362854.1|	protein DICSQDRAFT_80986 [Dichomitus squalens LYAD-421 SS1] >gi|395331663|gb|EJF64043.1| hypothetical protein DICSQDRAFT_80986 [Dichomitus squalens LYAD-421 SS1]	dsq:DICSQDRAFT_80986	hypothetical protein; K17268 coatomer subunit epsilon	GO:0006890 retrograde vesicle-mediated transport, Golgi to ER	GO:0005198 structural molecule activity	GO:0005622 intracellular	gi|597978883|ref|XP_007362854.1|	protein DICSQDRAFT_80986 [Dichomitus squalens LYAD-421 SS1] >gi|395331663|gb|EJF64043.1| hypothetical protein DICSQDRAFT_80986 [Dichomitus squalens LYAD-421 SS1]	dsq:DICSQDRAFT_80986	hypothetical protein; K17268 coatomer subunit epsilon	GO:0006890 retrograde vesicle-mediated transport, Golgi to ER	GO:0005198 structural molecule activity	GO:0005622 intracellular
GL21839-G	14.7133	80.72	2.4558	Up	0.892477	gi|597978859|ref|XP_007362848.1|	protein [Dichomitus squalens LYAD-421 SS1] >gi|395331657|gb|EJF64037.1| Pkinase-domain-containing protein [Dichomitus squalens LYAD-421 SS1]	dsq:DICSQDRAFT_80980	Pkinase-domain-containing protein; K04409 p21-activated kinase 1 [EC:2.7.11.1]	GO:0009987 cellular process	GO:0016301 kinase activity	--	gi|597978859|ref|XP_007362848.1|	protein [Dichomitus squalens LYAD-421 SS1] >gi|395331657|gb|EJF64037.1| Pkinase-domain-containing protein [Dichomitus squalens LYAD-421 SS1]	dsq:DICSQDRAFT_80980	Pkinase-domain-containing protein; K04409 p21-activated kinase 1 [EC:2.7.11.1]	GO:0009987 cellular process	GO:0016301 kinase activity	--
GL21842-G	16.2833	59.6033	1.872	Up	0.806564	gi|597978751|ref|XP_007362820.1|	protein DICSQDRAFT_54166 [Dichomitus squalens LYAD-421 SS1] >gi|395331629|gb|EJF64009.1| hypothetical protein DICSQDRAFT_54166 [Dichomitus squalens LYAD-421 SS1]	--	--	--	--	--	gi|597978751|ref|XP_007362820.1|	protein DICSQDRAFT_54166 [Dichomitus squalens LYAD-421 SS1] >gi|395331629|gb|EJF64009.1| hypothetical protein DICSQDRAFT_54166 [Dichomitus squalens LYAD-421 SS1]	--	--	--	--	--
GL21844-G	54.1367	185.107	1.77368	Up	0.838414	gi|597978707|ref|XP_007362809.1|	glycosidase [Dichomitus squalens LYAD-421 SS1] >gi|395331618|gb|EJF63998.1| seven-hairpin glycosidase [Dichomitus squalens LYAD-421 SS1]	dsq:DICSQDRAFT_100544	seven-hairpin glycosidase; K01230 mannosyl-oligosaccharide alpha-1,2-mannosidase [EC:3.2.1.113]	--	--	--	gi|597978707|ref|XP_007362809.1|	glycosidase [Dichomitus squalens LYAD-421 SS1] >gi|395331618|gb|EJF63998.1| seven-hairpin glycosidase [Dichomitus squalens LYAD-421 SS1]	dsq:DICSQDRAFT_100544	seven-hairpin glycosidase; K01230 mannosyl-oligosaccharide alpha-1,2-mannosidase [EC:3.2.1.113]	--	--	--
GL21852-G	5.45	32.9333	2.59522	Up	0.826703	gi|597998567|ref|XP_007367931.1|	glycosidase [Dichomitus squalens LYAD-421 SS1] >gi|395326944|gb|EJF59348.1| seven-hairpin glycosidase [Dichomitus squalens LYAD-421 SS1]	dsq:DICSQDRAFT_182016	seven-hairpin glycosidase; K01230 mannosyl-oligosaccharide alpha-1,2-mannosidase [EC:3.2.1.113]	--	GO:0016798 hydrolase activity, acting on glycosyl bonds	GO:0016020 membrane	gi|597998567|ref|XP_007367931.1|	glycosidase [Dichomitus squalens LYAD-421 SS1] >gi|395326944|gb|EJF59348.1| seven-hairpin glycosidase [Dichomitus squalens LYAD-421 SS1]	dsq:DICSQDRAFT_182016	seven-hairpin glycosidase; K01230 mannosyl-oligosaccharide alpha-1,2-mannosidase [EC:3.2.1.113]	--	GO:0016798 hydrolase activity, acting on glycosyl bonds	GO:0016020 membrane
GL21857-G	38.9	140.203	1.84968	Up	0.845307	gi|597979361|ref|XP_007362976.1|	protein DICSQDRAFT_100867 [Dichomitus squalens LYAD-421 SS1] >gi|395331785|gb|EJF64165.1| hypothetical protein DICSQDRAFT_100867 [Dichomitus squalens LYAD-421 SS1]	lbc:LACBIDRAFT_191143	hypothetical protein; K17919 sorting nexin-4	--	GO:0035091 phosphatidylinositol binding	--	gi|597979361|ref|XP_007362976.1|	protein DICSQDRAFT_100867 [Dichomitus squalens LYAD-421 SS1] >gi|395331785|gb|EJF64165.1| hypothetical protein DICSQDRAFT_100867 [Dichomitus squalens LYAD-421 SS1]	lbc:LACBIDRAFT_191143	hypothetical protein; K17919 sorting nexin-4	--	GO:0035091 phosphatidylinositol binding	--
GL21858-G	6.99	42.4167	2.60127	Up	0.854588	gi|597979353|ref|XP_007362974.1|	protein DICSQDRAFT_100861 [Dichomitus squalens LYAD-421 SS1] >gi|395331783|gb|EJF64163.1| hypothetical protein DICSQDRAFT_100861 [Dichomitus squalens LYAD-421 SS1]	--	--	--	--	--	gi|597979353|ref|XP_007362974.1|	protein DICSQDRAFT_100861 [Dichomitus squalens LYAD-421 SS1] >gi|395331783|gb|EJF64163.1| hypothetical protein DICSQDRAFT_100861 [Dichomitus squalens LYAD-421 SS1]	--	--	--	--	--
GL21873-G	19.6433	89.1867	2.18279	Up	0.872404	gi|597979071|ref|XP_007362902.1|	protein DICSQDRAFT_153214 [Dichomitus squalens LYAD-421 SS1] >gi|395331711|gb|EJF64091.1| hypothetical protein DICSQDRAFT_153214 [Dichomitus squalens LYAD-421 SS1]	maw:MAC_08169	RAS small monomeric GTPase Rab6; K07893 Ras-related protein Rab-6A	--	--	GO:0016020 membrane	gi|597979071|ref|XP_007362902.1|	protein DICSQDRAFT_153214 [Dichomitus squalens LYAD-421 SS1] >gi|395331711|gb|EJF64091.1| hypothetical protein DICSQDRAFT_153214 [Dichomitus squalens LYAD-421 SS1]	maw:MAC_08169	RAS small monomeric GTPase Rab6; K07893 Ras-related protein Rab-6A	--	--	GO:0016020 membrane
GL21876-G	7.92333	38.0567	2.26397	Up	0.815058	gi|636613729|ref|XP_008037999.1|	protein TRAVEDRAFT_121218 [Trametes versicolor FP-101664 SS1] >gi|392566631|gb|EIW59807.1| hypothetical protein TRAVEDRAFT_121218 [Trametes versicolor FP-101664 SS1]	--	--	--	--	--	gi|636613729|ref|XP_008037999.1|	protein TRAVEDRAFT_121218 [Trametes versicolor FP-101664 SS1] >gi|392566631|gb|EIW59807.1| hypothetical protein TRAVEDRAFT_121218 [Trametes versicolor FP-101664 SS1]	--	--	--	--	--
GL21892-G	4.35667	30.2233	2.79437	Up	0.827229	gi|597998579|ref|XP_007367934.1|	protein DICSQDRAFT_162524 [Dichomitus squalens LYAD-421 SS1] >gi|395326947|gb|EJF59351.1| hypothetical protein DICSQDRAFT_162524 [Dichomitus squalens LYAD-421 SS1]	dsq:DICSQDRAFT_162524	hypothetical protein; K15174 RNA polymerase II-associated factor 1	GO:0006368 transcription elongation from RNA polymerase II promoter | GO:0016570 histone modification	--	GO:0016593 Cdc73/Paf1 complex	gi|597998579|ref|XP_007367934.1|	protein DICSQDRAFT_162524 [Dichomitus squalens LYAD-421 SS1] >gi|395326947|gb|EJF59351.1| hypothetical protein DICSQDRAFT_162524 [Dichomitus squalens LYAD-421 SS1]	dsq:DICSQDRAFT_162524	hypothetical protein; K15174 RNA polymerase II-associated factor 1	GO:0006368 transcription elongation from RNA polymerase II promoter | GO:0016570 histone modification	--	GO:0016593 Cdc73/Paf1 complex
GL21898-G	10.5733	44.6467	2.07812	Up	0.81259	gi|597979357|ref|XP_007362975.1|	protein DICSQDRAFT_167340 [Dichomitus squalens LYAD-421 SS1] >gi|395331784|gb|EJF64164.1| hypothetical protein DICSQDRAFT_167340 [Dichomitus squalens LYAD-421 SS1]	--	--	--	--	--	gi|597979357|ref|XP_007362975.1|	protein DICSQDRAFT_167340 [Dichomitus squalens LYAD-421 SS1] >gi|395331784|gb|EJF64164.1| hypothetical protein DICSQDRAFT_167340 [Dichomitus squalens LYAD-421 SS1]	--	--	--	--	--
GL21911-G	20.8167	149.063	2.84011	Up	0.938926	gi|597979319|ref|XP_007362965.1|	protein DICSQDRAFT_54247 [Dichomitus squalens LYAD-421 SS1] >gi|395331774|gb|EJF64154.1| hypothetical protein DICSQDRAFT_54247 [Dichomitus squalens LYAD-421 SS1]	pco:PHACADRAFT_255260	hypothetical protein; K17535 serine/threonine-protein kinase TNNI3K [EC:2.7.11.1]	--	GO:0046872 metal ion binding	--	gi|597979319|ref|XP_007362965.1|	protein DICSQDRAFT_54247 [Dichomitus squalens LYAD-421 SS1] >gi|395331774|gb|EJF64154.1| hypothetical protein DICSQDRAFT_54247 [Dichomitus squalens LYAD-421 SS1]	pco:PHACADRAFT_255260	hypothetical protein; K17535 serine/threonine-protein kinase TNNI3K [EC:2.7.11.1]	--	GO:0046872 metal ion binding	--
GL21912-G	92.21	343.707	1.89818	Up	0.868268	gi|597995211|ref|XP_007367070.1|	dehydrogenase [Dichomitus squalens LYAD-421 SS1] >gi|395327719|gb|EJF60116.1| dihydrolipoyl dehydrogenase [Dichomitus squalens LYAD-421 SS1]	dsq:DICSQDRAFT_137692	dihydrolipoyl dehydrogenase; K00382 dihydrolipoamide dehydrogenase [EC:1.8.1.4]	GO:0045454 cell redox homeostasis | GO:0055114 oxidation-reduction process	GO:0050660 flavin adenine dinucleotide binding | GO:0004148 dihydrolipoyl dehydrogenase activity	GO:0005623 cell	gi|597995211|ref|XP_007367070.1|	dehydrogenase [Dichomitus squalens LYAD-421 SS1] >gi|395327719|gb|EJF60116.1| dihydrolipoyl dehydrogenase [Dichomitus squalens LYAD-421 SS1]	dsq:DICSQDRAFT_137692	dihydrolipoyl dehydrogenase; K00382 dihydrolipoamide dehydrogenase [EC:1.8.1.4]	GO:0045454 cell redox homeostasis | GO:0055114 oxidation-reduction process	GO:0050660 flavin adenine dinucleotide binding | GO:0004148 dihydrolipoyl dehydrogenase activity	GO:0005623 cell
GL21914-G	6.81333	33.4333	2.29485	Up	0.803282	gi|597979287|ref|XP_007362957.1|	ATPase domain-containing protein [Dichomitus squalens LYAD-421 SS1] >gi|395331766|gb|EJF64146.1| actin-like ATPase domain-containing protein [Dichomitus squalens LYAD-421 SS1]	dsq:DICSQDRAFT_167314	actin-like ATPase domain-containing protein; K11768 actin-related protein 9	GO:0006338 chromatin remodeling	--	GO:0016586 RSC complex | GO:0016514 SWI/SNF complex	gi|597979287|ref|XP_007362957.1|	ATPase domain-containing protein [Dichomitus squalens LYAD-421 SS1] >gi|395331766|gb|EJF64146.1| actin-like ATPase domain-containing protein [Dichomitus squalens LYAD-421 SS1]	dsq:DICSQDRAFT_167314	actin-like ATPase domain-containing protein; K11768 actin-related protein 9	GO:0006338 chromatin remodeling	--	GO:0016586 RSC complex | GO:0016514 SWI/SNF complex
GL21919-G	10.4	47.3567	2.18698	Up	0.830235	gi|597979219|ref|XP_007362940.1|	protein DICSQDRAFT_54090, partial [Dichomitus squalens LYAD-421 SS1] >gi|395331749|gb|EJF64129.1| hypothetical protein DICSQDRAFT_54090, partial [Dichomitus squalens LYAD-421 SS1]	bsc:COCSADRAFT_185038	hypothetical protein; K19487 transcription factor SFP1	--	--	--	gi|597979219|ref|XP_007362940.1|	protein DICSQDRAFT_54090, partial [Dichomitus squalens LYAD-421 SS1] >gi|395331749|gb|EJF64129.1| hypothetical protein DICSQDRAFT_54090, partial [Dichomitus squalens LYAD-421 SS1]	bsc:COCSADRAFT_185038	hypothetical protein; K19487 transcription factor SFP1	--	--	--
GL21929-G	13.6	81.1933	2.57775	Up	0.901996	gi|597979179|ref|XP_007362929.1|	[Dichomitus squalens LYAD-421 SS1] >gi|395331738|gb|EJF64118.1| O-mannosyltransferase [Dichomitus squalens LYAD-421 SS1]	dsq:DICSQDRAFT_160013	O-mannosyltransferase; K00728 dolichyl-phosphate-mannose-protein mannosyltransferase [EC:2.4.1.109]	GO:0006493 protein O-linked glycosylation | GO:0097502 mannosylation	GO:0000030 mannosyltransferase activity	GO:0016021 integral component of membrane	gi|597979179|ref|XP_007362929.1|	[Dichomitus squalens LYAD-421 SS1] >gi|395331738|gb|EJF64118.1| O-mannosyltransferase [Dichomitus squalens LYAD-421 SS1]	dsq:DICSQDRAFT_160013	O-mannosyltransferase; K00728 dolichyl-phosphate-mannose-protein mannosyltransferase [EC:2.4.1.109]	GO:0006493 protein O-linked glycosylation | GO:0097502 mannosylation	GO:0000030 mannosyltransferase activity	GO:0016021 integral component of membrane
GL21937-G	3.07333	39.4567	3.68239	Up	0.888933	gi|597978965|ref|XP_007362875.1|	protein DICSQDRAFT_53819 [Dichomitus squalens LYAD-421 SS1] >gi|395331684|gb|EJF64064.1| hypothetical protein DICSQDRAFT_53819 [Dichomitus squalens LYAD-421 SS1]	maj:MAA_09679	DEAD/DEAH box helicase; K13181 ATP-dependent RNA helicase DDX27 [EC:3.6.4.13]	--	--	--	gi|597978965|ref|XP_007362875.1|	protein DICSQDRAFT_53819 [Dichomitus squalens LYAD-421 SS1] >gi|395331684|gb|EJF64064.1| hypothetical protein DICSQDRAFT_53819 [Dichomitus squalens LYAD-421 SS1]	maj:MAA_09679	DEAD/DEAH box helicase; K13181 ATP-dependent RNA helicase DDX27 [EC:3.6.4.13]	--	--	--
GL21938-G	26.5433	96.95	1.86889	Up	0.834292	gi|597979091|ref|XP_007362907.1|	protein DICSQDRAFT_144789 [Dichomitus squalens LYAD-421 SS1] >gi|395331716|gb|EJF64096.1| hypothetical protein DICSQDRAFT_144789 [Dichomitus squalens LYAD-421 SS1]	dsq:DICSQDRAFT_144789	hypothetical protein; K20309 trafficking protein particle complex subunit 12	--	--	--	gi|597979091|ref|XP_007362907.1|	protein DICSQDRAFT_144789 [Dichomitus squalens LYAD-421 SS1] >gi|395331716|gb|EJF64096.1| hypothetical protein DICSQDRAFT_144789 [Dichomitus squalens LYAD-421 SS1]	dsq:DICSQDRAFT_144789	hypothetical protein; K20309 trafficking protein particle complex subunit 12	--	--	--
GL21941-G	34.6367	284.563	3.03838	Up	0.957424	gi|597979043|ref|XP_007362895.1|	protein DICSQDRAFT_153209 [Dichomitus squalens LYAD-421 SS1] >gi|395331704|gb|EJF64084.1| hypothetical protein DICSQDRAFT_153209 [Dichomitus squalens LYAD-421 SS1]	--	--	--	--	--	gi|597979043|ref|XP_007362895.1|	protein DICSQDRAFT_153209 [Dichomitus squalens LYAD-421 SS1] >gi|395331704|gb|EJF64084.1| hypothetical protein DICSQDRAFT_153209 [Dichomitus squalens LYAD-421 SS1]	--	--	--	--	--
GL21945-G	7.92333	68.0233	3.10185	Up	0.917106	gi|597978991|ref|XP_007362882.1|	protein [Dichomitus squalens LYAD-421 SS1] >gi|395331691|gb|EJF64071.1| subtilisin-like protein [Dichomitus squalens LYAD-421 SS1]	dsq:DICSQDRAFT_100668	subtilisin-like protein; K01279 tripeptidyl-peptidase I [EC:3.4.14.9]	GO:0006508 proteolysis	GO:0004252 serine-type endopeptidase activity	--	gi|597978991|ref|XP_007362882.1|	protein [Dichomitus squalens LYAD-421 SS1] >gi|395331691|gb|EJF64071.1| subtilisin-like protein [Dichomitus squalens LYAD-421 SS1]	dsq:DICSQDRAFT_100668	subtilisin-like protein; K01279 tripeptidyl-peptidase I [EC:3.4.14.9]	GO:0006508 proteolysis	GO:0004252 serine-type endopeptidase activity	--
GL21956-G	14.0033	55.0833	1.97585	Up	0.816962	gi|597978799|ref|XP_007362832.1|	protein DICSQDRAFT_100582 [Dichomitus squalens LYAD-421 SS1] >gi|395331641|gb|EJF64021.1| hypothetical protein DICSQDRAFT_100582 [Dichomitus squalens LYAD-421 SS1]	dsq:DICSQDRAFT_100582	hypothetical protein; K19327 anoctamin-10	--	--	GO:0016020 membrane	gi|597978799|ref|XP_007362832.1|	protein DICSQDRAFT_100582 [Dichomitus squalens LYAD-421 SS1] >gi|395331641|gb|EJF64021.1| hypothetical protein DICSQDRAFT_100582 [Dichomitus squalens LYAD-421 SS1]	dsq:DICSQDRAFT_100582	hypothetical protein; K19327 anoctamin-10	--	--	GO:0016020 membrane
GL21972-G	76.5567	247.867	1.69496	Up	0.829132	gi|597998647|ref|XP_007367951.1|	domain-containing protein [Dichomitus squalens LYAD-421 SS1] >gi|395326964|gb|EJF59368.1| CRAL/TRIO domain-containing protein [Dichomitus squalens LYAD-421 SS1]	dsq:DICSQDRAFT_65178	CRAL/TRIO domain-containing protein; K19996 phosphatidylinositol transfer protein SFH5	--	--	--	gi|597998647|ref|XP_007367951.1|	domain-containing protein [Dichomitus squalens LYAD-421 SS1] >gi|395326964|gb|EJF59368.1| CRAL/TRIO domain-containing protein [Dichomitus squalens LYAD-421 SS1]	dsq:DICSQDRAFT_65178	CRAL/TRIO domain-containing protein; K19996 phosphatidylinositol transfer protein SFH5	--	--	--
GL21985-G	542.897	1638.35	1.59349	Up	0.822699	gi|597988343|ref|XP_007365282.1|	GTPase-binding protein [Dichomitus squalens LYAD-421 SS1] >gi|395329641|gb|EJF62027.1| small GTPase-binding protein [Dichomitus squalens LYAD-421 SS1]	dsq:DICSQDRAFT_136147	small GTPase-binding protein; K04513 Ras homolog gene family, member A	GO:0007264 small GTPase mediated signal transduction	GO:0005525 GTP binding	GO:0005622 intracellular | GO:0016020 membrane	gi|597988343|ref|XP_007365282.1|	GTPase-binding protein [Dichomitus squalens LYAD-421 SS1] >gi|395329641|gb|EJF62027.1| small GTPase-binding protein [Dichomitus squalens LYAD-421 SS1]	dsq:DICSQDRAFT_136147	small GTPase-binding protein; K04513 Ras homolog gene family, member A	GO:0007264 small GTPase mediated signal transduction	GO:0005525 GTP binding	GO:0005622 intracellular | GO:0016020 membrane
GL21989-G	188.79	33.8433	-2.47984	Down	0.923001	gi|630358027|ref|XP_007868314.1|	B-like lectin [Gloeophyllum trabeum ATCC 11539] >gi|521722637|gb|EPQ52998.1| ricin B-like lectin [Gloeophyllum trabeum ATCC 11539]	--	--	--	--	--	gi|630358027|ref|XP_007868314.1|	B-like lectin [Gloeophyllum trabeum ATCC 11539] >gi|521722637|gb|EPQ52998.1| ricin B-like lectin [Gloeophyllum trabeum ATCC 11539]	--	--	--	--	--
GL22007-G	2.11667	31.19	3.88122	Up	0.866457	gi|597987905|ref|XP_007365169.1|	family 15 protein [Dichomitus squalens LYAD-421 SS1] >gi|395329528|gb|EJF61914.1| glycosyltransferase family 15 protein [Dichomitus squalens LYAD-421 SS1]	dsq:DICSQDRAFT_105020	glycosyltransferase family 15 protein; K10967 alpha 1,2-mannosyltransferase [EC:2.4.1.-]	GO:0097502 mannosylation | GO:0006486 protein glycosylation	GO:0000030 mannosyltransferase activity	GO:0016020 membrane	gi|597987905|ref|XP_007365169.1|	family 15 protein [Dichomitus squalens LYAD-421 SS1] >gi|395329528|gb|EJF61914.1| glycosyltransferase family 15 protein [Dichomitus squalens LYAD-421 SS1]	dsq:DICSQDRAFT_105020	glycosyltransferase family 15 protein; K10967 alpha 1,2-mannosyltransferase [EC:2.4.1.-]	GO:0097502 mannosylation | GO:0006486 protein glycosylation	GO:0000030 mannosyltransferase activity	GO:0016020 membrane
GL22009-G	10.27	80.7	2.97413	Up	0.920782	gi|636626013|ref|XP_008044141.1|	protein TRAVEDRAFT_52979 [Trametes versicolor FP-101664 SS1] >gi|392559351|gb|EIW52535.1| hypothetical protein TRAVEDRAFT_52979 [Trametes versicolor FP-101664 SS1]	--	--	--	--	--	gi|636626013|ref|XP_008044141.1|	protein TRAVEDRAFT_52979 [Trametes versicolor FP-101664 SS1] >gi|392559351|gb|EIW52535.1| hypothetical protein TRAVEDRAFT_52979 [Trametes versicolor FP-101664 SS1]	--	--	--	--	--
GL22027-G	10.2367	59.1867	2.53153	Up	0.87801	gi|597988267|ref|XP_007365263.1|	general substrate transporter [Dichomitus squalens LYAD-421 SS1] >gi|395329622|gb|EJF62008.1| MFS general substrate transporter [Dichomitus squalens LYAD-421 SS1]	dsq:DICSQDRAFT_154854	MFS general substrate transporter; K06902 MFS transporter, UMF1 family	--	--	GO:0016021 integral component of membrane	gi|597988267|ref|XP_007365263.1|	general substrate transporter [Dichomitus squalens LYAD-421 SS1] >gi|395329622|gb|EJF62008.1| MFS general substrate transporter [Dichomitus squalens LYAD-421 SS1]	dsq:DICSQDRAFT_154854	MFS general substrate transporter; K06902 MFS transporter, UMF1 family	--	--	GO:0016021 integral component of membrane
GL22029-G	11.1667	57.7733	2.37121	Up	0.863752	gi|597987801|ref|XP_007365142.1|	protein DICSQDRAFT_104978 [Dichomitus squalens LYAD-421 SS1] >gi|395329501|gb|EJF61887.1| hypothetical protein DICSQDRAFT_104978 [Dichomitus squalens LYAD-421 SS1]	dsq:DICSQDRAFT_104978	hypothetical protein; K00921 1-phosphatidylinositol-3-phosphate 5-kinase [EC:2.7.1.150]	GO:0046854 phosphatidylinositol phosphorylation	GO:0016307 phosphatidylinositol phosphate kinase activity	--	gi|597987801|ref|XP_007365142.1|	protein DICSQDRAFT_104978 [Dichomitus squalens LYAD-421 SS1] >gi|395329501|gb|EJF61887.1| hypothetical protein DICSQDRAFT_104978 [Dichomitus squalens LYAD-421 SS1]	dsq:DICSQDRAFT_104978	hypothetical protein; K00921 1-phosphatidylinositol-3-phosphate 5-kinase [EC:2.7.1.150]	GO:0046854 phosphatidylinositol phosphorylation	GO:0016307 phosphatidylinositol phosphate kinase activity	--
GL22047-G	711.91	93.81	-2.92388	Down	0.960273	gi|630358027|ref|XP_007868314.1|	B-like lectin [Gloeophyllum trabeum ATCC 11539] >gi|521722637|gb|EPQ52998.1| ricin B-like lectin [Gloeophyllum trabeum ATCC 11539]	--	--	--	--	--	gi|630358027|ref|XP_007868314.1|	B-like lectin [Gloeophyllum trabeum ATCC 11539] >gi|521722637|gb|EPQ52998.1| ricin B-like lectin [Gloeophyllum trabeum ATCC 11539]	--	--	--	--	--
GL22056-G	52.87	363.66	2.78207	Up	0.949547	gi|597987901|ref|XP_007365168.1|	protein DICSQDRAFT_136040 [Dichomitus squalens LYAD-421 SS1] >gi|395329527|gb|EJF61913.1| hypothetical protein DICSQDRAFT_136040 [Dichomitus squalens LYAD-421 SS1]	scm:SCHCODRAFT_233125	hypothetical protein; K03006 DNA-directed RNA polymerase II subunit RPB1 [EC:2.7.7.6]	--	--	--	gi|597987901|ref|XP_007365168.1|	protein DICSQDRAFT_136040 [Dichomitus squalens LYAD-421 SS1] >gi|395329527|gb|EJF61913.1| hypothetical protein DICSQDRAFT_136040 [Dichomitus squalens LYAD-421 SS1]	scm:SCHCODRAFT_233125	hypothetical protein; K03006 DNA-directed RNA polymerase II subunit RPB1 [EC:2.7.7.6]	--	--	--
GL22074-G	87.4067	261.68	1.58199	Up	0.808179	gi|691790491|emb|CDO73854.1|	protein BN946_scf185016.g11 [Trametes cinnabarina]	dsq:DICSQDRAFT_146794	hypothetical protein; K17422 large subunit ribosomal protein L41	--	--	--	gi|691790491|emb|CDO73854.1|	protein BN946_scf185016.g11 [Trametes cinnabarina]	dsq:DICSQDRAFT_146794	hypothetical protein; K17422 large subunit ribosomal protein L41	--	--	--
GL22107-G	147.257	674.75	2.19602	Up	0.912669	--	--	--	--	--	--	--	--	--	--	--	--	--	--
GL22134-G	2.22	29.8933	3.75119	Up	0.858803	gi|598008383|ref|XP_007370535.1|	protein DICSQDRAFT_141018 [Dichomitus squalens LYAD-421 SS1] >gi|395324319|gb|EJF56762.1| hypothetical protein DICSQDRAFT_141018 [Dichomitus squalens LYAD-421 SS1]	--	--	--	--	--	gi|598008383|ref|XP_007370535.1|	protein DICSQDRAFT_141018 [Dichomitus squalens LYAD-421 SS1] >gi|395324319|gb|EJF56762.1| hypothetical protein DICSQDRAFT_141018 [Dichomitus squalens LYAD-421 SS1]	--	--	--	--	--
GL22138-G	44.98	140.223	1.64037	Up	0.808271	gi|598008213|ref|XP_007370498.1|	initiation factor 3, RNA-binding subunit [Dichomitus squalens LYAD-421 SS1] >gi|395324282|gb|EJF56725.1| translation initiation factor 3, RNA-binding subunit [Dichomitus squalens LYAD-421 SS1]	dsq:DICSQDRAFT_129901	translation initiation factor 3, RNA-binding subunit; K03248 translation initiation factor 3 subunit G	GO:0001731 formation of translation preinitiation complex | GO:0006446 regulation of translational initiation	GO:0003743 translation initiation factor activity | GO:0000166 nucleotide binding	GO:0016282 eukaryotic 43S preinitiation complex | GO:0005852 eukaryotic translation initiation factor 3 complex | GO:0033290 eukaryotic 48S preinitiation complex	gi|598008213|ref|XP_007370498.1|	initiation factor 3, RNA-binding subunit [Dichomitus squalens LYAD-421 SS1] >gi|395324282|gb|EJF56725.1| translation initiation factor 3, RNA-binding subunit [Dichomitus squalens LYAD-421 SS1]	dsq:DICSQDRAFT_129901	translation initiation factor 3, RNA-binding subunit; K03248 translation initiation factor 3 subunit G	GO:0001731 formation of translation preinitiation complex | GO:0006446 regulation of translational initiation	GO:0003743 translation initiation factor activity | GO:0000166 nucleotide binding	GO:0016282 eukaryotic 43S preinitiation complex | GO:0005852 eukaryotic translation initiation factor 3 complex | GO:0033290 eukaryotic 48S preinitiation complex
GL22149-G	95.48	16.91	-2.49732	Down	0.903413	gi|636620671|ref|XP_008041470.1|	ribosomal protein L17/L23 [Trametes versicolor FP-101664 SS1] >gi|392562665|gb|EIW55845.1| 60S ribosomal protein L17/L23 [Trametes versicolor FP-101664 SS1]	dsq:DICSQDRAFT_102171	60S ribosomal protein L17/L23; K02894 large subunit ribosomal protein L23e	GO:0006412 translation	GO:0003735 structural constituent of ribosome	GO:0005840 ribosome	gi|636620671|ref|XP_008041470.1|	ribosomal protein L17/L23 [Trametes versicolor FP-101664 SS1] >gi|392562665|gb|EIW55845.1| 60S ribosomal protein L17/L23 [Trametes versicolor FP-101664 SS1]	dsq:DICSQDRAFT_102171	60S ribosomal protein L17/L23; K02894 large subunit ribosomal protein L23e	GO:0006412 translation	GO:0003735 structural constituent of ribosome	GO:0005840 ribosome
GL22164-G	21.1467	449.82	4.41085	Up	0.985598	gi|597981139|ref|XP_007363431.1|	protein DICSQDRAFT_82029 [Dichomitus squalens LYAD-421 SS1] >gi|395331332|gb|EJF63713.1| hypothetical protein DICSQDRAFT_82029 [Dichomitus squalens LYAD-421 SS1]	abv:AGABI2DRAFT180834	AGABI2DRAFT_180834; hypothetical protein; K02183 calmodulin	--	--	--	gi|597981139|ref|XP_007363431.1|	protein DICSQDRAFT_82029 [Dichomitus squalens LYAD-421 SS1] >gi|395331332|gb|EJF63713.1| hypothetical protein DICSQDRAFT_82029 [Dichomitus squalens LYAD-421 SS1]	abv:AGABI2DRAFT180834	AGABI2DRAFT_180834; hypothetical protein; K02183 calmodulin	--	--	--
GL22171-G	11.5333	81.7367	2.82517	Up	0.915531	gi|597981231|ref|XP_007363456.1|	protein DICSQDRAFT_134340 [Dichomitus squalens LYAD-421 SS1] >gi|395331357|gb|EJF63738.1| hypothetical protein DICSQDRAFT_134340 [Dichomitus squalens LYAD-421 SS1]	--	--	--	--	--	gi|597981231|ref|XP_007363456.1|	protein DICSQDRAFT_134340 [Dichomitus squalens LYAD-421 SS1] >gi|395331357|gb|EJF63738.1| hypothetical protein DICSQDRAFT_134340 [Dichomitus squalens LYAD-421 SS1]	--	--	--	--	--
GL22179-G	44.7067	146.557	1.7129	Up	0.822318	gi|597981339|ref|XP_007363483.1|	protein DICSQDRAFT_160294 [Dichomitus squalens LYAD-421 SS1] >gi|395331384|gb|EJF63765.1| hypothetical protein DICSQDRAFT_160294 [Dichomitus squalens LYAD-421 SS1]	--	--	--	--	--	gi|597981339|ref|XP_007363483.1|	protein DICSQDRAFT_160294 [Dichomitus squalens LYAD-421 SS1] >gi|395331384|gb|EJF63765.1| hypothetical protein DICSQDRAFT_160294 [Dichomitus squalens LYAD-421 SS1]	--	--	--	--	--
GL22186-G	12.32	57.46	2.22156	Up	0.849705	gi|598008317|ref|XP_007370519.1|	transporter [Dichomitus squalens LYAD-421 SS1] >gi|395324303|gb|EJF56746.1| ammonium transporter [Dichomitus squalens LYAD-421 SS1]	dsq:DICSQDRAFT_112666	ammonium transporter; K03320 ammonium transporter, Amt family	GO:0072488 ammonium transmembrane transport	GO:0008519 ammonium transmembrane transporter activity	GO:0016021 integral component of membrane	gi|598008317|ref|XP_007370519.1|	transporter [Dichomitus squalens LYAD-421 SS1] >gi|395324303|gb|EJF56746.1| ammonium transporter [Dichomitus squalens LYAD-421 SS1]	dsq:DICSQDRAFT_112666	ammonium transporter; K03320 ammonium transporter, Amt family	GO:0072488 ammonium transmembrane transport	GO:0008519 ammonium transmembrane transporter activity	GO:0016021 integral component of membrane
GL22189-G	757.24	184.503	-2.0371	Down	0.895221	gi|597982103|ref|XP_007363680.1|	[Dichomitus squalens LYAD-421 SS1] >gi|395331581|gb|EJF63962.1| catalase [Dichomitus squalens LYAD-421 SS1]	dsq:DICSQDRAFT_82531	catalase; K03781 catalase [EC:1.11.1.6]	GO:0098869 cellular oxidant detoxification | GO:0006979 response to oxidative stress | GO:0042744 hydrogen peroxide catabolic process | GO:0055114 oxidation-reduction process	GO:0046872 metal ion binding | GO:0020037 heme binding | GO:0004096 catalase activity	--	gi|597982103|ref|XP_007363680.1|	[Dichomitus squalens LYAD-421 SS1] >gi|395331581|gb|EJF63962.1| catalase [Dichomitus squalens LYAD-421 SS1]	dsq:DICSQDRAFT_82531	catalase; K03781 catalase [EC:1.11.1.6]	GO:0098869 cellular oxidant detoxification | GO:0006979 response to oxidative stress | GO:0042744 hydrogen peroxide catabolic process | GO:0055114 oxidation-reduction process	GO:0046872 metal ion binding | GO:0020037 heme binding | GO:0004096 catalase activity	--
GL22204-G	32.96	309.92	3.23311	Up	0.964881	gi|527303994|gb|EPT04770.1|	protein FOMPIDRAFT_1139630 [Fomitopsis pinicola FP-58527 SS1]	dsq:DICSQDRAFT_134294	hypothetical protein; K00621 glucosamine-phosphate N-acetyltransferase [EC:2.3.1.4]	GO:0008152 metabolic process	GO:0008080 N-acetyltransferase activity	--	gi|527303994|gb|EPT04770.1|	protein FOMPIDRAFT_1139630 [Fomitopsis pinicola FP-58527 SS1]	dsq:DICSQDRAFT_134294	hypothetical protein; K00621 glucosamine-phosphate N-acetyltransferase [EC:2.3.1.4]	GO:0008152 metabolic process	GO:0008080 N-acetyltransferase activity	--
GL22208-G	17.2533	113.737	2.72075	Up	0.924892	gi|636620549|ref|XP_008041409.1|	protein TRAVEDRAFT_59954 [Trametes versicolor FP-101664 SS1] >gi|392562539|gb|EIW55719.1| hypothetical protein TRAVEDRAFT_59954 [Trametes versicolor FP-101664 SS1]	--	--	--	--	--	gi|636620549|ref|XP_008041409.1|	protein TRAVEDRAFT_59954 [Trametes versicolor FP-101664 SS1] >gi|392562539|gb|EIW55719.1| hypothetical protein TRAVEDRAFT_59954 [Trametes versicolor FP-101664 SS1]	--	--	--	--	--
GL22215-G	275.887	73.9433	-1.89958	Down	0.865603	gi|597981117|ref|XP_007363426.1|	hydrophobin [Dichomitus squalens LYAD-421 SS1] >gi|395331327|gb|EJF63708.1| fungal hydrophobin [Dichomitus squalens LYAD-421 SS1]	psq:PUNSTDRAFT_125108	PP2C-domain-containing protein; K19704 protein phosphatase PTC1 [EC:3.1.3.16]	--	--	--	gi|597981117|ref|XP_007363426.1|	hydrophobin [Dichomitus squalens LYAD-421 SS1] >gi|395331327|gb|EJF63708.1| fungal hydrophobin [Dichomitus squalens LYAD-421 SS1]	psq:PUNSTDRAFT_125108	PP2C-domain-containing protein; K19704 protein phosphatase PTC1 [EC:3.1.3.16]	--	--	--
GL22217-G	243.593	746.153	1.615	Up	0.823789	gi|317383396|gb|ADV17372.1|	[Ganoderma lucidum]	ela:UCREL1_5566	putative calmodulin protein; K02183 calmodulin	GO:0006468 protein phosphorylation	GO:0004689 phosphorylase kinase activity | GO:0005509 calcium ion binding	--	gi|317383396|gb|ADV17372.1|	[Ganoderma lucidum]	ela:UCREL1_5566	putative calmodulin protein; K02183 calmodulin	GO:0006468 protein phosphorylation	GO:0004689 phosphorylase kinase activity | GO:0005509 calcium ion binding	--
GL22233-G	16.0633	59.44	1.88766	Up	0.80919	gi|598007499|ref|XP_007370244.1|	mRNA decapping enzyme [Dichomitus squalens LYAD-421 SS1] >gi|395324533|gb|EJF56971.1| scavenger mRNA decapping enzyme [Dichomitus squalens LYAD-421 SS1]	dsq:DICSQDRAFT_112292	scavenger mRNA decapping enzyme; K12584 m7GpppX diphosphatase [EC:3.6.1.59]	GO:0000290 deadenylation-dependent decapping of nuclear-transcribed mRNA	GO:0016787 hydrolase activity	--	gi|598007499|ref|XP_007370244.1|	mRNA decapping enzyme [Dichomitus squalens LYAD-421 SS1] >gi|395324533|gb|EJF56971.1| scavenger mRNA decapping enzyme [Dichomitus squalens LYAD-421 SS1]	dsq:DICSQDRAFT_112292	scavenger mRNA decapping enzyme; K12584 m7GpppX diphosphatase [EC:3.6.1.59]	GO:0000290 deadenylation-dependent decapping of nuclear-transcribed mRNA	GO:0016787 hydrolase activity	--
GL22236-G	11.87	62.0367	2.3858	Up	0.870631	gi|597999993|ref|XP_007368309.1|	protein DICSQDRAFT_65891 [Dichomitus squalens LYAD-421 SS1] >gi|395326598|gb|EJF59006.1| hypothetical protein DICSQDRAFT_65891 [Dichomitus squalens LYAD-421 SS1]	--	--	--	--	GO:0016020 membrane	gi|597999993|ref|XP_007368309.1|	protein DICSQDRAFT_65891 [Dichomitus squalens LYAD-421 SS1] >gi|395326598|gb|EJF59006.1| hypothetical protein DICSQDRAFT_65891 [Dichomitus squalens LYAD-421 SS1]	--	--	--	--	GO:0016020 membrane
GL22260-G	12.3667	61.19	2.30684	Up	0.8624	gi|597982013|ref|XP_007363656.1|	protein DICSQDRAFT_167985 [Dichomitus squalens LYAD-421 SS1] >gi|395331557|gb|EJF63938.1| hypothetical protein DICSQDRAFT_167985 [Dichomitus squalens LYAD-421 SS1]	--	--	--	--	--	gi|597982013|ref|XP_007363656.1|	protein DICSQDRAFT_167985 [Dichomitus squalens LYAD-421 SS1] >gi|395331557|gb|EJF63938.1| hypothetical protein DICSQDRAFT_167985 [Dichomitus squalens LYAD-421 SS1]	--	--	--	--	--
GL22261-G	84.15	247.79	1.55808	Up	0.802061	gi|636619659|ref|XP_008040964.1|	protein [Trametes versicolor FP-101664 SS1] >gi|392562596|gb|EIW55776.1| APG12-domain-containing protein [Trametes versicolor FP-101664 SS1]	pco:PHACADRAFT_147683	hypothetical protein; K08336 ubiquitin-like protein ATG12	GO:0000045 autophagosome assembly | GO:0015031 protein transport	--	GO:0034045 pre-autophagosomal structure membrane	gi|636619659|ref|XP_008040964.1|	protein [Trametes versicolor FP-101664 SS1] >gi|392562596|gb|EIW55776.1| APG12-domain-containing protein [Trametes versicolor FP-101664 SS1]	pco:PHACADRAFT_147683	hypothetical protein; K08336 ubiquitin-like protein ATG12	GO:0000045 autophagosome assembly | GO:0015031 protein transport	--	GO:0034045 pre-autophagosomal structure membrane
GL22262-G	22.3333	82.3233	1.8821	Up	0.828896	gi|597981973|ref|XP_007363646.1|	dehydrogenase complex E1 component mitochondrial precursor [Dichomitus squalens LYAD-421 SS1] >gi|395331547|gb|EJF63928.1| 2-oxoglutarate dehydrogenase complex E1 component mitochondrial precursor [Dichomitus squalens LYAD-421 SS1]	dsq:DICSQDRAFT_82471	2-oxoglutarate dehydrogenase complex E1 component mitochondrial precursor; K00164 2-oxoglutarate dehydrogenase E1 component [EC:1.2.4.2]	GO:0006099 tricarboxylic acid cycle	GO:0004591 oxoglutarate dehydrogenase (succinyl-transferring) activity | GO:0030976 thiamine pyrophosphate binding	--	gi|597981973|ref|XP_007363646.1|	dehydrogenase complex E1 component mitochondrial precursor [Dichomitus squalens LYAD-421 SS1] >gi|395331547|gb|EJF63928.1| 2-oxoglutarate dehydrogenase complex E1 component mitochondrial precursor [Dichomitus squalens LYAD-421 SS1]	dsq:DICSQDRAFT_82471	2-oxoglutarate dehydrogenase complex E1 component mitochondrial precursor; K00164 2-oxoglutarate dehydrogenase E1 component [EC:1.2.4.2]	GO:0006099 tricarboxylic acid cycle	GO:0004591 oxoglutarate dehydrogenase (succinyl-transferring) activity | GO:0030976 thiamine pyrophosphate binding	--
GL22267-G	36.1833	227.78	2.65424	Up	0.937259	gi|597981985|ref|XP_007363649.1|	protein DICSQDRAFT_134523 [Dichomitus squalens LYAD-421 SS1] >gi|395331550|gb|EJF63931.1| hypothetical protein DICSQDRAFT_134523 [Dichomitus squalens LYAD-421 SS1]	--	--	--	--	GO:0016020 membrane	gi|597981985|ref|XP_007363649.1|	protein DICSQDRAFT_134523 [Dichomitus squalens LYAD-421 SS1] >gi|395331550|gb|EJF63931.1| hypothetical protein DICSQDRAFT_134523 [Dichomitus squalens LYAD-421 SS1]	--	--	--	--	GO:0016020 membrane
GL22276-G	318.64	104.447	-1.60916	Down	0.816581	gi|597980891|ref|XP_007363369.1|	I glutamine amidotransferase-like protein [Dichomitus squalens LYAD-421 SS1] >gi|395331270|gb|EJF63651.1| class I glutamine amidotransferase-like protein [Dichomitus squalens LYAD-421 SS1]	afm:AFUA_4G03700	GMP synthase; K01951 GMP synthase (glutamine-hydrolysing) [EC:6.3.5.2]	--	--	--	gi|597980891|ref|XP_007363369.1|	I glutamine amidotransferase-like protein [Dichomitus squalens LYAD-421 SS1] >gi|395331270|gb|EJF63651.1| class I glutamine amidotransferase-like protein [Dichomitus squalens LYAD-421 SS1]	afm:AFUA_4G03700	GMP synthase; K01951 GMP synthase (glutamine-hydrolysing) [EC:6.3.5.2]	--	--	--
GL22282-G	44.58	151.98	1.76941	Up	0.83416	gi|597980957|ref|XP_007363386.1|	membrane protein [Dichomitus squalens LYAD-421 SS1] >gi|395331287|gb|EJF63668.1| vesicle-associated membrane protein [Dichomitus squalens LYAD-421 SS1]	dsq:DICSQDRAFT_101584	vesicle-associated membrane protein; K08515 vesicle-associated membrane protein 7	GO:0016192 vesicle-mediated transport	--	GO:0016021 integral component of membrane	gi|597980957|ref|XP_007363386.1|	membrane protein [Dichomitus squalens LYAD-421 SS1] >gi|395331287|gb|EJF63668.1| vesicle-associated membrane protein [Dichomitus squalens LYAD-421 SS1]	dsq:DICSQDRAFT_101584	vesicle-associated membrane protein; K08515 vesicle-associated membrane protein 7	GO:0016192 vesicle-mediated transport	--	GO:0016021 integral component of membrane
GL22292-G	90.4767	11.4767	-2.95804	Down	0.925981	gi|597981093|ref|XP_007363420.1|	hydrophobin [Dichomitus squalens LYAD-421 SS1] >gi|395331321|gb|EJF63702.1| fungal hydrophobin [Dichomitus squalens LYAD-421 SS1]	psq:PUNSTDRAFT_125108	PP2C-domain-containing protein; K19704 protein phosphatase PTC1 [EC:3.1.3.16]	--	GO:0005199 structural constituent of cell wall	GO:0009277 fungal-type cell wall	gi|597981093|ref|XP_007363420.1|	hydrophobin [Dichomitus squalens LYAD-421 SS1] >gi|395331321|gb|EJF63702.1| fungal hydrophobin [Dichomitus squalens LYAD-421 SS1]	psq:PUNSTDRAFT_125108	PP2C-domain-containing protein; K19704 protein phosphatase PTC1 [EC:3.1.3.16]	--	GO:0005199 structural constituent of cell wall	GO:0009277 fungal-type cell wall
GL22298-G	20.1233	73.8633	1.87599	Up	0.822424	gi|597981311|ref|XP_007363476.1|	protein DICSQDRAFT_145236 [Dichomitus squalens LYAD-421 SS1] >gi|395331377|gb|EJF63758.1| hypothetical protein DICSQDRAFT_145236 [Dichomitus squalens LYAD-421 SS1]	--	--	--	--	--	gi|597981311|ref|XP_007363476.1|	protein DICSQDRAFT_145236 [Dichomitus squalens LYAD-421 SS1] >gi|395331377|gb|EJF63758.1| hypothetical protein DICSQDRAFT_145236 [Dichomitus squalens LYAD-421 SS1]	--	--	--	--	--
GL22300-G	26.7333	91.4467	1.77429	Up	0.815689	gi|597981251|ref|XP_007363461.1|	protein DICSQDRAFT_82093 [Dichomitus squalens LYAD-421 SS1] >gi|395331362|gb|EJF63743.1| hypothetical protein DICSQDRAFT_82093 [Dichomitus squalens LYAD-421 SS1]	--	--	--	--	--	gi|597981251|ref|XP_007363461.1|	protein DICSQDRAFT_82093 [Dichomitus squalens LYAD-421 SS1] >gi|395331362|gb|EJF63743.1| hypothetical protein DICSQDRAFT_82093 [Dichomitus squalens LYAD-421 SS1]	--	--	--	--	--
GL22304-G	8.41333	49.94	2.56945	Up	0.867494	gi|695574511|ref|XP_009551849.1|	protein HETIRDRAFT_38202 [Heterobasidion irregulare TC 32-1] >gi|575060462|gb|ETW76083.1| hypothetical protein HETIRDRAFT_38202 [Heterobasidion irregulare TC 32-1]	hir:HETIRDRAFT_38202	hypothetical protein; K03123 transcription initiation factor TFIIA small subunit	GO:0006367 transcription initiation from RNA polymerase II promoter | GO:0006355 regulation of transcription, DNA-templated	--	GO:0005672 transcription factor TFIIA complex	gi|695574511|ref|XP_009551849.1|	protein HETIRDRAFT_38202 [Heterobasidion irregulare TC 32-1] >gi|575060462|gb|ETW76083.1| hypothetical protein HETIRDRAFT_38202 [Heterobasidion irregulare TC 32-1]	hir:HETIRDRAFT_38202	hypothetical protein; K03123 transcription initiation factor TFIIA small subunit	GO:0006367 transcription initiation from RNA polymerase II promoter | GO:0006355 regulation of transcription, DNA-templated	--	GO:0005672 transcription factor TFIIA complex
GL22318-G	94.2033	16.82	-2.4856	Down	0.902074	gi|598002335|ref|XP_007368911.1|	protein S6e [Dichomitus squalens LYAD-421 SS1] >gi|395325961|gb|EJF58376.1| ribosomal protein S6e [Dichomitus squalens LYAD-421 SS1]	dsq:DICSQDRAFT_110328	ribosomal protein S6e; K02991 small subunit ribosomal protein S6e	GO:0006412 translation	GO:0003735 structural constituent of ribosome	GO:0005840 ribosome	gi|598002335|ref|XP_007368911.1|	protein S6e [Dichomitus squalens LYAD-421 SS1] >gi|395325961|gb|EJF58376.1| ribosomal protein S6e [Dichomitus squalens LYAD-421 SS1]	dsq:DICSQDRAFT_110328	ribosomal protein S6e; K02991 small subunit ribosomal protein S6e	GO:0006412 translation	GO:0003735 structural constituent of ribosome	GO:0005840 ribosome
GL22341-G	12.4733	57.1	2.19464	Up	0.846015	gi|636621751|ref|XP_008042010.1|	protein TRAVEDRAFT_51171 [Trametes versicolor FP-101664 SS1] >gi|392561862|gb|EIW55043.1| hypothetical protein TRAVEDRAFT_51171 [Trametes versicolor FP-101664 SS1]	--	--	--	--	--	gi|636621751|ref|XP_008042010.1|	protein TRAVEDRAFT_51171 [Trametes versicolor FP-101664 SS1] >gi|392561862|gb|EIW55043.1| hypothetical protein TRAVEDRAFT_51171 [Trametes versicolor FP-101664 SS1]	--	--	--	--	--
GL22346-G	85.6533	7.51	-3.51162	Down	0.940305	--	--	--	--	--	--	--	--	--	--	--	--	--	--
GL22349-G	22.8833	80.8367	1.82071	Up	0.817527	gi|636607625|ref|XP_008034947.1|	protein TRAVEDRAFT_35626 [Trametes versicolor FP-101664 SS1] >gi|392569087|gb|EIW62261.1| hypothetical protein TRAVEDRAFT_35626 [Trametes versicolor FP-101664 SS1]	mpr:MPER_09133	hypothetical protein ; K14854 ribosome assembly protein 3	--	--	--	gi|636607625|ref|XP_008034947.1|	protein TRAVEDRAFT_35626 [Trametes versicolor FP-101664 SS1] >gi|392569087|gb|EIW62261.1| hypothetical protein TRAVEDRAFT_35626 [Trametes versicolor FP-101664 SS1]	mpr:MPER_09133	hypothetical protein ; K14854 ribosome assembly protein 3	--	--	--
GL22361-G	1260.13	291.83	-2.11038	Down	0.905475	gi|598000253|ref|XP_007368379.1|	endoglucanase [Dichomitus squalens LYAD-421 SS1] >gi|395326498|gb|EJF58907.1| barwin-like endoglucanase [Dichomitus squalens LYAD-421 SS1]	cci:CC1G_01597	DNA polymerase lambda; K03512 DNA polymerase lambda [EC:2.7.7.7 4.2.99.-]	--	--	--	gi|598000253|ref|XP_007368379.1|	endoglucanase [Dichomitus squalens LYAD-421 SS1] >gi|395326498|gb|EJF58907.1| barwin-like endoglucanase [Dichomitus squalens LYAD-421 SS1]	cci:CC1G_01597	DNA polymerase lambda; K03512 DNA polymerase lambda [EC:2.7.7.7 4.2.99.-]	--	--	--
GL22368-G	67.7	268.44	1.98737	Up	0.879086	gi|598000361|ref|XP_007368406.1|	oxidoreductase [Dichomitus squalens LYAD-421 SS1] >gi|395326525|gb|EJF58934.1| GMC oxidoreductase [Dichomitus squalens LYAD-421 SS1]	ppl:POSPLDRAFT_49652	hypothetical GMC oxidoreductase; K00108 choline dehydrogenase [EC:1.1.99.1]	GO:0055114 oxidation-reduction process	GO:0050660 flavin adenine dinucleotide binding | GO:0016614 oxidoreductase activity, acting on CH-OH group of donors	--	gi|598000361|ref|XP_007368406.1|	oxidoreductase [Dichomitus squalens LYAD-421 SS1] >gi|395326525|gb|EJF58934.1| GMC oxidoreductase [Dichomitus squalens LYAD-421 SS1]	ppl:POSPLDRAFT_49652	hypothetical GMC oxidoreductase; K00108 choline dehydrogenase [EC:1.1.99.1]	GO:0055114 oxidation-reduction process	GO:0050660 flavin adenine dinucleotide binding | GO:0016614 oxidoreductase activity, acting on CH-OH group of donors	--
GL22372-G	9.21667	68.7467	2.89897	Up	0.90961	gi|691795820|emb|CDO69412.1|	protein BN946_scf184791.g7 [Trametes cinnabarina]	scm:SCHCODRAFT_47868	hypothetical protein; K15117 solute carrier family 25, member 34/35	GO:0006810 transport	--	GO:0016021 integral component of membrane	gi|691795820|emb|CDO69412.1|	protein BN946_scf184791.g7 [Trametes cinnabarina]	scm:SCHCODRAFT_47868	hypothetical protein; K15117 solute carrier family 25, member 34/35	GO:0006810 transport	--	GO:0016021 integral component of membrane
GL22416-G	200.21	59.3667	-1.75379	Down	0.836681	gi|598007961|ref|XP_007370453.1|	protein DICSQDRAFT_183583 [Dichomitus squalens LYAD-421 SS1] >gi|395324331|gb|EJF56773.1| hypothetical protein DICSQDRAFT_183583 [Dichomitus squalens LYAD-421 SS1]	--	--	--	--	--	gi|598007961|ref|XP_007370453.1|	protein DICSQDRAFT_183583 [Dichomitus squalens LYAD-421 SS1] >gi|395324331|gb|EJF56773.1| hypothetical protein DICSQDRAFT_183583 [Dichomitus squalens LYAD-421 SS1]	--	--	--	--	--
GL22420-G	37.9967	247.45	2.70319	Up	0.941158	gi|597993507|ref|XP_007366635.1|	protease [Dichomitus squalens LYAD-421 SS1] >gi|395328102|gb|EJF60496.1| acid protease [Dichomitus squalens LYAD-421 SS1]	hir:HETIRDRAFT_39297	aspartic peptidase; K08245 phytepsin [EC:3.4.23.40]	GO:0006508 proteolysis	GO:0004190 aspartic-type endopeptidase activity	--	gi|597993507|ref|XP_007366635.1|	protease [Dichomitus squalens LYAD-421 SS1] >gi|395328102|gb|EJF60496.1| acid protease [Dichomitus squalens LYAD-421 SS1]	hir:HETIRDRAFT_39297	aspartic peptidase; K08245 phytepsin [EC:3.4.23.40]	GO:0006508 proteolysis	GO:0004190 aspartic-type endopeptidase activity	--
GL22434-G	6.98333	54.3633	2.96065	Up	0.895221	gi|597993667|ref|XP_007366676.1|	C-terminal domain-like protein [Dichomitus squalens LYAD-421 SS1] >gi|395328143|gb|EJF60537.1| enolase C-terminal domain-like protein [Dichomitus squalens LYAD-421 SS1]	dsq:DICSQDRAFT_107267	enolase C-terminal domain-like protein; K01684 galactonate dehydratase [EC:4.2.1.6]	GO:0009063 cellular amino acid catabolic process	GO:0003824 catalytic activity	--	gi|597993667|ref|XP_007366676.1|	C-terminal domain-like protein [Dichomitus squalens LYAD-421 SS1] >gi|395328143|gb|EJF60537.1| enolase C-terminal domain-like protein [Dichomitus squalens LYAD-421 SS1]	dsq:DICSQDRAFT_107267	enolase C-terminal domain-like protein; K01684 galactonate dehydratase [EC:4.2.1.6]	GO:0009063 cellular amino acid catabolic process	GO:0003824 catalytic activity	--
GL22437-G	0	61.78	6.94907	Up	0.944913	gi|597993679|ref|XP_007366679.1|	domain-containing protein [Dichomitus squalens LYAD-421 SS1] >gi|395328146|gb|EJF60540.1| SET domain-containing protein [Dichomitus squalens LYAD-421 SS1]	--	--	--	--	--	gi|597993679|ref|XP_007366679.1|	domain-containing protein [Dichomitus squalens LYAD-421 SS1] >gi|395328146|gb|EJF60540.1| SET domain-containing protein [Dichomitus squalens LYAD-421 SS1]	--	--	--	--	--
GL22438-G	11.7333	111.89	3.2534	Up	0.945635	gi|597993679|ref|XP_007366679.1|	domain-containing protein [Dichomitus squalens LYAD-421 SS1] >gi|395328146|gb|EJF60540.1| SET domain-containing protein [Dichomitus squalens LYAD-421 SS1]	mgr:MGG_08614	hypothetical protein; K07117 uncharacterized protein	--	--	--	gi|597993679|ref|XP_007366679.1|	domain-containing protein [Dichomitus squalens LYAD-421 SS1] >gi|395328146|gb|EJF60540.1| SET domain-containing protein [Dichomitus squalens LYAD-421 SS1]	mgr:MGG_08614	hypothetical protein; K07117 uncharacterized protein	--	--	--
GL22440-G	48.1067	151.703	1.65694	Up	0.814586	gi|636621315|ref|XP_008041792.1|	protein TRAVEDRAFT_30879 [Trametes versicolor FP-101664 SS1] >gi|392561689|gb|EIW54870.1| hypothetical protein TRAVEDRAFT_30879 [Trametes versicolor FP-101664 SS1]	--	--	--	--	--	gi|636621315|ref|XP_008041792.1|	protein TRAVEDRAFT_30879 [Trametes versicolor FP-101664 SS1] >gi|392561689|gb|EIW54870.1| hypothetical protein TRAVEDRAFT_30879 [Trametes versicolor FP-101664 SS1]	--	--	--	--	--
GL22461-G	1023.86	341.433	-1.58434	Down	0.819483	gi|597996637|ref|XP_007367438.1|	protein DICSQDRAFT_108332 [Dichomitus squalens LYAD-421 SS1] >gi|395327326|gb|EJF59726.1| hypothetical protein DICSQDRAFT_108332 [Dichomitus squalens LYAD-421 SS1]	cci:CC1G_03511	hypothetical protein; K17801 mitochondrial protein MBA1	GO:0032979 protein insertion into mitochondrial membrane from inner side	--	GO:0005743 mitochondrial inner membrane	gi|597996637|ref|XP_007367438.1|	protein DICSQDRAFT_108332 [Dichomitus squalens LYAD-421 SS1] >gi|395327326|gb|EJF59726.1| hypothetical protein DICSQDRAFT_108332 [Dichomitus squalens LYAD-421 SS1]	cci:CC1G_03511	hypothetical protein; K17801 mitochondrial protein MBA1	GO:0032979 protein insertion into mitochondrial membrane from inner side	--	GO:0005743 mitochondrial inner membrane
GL22463-G	12.0433	92.3	2.9381	Up	0.92627	gi|597996645|ref|XP_007367440.1|	protein DICSQDRAFT_128064 [Dichomitus squalens LYAD-421 SS1] >gi|395327328|gb|EJF59728.1| hypothetical protein DICSQDRAFT_128064 [Dichomitus squalens LYAD-421 SS1]	--	--	--	--	--	gi|597996645|ref|XP_007367440.1|	protein DICSQDRAFT_128064 [Dichomitus squalens LYAD-421 SS1] >gi|395327328|gb|EJF59728.1| hypothetical protein DICSQDRAFT_128064 [Dichomitus squalens LYAD-421 SS1]	--	--	--	--	--
GL22471-G	2.38333	22.5767	3.24378	Up	0.805934	gi|597997677|ref|XP_007367699.1|	facilitator superfamily MFS-1 [Dichomitus squalens LYAD-421 SS1] >gi|395327130|gb|EJF59532.1| major facilitator superfamily MFS-1 [Dichomitus squalens LYAD-421 SS1]	--	--	--	--	--	gi|597997677|ref|XP_007367699.1|	facilitator superfamily MFS-1 [Dichomitus squalens LYAD-421 SS1] >gi|395327130|gb|EJF59532.1| major facilitator superfamily MFS-1 [Dichomitus squalens LYAD-421 SS1]	--	--	--	--	--
GL22474-G	249.143	40.2467	-2.63003	Down	0.937351	gi|597994877|ref|XP_007366985.1|	triacylglycerol lipase precursor [Dichomitus squalens LYAD-421 SS1] >gi|395327909|gb|EJF60305.1| extracellular triacylglycerol lipase precursor [Dichomitus squalens LYAD-421 SS1]	afm:AFUA_3G13880	extracellular lipase; K01046 triacylglycerol lipase [EC:3.1.1.3]	--	--	--	gi|597994877|ref|XP_007366985.1|	triacylglycerol lipase precursor [Dichomitus squalens LYAD-421 SS1] >gi|395327909|gb|EJF60305.1| extracellular triacylglycerol lipase precursor [Dichomitus squalens LYAD-421 SS1]	afm:AFUA_3G13880	extracellular lipase; K01046 triacylglycerol lipase [EC:3.1.1.3]	--	--	--
GL22509-G	25.5567	98.81	1.95096	Up	0.84784	--	--	--	--	--	--	--	--	--	--	--	--	--	--
GL22511-G	4.23333	64.95	3.93946	Up	0.934239	gi|597993507|ref|XP_007366635.1|	protease [Dichomitus squalens LYAD-421 SS1] >gi|395328102|gb|EJF60496.1| acid protease [Dichomitus squalens LYAD-421 SS1]	hir:HETIRDRAFT_39297	aspartic peptidase; K08245 phytepsin [EC:3.4.23.40]	--	--	--	gi|597993507|ref|XP_007366635.1|	protease [Dichomitus squalens LYAD-421 SS1] >gi|395328102|gb|EJF60496.1| acid protease [Dichomitus squalens LYAD-421 SS1]	hir:HETIRDRAFT_39297	aspartic peptidase; K08245 phytepsin [EC:3.4.23.40]	--	--	--
GL22515-G	10.65	45.16	2.08419	Up	0.813811	gi|597993511|ref|XP_007366636.1|	kinase homoserine dehydrogenase [Dichomitus squalens LYAD-421 SS1] >gi|395328103|gb|EJF60497.1| aspartate kinase homoserine dehydrogenase [Dichomitus squalens LYAD-421 SS1]	dsq:DICSQDRAFT_137344	aspartate kinase homoserine dehydrogenase; K00003 homoserine dehydrogenase [EC:1.1.1.3]	GO:0009088 threonine biosynthetic process | GO:0016310 phosphorylation | GO:0009086 methionine biosynthetic process | GO:0009097 isoleucine biosynthetic process | GO:0055114 oxidation-reduction process	GO:0050661 NADP binding | GO:0016301 kinase activity | GO:0004412 homoserine dehydrogenase activity	--	gi|597993511|ref|XP_007366636.1|	kinase homoserine dehydrogenase [Dichomitus squalens LYAD-421 SS1] >gi|395328103|gb|EJF60497.1| aspartate kinase homoserine dehydrogenase [Dichomitus squalens LYAD-421 SS1]	dsq:DICSQDRAFT_137344	aspartate kinase homoserine dehydrogenase; K00003 homoserine dehydrogenase [EC:1.1.1.3]	GO:0009088 threonine biosynthetic process | GO:0016310 phosphorylation | GO:0009086 methionine biosynthetic process | GO:0009097 isoleucine biosynthetic process | GO:0055114 oxidation-reduction process	GO:0050661 NADP binding | GO:0016301 kinase activity | GO:0004412 homoserine dehydrogenase activity	--
GL22519-G	21.5567	91.1133	2.07953	Up	0.862374	gi|597993683|ref|XP_007366680.1|	protein DICSQDRAFT_155681 [Dichomitus squalens LYAD-421 SS1] >gi|395328147|gb|EJF60541.1| hypothetical protein DICSQDRAFT_155681 [Dichomitus squalens LYAD-421 SS1]	dsq:DICSQDRAFT_155681	hypothetical protein; K20352 p24 family protein delta-1	GO:0006810 transport	--	GO:0016021 integral component of membrane	gi|597993683|ref|XP_007366680.1|	protein DICSQDRAFT_155681 [Dichomitus squalens LYAD-421 SS1] >gi|395328147|gb|EJF60541.1| hypothetical protein DICSQDRAFT_155681 [Dichomitus squalens LYAD-421 SS1]	dsq:DICSQDRAFT_155681	hypothetical protein; K20352 p24 family protein delta-1	GO:0006810 transport	--	GO:0016021 integral component of membrane
GL22523-G	96.76	349.13	1.85128	Up	0.861153	gi|598008181|ref|XP_007370491.1|	protein [Dichomitus squalens LYAD-421 SS1] >gi|395324369|gb|EJF56811.1| RNI-like protein [Dichomitus squalens LYAD-421 SS1]	--	--	GO:0006357 regulation of transcription from RNA polymerase II promoter	GO:0000981 RNA polymerase II transcription factor activity, sequence-specific DNA binding | GO:0008270 zinc ion binding	GO:0005634 nucleus	gi|598008181|ref|XP_007370491.1|	protein [Dichomitus squalens LYAD-421 SS1] >gi|395324369|gb|EJF56811.1| RNI-like protein [Dichomitus squalens LYAD-421 SS1]	--	--	GO:0006357 regulation of transcription from RNA polymerase II promoter	GO:0000981 RNA polymerase II transcription factor activity, sequence-specific DNA binding | GO:0008270 zinc ion binding	GO:0005634 nucleus
GL22527-G	24.8633	89.8633	1.85371	Up	0.828358	gi|598008083|ref|XP_007370476.1|	6-phosphate phosphatase [Dichomitus squalens LYAD-421 SS1] >gi|395324354|gb|EJF56796.1| trehalose 6-phosphate phosphatase [Dichomitus squalens LYAD-421 SS1]	dsq:DICSQDRAFT_112587	trehalose 6-phosphate phosphatase; K16055 trehalose 6-phosphate synthase/phosphatase [EC:2.4.1.15 3.1.3.12]	GO:0005992 trehalose biosynthetic process	GO:0016740 transferase activity	--	gi|598008083|ref|XP_007370476.1|	6-phosphate phosphatase [Dichomitus squalens LYAD-421 SS1] >gi|395324354|gb|EJF56796.1| trehalose 6-phosphate phosphatase [Dichomitus squalens LYAD-421 SS1]	dsq:DICSQDRAFT_112587	trehalose 6-phosphate phosphatase; K16055 trehalose 6-phosphate synthase/phosphatase [EC:2.4.1.15 3.1.3.12]	GO:0005992 trehalose biosynthetic process	GO:0016740 transferase activity	--
GL22528-G	13.9533	70.18	2.33045	Up	0.874504	gi|598008075|ref|XP_007370474.1|	protein DICSQDRAFT_93122 [Dichomitus squalens LYAD-421 SS1] >gi|395324352|gb|EJF56794.1| hypothetical protein DICSQDRAFT_93122 [Dichomitus squalens LYAD-421 SS1]	--	--	--	--	GO:0016021 integral component of membrane	gi|598008075|ref|XP_007370474.1|	protein DICSQDRAFT_93122 [Dichomitus squalens LYAD-421 SS1] >gi|395324352|gb|EJF56794.1| hypothetical protein DICSQDRAFT_93122 [Dichomitus squalens LYAD-421 SS1]	--	--	--	--	GO:0016021 integral component of membrane
GL22529-G	74.3367	235.28	1.66223	Up	0.8235	gi|597996749|ref|XP_007367466.1|	protein DICSQDRAFT_64425 [Dichomitus squalens LYAD-421 SS1] >gi|395327354|gb|EJF59754.1| hypothetical protein DICSQDRAFT_64425 [Dichomitus squalens LYAD-421 SS1]	dsq:DICSQDRAFT_64425	hypothetical protein; K18168 succinate dehydrogenase assembly factor 2	GO:0018293 protein-FAD linkage	--	GO:0005739 mitochondrion	gi|597996749|ref|XP_007367466.1|	protein DICSQDRAFT_64425 [Dichomitus squalens LYAD-421 SS1] >gi|395327354|gb|EJF59754.1| hypothetical protein DICSQDRAFT_64425 [Dichomitus squalens LYAD-421 SS1]	dsq:DICSQDRAFT_64425	hypothetical protein; K18168 succinate dehydrogenase assembly factor 2	GO:0018293 protein-FAD linkage	--	GO:0005739 mitochondrion
GL22531-G	11.0967	56.26	2.34198	Up	0.859328	gi|597996729|ref|XP_007367461.1|	translation initiation factor 4A-like protein [Dichomitus squalens LYAD-421 SS1] >gi|395327349|gb|EJF59749.1| eukaryotic translation initiation factor 4A-like protein [Dichomitus squalens LYAD-421 SS1]	dsq:DICSQDRAFT_88817	eukaryotic translation initiation factor 4A-like protein; K12614 ATP-dependent RNA helicase DDX6/DHH1 [EC:3.6.4.13]	GO:0006413 translational initiation	GO:0004386 helicase activity | GO:0005524 ATP binding | GO:0003743 translation initiation factor activity	--	gi|597996729|ref|XP_007367461.1|	translation initiation factor 4A-like protein [Dichomitus squalens LYAD-421 SS1] >gi|395327349|gb|EJF59749.1| eukaryotic translation initiation factor 4A-like protein [Dichomitus squalens LYAD-421 SS1]	dsq:DICSQDRAFT_88817	eukaryotic translation initiation factor 4A-like protein; K12614 ATP-dependent RNA helicase DDX6/DHH1 [EC:3.6.4.13]	GO:0006413 translational initiation	GO:0004386 helicase activity | GO:0005524 ATP binding | GO:0003743 translation initiation factor activity	--
GL22537-G	45.0967	9.93	-2.18316	Down	0.824563	gi|598002169|ref|XP_007368868.1|	protein DICSQDRAFT_110272 [Dichomitus squalens LYAD-421 SS1] >gi|395325918|gb|EJF58333.1| hypothetical protein DICSQDRAFT_110272 [Dichomitus squalens LYAD-421 SS1]	ela:UCREL1_1659	putative atp binding protein; K11701 helicase required for RNAi-mediated heterochromatin assembly 1 [EC:3.6.4.13]	--	GO:0046872 metal ion binding	--	gi|598002169|ref|XP_007368868.1|	protein DICSQDRAFT_110272 [Dichomitus squalens LYAD-421 SS1] >gi|395325918|gb|EJF58333.1| hypothetical protein DICSQDRAFT_110272 [Dichomitus squalens LYAD-421 SS1]	ela:UCREL1_1659	putative atp binding protein; K11701 helicase required for RNAi-mediated heterochromatin assembly 1 [EC:3.6.4.13]	--	GO:0046872 metal ion binding	--
GL22551-G	115.653	361.827	1.64549	Up	0.826861	gi|597997759|ref|XP_007367721.1|	protein DICSQDRAFT_64767 [Dichomitus squalens LYAD-421 SS1] >gi|395327152|gb|EJF59554.1| hypothetical protein DICSQDRAFT_64767 [Dichomitus squalens LYAD-421 SS1]	--	--	--	--	GO:0016021 integral component of membrane	gi|597997759|ref|XP_007367721.1|	protein DICSQDRAFT_64767 [Dichomitus squalens LYAD-421 SS1] >gi|395327152|gb|EJF59554.1| hypothetical protein DICSQDRAFT_64767 [Dichomitus squalens LYAD-421 SS1]	--	--	--	--	GO:0016021 integral component of membrane
GL22554-G	10.0733	43.8833	2.12313	Up	0.815229	gi|597997783|ref|XP_007367728.1|	general substrate transporter [Dichomitus squalens LYAD-421 SS1] >gi|395327159|gb|EJF59561.1| MFS general substrate transporter [Dichomitus squalens LYAD-421 SS1]	--	--	GO:0055085 transmembrane transport	--	GO:0016021 integral component of membrane	gi|597997783|ref|XP_007367728.1|	general substrate transporter [Dichomitus squalens LYAD-421 SS1] >gi|395327159|gb|EJF59561.1| MFS general substrate transporter [Dichomitus squalens LYAD-421 SS1]	--	--	GO:0055085 transmembrane transport	--	GO:0016021 integral component of membrane
GL22568-G	11.0533	79.8233	2.85233	Up	0.915649	gi|598000281|ref|XP_007368386.1|	protein DICSQDRAFT_162711 [Dichomitus squalens LYAD-421 SS1] >gi|395326505|gb|EJF58914.1| hypothetical protein DICSQDRAFT_162711 [Dichomitus squalens LYAD-421 SS1]	pco:PHACADRAFT_261437	hypothetical protein; K09448 transcriptional enhancer factor	--	--	--	gi|598000281|ref|XP_007368386.1|	protein DICSQDRAFT_162711 [Dichomitus squalens LYAD-421 SS1] >gi|395326505|gb|EJF58914.1| hypothetical protein DICSQDRAFT_162711 [Dichomitus squalens LYAD-421 SS1]	pco:PHACADRAFT_261437	hypothetical protein; K09448 transcriptional enhancer factor	--	--	--
GL22575-G	5.74	79.7033	3.79552	Up	0.942589	gi|598000337|ref|XP_007368400.1|	protein DICSQDRAFT_66062 [Dichomitus squalens LYAD-421 SS1] >gi|395326519|gb|EJF58928.1| hypothetical protein DICSQDRAFT_66062 [Dichomitus squalens LYAD-421 SS1]	--	--	--	--	--	gi|598000337|ref|XP_007368400.1|	protein DICSQDRAFT_66062 [Dichomitus squalens LYAD-421 SS1] >gi|395326519|gb|EJF58928.1| hypothetical protein DICSQDRAFT_66062 [Dichomitus squalens LYAD-421 SS1]	--	--	--	--	--
GL22577-G	4.86333	28.1867	2.535	Up	0.800985	gi|598000353|ref|XP_007368404.1|	protein DICSQDRAFT_128637 [Dichomitus squalens LYAD-421 SS1] >gi|395326523|gb|EJF58932.1| hypothetical protein DICSQDRAFT_128637 [Dichomitus squalens LYAD-421 SS1]	--	--	--	--	GO:0016020 membrane	gi|598000353|ref|XP_007368404.1|	protein DICSQDRAFT_128637 [Dichomitus squalens LYAD-421 SS1] >gi|395326523|gb|EJF58932.1| hypothetical protein DICSQDRAFT_128637 [Dichomitus squalens LYAD-421 SS1]	--	--	--	--	GO:0016020 membrane
GL22578-G	32.08	5.98333	-2.42265	Down	0.809899	gi|598000353|ref|XP_007368404.1|	protein DICSQDRAFT_128637 [Dichomitus squalens LYAD-421 SS1] >gi|395326523|gb|EJF58932.1| hypothetical protein DICSQDRAFT_128637 [Dichomitus squalens LYAD-421 SS1]	--	--	--	--	--	gi|598000353|ref|XP_007368404.1|	protein DICSQDRAFT_128637 [Dichomitus squalens LYAD-421 SS1] >gi|395326523|gb|EJF58932.1| hypothetical protein DICSQDRAFT_128637 [Dichomitus squalens LYAD-421 SS1]	--	--	--	--	--
GL22583-G	57.7033	261.377	2.1794	Up	0.901996	gi|598000371|ref|XP_007368409.1|	oxidoreductase [Dichomitus squalens LYAD-421 SS1] >gi|395326528|gb|EJF58937.1| GMC oxidoreductase [Dichomitus squalens LYAD-421 SS1]	ppl:POSPLDRAFT_49652	hypothetical GMC oxidoreductase; K00108 choline dehydrogenase [EC:1.1.99.1]	GO:0055114 oxidation-reduction process	GO:0050660 flavin adenine dinucleotide binding | GO:0016614 oxidoreductase activity, acting on CH-OH group of donors	--	gi|598000371|ref|XP_007368409.1|	oxidoreductase [Dichomitus squalens LYAD-421 SS1] >gi|395326528|gb|EJF58937.1| GMC oxidoreductase [Dichomitus squalens LYAD-421 SS1]	ppl:POSPLDRAFT_49652	hypothetical GMC oxidoreductase; K00108 choline dehydrogenase [EC:1.1.99.1]	GO:0055114 oxidation-reduction process	GO:0050660 flavin adenine dinucleotide binding | GO:0016614 oxidoreductase activity, acting on CH-OH group of donors	--
GL22586-G	80.2767	6.76667	-3.56846	Down	0.93848	gi|597970213|ref|XP_007360624.1|	[Dichomitus squalens LYAD-421 SS1] >gi|395334835|gb|EJF67211.1| beta-xylosidase [Dichomitus squalens LYAD-421 SS1]	dsq:DICSQDRAFT_158716	beta-xylosidase; K15920 beta-D-xylosidase 4 [EC:3.2.1.37]	GO:0005975 carbohydrate metabolic process	GO:0004553 hydrolase activity, hydrolyzing O-glycosyl compounds	--	gi|597970213|ref|XP_007360624.1|	[Dichomitus squalens LYAD-421 SS1] >gi|395334835|gb|EJF67211.1| beta-xylosidase [Dichomitus squalens LYAD-421 SS1]	dsq:DICSQDRAFT_158716	beta-xylosidase; K15920 beta-D-xylosidase 4 [EC:3.2.1.37]	GO:0005975 carbohydrate metabolic process	GO:0004553 hydrolase activity, hydrolyzing O-glycosyl compounds	--
GL22604-G	33.1967	161.887	2.28587	Up	0.903689	gi|597967717|ref|XP_007359994.1|	protein DICSQDRAFT_130703 [Dichomitus squalens LYAD-421 SS1] >gi|395334046|gb|EJF66422.1| hypothetical protein DICSQDRAFT_130703 [Dichomitus squalens LYAD-421 SS1]	wic:J056_001240	Splicing factor U2AF 50 kDa subunit; K12837 splicing factor U2AF 65 kDa subunit	--	--	--	gi|597967717|ref|XP_007359994.1|	protein DICSQDRAFT_130703 [Dichomitus squalens LYAD-421 SS1] >gi|395334046|gb|EJF66422.1| hypothetical protein DICSQDRAFT_130703 [Dichomitus squalens LYAD-421 SS1]	wic:J056_001240	Splicing factor U2AF 50 kDa subunit; K12837 splicing factor U2AF 65 kDa subunit	--	--	--
GL22643-G	36.9333	133.353	1.85226	Up	0.843757	gi|597977601|ref|XP_007362532.1|	hydrophobin [Dichomitus squalens LYAD-421 SS1] >gi|395332357|gb|EJF64736.1| fungal hydrophobin [Dichomitus squalens LYAD-421 SS1]	psq:PUNSTDRAFT_125108	PP2C-domain-containing protein; K19704 protein phosphatase PTC1 [EC:3.1.3.16]	--	--	--	gi|597977601|ref|XP_007362532.1|	hydrophobin [Dichomitus squalens LYAD-421 SS1] >gi|395332357|gb|EJF64736.1| fungal hydrophobin [Dichomitus squalens LYAD-421 SS1]	psq:PUNSTDRAFT_125108	PP2C-domain-containing protein; K19704 protein phosphatase PTC1 [EC:3.1.3.16]	--	--	--
GL22646-G	31.44	105.877	1.75171	Up	0.818577	gi|598008031|ref|XP_007370467.1|	protein DICSQDRAFT_93113 [Dichomitus squalens LYAD-421 SS1] >gi|395324345|gb|EJF56787.1| hypothetical protein DICSQDRAFT_93113 [Dichomitus squalens LYAD-421 SS1]	sla:SERLADRAFT_458531	hypothetical protein; K09274 HMG box factor, other	--	--	--	gi|598008031|ref|XP_007370467.1|	protein DICSQDRAFT_93113 [Dichomitus squalens LYAD-421 SS1] >gi|395324345|gb|EJF56787.1| hypothetical protein DICSQDRAFT_93113 [Dichomitus squalens LYAD-421 SS1]	sla:SERLADRAFT_458531	hypothetical protein; K09274 HMG box factor, other	--	--	--
GL22658-G	5.03333	29.9633	2.57361	Up	0.812498	gi|597993645|ref|XP_007366670.1|	protein DICSQDRAFT_62450 [Dichomitus squalens LYAD-421 SS1] >gi|395328137|gb|EJF60531.1| hypothetical protein DICSQDRAFT_62450 [Dichomitus squalens LYAD-421 SS1]	dsq:DICSQDRAFT_62450	hypothetical protein; K20803 ubiquitin-protein ligase E3 D [EC:2.3.2.26]	--	--	--	gi|597993645|ref|XP_007366670.1|	protein DICSQDRAFT_62450 [Dichomitus squalens LYAD-421 SS1] >gi|395328137|gb|EJF60531.1| hypothetical protein DICSQDRAFT_62450 [Dichomitus squalens LYAD-421 SS1]	dsq:DICSQDRAFT_62450	hypothetical protein; K20803 ubiquitin-protein ligase E3 D [EC:2.3.2.26]	--	--	--
GL22662-G	29.3933	115.277	1.97154	Up	0.857345	gi|597998377|ref|XP_007367881.1|	protein [Dichomitus squalens LYAD-421 SS1] >gi|395326894|gb|EJF59298.1| NAD(P)-binding protein [Dichomitus squalens LYAD-421 SS1]	dsq:DICSQDRAFT_108886	NAD(P)-binding protein; K00065 2-deoxy-D-gluconate 3-dehydrogenase [EC:1.1.1.125]	GO:0055114 oxidation-reduction process	GO:0016491 oxidoreductase activity	--	gi|597998377|ref|XP_007367881.1|	protein [Dichomitus squalens LYAD-421 SS1] >gi|395326894|gb|EJF59298.1| NAD(P)-binding protein [Dichomitus squalens LYAD-421 SS1]	dsq:DICSQDRAFT_108886	NAD(P)-binding protein; K00065 2-deoxy-D-gluconate 3-dehydrogenase [EC:1.1.1.125]	GO:0055114 oxidation-reduction process	GO:0016491 oxidoreductase activity	--
GL22674-G	48.8133	174.527	1.8381	Up	0.84893	gi|597996705|ref|XP_007367455.1|	protein DICSQDRAFT_88812 [Dichomitus squalens LYAD-421 SS1] >gi|395327343|gb|EJF59743.1| hypothetical protein DICSQDRAFT_88812 [Dichomitus squalens LYAD-421 SS1]	--	--	--	--	GO:0016020 membrane	gi|597996705|ref|XP_007367455.1|	protein DICSQDRAFT_88812 [Dichomitus squalens LYAD-421 SS1] >gi|395327343|gb|EJF59743.1| hypothetical protein DICSQDRAFT_88812 [Dichomitus squalens LYAD-421 SS1]	--	--	--	--	GO:0016020 membrane
GL22675-G	4.96	42.0067	3.08221	Up	0.877865	gi|636621747|ref|XP_008042008.1|	protein TRAVEDRAFT_51159 [Trametes versicolor FP-101664 SS1] >gi|392561849|gb|EIW55030.1| hypothetical protein TRAVEDRAFT_51159 [Trametes versicolor FP-101664 SS1]	--	--	--	--	--	gi|636621747|ref|XP_008042008.1|	protein TRAVEDRAFT_51159 [Trametes versicolor FP-101664 SS1] >gi|392561849|gb|EIW55030.1| hypothetical protein TRAVEDRAFT_51159 [Trametes versicolor FP-101664 SS1]	--	--	--	--	--
GL22686-G	25.9933	113.363	2.12474	Up	0.876159	gi|598006211|ref|XP_007369980.1|	containing nucleoside triphosphate hydrolase protein [Dichomitus squalens LYAD-421 SS1] >gi|395324818|gb|EJF57251.1| P-loop containing nucleoside triphosphate hydrolase protein [Dichomitus squalens LYAD-421 SS1]	ppl:POSPLDRAFT_39119	hypothetical protein; K02021 putative ABC transport system ATP-binding protein	GO:0055085 transmembrane transport | GO:0008152 metabolic process	GO:0042626 ATPase activity, coupled to transmembrane movement of substances | GO:0005524 ATP binding	GO:0016021 integral component of membrane	gi|598006211|ref|XP_007369980.1|	containing nucleoside triphosphate hydrolase protein [Dichomitus squalens LYAD-421 SS1] >gi|395324818|gb|EJF57251.1| P-loop containing nucleoside triphosphate hydrolase protein [Dichomitus squalens LYAD-421 SS1]	ppl:POSPLDRAFT_39119	hypothetical protein; K02021 putative ABC transport system ATP-binding protein	GO:0055085 transmembrane transport | GO:0008152 metabolic process	GO:0042626 ATPase activity, coupled to transmembrane movement of substances | GO:0005524 ATP binding	GO:0016021 integral component of membrane
GL22690-G	55.58	9.79667	-2.5042	Down	0.871222	--	--	--	--	--	--	--	--	--	--	--	--	--	--
GL22724-G	235.617	60.91	-1.95169	Down	0.871524	--	--	--	--	--	--	--	--	--	--	--	--	--	--
GL22734-G	375.013	121.487	-1.62614	Down	0.822949	gi|636623707|ref|XP_008042988.1|	protein TRAVEDRAFT_132071 [Trametes versicolor FP-101664 SS1] >gi|392560857|gb|EIW54039.1| hypothetical protein TRAVEDRAFT_132071 [Trametes versicolor FP-101664 SS1]	--	--	--	--	--	gi|636623707|ref|XP_008042988.1|	protein TRAVEDRAFT_132071 [Trametes versicolor FP-101664 SS1] >gi|392560857|gb|EIW54039.1| hypothetical protein TRAVEDRAFT_132071 [Trametes versicolor FP-101664 SS1]	--	--	--	--	--
GL22736-G	28.3267	112.13	1.98494	Up	0.857687	gi|449542283|gb|EMD33263.1|	protein CERSUDRAFT_87573 [Gelatoporia subvermispora B]	sla:SERLADRAFT_367910	hypothetical protein; K12623 U6 snRNA-associated Sm-like protein LSm4	GO:0006396 RNA processing	--	--	gi|449542283|gb|EMD33263.1|	protein CERSUDRAFT_87573 [Gelatoporia subvermispora B]	sla:SERLADRAFT_367910	hypothetical protein; K12623 U6 snRNA-associated Sm-like protein LSm4	GO:0006396 RNA processing	--	--
GL22748-G	21.8667	79.9033	1.86952	Up	0.825548	gi|597992955|ref|XP_007366490.1|	phospholipase D [Dichomitus squalens LYAD-421 SS1] >gi|395328260|gb|EJF60653.1| N-acyl-phosphatidylethanolamine-hydrolyzing phospholipase D [Dichomitus squalens LYAD-421 SS1]	cci:CC1G_02616	N-acyl-phosphatidylethanolamine-hydrolyzing phospholipase D; K13985 N-acyl-phosphatidylethanolamine-hydrolysing phospholipase D [EC:3.1.4.54]	--	--	--	gi|597992955|ref|XP_007366490.1|	phospholipase D [Dichomitus squalens LYAD-421 SS1] >gi|395328260|gb|EJF60653.1| N-acyl-phosphatidylethanolamine-hydrolyzing phospholipase D [Dichomitus squalens LYAD-421 SS1]	cci:CC1G_02616	N-acyl-phosphatidylethanolamine-hydrolyzing phospholipase D; K13985 N-acyl-phosphatidylethanolamine-hydrolysing phospholipase D [EC:3.1.4.54]	--	--	--
GL22791-G	6.64	58.71	3.14435	Up	0.908284	gi|597986363|ref|XP_007364777.1|	protein DICSQDRAFT_154520 [Dichomitus squalens LYAD-421 SS1] >gi|395330320|gb|EJF62704.1| hypothetical protein DICSQDRAFT_154520 [Dichomitus squalens LYAD-421 SS1]	tms:TREMEDRAFT_72775	hypothetical protein; K17887 sorting nexin-25	--	--	GO:0016021 integral component of membrane	gi|597986363|ref|XP_007364777.1|	protein DICSQDRAFT_154520 [Dichomitus squalens LYAD-421 SS1] >gi|395330320|gb|EJF62704.1| hypothetical protein DICSQDRAFT_154520 [Dichomitus squalens LYAD-421 SS1]	tms:TREMEDRAFT_72775	hypothetical protein; K17887 sorting nexin-25	--	--	GO:0016021 integral component of membrane
GL22820-G	18.03	69.7867	1.95255	Up	0.82971	gi|598010265|ref|XP_007370983.1|	initiation factor eIF-2A [Dichomitus squalens LYAD-421 SS1] >gi|395323855|gb|EJF56310.1| translation initiation factor eIF-2A [Dichomitus squalens LYAD-421 SS1]	dsq:DICSQDRAFT_141356	translation initiation factor eIF-2A; K15026 translation initiation factor 2A	GO:0006413 translational initiation	GO:0003743 translation initiation factor activity	--	gi|598010265|ref|XP_007370983.1|	initiation factor eIF-2A [Dichomitus squalens LYAD-421 SS1] >gi|395323855|gb|EJF56310.1| translation initiation factor eIF-2A [Dichomitus squalens LYAD-421 SS1]	dsq:DICSQDRAFT_141356	translation initiation factor eIF-2A; K15026 translation initiation factor 2A	GO:0006413 translational initiation	GO:0003743 translation initiation factor activity	--
GL22828-G	10.7267	100.55	3.22864	Up	0.941014	gi|597986293|ref|XP_007364759.1|	protein [Dichomitus squalens LYAD-421 SS1] >gi|395330302|gb|EJF62686.1| thioredoxin-like protein [Dichomitus squalens LYAD-421 SS1]	--	--	--	--	--	gi|597986293|ref|XP_007364759.1|	protein [Dichomitus squalens LYAD-421 SS1] >gi|395330302|gb|EJF62686.1| thioredoxin-like protein [Dichomitus squalens LYAD-421 SS1]	--	--	--	--	--
GL22843-G	29.0967	163.287	2.48848	Up	0.920599	gi|598010147|ref|XP_007370954.1|	protein ypt1 [Dichomitus squalens LYAD-421 SS1] >gi|395323826|gb|EJF56281.1| GTP-binding protein ypt1 [Dichomitus squalens LYAD-421 SS1]	dsq:DICSQDRAFT_175019	GTP-binding protein ypt1; K07874 Ras-related protein Rab-1A	GO:0007264 small GTPase mediated signal transduction | GO:0015031 protein transport	GO:0005525 GTP binding	GO:0005622 intracellular	gi|598010147|ref|XP_007370954.1|	protein ypt1 [Dichomitus squalens LYAD-421 SS1] >gi|395323826|gb|EJF56281.1| GTP-binding protein ypt1 [Dichomitus squalens LYAD-421 SS1]	dsq:DICSQDRAFT_175019	GTP-binding protein ypt1; K07874 Ras-related protein Rab-1A	GO:0007264 small GTPase mediated signal transduction | GO:0015031 protein transport	GO:0005525 GTP binding	GO:0005622 intracellular
GL22881-G	24.35	103.427	2.08661	Up	0.869371	gi|597986389|ref|XP_007364784.1|	glycosyltransferase [Dichomitus squalens LYAD-421 SS1] >gi|395330327|gb|EJF62711.1| dolichyl-diphosphooligosaccharide-protein glycosyltransferase [Dichomitus squalens LYAD-421 SS1]	dsq:DICSQDRAFT_161008	dolichyl-diphosphooligosaccharide-protein glycosyltransferase; K12670 oligosaccharyltransferase complex subunit beta	GO:0018279 protein N-linked glycosylation via asparagine	GO:0016757 transferase activity, transferring glycosyl groups	GO:0005789 endoplasmic reticulum membrane | GO:0016021 integral component of membrane	gi|597986389|ref|XP_007364784.1|	glycosyltransferase [Dichomitus squalens LYAD-421 SS1] >gi|395330327|gb|EJF62711.1| dolichyl-diphosphooligosaccharide-protein glycosyltransferase [Dichomitus squalens LYAD-421 SS1]	dsq:DICSQDRAFT_161008	dolichyl-diphosphooligosaccharide-protein glycosyltransferase; K12670 oligosaccharyltransferase complex subunit beta	GO:0018279 protein N-linked glycosylation via asparagine	GO:0016757 transferase activity, transferring glycosyl groups	GO:0005789 endoplasmic reticulum membrane | GO:0016021 integral component of membrane
GL22901-G	8.40333	38.42	2.19282	Up	0.809269	gi|598003665|ref|XP_007369289.1|	serine/threonine phosphatase 2C [Dichomitus squalens LYAD-421 SS1] >gi|395325621|gb|EJF58041.1| protein serine/threonine phosphatase 2C [Dichomitus squalens LYAD-421 SS1]	dsq:DICSQDRAFT_139858	protein serine/threonine phosphatase 2C; K01102 pyruvate dehydrogenase phosphatase [EC:3.1.3.43]	GO:0006470 protein dephosphorylation	GO:0004722 protein serine/threonine phosphatase activity	GO:0016021 integral component of membrane	gi|598003665|ref|XP_007369289.1|	serine/threonine phosphatase 2C [Dichomitus squalens LYAD-421 SS1] >gi|395325621|gb|EJF58041.1| protein serine/threonine phosphatase 2C [Dichomitus squalens LYAD-421 SS1]	dsq:DICSQDRAFT_139858	protein serine/threonine phosphatase 2C; K01102 pyruvate dehydrogenase phosphatase [EC:3.1.3.43]	GO:0006470 protein dephosphorylation	GO:0004722 protein serine/threonine phosphatase activity	GO:0016021 integral component of membrane
GL22913-G	120692	42357.5	-1.51064	Down	0.805921	gi|598003953|ref|XP_007369361.1|	chaperone [Dichomitus squalens LYAD-421 SS1] >gi|395325442|gb|EJF57864.1| HSP20-like chaperone [Dichomitus squalens LYAD-421 SS1]	dsq:DICSQDRAFT_68215	HSP20-like chaperone; K13993 HSP20 family protein	--	--	--	gi|598003953|ref|XP_007369361.1|	chaperone [Dichomitus squalens LYAD-421 SS1] >gi|395325442|gb|EJF57864.1| HSP20-like chaperone [Dichomitus squalens LYAD-421 SS1]	dsq:DICSQDRAFT_68215	HSP20-like chaperone; K13993 HSP20 family protein	--	--	--
GL22915-G	8.36	57.8067	2.78966	Up	0.892136	gi|598003231|ref|XP_007369166.1|	protein dnm1 [Dichomitus squalens LYAD-421 SS1] >gi|395325641|gb|EJF58060.1| dynamin protein dnm1 [Dichomitus squalens LYAD-421 SS1]	dsq:DICSQDRAFT_173293	dynamin protein dnm1; K17065 dynamin 1-like protein [EC:3.6.5.5]	GO:0008152 metabolic process	GO:0003924 GTPase activity | GO:0005525 GTP binding	--	gi|598003231|ref|XP_007369166.1|	protein dnm1 [Dichomitus squalens LYAD-421 SS1] >gi|395325641|gb|EJF58060.1| dynamin protein dnm1 [Dichomitus squalens LYAD-421 SS1]	dsq:DICSQDRAFT_173293	dynamin protein dnm1; K17065 dynamin 1-like protein [EC:3.6.5.5]	GO:0008152 metabolic process	GO:0003924 GTPase activity | GO:0005525 GTP binding	--
GL22936-G	11.92	65.0333	2.4478	Up	0.878745	gi|598010349|ref|XP_007371002.1|	protein DICSQDRAFT_71854 [Dichomitus squalens LYAD-421 SS1] >gi|395323809|gb|EJF56265.1| hypothetical protein DICSQDRAFT_71854 [Dichomitus squalens LYAD-421 SS1]	bcom:BAUCODRAFT_146280	hypothetical protein; K11231 osomolarity two-component system, sensor histidine kinase SLN1 [EC:2.7.13.3]	GO:0016310 phosphorylation | GO:0007165 signal transduction	GO:0016301 kinase activity	GO:0016020 membrane	gi|598010349|ref|XP_007371002.1|	protein DICSQDRAFT_71854 [Dichomitus squalens LYAD-421 SS1] >gi|395323809|gb|EJF56265.1| hypothetical protein DICSQDRAFT_71854 [Dichomitus squalens LYAD-421 SS1]	bcom:BAUCODRAFT_146280	hypothetical protein; K11231 osomolarity two-component system, sensor histidine kinase SLN1 [EC:2.7.13.3]	GO:0016310 phosphorylation | GO:0007165 signal transduction	GO:0016301 kinase activity	GO:0016020 membrane
GL22937-G	204.02	11.22	-4.18457	Down	0.975397	gi|598010393|ref|XP_007371011.1|	protein, partial [Dichomitus squalens LYAD-421 SS1] >gi|395323818|gb|EJF56274.1| NAD(P)-binding protein, partial [Dichomitus squalens LYAD-421 SS1]	hir:HETIRDRAFT_108469	hypothetical protein; K20308 trafficking protein particle complex subunit 11	--	--	--	gi|598010393|ref|XP_007371011.1|	protein, partial [Dichomitus squalens LYAD-421 SS1] >gi|395323818|gb|EJF56274.1| NAD(P)-binding protein, partial [Dichomitus squalens LYAD-421 SS1]	hir:HETIRDRAFT_108469	hypothetical protein; K20308 trafficking protein particle complex subunit 11	--	--	--
GL22969-G	21.9767	74.18	1.75506	Up	0.802481	gi|598003227|ref|XP_007369165.1|	aminopeptidase [Dichomitus squalens LYAD-421 SS1] >gi|395325640|gb|EJF58059.1| dipeptidyl aminopeptidase [Dichomitus squalens LYAD-421 SS1]	dsq:DICSQDRAFT_110766	dipeptidyl aminopeptidase; K01282 dipeptidyl aminopeptidase [EC:3.4.14.-]	GO:0006508 proteolysis	GO:0004252 serine-type endopeptidase activity | GO:0004177 aminopeptidase activity	GO:0016021 integral component of membrane	gi|598003227|ref|XP_007369165.1|	aminopeptidase [Dichomitus squalens LYAD-421 SS1] >gi|395325640|gb|EJF58059.1| dipeptidyl aminopeptidase [Dichomitus squalens LYAD-421 SS1]	dsq:DICSQDRAFT_110766	dipeptidyl aminopeptidase; K01282 dipeptidyl aminopeptidase [EC:3.4.14.-]	GO:0006508 proteolysis	GO:0004252 serine-type endopeptidase activity | GO:0004177 aminopeptidase activity	GO:0016021 integral component of membrane
GL22991-G	6.95667	47.79	2.78024	Up	0.876159	gi|598003317|ref|XP_007369193.1|	protein DICSQDRAFT_91323 [Dichomitus squalens LYAD-421 SS1] >gi|395325668|gb|EJF58087.1| hypothetical protein DICSQDRAFT_91323 [Dichomitus squalens LYAD-421 SS1]	--	--	--	--	GO:0016021 integral component of membrane	gi|598003317|ref|XP_007369193.1|	protein DICSQDRAFT_91323 [Dichomitus squalens LYAD-421 SS1] >gi|395325668|gb|EJF58087.1| hypothetical protein DICSQDRAFT_91323 [Dichomitus squalens LYAD-421 SS1]	--	--	--	--	GO:0016021 integral component of membrane
GL22997-G	12.11	59.1867	2.28907	Up	0.858291	gi|598003393|ref|XP_007369215.1|	protein DICSQDRAFT_67799 [Dichomitus squalens LYAD-421 SS1] >gi|395325690|gb|EJF58109.1| hypothetical protein DICSQDRAFT_67799 [Dichomitus squalens LYAD-421 SS1]	--	--	--	--	GO:0016020 membrane	gi|598003393|ref|XP_007369215.1|	protein DICSQDRAFT_67799 [Dichomitus squalens LYAD-421 SS1] >gi|395325690|gb|EJF58109.1| hypothetical protein DICSQDRAFT_67799 [Dichomitus squalens LYAD-421 SS1]	--	--	--	--	GO:0016020 membrane
GL23026-G	28.33	120.093	2.08375	Up	0.874255	gi|597999521|ref|XP_007368178.1|	protein [Dichomitus squalens LYAD-421 SS1] >gi|395326651|gb|EJF59058.1| DnaJ-domain-containing protein [Dichomitus squalens LYAD-421 SS1]	cdu:CD36_29510	mitochondrial protein import protein, putative; K09503 DnaJ homolog subfamily A member 2	--	--	--	gi|597999521|ref|XP_007368178.1|	protein [Dichomitus squalens LYAD-421 SS1] >gi|395326651|gb|EJF59058.1| DnaJ-domain-containing protein [Dichomitus squalens LYAD-421 SS1]	cdu:CD36_29510	mitochondrial protein import protein, putative; K09503 DnaJ homolog subfamily A member 2	--	--	--
GL23030-G	13.9867	52.4967	1.90817	Up	0.802284	gi|597992421|ref|XP_007366344.1|	protein DICSQDRAFT_61804 [Dichomitus squalens LYAD-421 SS1] >gi|395328417|gb|EJF60809.1| hypothetical protein DICSQDRAFT_61804 [Dichomitus squalens LYAD-421 SS1]	--	--	--	--	--	gi|597992421|ref|XP_007366344.1|	protein DICSQDRAFT_61804 [Dichomitus squalens LYAD-421 SS1] >gi|395328417|gb|EJF60809.1| hypothetical protein DICSQDRAFT_61804 [Dichomitus squalens LYAD-421 SS1]	--	--	--	--	--
GL23042-G	8.42	45.7467	2.44177	Up	0.849875	gi|597992659|ref|XP_007366410.1|	protein DICSQDRAFT_87357 [Dichomitus squalens LYAD-421 SS1] >gi|395328483|gb|EJF60875.1| hypothetical protein DICSQDRAFT_87357 [Dichomitus squalens LYAD-421 SS1]	--	--	GO:0034765 regulation of ion transmembrane transport	GO:0005244 voltage-gated ion channel activity	GO:0016021 integral component of membrane	gi|597992659|ref|XP_007366410.1|	protein DICSQDRAFT_87357 [Dichomitus squalens LYAD-421 SS1] >gi|395328483|gb|EJF60875.1| hypothetical protein DICSQDRAFT_87357 [Dichomitus squalens LYAD-421 SS1]	--	--	GO:0034765 regulation of ion transmembrane transport	GO:0005244 voltage-gated ion channel activity	GO:0016021 integral component of membrane
GL23047-G	57.6767	409.393	2.82743	Up	0.953184	gi|597992687|ref|XP_007366418.1|	protein DICSQDRAFT_87372 [Dichomitus squalens LYAD-421 SS1] >gi|395328491|gb|EJF60883.1| hypothetical protein DICSQDRAFT_87372 [Dichomitus squalens LYAD-421 SS1]	pbn:PADG_02057	T-complex protein 1 subunit theta; K09500 T-complex protein 1 subunit theta	GO:0006508 proteolysis	GO:0004222 metalloendopeptidase activity	--	gi|597992687|ref|XP_007366418.1|	protein DICSQDRAFT_87372 [Dichomitus squalens LYAD-421 SS1] >gi|395328491|gb|EJF60883.1| hypothetical protein DICSQDRAFT_87372 [Dichomitus squalens LYAD-421 SS1]	pbn:PADG_02057	T-complex protein 1 subunit theta; K09500 T-complex protein 1 subunit theta	GO:0006508 proteolysis	GO:0004222 metalloendopeptidase activity	--
GL23057-G	24.8667	85.5533	1.78261	Up	0.814376	gi|598009755|ref|XP_007370858.1|	protein [Dichomitus squalens LYAD-421 SS1] >gi|395323965|gb|EJF56416.1| Prefoldin-domain-containing protein [Dichomitus squalens LYAD-421 SS1]	dsq:DICSQDRAFT_174932	Prefoldin-domain-containing protein; K04797 prefoldin alpha subunit	GO:0006457 protein folding	GO:0051082 unfolded protein binding	GO:0016272 prefoldin complex	gi|598009755|ref|XP_007370858.1|	protein [Dichomitus squalens LYAD-421 SS1] >gi|395323965|gb|EJF56416.1| Prefoldin-domain-containing protein [Dichomitus squalens LYAD-421 SS1]	dsq:DICSQDRAFT_174932	Prefoldin-domain-containing protein; K04797 prefoldin alpha subunit	GO:0006457 protein folding	GO:0051082 unfolded protein binding	GO:0016272 prefoldin complex
GL23060-G	53.3867	188.653	1.82119	Up	0.846777	gi|597992891|ref|XP_007366471.1|	protein DICSQDRAFT_87461 [Dichomitus squalens LYAD-421 SS1] >gi|395328544|gb|EJF60936.1| hypothetical protein DICSQDRAFT_87461 [Dichomitus squalens LYAD-421 SS1]	--	--	--	--	--	gi|597992891|ref|XP_007366471.1|	protein DICSQDRAFT_87461 [Dichomitus squalens LYAD-421 SS1] >gi|395328544|gb|EJF60936.1| hypothetical protein DICSQDRAFT_87461 [Dichomitus squalens LYAD-421 SS1]	--	--	--	--	--
GL23080-G	28.4167	152.123	2.42043	Up	0.913614	gi|597992643|ref|XP_007366406.1|	protein [Dichomitus squalens LYAD-421 SS1] >gi|395328479|gb|EJF60871.1| ENTH-domain-containing protein [Dichomitus squalens LYAD-421 SS1]	dsq:DICSQDRAFT_137092	ENTH-domain-containing protein; K12471 epsin	--	--	--	gi|597992643|ref|XP_007366406.1|	protein [Dichomitus squalens LYAD-421 SS1] >gi|395328479|gb|EJF60871.1| ENTH-domain-containing protein [Dichomitus squalens LYAD-421 SS1]	dsq:DICSQDRAFT_137092	ENTH-domain-containing protein; K12471 epsin	--	--	--
GL23085-G	61.3567	375.84	2.61483	Up	0.941066	gi|597998095|ref|XP_007367808.1|	A-like lectin/glucanase [Dichomitus squalens LYAD-421 SS1] >gi|395327026|gb|EJF59429.1| concanavalin A-like lectin/glucanase [Dichomitus squalens LYAD-421 SS1]	--	--	GO:0005975 carbohydrate metabolic process	GO:0004553 hydrolase activity, hydrolyzing O-glycosyl compounds | GO:0030246 carbohydrate binding	GO:0016021 integral component of membrane	gi|597998095|ref|XP_007367808.1|	A-like lectin/glucanase [Dichomitus squalens LYAD-421 SS1] >gi|395327026|gb|EJF59429.1| concanavalin A-like lectin/glucanase [Dichomitus squalens LYAD-421 SS1]	--	--	GO:0005975 carbohydrate metabolic process	GO:0004553 hydrolase activity, hydrolyzing O-glycosyl compounds | GO:0030246 carbohydrate binding	GO:0016021 integral component of membrane
GL23087-G	5.78333	36.56	2.66029	Up	0.842641	--	--	--	--	--	--	--	--	--	--	--	--	--	--
GL23124-G	8.57	50.24	2.55147	Up	0.866601	gi|636626757|ref|XP_008044513.1|	protein TRAVEDRAFT_75196 [Trametes versicolor FP-101664 SS1] >gi|392559821|gb|EIW53005.1| hypothetical protein TRAVEDRAFT_75196 [Trametes versicolor FP-101664 SS1]	--	--	--	--	--	gi|636626757|ref|XP_008044513.1|	protein TRAVEDRAFT_75196 [Trametes versicolor FP-101664 SS1] >gi|392559821|gb|EIW53005.1| hypothetical protein TRAVEDRAFT_75196 [Trametes versicolor FP-101664 SS1]	--	--	--	--	--
GL23125-G	16.1133	109.287	2.76179	Up	0.925443	gi|598009827|ref|XP_007370876.1|	protein DICSQDRAFT_141284 [Dichomitus squalens LYAD-421 SS1] >gi|395323917|gb|EJF56369.1| hypothetical protein DICSQDRAFT_141284 [Dichomitus squalens LYAD-421 SS1]	--	--	--	--	--	gi|598009827|ref|XP_007370876.1|	protein DICSQDRAFT_141284 [Dichomitus squalens LYAD-421 SS1] >gi|395323917|gb|EJF56369.1| hypothetical protein DICSQDRAFT_141284 [Dichomitus squalens LYAD-421 SS1]	--	--	--	--	--
GL23128-G	18.3433	416.387	4.5046	Up	0.98569	gi|597998099|ref|XP_007367809.1|	hydrolase family 16 protein [Dichomitus squalens LYAD-421 SS1] >gi|395327027|gb|EJF59430.1| glycoside hydrolase family 16 protein [Dichomitus squalens LYAD-421 SS1]	--	--	GO:0005975 carbohydrate metabolic process	GO:0004553 hydrolase activity, hydrolyzing O-glycosyl compounds	GO:0016021 integral component of membrane	gi|597998099|ref|XP_007367809.1|	hydrolase family 16 protein [Dichomitus squalens LYAD-421 SS1] >gi|395327027|gb|EJF59430.1| glycoside hydrolase family 16 protein [Dichomitus squalens LYAD-421 SS1]	--	--	GO:0005975 carbohydrate metabolic process	GO:0004553 hydrolase activity, hydrolyzing O-glycosyl compounds	GO:0016021 integral component of membrane
GL23141-G	6.8	37.0133	2.44444	Up	0.827885	gi|597990551|ref|XP_007365856.1|	mutase-like protein [Dichomitus squalens LYAD-421 SS1] >gi|395329022|gb|EJF61411.1| phosphoglycerate mutase-like protein [Dichomitus squalens LYAD-421 SS1]	bze:COCCADRAFT_21860	hypothetical protein; K01078 acid phosphatase [EC:3.1.3.2]	GO:0016311 dephosphorylation	GO:0003993 acid phosphatase activity	--	gi|597990551|ref|XP_007365856.1|	mutase-like protein [Dichomitus squalens LYAD-421 SS1] >gi|395329022|gb|EJF61411.1| phosphoglycerate mutase-like protein [Dichomitus squalens LYAD-421 SS1]	bze:COCCADRAFT_21860	hypothetical protein; K01078 acid phosphatase [EC:3.1.3.2]	GO:0016311 dephosphorylation	GO:0003993 acid phosphatase activity	--
GL23145-G	3.47333	74.44	4.42169	Up	0.945805	gi|597984539|ref|XP_007364307.1|	protein DICSQDRAFT_83750 [Dichomitus squalens LYAD-421 SS1] >gi|395330578|gb|EJF62961.1| hypothetical protein DICSQDRAFT_83750 [Dichomitus squalens LYAD-421 SS1]	ppl:POSPLDRAFT_99258	hypothetical protein; K16578 CLIP-associating protein 1/2	--	GO:0003677 DNA binding	--	gi|597984539|ref|XP_007364307.1|	protein DICSQDRAFT_83750 [Dichomitus squalens LYAD-421 SS1] >gi|395330578|gb|EJF62961.1| hypothetical protein DICSQDRAFT_83750 [Dichomitus squalens LYAD-421 SS1]	ppl:POSPLDRAFT_99258	hypothetical protein; K16578 CLIP-associating protein 1/2	--	GO:0003677 DNA binding	--
GL23146-G	1180.08	283.443	-2.05775	Down	0.899672	gi|597990705|ref|XP_007365896.1|	protein DICSQDRAFT_170201 [Dichomitus squalens LYAD-421 SS1] >gi|395329062|gb|EJF61451.1| hypothetical protein DICSQDRAFT_170201 [Dichomitus squalens LYAD-421 SS1]	maj:MAA_07124	Peptidase S33 tripeptidyl aminopeptidase-like protein; K08329 autophagy-related protein 17	--	--	--	gi|597990705|ref|XP_007365896.1|	protein DICSQDRAFT_170201 [Dichomitus squalens LYAD-421 SS1] >gi|395329062|gb|EJF61451.1| hypothetical protein DICSQDRAFT_170201 [Dichomitus squalens LYAD-421 SS1]	maj:MAA_07124	Peptidase S33 tripeptidyl aminopeptidase-like protein; K08329 autophagy-related protein 17	--	--	--
GL23153-G	63.23	486.813	2.94469	Up	0.958776	gi|597990761|ref|XP_007365910.1|	P450 [Dichomitus squalens LYAD-421 SS1] >gi|395329076|gb|EJF61465.1| cytochrome P450 [Dichomitus squalens LYAD-421 SS1]	aor:AOR_1_2936174	AO090005000070; O-methylsterigmatocystin oxidoreductase; K21295 multifunctional cytochrome P450 monooxygenase	GO:0055114 oxidation-reduction process	GO:0020037 heme binding | GO:0016705 oxidoreductase activity, acting on paired donors, with incorporation or reduction of molecular oxygen | GO:0004497 monooxygenase activity | GO:0005506 iron ion binding	--	gi|597990761|ref|XP_007365910.1|	P450 [Dichomitus squalens LYAD-421 SS1] >gi|395329076|gb|EJF61465.1| cytochrome P450 [Dichomitus squalens LYAD-421 SS1]	aor:AOR_1_2936174	AO090005000070; O-methylsterigmatocystin oxidoreductase; K21295 multifunctional cytochrome P450 monooxygenase	GO:0055114 oxidation-reduction process	GO:0020037 heme binding | GO:0016705 oxidoreductase activity, acting on paired donors, with incorporation or reduction of molecular oxygen | GO:0004497 monooxygenase activity | GO:0005506 iron ion binding	--
GL23194-G	80.32	283.913	1.82162	Up	0.853092	gi|597990769|ref|XP_007365912.1|	protein [Dichomitus squalens LYAD-421 SS1] >gi|395329078|gb|EJF61467.1| ras-domain-containing protein [Dichomitus squalens LYAD-421 SS1]	cci:CC1G_02026	rho small monomeric GTPase; K07975 Rho family, other	GO:0007264 small GTPase mediated signal transduction	GO:0005525 GTP binding	GO:0005622 intracellular | GO:0016020 membrane	gi|597990769|ref|XP_007365912.1|	protein [Dichomitus squalens LYAD-421 SS1] >gi|395329078|gb|EJF61467.1| ras-domain-containing protein [Dichomitus squalens LYAD-421 SS1]	cci:CC1G_02026	rho small monomeric GTPase; K07975 Rho family, other	GO:0007264 small GTPase mediated signal transduction	GO:0005525 GTP binding	GO:0005622 intracellular | GO:0016020 membrane
GL23214-G	0	21.3067	5.42447	Up	0.830353	--	--	--	--	--	--	--	--	--	--	--	--	--	--
GL23239-G	153.783	527.447	1.77813	Up	0.85321	gi|598004029|ref|XP_007369380.1|	protein DICSQDRAFT_91594 [Dichomitus squalens LYAD-421 SS1] >gi|395325461|gb|EJF57883.1| hypothetical protein DICSQDRAFT_91594 [Dichomitus squalens LYAD-421 SS1]	--	--	--	--	GO:0016020 membrane	gi|598004029|ref|XP_007369380.1|	protein DICSQDRAFT_91594 [Dichomitus squalens LYAD-421 SS1] >gi|395325461|gb|EJF57883.1| hypothetical protein DICSQDRAFT_91594 [Dichomitus squalens LYAD-421 SS1]	--	--	--	--	GO:0016020 membrane
GL23241-G	22.2733	245.49	3.46227	Up	0.967533	gi|598013055|ref|XP_007371653.1|	protein [Dichomitus squalens LYAD-421 SS1] >gi|395323102|gb|EJF55605.1| NAD(P)-binding protein [Dichomitus squalens LYAD-421 SS1]	psq:PUNSTDRAFT_55413	NAD(P)-binding protein; K11153 retinol dehydrogenase 12 [EC:1.1.1.300]	GO:0055114 oxidation-reduction process	GO:0016491 oxidoreductase activity	--	gi|598013055|ref|XP_007371653.1|	protein [Dichomitus squalens LYAD-421 SS1] >gi|395323102|gb|EJF55605.1| NAD(P)-binding protein [Dichomitus squalens LYAD-421 SS1]	psq:PUNSTDRAFT_55413	NAD(P)-binding protein; K11153 retinol dehydrogenase 12 [EC:1.1.1.300]	GO:0055114 oxidation-reduction process	GO:0016491 oxidoreductase activity	--
GL23273-G	12.08	53.3167	2.14197	Up	0.834672	gi|598004025|ref|XP_007369379.1|	phosphoribosyltransferase [Dichomitus squalens LYAD-421 SS1] >gi|395325460|gb|EJF57882.1| anthranilate phosphoribosyltransferase [Dichomitus squalens LYAD-421 SS1]	dsq:DICSQDRAFT_163198	anthranilate phosphoribosyltransferase; K00766 anthranilate phosphoribosyltransferase [EC:2.4.2.18]	--	GO:0016740 transferase activity	--	gi|598004025|ref|XP_007369379.1|	phosphoribosyltransferase [Dichomitus squalens LYAD-421 SS1] >gi|395325460|gb|EJF57882.1| anthranilate phosphoribosyltransferase [Dichomitus squalens LYAD-421 SS1]	dsq:DICSQDRAFT_163198	anthranilate phosphoribosyltransferase; K00766 anthranilate phosphoribosyltransferase [EC:2.4.2.18]	--	GO:0016740 transferase activity	--
GL23316-G	9.56667	45.2167	2.24077	Up	0.830931	gi|597988619|ref|XP_007365352.1|	and polyadenylation specific factor 5 [Dichomitus squalens LYAD-421 SS1] >gi|395329711|gb|EJF62097.1| cleavage and polyadenylation specific factor 5 [Dichomitus squalens LYAD-421 SS1]	dsq:DICSQDRAFT_105283	cleavage and polyadenylation specific factor 5; K14397 cleavage and polyadenylation specificity factor subunit 5	GO:0006378 mRNA polyadenylation	GO:0003729 mRNA binding	GO:0005849 mRNA cleavage factor complex	gi|597988619|ref|XP_007365352.1|	and polyadenylation specific factor 5 [Dichomitus squalens LYAD-421 SS1] >gi|395329711|gb|EJF62097.1| cleavage and polyadenylation specific factor 5 [Dichomitus squalens LYAD-421 SS1]	dsq:DICSQDRAFT_105283	cleavage and polyadenylation specific factor 5; K14397 cleavage and polyadenylation specificity factor subunit 5	GO:0006378 mRNA polyadenylation	GO:0003729 mRNA binding	GO:0005849 mRNA cleavage factor complex
GL23341-G	60.9067	266.297	2.12836	Up	0.8966	gi|691790503|emb|CDO73866.1|	protein BN946_scf185016.g23 [Trametes cinnabarina]	dsq:DICSQDRAFT_85642	ADP/ATP carrier receptor; K17768 mitochondrial import receptor subunit TOM70	--	--	GO:0016021 integral component of membrane	gi|691790503|emb|CDO73866.1|	protein BN946_scf185016.g23 [Trametes cinnabarina]	dsq:DICSQDRAFT_85642	ADP/ATP carrier receptor; K17768 mitochondrial import receptor subunit TOM70	--	--	GO:0016021 integral component of membrane
GL23376-G	371.583	59.1667	-2.65083	Down	0.943193	gi|597988535|ref|XP_007365331.1|	protein [Dichomitus squalens LYAD-421 SS1] >gi|395329690|gb|EJF62076.1| SE-domain-containing protein [Dichomitus squalens LYAD-421 SS1]	dsq:DICSQDRAFT_59311	SE-domain-containing protein; K00511 squalene monooxygenase [EC:1.14.14.17]	GO:0055114 oxidation-reduction process	GO:0004506 squalene monooxygenase activity | GO:0050660 flavin adenine dinucleotide binding	GO:0016021 integral component of membrane	gi|597988535|ref|XP_007365331.1|	protein [Dichomitus squalens LYAD-421 SS1] >gi|395329690|gb|EJF62076.1| SE-domain-containing protein [Dichomitus squalens LYAD-421 SS1]	dsq:DICSQDRAFT_59311	SE-domain-containing protein; K00511 squalene monooxygenase [EC:1.14.14.17]	GO:0055114 oxidation-reduction process	GO:0004506 squalene monooxygenase activity | GO:0050660 flavin adenine dinucleotide binding	GO:0016021 integral component of membrane
GL23386-G	30.23	240.157	2.98992	Up	0.95342	gi|597976435|ref|XP_007362234.1|	protein DICSQDRAFT_152743 [Dichomitus squalens LYAD-421 SS1] >gi|395333220|gb|EJF65598.1| hypothetical protein DICSQDRAFT_152743 [Dichomitus squalens LYAD-421 SS1]	--	--	--	--	--	gi|597976435|ref|XP_007362234.1|	protein DICSQDRAFT_152743 [Dichomitus squalens LYAD-421 SS1] >gi|395333220|gb|EJF65598.1| hypothetical protein DICSQDRAFT_152743 [Dichomitus squalens LYAD-421 SS1]	--	--	--	--	--
GL23388-G	8.69667	163.017	4.22841	Up	0.972023	gi|597976435|ref|XP_007362234.1|	protein DICSQDRAFT_152743 [Dichomitus squalens LYAD-421 SS1] >gi|395333220|gb|EJF65598.1| hypothetical protein DICSQDRAFT_152743 [Dichomitus squalens LYAD-421 SS1]	--	--	--	--	--	gi|597976435|ref|XP_007362234.1|	protein DICSQDRAFT_152743 [Dichomitus squalens LYAD-421 SS1] >gi|395333220|gb|EJF65598.1| hypothetical protein DICSQDRAFT_152743 [Dichomitus squalens LYAD-421 SS1]	--	--	--	--	--
GL23394-G	148.003	38.1867	-1.95449	Down	0.862347	gi|597976273|ref|XP_007362193.1|	ribosomal protein L11 [Dichomitus squalens LYAD-421 SS1] >gi|395333179|gb|EJF65557.1| 60S ribosomal protein L11 [Dichomitus squalens LYAD-421 SS1]	dsq:DICSQDRAFT_99484	60S ribosomal protein L11; K02868 large subunit ribosomal protein L11e	GO:0006412 translation	GO:0003735 structural constituent of ribosome	GO:0005840 ribosome	gi|597976273|ref|XP_007362193.1|	ribosomal protein L11 [Dichomitus squalens LYAD-421 SS1] >gi|395333179|gb|EJF65557.1| 60S ribosomal protein L11 [Dichomitus squalens LYAD-421 SS1]	dsq:DICSQDRAFT_99484	60S ribosomal protein L11; K02868 large subunit ribosomal protein L11e	GO:0006412 translation	GO:0003735 structural constituent of ribosome	GO:0005840 ribosome
GL23398-G	34.9533	126.483	1.85545	Up	0.843652	gi|597976261|ref|XP_007362190.1|	protein DICSQDRAFT_152712 [Dichomitus squalens LYAD-421 SS1] >gi|395333176|gb|EJF65554.1| hypothetical protein DICSQDRAFT_152712 [Dichomitus squalens LYAD-421 SS1]	dsq:DICSQDRAFT_152712	hypothetical protein; K21141 autophagy-related protein 27	--	--	--	gi|597976261|ref|XP_007362190.1|	protein DICSQDRAFT_152712 [Dichomitus squalens LYAD-421 SS1] >gi|395333176|gb|EJF65554.1| hypothetical protein DICSQDRAFT_152712 [Dichomitus squalens LYAD-421 SS1]	dsq:DICSQDRAFT_152712	hypothetical protein; K21141 autophagy-related protein 27	--	--	--
GL23414-G	19.94	118.917	2.57621	Up	0.918774	gi|597976419|ref|XP_007362230.1|	protein DICSQDRAFT_152741 [Dichomitus squalens LYAD-421 SS1] >gi|395333216|gb|EJF65594.1| hypothetical protein DICSQDRAFT_152741 [Dichomitus squalens LYAD-421 SS1]	--	--	--	--	--	gi|597976419|ref|XP_007362230.1|	protein DICSQDRAFT_152741 [Dichomitus squalens LYAD-421 SS1] >gi|395333216|gb|EJF65594.1| hypothetical protein DICSQDRAFT_152741 [Dichomitus squalens LYAD-421 SS1]	--	--	--	--	--
GL23419-G	64.75	252.503	1.96335	Up	0.873874	gi|597976301|ref|XP_007362200.1|	protein DICSQDRAFT_133170 [Dichomitus squalens LYAD-421 SS1] >gi|395333186|gb|EJF65564.1| hypothetical protein DICSQDRAFT_133170 [Dichomitus squalens LYAD-421 SS1]	--	--	--	--	--	gi|597976301|ref|XP_007362200.1|	protein DICSQDRAFT_133170 [Dichomitus squalens LYAD-421 SS1] >gi|395333186|gb|EJF65564.1| hypothetical protein DICSQDRAFT_133170 [Dichomitus squalens LYAD-421 SS1]	--	--	--	--	--
GL23430-G	7.85667	44.46	2.50052	Up	0.851608	gi|597999283|ref|XP_007368112.1|	protein [Dichomitus squalens LYAD-421 SS1] >gi|395326761|gb|EJF59167.1| TBC-domain-containing protein [Dichomitus squalens LYAD-421 SS1]	dsq:DICSQDRAFT_89653	TBC-domain-containing protein; K20176 small G protein signaling modulator 3	--	--	--	gi|597999283|ref|XP_007368112.1|	protein [Dichomitus squalens LYAD-421 SS1] >gi|395326761|gb|EJF59167.1| TBC-domain-containing protein [Dichomitus squalens LYAD-421 SS1]	dsq:DICSQDRAFT_89653	TBC-domain-containing protein; K20176 small G protein signaling modulator 3	--	--	--
GL23439-G	122.307	627.333	2.35873	Up	0.926795	gi|597976301|ref|XP_007362200.1|	protein DICSQDRAFT_133170 [Dichomitus squalens LYAD-421 SS1] >gi|395333186|gb|EJF65564.1| hypothetical protein DICSQDRAFT_133170 [Dichomitus squalens LYAD-421 SS1]	--	--	--	--	--	gi|597976301|ref|XP_007362200.1|	protein DICSQDRAFT_133170 [Dichomitus squalens LYAD-421 SS1] >gi|395333186|gb|EJF65564.1| hypothetical protein DICSQDRAFT_133170 [Dichomitus squalens LYAD-421 SS1]	--	--	--	--	--
GL23447-G	42.7667	7.14667	-2.58114	Down	0.8543	gi|597976293|ref|XP_007362198.1|	oxidoreductase/NADH oxidase [Dichomitus squalens LYAD-421 SS1] >gi|395333184|gb|EJF65562.1| NADH:flavin oxidoreductase/NADH oxidase [Dichomitus squalens LYAD-421 SS1]	dsq:DICSQDRAFT_133169	NADH:flavin oxidoreductase/NADH oxidase; K00354 NADPH2 dehydrogenase [EC:1.6.99.1]	--	GO:0003824 catalytic activity	--	gi|597976293|ref|XP_007362198.1|	oxidoreductase/NADH oxidase [Dichomitus squalens LYAD-421 SS1] >gi|395333184|gb|EJF65562.1| NADH:flavin oxidoreductase/NADH oxidase [Dichomitus squalens LYAD-421 SS1]	dsq:DICSQDRAFT_133169	NADH:flavin oxidoreductase/NADH oxidase; K00354 NADPH2 dehydrogenase [EC:1.6.99.1]	--	GO:0003824 catalytic activity	--
GL23454-G	30.6367	127.5	2.05717	Up	0.873559	gi|597975975|ref|XP_007362117.1|	protein DICSQDRAFT_144130 [Dichomitus squalens LYAD-421 SS1] >gi|395333103|gb|EJF65481.1| hypothetical protein DICSQDRAFT_144130 [Dichomitus squalens LYAD-421 SS1]	dsq:DICSQDRAFT_144130	hypothetical protein; K17805 mitochondrial import inner membrane translocase subunit TIM16	GO:0030150 protein import into mitochondrial matrix	--	GO:0005744 mitochondrial inner membrane presequence translocase complex	gi|597975975|ref|XP_007362117.1|	protein DICSQDRAFT_144130 [Dichomitus squalens LYAD-421 SS1] >gi|395333103|gb|EJF65481.1| hypothetical protein DICSQDRAFT_144130 [Dichomitus squalens LYAD-421 SS1]	dsq:DICSQDRAFT_144130	hypothetical protein; K17805 mitochondrial import inner membrane translocase subunit TIM16	GO:0030150 protein import into mitochondrial matrix	--	GO:0005744 mitochondrial inner membrane presequence translocase complex
GL23482-G	7.28333	54.2167	2.89607	Up	0.892648	gi|597993907|ref|XP_007366736.1|	protein DICSQDRAFT_87785 [Dichomitus squalens LYAD-421 SS1] >gi|395328203|gb|EJF60597.1| hypothetical protein DICSQDRAFT_87785 [Dichomitus squalens LYAD-421 SS1]	--	--	--	--	--	gi|597993907|ref|XP_007366736.1|	protein DICSQDRAFT_87785 [Dichomitus squalens LYAD-421 SS1] >gi|395328203|gb|EJF60597.1| hypothetical protein DICSQDRAFT_87785 [Dichomitus squalens LYAD-421 SS1]	--	--	--	--	--
GL23500-G	7.86	80.66	3.35925	Up	0.934436	--	--	--	--	--	--	--	--	--	--	--	--	--	--
GL23522-G	4.16667	32.5567	2.96599	Up	0.844952	gi|636616625|ref|XP_008039447.1|	protein TRAVEDRAFT_125896 [Trametes versicolor FP-101664 SS1] >gi|392563962|gb|EIW57140.1| hypothetical protein TRAVEDRAFT_125896 [Trametes versicolor FP-101664 SS1]	vda:VDAG_07081	lactose regulatory protein LAC9; K09241 transcriptional regulatory protein GAL4	--	--	--	gi|636616625|ref|XP_008039447.1|	protein TRAVEDRAFT_125896 [Trametes versicolor FP-101664 SS1] >gi|392563962|gb|EIW57140.1| hypothetical protein TRAVEDRAFT_125896 [Trametes versicolor FP-101664 SS1]	vda:VDAG_07081	lactose regulatory protein LAC9; K09241 transcriptional regulatory protein GAL4	--	--	--
GL23543-G	334.31	89.76	-1.89704	Down	0.868006	gi|597994031|ref|XP_007366767.1|	S-transferase C-terminal-like protein [Dichomitus squalens LYAD-421 SS1] >gi|395328234|gb|EJF60628.1| glutathione S-transferase C-terminal-like protein [Dichomitus squalens LYAD-421 SS1]	dsq:DICSQDRAFT_171068	glutathione S-transferase C-terminal-like protein; K00799 glutathione S-transferase [EC:2.5.1.18]	--	--	--	gi|597994031|ref|XP_007366767.1|	S-transferase C-terminal-like protein [Dichomitus squalens LYAD-421 SS1] >gi|395328234|gb|EJF60628.1| glutathione S-transferase C-terminal-like protein [Dichomitus squalens LYAD-421 SS1]	dsq:DICSQDRAFT_171068	glutathione S-transferase C-terminal-like protein; K00799 glutathione S-transferase [EC:2.5.1.18]	--	--	--
GL23559-G	11.9133	76.4167	2.68131	Up	0.904726	gi|597983719|ref|XP_007364099.1|	protein [Dichomitus squalens LYAD-421 SS1] >gi|395331165|gb|EJF63547.1| SRF-TF-domain-containing protein [Dichomitus squalens LYAD-421 SS1]	dsq:DICSQDRAFT_55330	SRF-TF-domain-containing protein; K12412 pheromone receptor transcription factor	GO:0006355 regulation of transcription, DNA-templated	GO:0003677 DNA binding | GO:0046983 protein dimerization activity	GO:0005634 nucleus	gi|597983719|ref|XP_007364099.1|	protein [Dichomitus squalens LYAD-421 SS1] >gi|395331165|gb|EJF63547.1| SRF-TF-domain-containing protein [Dichomitus squalens LYAD-421 SS1]	dsq:DICSQDRAFT_55330	SRF-TF-domain-containing protein; K12412 pheromone receptor transcription factor	GO:0006355 regulation of transcription, DNA-templated	GO:0003677 DNA binding | GO:0046983 protein dimerization activity	GO:0005634 nucleus
GL23563-G	26.4567	95.9167	1.85815	Up	0.832388	gi|597983699|ref|XP_007364094.1|	protein DICSQDRAFT_134999 [Dichomitus squalens LYAD-421 SS1] >gi|395331160|gb|EJF63542.1| hypothetical protein DICSQDRAFT_134999 [Dichomitus squalens LYAD-421 SS1]	--	--	--	--	--	gi|597983699|ref|XP_007364094.1|	protein DICSQDRAFT_134999 [Dichomitus squalens LYAD-421 SS1] >gi|395331160|gb|EJF63542.1| hypothetical protein DICSQDRAFT_134999 [Dichomitus squalens LYAD-421 SS1]	--	--	--	--	--
GL23565-G	14.1933	79.6633	2.4887	Up	0.89421	gi|598007183|ref|XP_007370140.1|	protease [Dichomitus squalens LYAD-421 SS1] >gi|395324652|gb|EJF57088.1| acid protease [Dichomitus squalens LYAD-421 SS1]	cci:CC1G_03281	aspartyl protease; K01379 cathepsin D [EC:3.4.23.5]	GO:0006508 proteolysis	GO:0004190 aspartic-type endopeptidase activity	GO:0016021 integral component of membrane	gi|598007183|ref|XP_007370140.1|	protease [Dichomitus squalens LYAD-421 SS1] >gi|395324652|gb|EJF57088.1| acid protease [Dichomitus squalens LYAD-421 SS1]	cci:CC1G_03281	aspartyl protease; K01379 cathepsin D [EC:3.4.23.5]	GO:0006508 proteolysis	GO:0004190 aspartic-type endopeptidase activity	GO:0016021 integral component of membrane
GL23585-G	21.5567	98.7133	2.19511	Up	0.879021	gi|598007255|ref|XP_007370159.1|	protein [Dichomitus squalens LYAD-421 SS1] >gi|395324671|gb|EJF57107.1| Cullin-domain-containing protein [Dichomitus squalens LYAD-421 SS1]	dsq:DICSQDRAFT_70162	Cullin-domain-containing protein; K03347 cullin 1	GO:0006511 ubiquitin-dependent protein catabolic process	GO:0031625 ubiquitin protein ligase binding	GO:0031461 cullin-RING ubiquitin ligase complex	gi|598007255|ref|XP_007370159.1|	protein [Dichomitus squalens LYAD-421 SS1] >gi|395324671|gb|EJF57107.1| Cullin-domain-containing protein [Dichomitus squalens LYAD-421 SS1]	dsq:DICSQDRAFT_70162	Cullin-domain-containing protein; K03347 cullin 1	GO:0006511 ubiquitin-dependent protein catabolic process	GO:0031625 ubiquitin protein ligase binding	GO:0031461 cullin-RING ubiquitin ligase complex
GL23594-G	21.6267	83.7333	1.95299	Up	0.840803	gi|597982499|ref|XP_007363786.1|	protein DICSQDRAFT_134673 [Dichomitus squalens LYAD-421 SS1] >gi|395330852|gb|EJF63234.1| hypothetical protein DICSQDRAFT_134673 [Dichomitus squalens LYAD-421 SS1]	--	--	--	--	--	gi|597982499|ref|XP_007363786.1|	protein DICSQDRAFT_134673 [Dichomitus squalens LYAD-421 SS1] >gi|395330852|gb|EJF63234.1| hypothetical protein DICSQDRAFT_134673 [Dichomitus squalens LYAD-421 SS1]	--	--	--	--	--
GL23602-G	624.38	203.813	-1.61518	Down	0.824905	gi|597983711|ref|XP_007364097.1|	protein DICSQDRAFT_42968, partial [Dichomitus squalens LYAD-421 SS1] >gi|395331163|gb|EJF63545.1| hypothetical protein DICSQDRAFT_42968, partial [Dichomitus squalens LYAD-421 SS1]	dsq:DICSQDRAFT_42968	hypothetical protein; K09554 cell division cycle protein 37	--	--	--	gi|597983711|ref|XP_007364097.1|	protein DICSQDRAFT_42968, partial [Dichomitus squalens LYAD-421 SS1] >gi|395331163|gb|EJF63545.1| hypothetical protein DICSQDRAFT_42968, partial [Dichomitus squalens LYAD-421 SS1]	dsq:DICSQDRAFT_42968	hypothetical protein; K09554 cell division cycle protein 37	--	--	--
GL23637-G	11.4633	47.42	2.04847	Up	0.814166	gi|597983531|ref|XP_007364052.1|	family enzyme [Dichomitus squalens LYAD-421 SS1] >gi|395331118|gb|EJF63500.1| CAIB/BAIF family enzyme [Dichomitus squalens LYAD-421 SS1]	dsq:DICSQDRAFT_154003	CAIB/BAIF family enzyme; K18703 succinate---hydroxymethylglutarate CoA-transferase [EC:2.8.3.13]	GO:0008152 metabolic process	GO:0003824 catalytic activity	--	gi|597983531|ref|XP_007364052.1|	family enzyme [Dichomitus squalens LYAD-421 SS1] >gi|395331118|gb|EJF63500.1| CAIB/BAIF family enzyme [Dichomitus squalens LYAD-421 SS1]	dsq:DICSQDRAFT_154003	CAIB/BAIF family enzyme; K18703 succinate---hydroxymethylglutarate CoA-transferase [EC:2.8.3.13]	GO:0008152 metabolic process	GO:0003824 catalytic activity	--
GL23665-G	24.9867	95.3633	1.93228	Up	0.842221	gi|597992285|ref|XP_007366306.1|	proteasome subunit P45 [Dichomitus squalens LYAD-421 SS1] >gi|395328695|gb|EJF61086.1| 26S proteasome subunit P45 [Dichomitus squalens LYAD-421 SS1]	dsq:DICSQDRAFT_87192	26S proteasome subunit P45; K03065 26S proteasome regulatory subunit T5	GO:0030163 protein catabolic process	GO:0016787 hydrolase activity | GO:0005524 ATP binding	GO:0005737 cytoplasm | GO:0000502 proteasome complex	gi|597992285|ref|XP_007366306.1|	proteasome subunit P45 [Dichomitus squalens LYAD-421 SS1] >gi|395328695|gb|EJF61086.1| 26S proteasome subunit P45 [Dichomitus squalens LYAD-421 SS1]	dsq:DICSQDRAFT_87192	26S proteasome subunit P45; K03065 26S proteasome regulatory subunit T5	GO:0030163 protein catabolic process	GO:0016787 hydrolase activity | GO:0005524 ATP binding	GO:0005737 cytoplasm | GO:0000502 proteasome complex
GL23671-G	8.63667	40.1233	2.21589	Up	0.816883	gi|597992243|ref|XP_007366295.1|	protein DICSQDRAFT_147520 [Dichomitus squalens LYAD-421 SS1] >gi|395328684|gb|EJF61075.1| hypothetical protein DICSQDRAFT_147520 [Dichomitus squalens LYAD-421 SS1]	--	--	--	--	--	gi|597992243|ref|XP_007366295.1|	protein DICSQDRAFT_147520 [Dichomitus squalens LYAD-421 SS1] >gi|395328684|gb|EJF61075.1| hypothetical protein DICSQDRAFT_147520 [Dichomitus squalens LYAD-421 SS1]	--	--	--	--	--
GL23680-G	37.2167	137.57	1.88615	Up	0.850702	gi|597992043|ref|XP_007366242.1|	protein DICSQDRAFT_180997 [Dichomitus squalens LYAD-421 SS1] >gi|395328631|gb|EJF61022.1| hypothetical protein DICSQDRAFT_180997 [Dichomitus squalens LYAD-421 SS1]	dsq:DICSQDRAFT_180997	hypothetical protein; K15613 homeobox protein Meis1	--	--	--	gi|597992043|ref|XP_007366242.1|	protein DICSQDRAFT_180997 [Dichomitus squalens LYAD-421 SS1] >gi|395328631|gb|EJF61022.1| hypothetical protein DICSQDRAFT_180997 [Dichomitus squalens LYAD-421 SS1]	dsq:DICSQDRAFT_180997	hypothetical protein; K15613 homeobox protein Meis1	--	--	--
GL23691-G	163.647	586.39	1.84128	Up	0.863975	gi|636613439|ref|XP_008037854.1|	protein TRAVEDRAFT_147597 [Trametes versicolor FP-101664 SS1] >gi|392566379|gb|EIW59555.1| hypothetical protein TRAVEDRAFT_147597 [Trametes versicolor FP-101664 SS1]	--	--	--	--	--	gi|636613439|ref|XP_008037854.1|	protein TRAVEDRAFT_147597 [Trametes versicolor FP-101664 SS1] >gi|392566379|gb|EIW59555.1| hypothetical protein TRAVEDRAFT_147597 [Trametes versicolor FP-101664 SS1]	--	--	--	--	--
GL23694-G	38.32	194.107	2.34068	Up	0.912354	gi|597991949|ref|XP_007366218.1|	[Dichomitus squalens LYAD-421 SS1] >gi|395328607|gb|EJF60998.1| t-SNARE [Dichomitus squalens LYAD-421 SS1]	--	--	GO:0016192 vesicle-mediated transport | GO:0006886 intracellular protein transport | GO:0061025 membrane fusion	GO:0005484 SNAP receptor activity	GO:0016021 integral component of membrane | GO:0005622 intracellular	gi|597991949|ref|XP_007366218.1|	[Dichomitus squalens LYAD-421 SS1] >gi|395328607|gb|EJF60998.1| t-SNARE [Dichomitus squalens LYAD-421 SS1]	--	--	GO:0016192 vesicle-mediated transport | GO:0006886 intracellular protein transport | GO:0061025 membrane fusion	GO:0005484 SNAP receptor activity	GO:0016021 integral component of membrane | GO:0005622 intracellular
GL23695-G	15.6433	70.3267	2.16852	Up	0.858159	gi|597980651|ref|XP_007363302.1|	protein S7 [Dichomitus squalens LYAD-421 SS1] >gi|395331203|gb|EJF63584.1| ribosomal protein S7 [Dichomitus squalens LYAD-421 SS1]	dsq:DICSQDRAFT_54784	ribosomal protein S7; K02992 small subunit ribosomal protein S7	--	--	--	gi|597980651|ref|XP_007363302.1|	protein S7 [Dichomitus squalens LYAD-421 SS1] >gi|395331203|gb|EJF63584.1| ribosomal protein S7 [Dichomitus squalens LYAD-421 SS1]	dsq:DICSQDRAFT_54784	ribosomal protein S7; K02992 small subunit ribosomal protein S7	--	--	--
GL23702-G	359.733	1508.37	2.06799	Up	0.901549	gi|597995553|ref|XP_007367156.1|	protein DICSQDRAFT_155945 [Dichomitus squalens LYAD-421 SS1] >gi|395327805|gb|EJF60202.1| hypothetical protein DICSQDRAFT_155945 [Dichomitus squalens LYAD-421 SS1]	--	--	--	--	--	gi|597995553|ref|XP_007367156.1|	protein DICSQDRAFT_155945 [Dichomitus squalens LYAD-421 SS1] >gi|395327805|gb|EJF60202.1| hypothetical protein DICSQDRAFT_155945 [Dichomitus squalens LYAD-421 SS1]	--	--	--	--	--
GL23706-G	25.65	138.91	2.43712	Up	0.912761	gi|597995629|ref|XP_007367175.1|	protein DICSQDRAFT_88404 [Dichomitus squalens LYAD-421 SS1] >gi|395327824|gb|EJF60221.1| hypothetical protein DICSQDRAFT_88404 [Dichomitus squalens LYAD-421 SS1]	--	--	--	--	GO:0016021 integral component of membrane	gi|597995629|ref|XP_007367175.1|	protein DICSQDRAFT_88404 [Dichomitus squalens LYAD-421 SS1] >gi|395327824|gb|EJF60221.1| hypothetical protein DICSQDRAFT_88404 [Dichomitus squalens LYAD-421 SS1]	--	--	--	--	GO:0016021 integral component of membrane
GL23713-G	2137.03	646.817	-1.72418	Down	0.848077	gi|597982719|ref|XP_007363844.1|	protein [Dichomitus squalens LYAD-421 SS1] >gi|395330910|gb|EJF63292.1| histone-fold-containing protein [Dichomitus squalens LYAD-421 SS1]	dsq:DICSQDRAFT_56267	histone-fold-containing protein; K11253 histone H3	--	GO:0046982 protein heterodimerization activity | GO:0003677 DNA binding	GO:0000786 nucleosome | GO:0005634 nucleus	gi|597982719|ref|XP_007363844.1|	protein [Dichomitus squalens LYAD-421 SS1] >gi|395330910|gb|EJF63292.1| histone-fold-containing protein [Dichomitus squalens LYAD-421 SS1]	dsq:DICSQDRAFT_56267	histone-fold-containing protein; K11253 histone H3	--	GO:0046982 protein heterodimerization activity | GO:0003677 DNA binding	GO:0000786 nucleosome | GO:0005634 nucleus
GL23734-G	9.23333	53.0733	2.52306	Up	0.868912	gi|1018882615|dbj|GAT50613.1|	protein [Mycena chlorophos]	dsq:DICSQDRAFT_153893	ras GEF; K03099 son of sevenless	--	--	--	gi|1018882615|dbj|GAT50613.1|	protein [Mycena chlorophos]	dsq:DICSQDRAFT_153893	ras GEF; K03099 son of sevenless	--	--	--
GL23740-G	11.0533	45.01	2.02576	Up	0.806801	gi|636612169|ref|XP_008037219.1|	lyase beta subunit [Trametes versicolor FP-101664 SS1] >gi|392566029|gb|EIW59205.1| citrate lyase beta subunit [Trametes versicolor FP-101664 SS1]	cput:CONPUDRAFT_73078	citrate lyase beta subunit; K11390 citrate lyase subunit beta-like protein [EC:4.1.-.-]	GO:0009987 cellular process	GO:0005488 binding | GO:0003824 catalytic activity	--	gi|636612169|ref|XP_008037219.1|	lyase beta subunit [Trametes versicolor FP-101664 SS1] >gi|392566029|gb|EIW59205.1| citrate lyase beta subunit [Trametes versicolor FP-101664 SS1]	cput:CONPUDRAFT_73078	citrate lyase beta subunit; K11390 citrate lyase subunit beta-like protein [EC:4.1.-.-]	GO:0009987 cellular process	GO:0005488 binding | GO:0003824 catalytic activity	--
GL23743-G	20.26	83.9067	2.05015	Up	0.854838	gi|636612553|ref|XP_008037411.1|	ATPase [Trametes versicolor FP-101664 SS1] >gi|392566327|gb|EIW59503.1| V-type ATPase [Trametes versicolor FP-101664 SS1]	dsq:DICSQDRAFT_168276	V-type ATPase; K02155 V-type H+-transporting ATPase 16kDa proteolipid subunit	GO:0015991 ATP hydrolysis coupled proton transport	GO:0015078 hydrogen ion transmembrane transporter activity	GO:0033179 proton-transporting V-type ATPase, V0 domain | GO:0016021 integral component of membrane	gi|636612553|ref|XP_008037411.1|	ATPase [Trametes versicolor FP-101664 SS1] >gi|392566327|gb|EIW59503.1| V-type ATPase [Trametes versicolor FP-101664 SS1]	dsq:DICSQDRAFT_168276	V-type ATPase; K02155 V-type H+-transporting ATPase 16kDa proteolipid subunit	GO:0015991 ATP hydrolysis coupled proton transport	GO:0015078 hydrogen ion transmembrane transporter activity	GO:0033179 proton-transporting V-type ATPase, V0 domain | GO:0016021 integral component of membrane
GL23745-G	4.36	27.64	2.66436	Up	0.807746	gi|597983207|ref|XP_007363970.1|	protein DICSQDRAFT_102671 [Dichomitus squalens LYAD-421 SS1] >gi|395331036|gb|EJF63418.1| hypothetical protein DICSQDRAFT_102671 [Dichomitus squalens LYAD-421 SS1]	wic:J056_000740	hypothetical protein; K17491 protein phosphatase 4 regulatory subunit 3	--	--	--	gi|597983207|ref|XP_007363970.1|	protein DICSQDRAFT_102671 [Dichomitus squalens LYAD-421 SS1] >gi|395331036|gb|EJF63418.1| hypothetical protein DICSQDRAFT_102671 [Dichomitus squalens LYAD-421 SS1]	wic:J056_000740	hypothetical protein; K17491 protein phosphatase 4 regulatory subunit 3	--	--	--
GL23746-G	20.73	73.3333	1.82275	Up	0.811724	gi|597983109|ref|XP_007363945.1|	protein DICSQDRAFT_55853 [Dichomitus squalens LYAD-421 SS1] >gi|395331011|gb|EJF63393.1| hypothetical protein DICSQDRAFT_55853 [Dichomitus squalens LYAD-421 SS1]	pgr:PGTG_15093	hypothetical protein; K13172 serine/arginine repetitive matrix protein 2	--	GO:0008270 zinc ion binding | GO:0003676 nucleic acid binding	--	gi|597983109|ref|XP_007363945.1|	protein DICSQDRAFT_55853 [Dichomitus squalens LYAD-421 SS1] >gi|395331011|gb|EJF63393.1| hypothetical protein DICSQDRAFT_55853 [Dichomitus squalens LYAD-421 SS1]	pgr:PGTG_15093	hypothetical protein; K13172 serine/arginine repetitive matrix protein 2	--	GO:0008270 zinc ion binding | GO:0003676 nucleic acid binding	--
GL23748-G	89.44	339.777	1.92559	Up	0.872378	gi|597983121|ref|XP_007363948.1|	domain-containing protein [Dichomitus squalens LYAD-421 SS1] >gi|395331014|gb|EJF63396.1| CRAL/TRIO domain-containing protein [Dichomitus squalens LYAD-421 SS1]	cci:CC1G_03016	SEC14 cytosolic factor; K08254 glucan endo-1,3-alpha-glucosidase [EC:3.2.1.59]	--	--	--	gi|597983121|ref|XP_007363948.1|	domain-containing protein [Dichomitus squalens LYAD-421 SS1] >gi|395331014|gb|EJF63396.1| CRAL/TRIO domain-containing protein [Dichomitus squalens LYAD-421 SS1]	cci:CC1G_03016	SEC14 cytosolic factor; K08254 glucan endo-1,3-alpha-glucosidase [EC:3.2.1.59]	--	--	--
GL23749-G	6.69333	36.85	2.46087	Up	0.829093	gi|597983125|ref|XP_007363949.1|	protein DICSQDRAFT_168282 [Dichomitus squalens LYAD-421 SS1] >gi|395331015|gb|EJF63397.1| hypothetical protein DICSQDRAFT_168282 [Dichomitus squalens LYAD-421 SS1]	--	--	--	--	--	gi|597983125|ref|XP_007363949.1|	protein DICSQDRAFT_168282 [Dichomitus squalens LYAD-421 SS1] >gi|395331015|gb|EJF63397.1| hypothetical protein DICSQDRAFT_168282 [Dichomitus squalens LYAD-421 SS1]	--	--	--	--	--
GL23755-G	157.59	707.913	2.1674	Up	0.909308	gi|636613403|ref|XP_008037836.1|	hydrolase [Trametes versicolor FP-101664 SS1] >gi|392566347|gb|EIW59523.1| Metallo-dependent hydrolase [Trametes versicolor FP-101664 SS1]	--	--	--	--	--	gi|636613403|ref|XP_008037836.1|	hydrolase [Trametes versicolor FP-101664 SS1] >gi|392566347|gb|EIW59523.1| Metallo-dependent hydrolase [Trametes versicolor FP-101664 SS1]	--	--	--	--	--
GL23764-G	60.3633	204.13	1.75774	Up	0.838572	gi|597983291|ref|XP_007363991.1|	protein DICSQDRAFT_83093 [Dichomitus squalens LYAD-421 SS1] >gi|395331057|gb|EJF63439.1| hypothetical protein DICSQDRAFT_83093 [Dichomitus squalens LYAD-421 SS1]	cci:CC1G_15003	vacuolar fusion protein MON1; K20195 vacuolar fusion protein MON1	--	--	--	gi|597983291|ref|XP_007363991.1|	protein DICSQDRAFT_83093 [Dichomitus squalens LYAD-421 SS1] >gi|395331057|gb|EJF63439.1| hypothetical protein DICSQDRAFT_83093 [Dichomitus squalens LYAD-421 SS1]	cci:CC1G_15003	vacuolar fusion protein MON1; K20195 vacuolar fusion protein MON1	--	--	--
GL23766-G	14.4	59.7433	2.05271	Up	0.833294	gi|597983315|ref|XP_007363997.1|	protein [Dichomitus squalens LYAD-421 SS1] >gi|395331063|gb|EJF63445.1| Pet127-domain-containing protein [Dichomitus squalens LYAD-421 SS1]	--	--	--	--	--	gi|597983315|ref|XP_007363997.1|	protein [Dichomitus squalens LYAD-421 SS1] >gi|395331063|gb|EJF63445.1| Pet127-domain-containing protein [Dichomitus squalens LYAD-421 SS1]	--	--	--	--	--
GL23767-G	9.88	73.75	2.90006	Up	0.913811	--	--	--	--	--	--	--	--	--	--	--	--	--	--
GL23769-G	67.98	290.737	2.09653	Up	0.894946	gi|597988299|ref|XP_007365271.1|	P450 [Dichomitus squalens LYAD-421 SS1] >gi|395329630|gb|EJF62016.1| cytochrome P450 [Dichomitus squalens LYAD-421 SS1]	bsc:COCSADRAFT_204412	hypothetical protein; K14338 cytochrome P450 / NADPH-cytochrome P450 reductase [EC:1.14.14.1 1.6.2.4]	GO:0055114 oxidation-reduction process	GO:0020037 heme binding | GO:0016705 oxidoreductase activity, acting on paired donors, with incorporation or reduction of molecular oxygen | GO:0004497 monooxygenase activity | GO:0005506 iron ion binding	--	gi|597988299|ref|XP_007365271.1|	P450 [Dichomitus squalens LYAD-421 SS1] >gi|395329630|gb|EJF62016.1| cytochrome P450 [Dichomitus squalens LYAD-421 SS1]	bsc:COCSADRAFT_204412	hypothetical protein; K14338 cytochrome P450 / NADPH-cytochrome P450 reductase [EC:1.14.14.1 1.6.2.4]	GO:0055114 oxidation-reduction process	GO:0020037 heme binding | GO:0016705 oxidoreductase activity, acting on paired donors, with incorporation or reduction of molecular oxygen | GO:0004497 monooxygenase activity | GO:0005506 iron ion binding	--
GL23770-G	43.87	5.48667	-2.99923	Down	0.878771	gi|597983395|ref|XP_007364017.1|	ribosomal protein L17/L23 [Dichomitus squalens LYAD-421 SS1] >gi|395331083|gb|EJF63465.1| 60S ribosomal protein L17/L23 [Dichomitus squalens LYAD-421 SS1]	dsq:DICSQDRAFT_102781	60S ribosomal protein L17/L23; K02880 large subunit ribosomal protein L17e	GO:0006412 translation	GO:0003735 structural constituent of ribosome	GO:0015934 large ribosomal subunit	gi|597983395|ref|XP_007364017.1|	ribosomal protein L17/L23 [Dichomitus squalens LYAD-421 SS1] >gi|395331083|gb|EJF63465.1| 60S ribosomal protein L17/L23 [Dichomitus squalens LYAD-421 SS1]	dsq:DICSQDRAFT_102781	60S ribosomal protein L17/L23; K02880 large subunit ribosomal protein L17e	GO:0006412 translation	GO:0003735 structural constituent of ribosome	GO:0015934 large ribosomal subunit
GL23776-G	11.02	51.5967	2.22715	Up	0.841749	gi|636613307|ref|XP_008037788.1|	protein TRAVEDRAFT_122666 [Trametes versicolor FP-101664 SS1] >gi|392566266|gb|EIW59442.1| hypothetical protein TRAVEDRAFT_122666 [Trametes versicolor FP-101664 SS1]	--	--	--	--	--	gi|636613307|ref|XP_008037788.1|	protein TRAVEDRAFT_122666 [Trametes versicolor FP-101664 SS1] >gi|392566266|gb|EIW59442.1| hypothetical protein TRAVEDRAFT_122666 [Trametes versicolor FP-101664 SS1]	--	--	--	--	--
GL23779-G	1946.51	7781.63	1.99918	Up	0.894328	--	--	--	--	--	--	--	--	--	--	--	--	--	--
GL23783-G	13.54	54.8667	2.0187	Up	0.822686	gi|597982523|ref|XP_007363792.1|	protein [Dichomitus squalens LYAD-421 SS1] >gi|395330858|gb|EJF63240.1| RNI-like protein [Dichomitus squalens LYAD-421 SS1]	dsq:DICSQDRAFT_125752	RNI-like protein; K14319 Ran GTPase-activating protein 1	--	--	--	gi|597982523|ref|XP_007363792.1|	protein [Dichomitus squalens LYAD-421 SS1] >gi|395330858|gb|EJF63240.1| RNI-like protein [Dichomitus squalens LYAD-421 SS1]	dsq:DICSQDRAFT_125752	RNI-like protein; K14319 Ran GTPase-activating protein 1	--	--	--
GL23789-G	39.1633	158.013	2.01247	Up	0.872693	gi|597982439|ref|XP_007363771.1|	protein DICSQDRAFT_13703, partial [Dichomitus squalens LYAD-421 SS1] >gi|395330837|gb|EJF63219.1| hypothetical protein DICSQDRAFT_13703, partial [Dichomitus squalens LYAD-421 SS1]	dsq:DICSQDRAFT_13703	hypothetical protein; K00510 heme oxygenase (biliverdin-producing) [EC:1.14.14.18]	--	--	--	gi|597982439|ref|XP_007363771.1|	protein DICSQDRAFT_13703, partial [Dichomitus squalens LYAD-421 SS1] >gi|395330837|gb|EJF63219.1| hypothetical protein DICSQDRAFT_13703, partial [Dichomitus squalens LYAD-421 SS1]	dsq:DICSQDRAFT_13703	hypothetical protein; K00510 heme oxygenase (biliverdin-producing) [EC:1.14.14.18]	--	--	--
GL23792-G	13.89	123.313	3.15021	Up	0.945569	gi|597982323|ref|XP_007363740.1|	protease [Dichomitus squalens LYAD-421 SS1] >gi|395330806|gb|EJF63188.1| acid protease [Dichomitus squalens LYAD-421 SS1]	pco:PHACADRAFT_212233	hypothetical protein; K01379 cathepsin D [EC:3.4.23.5]	GO:0006508 proteolysis	GO:0004190 aspartic-type endopeptidase activity	--	gi|597982323|ref|XP_007363740.1|	protease [Dichomitus squalens LYAD-421 SS1] >gi|395330806|gb|EJF63188.1| acid protease [Dichomitus squalens LYAD-421 SS1]	pco:PHACADRAFT_212233	hypothetical protein; K01379 cathepsin D [EC:3.4.23.5]	GO:0006508 proteolysis	GO:0004190 aspartic-type endopeptidase activity	--
GL23794-G	24.0233	80.44	1.74348	Up	0.804424	gi|597982361|ref|XP_007363750.1|	repeat-like protein [Dichomitus squalens LYAD-421 SS1] >gi|395330816|gb|EJF63198.1| WD40 repeat-like protein [Dichomitus squalens LYAD-421 SS1]	dsq:DICSQDRAFT_102271	WD40 repeat-like protein; K03246 translation initiation factor 3 subunit I	GO:0001731 formation of translation preinitiation complex | GO:0006446 regulation of translational initiation	GO:0003743 translation initiation factor activity	GO:0016282 eukaryotic 43S preinitiation complex | GO:0005852 eukaryotic translation initiation factor 3 complex | GO:0033290 eukaryotic 48S preinitiation complex	gi|597982361|ref|XP_007363750.1|	repeat-like protein [Dichomitus squalens LYAD-421 SS1] >gi|395330816|gb|EJF63198.1| WD40 repeat-like protein [Dichomitus squalens LYAD-421 SS1]	dsq:DICSQDRAFT_102271	WD40 repeat-like protein; K03246 translation initiation factor 3 subunit I	GO:0001731 formation of translation preinitiation complex | GO:0006446 regulation of translational initiation	GO:0003743 translation initiation factor activity	GO:0016282 eukaryotic 43S preinitiation complex | GO:0005852 eukaryotic translation initiation factor 3 complex | GO:0033290 eukaryotic 48S preinitiation complex
GL23798-G	5.76667	38.1067	2.72423	Up	0.850414	gi|597982407|ref|XP_007363762.1|	protein DICSQDRAFT_82666 [Dichomitus squalens LYAD-421 SS1] >gi|395330828|gb|EJF63210.1| hypothetical protein DICSQDRAFT_82666 [Dichomitus squalens LYAD-421 SS1]	--	--	--	--	--	gi|597982407|ref|XP_007363762.1|	protein DICSQDRAFT_82666 [Dichomitus squalens LYAD-421 SS1] >gi|395330828|gb|EJF63210.1| hypothetical protein DICSQDRAFT_82666 [Dichomitus squalens LYAD-421 SS1]	--	--	--	--	--
GL23807-G	22.1767	82.2633	1.89121	Up	0.830248	gi|598010195|ref|XP_007370966.1|	protein DICSQDRAFT_175031 [Dichomitus squalens LYAD-421 SS1] >gi|395323838|gb|EJF56293.1| hypothetical protein DICSQDRAFT_175031 [Dichomitus squalens LYAD-421 SS1]	erc:Ecym_2087	hypothetical protein; K17411 small subunit ribosomal protein S33	--	--	--	gi|598010195|ref|XP_007370966.1|	protein DICSQDRAFT_175031 [Dichomitus squalens LYAD-421 SS1] >gi|395323838|gb|EJF56293.1| hypothetical protein DICSQDRAFT_175031 [Dichomitus squalens LYAD-421 SS1]	erc:Ecym_2087	hypothetical protein; K17411 small subunit ribosomal protein S33	--	--	--
GL23810-G	11.3633	56.3733	2.31063	Up	0.856243	gi|598010191|ref|XP_007370965.1|	containing nucleoside triphosphate hydrolase protein [Dichomitus squalens LYAD-421 SS1] >gi|395323837|gb|EJF56292.1| P-loop containing nucleoside triphosphate hydrolase protein [Dichomitus squalens LYAD-421 SS1]	dsq:DICSQDRAFT_157955	P-loop containing nucleoside triphosphate hydrolase protein; K17675 ATP-dependent RNA helicase SUPV3L1/SUV3 [EC:3.6.4.13]	GO:0008152 metabolic process	GO:0016817 hydrolase activity, acting on acid anhydrides	--	gi|598010191|ref|XP_007370965.1|	containing nucleoside triphosphate hydrolase protein [Dichomitus squalens LYAD-421 SS1] >gi|395323837|gb|EJF56292.1| P-loop containing nucleoside triphosphate hydrolase protein [Dichomitus squalens LYAD-421 SS1]	dsq:DICSQDRAFT_157955	P-loop containing nucleoside triphosphate hydrolase protein; K17675 ATP-dependent RNA helicase SUPV3L1/SUV3 [EC:3.6.4.13]	GO:0008152 metabolic process	GO:0016817 hydrolase activity, acting on acid anhydrides	--
GL23820-G	33.34	235.667	2.82142	Up	0.946488	gi|597995491|ref|XP_007367140.1|	protein DICSQDRAFT_107912 [Dichomitus squalens LYAD-421 SS1] >gi|395327789|gb|EJF60186.1| hypothetical protein DICSQDRAFT_107912 [Dichomitus squalens LYAD-421 SS1]	bor:COCMIDRAFT_40123	glycoside hydrolase family 16 protein; K00767 nicotinate-nucleotide pyrophosphorylase (carboxylating) [EC:2.4.2.19]	GO:0005975 carbohydrate metabolic process	GO:0004553 hydrolase activity, hydrolyzing O-glycosyl compounds	GO:0016021 integral component of membrane	gi|597995491|ref|XP_007367140.1|	protein DICSQDRAFT_107912 [Dichomitus squalens LYAD-421 SS1] >gi|395327789|gb|EJF60186.1| hypothetical protein DICSQDRAFT_107912 [Dichomitus squalens LYAD-421 SS1]	bor:COCMIDRAFT_40123	glycoside hydrolase family 16 protein; K00767 nicotinate-nucleotide pyrophosphorylase (carboxylating) [EC:2.4.2.19]	GO:0005975 carbohydrate metabolic process	GO:0004553 hydrolase activity, hydrolyzing O-glycosyl compounds	GO:0016021 integral component of membrane
GL23825-G	54.1867	205.84	1.92551	Up	0.865524	gi|597982779|ref|XP_007363860.1|	protein DICSQDRAFT_160513 [Dichomitus squalens LYAD-421 SS1] >gi|395330926|gb|EJF63308.1| hypothetical protein DICSQDRAFT_160513 [Dichomitus squalens LYAD-421 SS1]	--	--	--	--	--	gi|597982779|ref|XP_007363860.1|	protein DICSQDRAFT_160513 [Dichomitus squalens LYAD-421 SS1] >gi|395330926|gb|EJF63308.1| hypothetical protein DICSQDRAFT_160513 [Dichomitus squalens LYAD-421 SS1]	--	--	--	--	--
GL23832-G	16.3167	64.4933	1.9828	Up	0.828883	gi|597982813|ref|XP_007363870.1|	ergosterol biosynthesis protein [Dichomitus squalens LYAD-421 SS1] >gi|395330936|gb|EJF63318.1| ERG4/ERG24 ergosterol biosynthesis protein [Dichomitus squalens LYAD-421 SS1]	dsq:DICSQDRAFT_179308	ERG4/ERG24 ergosterol biosynthesis protein; K00222 Delta14-sterol reductase [EC:1.3.1.70]	GO:0055114 oxidation-reduction process	GO:0016628 oxidoreductase activity, acting on the CH-CH group of donors, NAD or NADP as acceptor	GO:0016021 integral component of membrane	gi|597982813|ref|XP_007363870.1|	ergosterol biosynthesis protein [Dichomitus squalens LYAD-421 SS1] >gi|395330936|gb|EJF63318.1| ERG4/ERG24 ergosterol biosynthesis protein [Dichomitus squalens LYAD-421 SS1]	dsq:DICSQDRAFT_179308	ERG4/ERG24 ergosterol biosynthesis protein; K00222 Delta14-sterol reductase [EC:1.3.1.70]	GO:0055114 oxidation-reduction process	GO:0016628 oxidoreductase activity, acting on the CH-CH group of donors, NAD or NADP as acceptor	GO:0016021 integral component of membrane
GL23835-G	232.99	787.083	1.75625	Up	0.852304	gi|597983067|ref|XP_007363935.1|	protein [Dichomitus squalens LYAD-421 SS1] >gi|395331001|gb|EJF63383.1| AhpC-TSA-domain-containing protein [Dichomitus squalens LYAD-421 SS1]	sla:SERLADRAFT_469644	hypothetical protein; K03564 peroxiredoxin Q/BCP [EC:1.11.1.15]	GO:0055114 oxidation-reduction process | GO:0098869 cellular oxidant detoxification	GO:0016491 oxidoreductase activity | GO:0016209 antioxidant activity	--	gi|597983067|ref|XP_007363935.1|	protein [Dichomitus squalens LYAD-421 SS1] >gi|395331001|gb|EJF63383.1| AhpC-TSA-domain-containing protein [Dichomitus squalens LYAD-421 SS1]	sla:SERLADRAFT_469644	hypothetical protein; K03564 peroxiredoxin Q/BCP [EC:1.11.1.15]	GO:0055114 oxidation-reduction process | GO:0098869 cellular oxidant detoxification	GO:0016491 oxidoreductase activity | GO:0016209 antioxidant activity	--
GL23842-G	8.94667	44.67	2.31988	Up	0.837521	gi|597983259|ref|XP_007363983.1|	protein ral2 [Dichomitus squalens LYAD-421 SS1] >gi|395331049|gb|EJF63431.1| regulatory protein ral2 [Dichomitus squalens LYAD-421 SS1]	--	--	--	--	--	gi|597983259|ref|XP_007363983.1|	protein ral2 [Dichomitus squalens LYAD-421 SS1] >gi|395331049|gb|EJF63431.1| regulatory protein ral2 [Dichomitus squalens LYAD-421 SS1]	--	--	--	--	--
GL23843-G	8.75333	42.0467	2.26409	Up	0.825666	gi|597983315|ref|XP_007363997.1|	protein [Dichomitus squalens LYAD-421 SS1] >gi|395331063|gb|EJF63445.1| Pet127-domain-containing protein [Dichomitus squalens LYAD-421 SS1]	--	--	--	--	--	gi|597983315|ref|XP_007363997.1|	protein [Dichomitus squalens LYAD-421 SS1] >gi|395331063|gb|EJF63445.1| Pet127-domain-containing protein [Dichomitus squalens LYAD-421 SS1]	--	--	--	--	--
GL23865-G	8.54333	74.72	3.12862	Up	0.923316	gi|636612947|ref|XP_008037608.1|	protein TRAVEDRAFT_122036 [Trametes versicolor FP-101664 SS1] >gi|392565942|gb|EIW59118.1| hypothetical protein TRAVEDRAFT_122036 [Trametes versicolor FP-101664 SS1]	--	--	--	--	--	gi|636612947|ref|XP_008037608.1|	protein TRAVEDRAFT_122036 [Trametes versicolor FP-101664 SS1] >gi|392565942|gb|EIW59118.1| hypothetical protein TRAVEDRAFT_122036 [Trametes versicolor FP-101664 SS1]	--	--	--	--	--
GL23869-G	20.7767	85.1533	2.0351	Up	0.8543	gi|597982319|ref|XP_007363739.1|	protein DICSQDRAFT_56304 [Dichomitus squalens LYAD-421 SS1] >gi|395330805|gb|EJF63187.1| hypothetical protein DICSQDRAFT_56304 [Dichomitus squalens LYAD-421 SS1]	--	--	--	--	--	gi|597982319|ref|XP_007363739.1|	protein DICSQDRAFT_56304 [Dichomitus squalens LYAD-421 SS1] >gi|395330805|gb|EJF63187.1| hypothetical protein DICSQDRAFT_56304 [Dichomitus squalens LYAD-421 SS1]	--	--	--	--	--
GL23871-G	13.3467	60.9467	2.19107	Up	0.850689	gi|636612999|ref|XP_008037634.1|	protein TRAVEDRAFT_122112 [Trametes versicolor FP-101664 SS1] >gi|392565977|gb|EIW59153.1| hypothetical protein TRAVEDRAFT_122112 [Trametes versicolor FP-101664 SS1]	pco:PHACADRAFT_194936	hypothetical protein; K05658 ATP-binding cassette, subfamily B (MDR/TAP), member 1 [EC:3.6.3.44]	--	--	--	gi|636612999|ref|XP_008037634.1|	protein TRAVEDRAFT_122112 [Trametes versicolor FP-101664 SS1] >gi|392565977|gb|EIW59153.1| hypothetical protein TRAVEDRAFT_122112 [Trametes versicolor FP-101664 SS1]	pco:PHACADRAFT_194936	hypothetical protein; K05658 ATP-binding cassette, subfamily B (MDR/TAP), member 1 [EC:3.6.3.44]	--	--	--
GL23872-G	2.32667	24.26	3.38224	Up	0.821636	gi|597982425|ref|XP_007363767.1|	protein DICSQDRAFT_102306 [Dichomitus squalens LYAD-421 SS1] >gi|395330833|gb|EJF63215.1| hypothetical protein DICSQDRAFT_102306 [Dichomitus squalens LYAD-421 SS1]	--	--	--	--	--	gi|597982425|ref|XP_007363767.1|	protein DICSQDRAFT_102306 [Dichomitus squalens LYAD-421 SS1] >gi|395330833|gb|EJF63215.1| hypothetical protein DICSQDRAFT_102306 [Dichomitus squalens LYAD-421 SS1]	--	--	--	--	--
GL23901-G	16.7733	83.7433	2.3198	Up	0.882985	gi|636619581|ref|XP_008040925.1|	protein TRAVEDRAFT_30313 [Trametes versicolor FP-101664 SS1] >gi|392562282|gb|EIW55462.1| hypothetical protein TRAVEDRAFT_30313 [Trametes versicolor FP-101664 SS1]	--	--	--	--	--	gi|636619581|ref|XP_008040925.1|	protein TRAVEDRAFT_30313 [Trametes versicolor FP-101664 SS1] >gi|392562282|gb|EIW55462.1| hypothetical protein TRAVEDRAFT_30313 [Trametes versicolor FP-101664 SS1]	--	--	--	--	--
GL23916-G	27.61	148.127	2.42357	Up	0.913024	gi|691787523|emb|CDO76001.1|	protein BN946_scf184780.g8 [Trametes cinnabarina]	cci:CC1G_01603	palmitoyltransferase AKR1; K20032 palmitoyltransferase ZDHHC13/17 [EC:2.3.1.225]	--	GO:0046872 metal ion binding | GO:0016746 transferase activity, transferring acyl groups	GO:0016020 membrane	gi|691787523|emb|CDO76001.1|	protein BN946_scf184780.g8 [Trametes cinnabarina]	cci:CC1G_01603	palmitoyltransferase AKR1; K20032 palmitoyltransferase ZDHHC13/17 [EC:2.3.1.225]	--	GO:0046872 metal ion binding | GO:0016746 transferase activity, transferring acyl groups	GO:0016020 membrane
GL23920-G	3577.16	888.703	-2.00904	Down	0.895116	gi|597995521|ref|XP_007367148.1|	protein DICSQDRAFT_155938 [Dichomitus squalens LYAD-421 SS1] >gi|395327797|gb|EJF60194.1| hypothetical protein DICSQDRAFT_155938 [Dichomitus squalens LYAD-421 SS1]	--	--	--	--	--	gi|597995521|ref|XP_007367148.1|	protein DICSQDRAFT_155938 [Dichomitus squalens LYAD-421 SS1] >gi|395327797|gb|EJF60194.1| hypothetical protein DICSQDRAFT_155938 [Dichomitus squalens LYAD-421 SS1]	--	--	--	--	--
GL23923-G	34.7633	123.57	1.82969	Up	0.83718	gi|597982723|ref|XP_007363845.1|	protein [Dichomitus squalens LYAD-421 SS1] >gi|395330911|gb|EJF63293.1| DAO-domain-containing protein [Dichomitus squalens LYAD-421 SS1]	dsq:DICSQDRAFT_168177	DAO-domain-containing protein; K00111 glycerol-3-phosphate dehydrogenase [EC:1.1.5.3]	GO:0006072 glycerol-3-phosphate metabolic process | GO:0055114 oxidation-reduction process	GO:0052591 sn-glycerol-3-phosphate:ubiquinone-8 oxidoreductase activity	GO:0016021 integral component of membrane | GO:0009331 glycerol-3-phosphate dehydrogenase complex	gi|597982723|ref|XP_007363845.1|	protein [Dichomitus squalens LYAD-421 SS1] >gi|395330911|gb|EJF63293.1| DAO-domain-containing protein [Dichomitus squalens LYAD-421 SS1]	dsq:DICSQDRAFT_168177	DAO-domain-containing protein; K00111 glycerol-3-phosphate dehydrogenase [EC:1.1.5.3]	GO:0006072 glycerol-3-phosphate metabolic process | GO:0055114 oxidation-reduction process	GO:0052591 sn-glycerol-3-phosphate:ubiquinone-8 oxidoreductase activity	GO:0016021 integral component of membrane | GO:0009331 glycerol-3-phosphate dehydrogenase complex
GL23962-G	862.3	200.02	-2.10805	Down	0.904188	gi|597983243|ref|XP_007363979.1|	oxidase [Dichomitus squalens LYAD-421 SS1] >gi|395331045|gb|EJF63427.1| alternative oxidase [Dichomitus squalens LYAD-421 SS1]	--	--	--	GO:0016491 oxidoreductase activity	GO:0044425 membrane part	gi|597983243|ref|XP_007363979.1|	oxidase [Dichomitus squalens LYAD-421 SS1] >gi|395331045|gb|EJF63427.1| alternative oxidase [Dichomitus squalens LYAD-421 SS1]	--	--	--	GO:0016491 oxidoreductase activity	GO:0044425 membrane part
GL23963-G	15.3767	80.9433	2.39617	Up	0.888014	gi|597983247|ref|XP_007363980.1|	protein DICSQDRAFT_102702 [Dichomitus squalens LYAD-421 SS1] >gi|395331046|gb|EJF63428.1| hypothetical protein DICSQDRAFT_102702 [Dichomitus squalens LYAD-421 SS1]	--	--	--	--	--	gi|597983247|ref|XP_007363980.1|	protein DICSQDRAFT_102702 [Dichomitus squalens LYAD-421 SS1] >gi|395331046|gb|EJF63428.1| hypothetical protein DICSQDRAFT_102702 [Dichomitus squalens LYAD-421 SS1]	--	--	--	--	--
GL23966-G	0	31.2167	5.96424	Up	0.882552	--	--	--	--	--	--	--	--	--	--	--	--	--	--
GL23968-G	7.02	56.4133	3.00649	Up	0.900053	gi|597983367|ref|XP_007364010.1|	protein DICSQDRAFT_102769 [Dichomitus squalens LYAD-421 SS1] >gi|395331076|gb|EJF63458.1| hypothetical protein DICSQDRAFT_102769 [Dichomitus squalens LYAD-421 SS1]	bcom:BAUCODRAFT_34152	hypothetical protein; K16944 septin 7	--	--	--	gi|597983367|ref|XP_007364010.1|	protein DICSQDRAFT_102769 [Dichomitus squalens LYAD-421 SS1] >gi|395331076|gb|EJF63458.1| hypothetical protein DICSQDRAFT_102769 [Dichomitus squalens LYAD-421 SS1]	bcom:BAUCODRAFT_34152	hypothetical protein; K16944 septin 7	--	--	--
GL23971-G	112.143	29.4367	-1.92966	Down	0.849337	gi|598000571|ref|XP_007368460.1|	protein DICSQDRAFT_172635 [Dichomitus squalens LYAD-421 SS1] >gi|395326401|gb|EJF58811.1| hypothetical protein DICSQDRAFT_172635 [Dichomitus squalens LYAD-421 SS1]	--	--	--	--	--	gi|598000571|ref|XP_007368460.1|	protein DICSQDRAFT_172635 [Dichomitus squalens LYAD-421 SS1] >gi|395326401|gb|EJF58811.1| hypothetical protein DICSQDRAFT_172635 [Dichomitus squalens LYAD-421 SS1]	--	--	--	--	--
GL24015-G	7.19667	66.44	3.20665	Up	0.919575	gi|691791990|emb|CDO72657.1|	protein BN946_scf184985.g76 [Trametes cinnabarina]	--	--	--	--	--	gi|691791990|emb|CDO72657.1|	protein BN946_scf184985.g76 [Trametes cinnabarina]	--	--	--	--	--
GL24035-G	4.19667	38.4767	3.19667	Up	0.873297	gi|597981597|ref|XP_007363546.1|	protein DICSQDRAFT_179068 [Dichomitus squalens LYAD-421 SS1] >gi|395331447|gb|EJF63828.1| hypothetical protein DICSQDRAFT_179068 [Dichomitus squalens LYAD-421 SS1]	pbn:PADG_11605	PADG_03462, PADG_03463; NADPH-cytochrome P450 reductase; K00327 NADPH-ferrihemoprotein reductase [EC:1.6.2.4]	--	--	--	gi|597981597|ref|XP_007363546.1|	protein DICSQDRAFT_179068 [Dichomitus squalens LYAD-421 SS1] >gi|395331447|gb|EJF63828.1| hypothetical protein DICSQDRAFT_179068 [Dichomitus squalens LYAD-421 SS1]	pbn:PADG_11605	PADG_03462, PADG_03463; NADPH-cytochrome P450 reductase; K00327 NADPH-ferrihemoprotein reductase [EC:1.6.2.4]	--	--	--
GL24049-G	4.59	37.5	3.03032	Up	0.8637	gi|597981709|ref|XP_007363576.1|	protein DICSQDRAFT_153679 [Dichomitus squalens LYAD-421 SS1] >gi|395331477|gb|EJF63858.1| hypothetical protein DICSQDRAFT_153679 [Dichomitus squalens LYAD-421 SS1]	lel:LELG_03995	hypothetical protein; K14443 protein Tob/BTG	--	--	--	gi|597981709|ref|XP_007363576.1|	protein DICSQDRAFT_153679 [Dichomitus squalens LYAD-421 SS1] >gi|395331477|gb|EJF63858.1| hypothetical protein DICSQDRAFT_153679 [Dichomitus squalens LYAD-421 SS1]	lel:LELG_03995	hypothetical protein; K14443 protein Tob/BTG	--	--	--
GL24051-G	5.01333	29.9233	2.57743	Up	0.813247	gi|597981689|ref|XP_007363571.1|	mutase-like protein [Dichomitus squalens LYAD-421 SS1] >gi|395331472|gb|EJF63853.1| phosphoglycerate mutase-like protein [Dichomitus squalens LYAD-421 SS1]	scm:SCHCODRAFT_59683	hypothetical protein; K01078 acid phosphatase [EC:3.1.3.2]	--	--	--	gi|597981689|ref|XP_007363571.1|	mutase-like protein [Dichomitus squalens LYAD-421 SS1] >gi|395331472|gb|EJF63853.1| phosphoglycerate mutase-like protein [Dichomitus squalens LYAD-421 SS1]	scm:SCHCODRAFT_59683	hypothetical protein; K01078 acid phosphatase [EC:3.1.3.2]	--	--	--
GL24052-G	19	97.12	2.35377	Up	0.892385	gi|691788316|emb|CDO75432.1|	protein BN946_scf184693.g1 [Trametes cinnabarina]	--	--	--	--	--	gi|691788316|emb|CDO75432.1|	protein BN946_scf184693.g1 [Trametes cinnabarina]	--	--	--	--	--
GL24055-G	13.69	58.9333	2.10596	Up	0.839491	gi|597981799|ref|XP_007363600.1|	protein [Dichomitus squalens LYAD-421 SS1] >gi|395331501|gb|EJF63882.1| chaps-domain-containing protein [Dichomitus squalens LYAD-421 SS1]	dsq:DICSQDRAFT_160374	chaps-domain-containing protein; K19881 Chs5-Arf1p-binding protein BUD7/BCH1	--	--	--	gi|597981799|ref|XP_007363600.1|	protein [Dichomitus squalens LYAD-421 SS1] >gi|395331501|gb|EJF63882.1| chaps-domain-containing protein [Dichomitus squalens LYAD-421 SS1]	dsq:DICSQDRAFT_160374	chaps-domain-containing protein; K19881 Chs5-Arf1p-binding protein BUD7/BCH1	--	--	--
GL24073-G	6.96667	39.7167	2.5112	Up	0.840646	gi|691784400|emb|CDO78005.1|	protein BN946_scf184664.g2 [Trametes cinnabarina]	--	--	--	--	--	gi|691784400|emb|CDO78005.1|	protein BN946_scf184664.g2 [Trametes cinnabarina]	--	--	--	--	--
GL24074-G	9.68667	42.5067	2.13362	Up	0.813247	gi|597981643|ref|XP_007363558.1|	protein [Dichomitus squalens LYAD-421 SS1] >gi|395331459|gb|EJF63840.1| Mov34-domain-containing protein [Dichomitus squalens LYAD-421 SS1]	dsq:DICSQDRAFT_101929	Mov34-domain-containing protein; K09613 COP9 signalosome complex subunit 5 [EC:3.4.-.-]	--	--	--	gi|597981643|ref|XP_007363558.1|	protein [Dichomitus squalens LYAD-421 SS1] >gi|395331459|gb|EJF63840.1| Mov34-domain-containing protein [Dichomitus squalens LYAD-421 SS1]	dsq:DICSQDRAFT_101929	Mov34-domain-containing protein; K09613 COP9 signalosome complex subunit 5 [EC:3.4.-.-]	--	--	--
GL24102-G	4.01333	30.02	2.90305	Up	0.832099	gi|597981679|ref|XP_007363568.1|	protein DICSQDRAFT_160351 [Dichomitus squalens LYAD-421 SS1] >gi|395331469|gb|EJF63850.1| hypothetical protein DICSQDRAFT_160351 [Dichomitus squalens LYAD-421 SS1]	nhe:NECHADRAFT_80796	hypothetical protein; K11968 ariadne-1 [EC:2.3.2.27]	--	--	--	gi|597981679|ref|XP_007363568.1|	protein DICSQDRAFT_160351 [Dichomitus squalens LYAD-421 SS1] >gi|395331469|gb|EJF63850.1| hypothetical protein DICSQDRAFT_160351 [Dichomitus squalens LYAD-421 SS1]	nhe:NECHADRAFT_80796	hypothetical protein; K11968 ariadne-1 [EC:2.3.2.27]	--	--	--
GL24111-G	19.1633	92.7667	2.27526	Up	0.883642	gi|597981753|ref|XP_007363587.1|	protein DICSQDRAFT_134470 [Dichomitus squalens LYAD-421 SS1] >gi|395331488|gb|EJF63869.1| hypothetical protein DICSQDRAFT_134470 [Dichomitus squalens LYAD-421 SS1]	dsq:DICSQDRAFT_134470	hypothetical protein; K20465 oxysterol-binding protein-related protein 9/10/11	--	--	--	gi|597981753|ref|XP_007363587.1|	protein DICSQDRAFT_134470 [Dichomitus squalens LYAD-421 SS1] >gi|395331488|gb|EJF63869.1| hypothetical protein DICSQDRAFT_134470 [Dichomitus squalens LYAD-421 SS1]	dsq:DICSQDRAFT_134470	hypothetical protein; K20465 oxysterol-binding protein-related protein 9/10/11	--	--	--
GL24114-G	6.19333	44.2833	2.83798	Up	0.872968	gi|597981851|ref|XP_007363613.1|	delta(4)-desaturase [Dichomitus squalens LYAD-421 SS1] >gi|395331514|gb|EJF63895.1| dihydroceramide delta(4)-desaturase [Dichomitus squalens LYAD-421 SS1]	dsq:DICSQDRAFT_153709	dihydroceramide delta(4)-desaturase; K04712 sphingolipid Delta-4 desaturase [EC:1.14.-.-]	GO:0030148 sphingolipid biosynthetic process | GO:0055114 oxidation-reduction process	GO:0042284 sphingolipid delta-4 desaturase activity	GO:0016021 integral component of membrane	gi|597981851|ref|XP_007363613.1|	delta(4)-desaturase [Dichomitus squalens LYAD-421 SS1] >gi|395331514|gb|EJF63895.1| dihydroceramide delta(4)-desaturase [Dichomitus squalens LYAD-421 SS1]	dsq:DICSQDRAFT_153709	dihydroceramide delta(4)-desaturase; K04712 sphingolipid Delta-4 desaturase [EC:1.14.-.-]	GO:0030148 sphingolipid biosynthetic process | GO:0055114 oxidation-reduction process	GO:0042284 sphingolipid delta-4 desaturase activity	GO:0016021 integral component of membrane
GL24137-G	5.61333	59.4333	3.40434	Up	0.917658	gi|598001371|ref|XP_007368662.1|	initiation factor IIF beta subunit [Dichomitus squalens LYAD-421 SS1] >gi|395326223|gb|EJF58635.1| transcription initiation factor IIF beta subunit [Dichomitus squalens LYAD-421 SS1]	dsq:DICSQDRAFT_172831	transcription initiation factor IIF beta subunit; K03139 transcription initiation factor TFIIF subunit beta [EC:3.6.4.12]	GO:0006413 translational initiation | GO:0006367 transcription initiation from RNA polymerase II promoter	GO:0003743 translation initiation factor activity | GO:0003824 catalytic activity	GO:0005674 transcription factor TFIIF complex	gi|598001371|ref|XP_007368662.1|	initiation factor IIF beta subunit [Dichomitus squalens LYAD-421 SS1] >gi|395326223|gb|EJF58635.1| transcription initiation factor IIF beta subunit [Dichomitus squalens LYAD-421 SS1]	dsq:DICSQDRAFT_172831	transcription initiation factor IIF beta subunit; K03139 transcription initiation factor TFIIF subunit beta [EC:3.6.4.12]	GO:0006413 translational initiation | GO:0006367 transcription initiation from RNA polymerase II promoter	GO:0003743 translation initiation factor activity | GO:0003824 catalytic activity	GO:0005674 transcription factor TFIIF complex
GL24152-G	16.9	63.7267	1.91487	Up	0.817015	gi|597977879|ref|XP_007362602.1|	protein [Dichomitus squalens LYAD-421 SS1] >gi|395332427|gb|EJF64806.1| SPX-domain-containing protein [Dichomitus squalens LYAD-421 SS1]	pbn:PADG_11664	PADG_03794, PADG_03795, PADG_03796; hypothetical protein; K02212 DNA replication licensing factor MCM4 [EC:3.6.4.12]	--	--	GO:0016021 integral component of membrane	gi|597977879|ref|XP_007362602.1|	protein [Dichomitus squalens LYAD-421 SS1] >gi|395332427|gb|EJF64806.1| SPX-domain-containing protein [Dichomitus squalens LYAD-421 SS1]	pbn:PADG_11664	PADG_03794, PADG_03795, PADG_03796; hypothetical protein; K02212 DNA replication licensing factor MCM4 [EC:3.6.4.12]	--	--	GO:0016021 integral component of membrane
GL24155-G	7.37	47.42	2.68576	Up	0.87033	gi|597977831|ref|XP_007362590.1|	protein DICSQDRAFT_80493 [Dichomitus squalens LYAD-421 SS1] >gi|395332415|gb|EJF64794.1| hypothetical protein DICSQDRAFT_80493 [Dichomitus squalens LYAD-421 SS1]	--	--	--	--	GO:0016020 membrane	gi|597977831|ref|XP_007362590.1|	protein DICSQDRAFT_80493 [Dichomitus squalens LYAD-421 SS1] >gi|395332415|gb|EJF64794.1| hypothetical protein DICSQDRAFT_80493 [Dichomitus squalens LYAD-421 SS1]	--	--	--	--	GO:0016020 membrane
GL24157-G	31.01	176.31	2.50731	Up	0.923408	gi|636616785|ref|XP_008039527.1|	protein TRAVEDRAFT_149589, partial [Trametes versicolor FP-101664 SS1] >gi|392564113|gb|EIW57291.1| hypothetical protein TRAVEDRAFT_149589, partial [Trametes versicolor FP-101664 SS1]	--	--	--	--	GO:0016020 membrane	gi|636616785|ref|XP_008039527.1|	protein TRAVEDRAFT_149589, partial [Trametes versicolor FP-101664 SS1] >gi|392564113|gb|EIW57291.1| hypothetical protein TRAVEDRAFT_149589, partial [Trametes versicolor FP-101664 SS1]	--	--	--	--	GO:0016020 membrane
GL24169-G	27.37	129.333	2.24043	Up	0.893567	gi|597977795|ref|XP_007362581.1|	protein [Dichomitus squalens LYAD-421 SS1] >gi|395332406|gb|EJF64785.1| PH-domain-containing protein [Dichomitus squalens LYAD-421 SS1]	scm:SCHCODRAFT_49369	glycosyltransferase family 1 protein; K05841 sterol 3beta-glucosyltransferase [EC:2.4.1.173]	--	--	--	gi|597977795|ref|XP_007362581.1|	protein [Dichomitus squalens LYAD-421 SS1] >gi|395332406|gb|EJF64785.1| PH-domain-containing protein [Dichomitus squalens LYAD-421 SS1]	scm:SCHCODRAFT_49369	glycosyltransferase family 1 protein; K05841 sterol 3beta-glucosyltransferase [EC:2.4.1.173]	--	--	--
GL24170-G	24113.1	7361.51	-1.71174	Down	0.848405	gi|597977807|ref|XP_007362584.1|	protein [Dichomitus squalens LYAD-421 SS1] >gi|395332409|gb|EJF64788.1| DnaJ-domain-containing protein [Dichomitus squalens LYAD-421 SS1]	dsq:DICSQDRAFT_133500	DnaJ-domain-containing protein; K09510 DnaJ homolog subfamily B member 4	GO:0006457 protein folding	GO:0051082 unfolded protein binding	--	gi|597977807|ref|XP_007362584.1|	protein [Dichomitus squalens LYAD-421 SS1] >gi|395332409|gb|EJF64788.1| DnaJ-domain-containing protein [Dichomitus squalens LYAD-421 SS1]	dsq:DICSQDRAFT_133500	DnaJ-domain-containing protein; K09510 DnaJ homolog subfamily B member 4	GO:0006457 protein folding	GO:0051082 unfolded protein binding	--
GL24195-G	13.5367	56.92	2.07206	Up	0.832467	gi|636608985|ref|XP_008035627.1|	synthase-like protein [Trametes versicolor FP-101664 SS1] >gi|392568615|gb|EIW61789.1| Clavaminate synthase-like protein [Trametes versicolor FP-101664 SS1]	dsq:DICSQDRAFT_103145	Clavaminate synthase-like protein; K15601 lysine-specific demethylase 3 [EC:1.14.11.-]	--	--	--	gi|636608985|ref|XP_008035627.1|	synthase-like protein [Trametes versicolor FP-101664 SS1] >gi|392568615|gb|EIW61789.1| Clavaminate synthase-like protein [Trametes versicolor FP-101664 SS1]	dsq:DICSQDRAFT_103145	Clavaminate synthase-like protein; K15601 lysine-specific demethylase 3 [EC:1.14.11.-]	--	--	--
GL24204-G	49.0067	183.45	1.90434	Up	0.859183	gi|597999225|ref|XP_007368097.1|	dehydrogenase cytochrome b560 subunit [Dichomitus squalens LYAD-421 SS1] >gi|395326746|gb|EJF59152.1| succinate dehydrogenase cytochrome b560 subunit [Dichomitus squalens LYAD-421 SS1]	dsq:DICSQDRAFT_109141	succinate dehydrogenase cytochrome b560 subunit; K00236 succinate dehydrogenase (ubiquinone) cytochrome b560 subunit	GO:0006099 tricarboxylic acid cycle	GO:0000104 succinate dehydrogenase activity | GO:0009055 electron carrier activity	GO:0045281 succinate dehydrogenase complex | GO:0016021 integral component of membrane	gi|597999225|ref|XP_007368097.1|	dehydrogenase cytochrome b560 subunit [Dichomitus squalens LYAD-421 SS1] >gi|395326746|gb|EJF59152.1| succinate dehydrogenase cytochrome b560 subunit [Dichomitus squalens LYAD-421 SS1]	dsq:DICSQDRAFT_109141	succinate dehydrogenase cytochrome b560 subunit; K00236 succinate dehydrogenase (ubiquinone) cytochrome b560 subunit	GO:0006099 tricarboxylic acid cycle	GO:0000104 succinate dehydrogenase activity | GO:0009055 electron carrier activity	GO:0045281 succinate dehydrogenase complex | GO:0016021 integral component of membrane
GL24205-G	6.94667	33.7367	2.27992	Up	0.803348	gi|597999197|ref|XP_007368090.1|	symporter [Dichomitus squalens LYAD-421 SS1] >gi|395326739|gb|EJF59145.1| Sodium/sulfate symporter [Dichomitus squalens LYAD-421 SS1]	dsq:DICSQDRAFT_172294	Sodium/sulfate symporter; K14430 phosphate transporter	GO:0006814 sodium ion transport | GO:0055085 transmembrane transport	GO:0005215 transporter activity	GO:0016021 integral component of membrane	gi|597999197|ref|XP_007368090.1|	symporter [Dichomitus squalens LYAD-421 SS1] >gi|395326739|gb|EJF59145.1| Sodium/sulfate symporter [Dichomitus squalens LYAD-421 SS1]	dsq:DICSQDRAFT_172294	Sodium/sulfate symporter; K14430 phosphate transporter	GO:0006814 sodium ion transport | GO:0055085 transmembrane transport	GO:0005215 transporter activity	GO:0016021 integral component of membrane
GL24214-G	6.85333	34.1233	2.31588	Up	0.808599	gi|597999369|ref|XP_007368136.1|	protein DICSQDRAFT_182122 [Dichomitus squalens LYAD-421 SS1] >gi|395326785|gb|EJF59191.1| hypothetical protein DICSQDRAFT_182122 [Dichomitus squalens LYAD-421 SS1]	cput:CONPUDRAFT_71012	hypothetical protein; K15168 mediator of RNA polymerase II transcription subunit 25	--	--	--	gi|597999369|ref|XP_007368136.1|	protein DICSQDRAFT_182122 [Dichomitus squalens LYAD-421 SS1] >gi|395326785|gb|EJF59191.1| hypothetical protein DICSQDRAFT_182122 [Dichomitus squalens LYAD-421 SS1]	cput:CONPUDRAFT_71012	hypothetical protein; K15168 mediator of RNA polymerase II transcription subunit 25	--	--	--
[truncated: 655 more rows]

## Sheet: 300 μΜ group
Supplementary table 2. Differentially expressed genes in G. lucidum in response to MeJA induction (300 μΜ group).
GeneID	Means-CK	Means-300	log2FC(300/Control)	Up-Down-Regulation(300/CK)	Probability	NR-ID	NR-Annot	KEGG-ID	KEGG-Annot	GO-BP	GO-CC	GO-MF	NR-ID	NR-Annot	KEGG-ID	KEGG-Annot	GO-BP	GO-CC	GO-MF
[truncated: 2,447 more rows]
