# Supplementary material for: Transcriptome profiling of transcription factors in Ganoderma lucidum in response to methyl jasmonate
Source: Frontiers journal article supplement (doi:10.3389/fmicb.2022.1052377), 2022-11-24
Supplement: Table_3.XLS [file Table_3.XLS]

## Sheet: Sheet1
Supplementary table 3. The relative expression level of significantly expressed TFs in mycelia, primordia and fruiting body.
GeneID	Family	Mycelium	Primordia	Fruiting_bodies	Corrcorrelation analysis	300 μΜ group / Control	200 μΜ group / Control	Conserved Protein Domain
GL15197	C2H2	15.7819	1.76486	1.35588	-0.966886	-1.8996	–	C2H2
GL15336	Fungal	15.1466	20.4133	17.8027	0.959536	1.8977	–	fungal_TF_MHR
GL15667	Fungal	35.5567	38.5906	79.0888	0.345609	2.3909	–	fungal_TF_MHR
GL15940	PHD	20.3233	16.6703	21.7877	-0.457554	1.6152	–	PHD_UBR7
GL16023	C2H2	0.492247	2.7122	1.55822	0.951316	–	3.8894	zf-C2H2
GL16094	HMG	44.1633	66.3858	51.7422	0.89068	1.7823	2.2219	HMG_box
GL16402	HTH	38.636	32.1348	55.84	0.0218302	–	2.7569	HSF_DNA-bind
GL16750	GATA	30.2175	14.1681	6.85853	-0.855637	–	2.1552	ZnF_GATA superfamily
GL16934	SET	14.4	19.6	25.7763	0.692195	2.8384	–	SET
GL17608	bZIP	152.163	70.5986	77.7279	-0.988139	1.6757	–	bZIP_Zip1
GL17614	HTH	43.8565	62.5335	62.6134	0.972079	1.7287	2.0037	eIF-3c_N superfamily
GL18813	Fungal	164.224	87.3571	86.1882	-0.969837	–	2.3706	fungal_TF_MHR
GL19424	C2H2	43.5938	125.262	65.5408	0.851798	2.5704	–	zf-H2C2_2
GL19431	Homeodomain	6.7862	56.7828	42.0266	0.998309	2.0866	–	HTH_Tnp_Tc5
GL19443	Zn(II)2Cys6	116.85	185.23	75.8398	0.367786	2.1209	–	GAL4
GL19576	Homeodomain	6.72175	4.56688	2.96817	-0.782935	3.2647	3.6935	HTH_Tnp_IS630 superfamily
GL19938	C2H2	13.6238	24.0881	41.998	0.616016	–	2.2904	zf-LYAR
GL20017	C2H2	117.043	38.4189	10.1969	-0.881927	2.8934	-	zf-C2H2
GL20165	Homeodomain	88.0685	99.2797	70.8359	0.111315	2.4631	2.991	Homeodomain
GL20172	C2H2	49.7454	58.4351	58.8657	0.962421	1.8872	2.2012	zf-C2H2_2
GL20176	CCAAT	16.0279	52.7321	51.7841	0.977925	3.1475	–	CBFB_NFYA
GL20413	TFII_related	31.2392	34.1036	40.1093	0.57479	1.946	–	TFIID-31 kDa
GL20418	SET	38.6098	44.8817	38.9709	0.722946	2.3254	–	SET
GL20434	Other	13.6113	64.1486	21.9112	0.789808	2.84	–	Mediator complex subunit MED14
GL20520	TFII_related	70.7066	67.0622	70.1299	-0.786114	2.6426	–	Zn-ribbon_RPB9
GL20710	HLH	17.3403	43.2858	42.9587	0.97542	3.0759	3.1227	HLH
GL20958	Zinc_DHHC	43.3641	69.0896	37.4276	0.547582	2.3468	–	zf-DHHC
GL21012	bZIP	194.488	111.253	78.971	-0.87401	1.6501	1.9259	bZIP
GL21225	HMG	67.9131	73.8704	64.3308	0.367133	-2.63	-1.8689	HMGB-UBF_HMG-box
GL21306	SET	15.1911	22.0151	19.9549	0.997852	1.9935	–	SET
GL21326	Zn(II)2Cys6	9.11381	20.6594	7.37738	0.594153	-2.7482	–	GAL4
GL21384	Homeodomain	20.5743	28.5678	24.0199	0.93237	2.2688	–	SANT_TRF
GL21641	PHD	32.9849	43.8303	34.5092	0.775143	2.6467	2.4118	PHD_SF superfamily
GL21705	TFII_related	62.0422	108.378	90.1806	0.986055	2.3301	2.4443	TAF10
GL21755	C2H2	108.235	12.0139	6.26581	-0.960122	3.3011	–	zf-H2C2_2
GL22304	TFII_related	36.6259	61.9445	77.1249	0.817794	1.8811	2.5694	TFIIA_gamma_N superfamily
GL22307	Other	24.6742	44.781	50.3913	0.903844	1.928	–	zinc-finger
GL22438	SET	14.9469	128.438	166.06	0.889463	2.1253	3.2534	SET
GL22465	Homeodomainr	100.64	55.245	32.5564	-0.843763	2.2227	–	HemeO superfamily
GL22568	TEA	18.4613	133.449	7.86769	0.62929	–	2.8523	TEA superfamily
GL22646	HMG	212.664	109.418	169.766	-0.925779	1.5211	1.7517	HMG
GL23145	HTH	5.64929	61.4363	39.543	0.986109	3.6566	4.4217	Heat shock transcription factor
GL23522	Fungal	8.32332	4.94256	4.02676	-0.906064	–	2.966	fungal_TF_MHR
GL23559	MADS	155.126	620.441	279.004	0.850379	2.4939	2.6813	MADS_SRF_like
GL23585	HTH	102.76	187.298	180.842	0.986499	1.8819	2.1951	Cullin family
GL23680	Homeodomain	251.032	269.154	185.858	-0.0819984	2.6833	1.8861	Homeobox_KN
GL24137	TFII_related	34.7293	44.4548	34.4635	0.669413	3.5462	3.4043	TFIIF_beta
GL24471	TFII_related	26.8487	33.1516	34.6085	0.916835	1.8866	–	TAFII55_N
GL24528	C2H2	60.2847	66.0583	58.2088	0.478299	1.5655	2.2308	zf-C2H2
GL24621	F-box-like	11.0824	17.767	14.8993	0.978315	3.3122	–	F-box-like
GL24744	HTH	16.4218	39.5628	45.108	0.914549	2.959	–	HSF_DNA-bind
GL24776	TFII_related	17.9141	48.7711	32.013	0.942705	2.8954	–	Elongin_A superfamily
GL24821	Other	31.9587	38.7899	44.4636	0.762665	1.8285	–	WD40 superfamily
GL25252	HLH	69.3211	22.9774	16.6551	-0.941643	1.7739	–	PAS
GL25259	SNF2	54.8337	34.6507	29.3236	-0.907956	4.3254	3.178	SNF2_N superfamily
GL25270	C2H2	12.9499	21.8938	24.7511	0.892766	1.6942	–	zf-U1 superfamily
GL25456	GCN5	38.4598	26.5642	33.1558	-0.938393	2.0791	2.1072	COG5076
GL25628	Fungal	599.685	110.386	73.7504	-0.956632	–	–1.5649	fungal_TF_MHR
GL25655	Zn(II)2Cys6	27.2821	56.1291	15.368	0.451602	2.5075	3.14	GAL4
GL25876	GATA	27.3889	28.3608	34.2847	0.408672	3.0177	–	ZnF_GATA
GL25947	bZIP	128.952	67.7433	45.7241	-0.88171	2.7421	1.9627	bZIP_u3
GL26097	C2H2	133.256	138.874	57.2283	-0.226807	1.5395	1.882	SFP1 superfamily
GL26106	TFII_related	26.9646	32.6744	33.9666	0.918135	2.5611	–	TFIIS
GL26472	HTH	48.1414	441.353	308.488	0.994451	4.0193	4.7498	HSF_DNA-bind
GL26649	bZIP	90.8816	199.105	85.1245	0.653287	2.8952	1.8844	bZIP_ATF1
GL26980	PHD	344.524	23.4033	17.3009	-0.969044	-1.8593	–	FYVE_like_SF superfamily
GL27036	Fungal	64.2437	26.3577	55.3654	-0.832009	1.5433	–	fungal_TF_MHR
GL27308	MADS	12.8432	32.8033	48.4705	0.772957	2.3669	2.5947	MADS_MEF2_like
GL28074	GATA	180.167	353.507	174.183	0.664917	2.5492	2.9603	ZnF_GATA
GL28195	bZIP	1139.38	787.295	331.543	-0.674346	1.3977	1.8246	bZIP_GCN4
GL28219	Zn(II)2Cys6	74.9656	160.098	54.3525	0.541192	4.1834	3.2121	GAL4
GL28308	Fungal	43.1972	17.1189	19.403	-0.988165	3.4518	2.2939	fungal_TF_MHR
GL28641	TFII_related	21.7992	34.0715	35.8586	0.939311	2.2739	–	TAF4
GL28706	Other	29.9191	56.2199	31.477	0.723996	2.3694	–	DUF1752 Fungal protein of unknown function (DUF1752)
GL28816	C2H2	125.7	56.8702	56.6827	-0.972393	2.2518	2.421	zf-H2C2_2
GL29212	Fungal	25.1847	35.0134	47.0053	0.686641	–	2.2969	fungal_TF_MHR
GL29244	PHD/SET	51.8116	22.1724	22.6092	-0.97583	-1.391	–	PHD_MLL5
GL29276	CCAAT	71.5511	70.072	71.3899	-0.755396	–	1.7907	BUR6 superfamily
GL29293	C2H2	28.2116	94.8808	59.0927	0.945098	–	1.9736	zf-C2H2
GL29327	C2H2	70.5609	51.9804	66.5545	-0.820958	1.4611	–	zf-H2C2_2
GL29497	PHD	25.9243	38.3239	30.4777	0.903655	1.8561	2.7044	ING superfamily
GL29539	C2H2	11.8793	28.3914	76.331	0.513803	4.051	3.6267	zf-H2C2_2
GL29758	HLH	18.6329	41.0839	50.0057	0.871399	2.0899	2.0367	HLH
GL29983	Zinc_MIZ	27.9464	60.4204	42.8682	0.943696	2.4728	2.3364	zf-MIZ
GL30164	TFII_related	60.8486	78.4423	83.7473	0.897686	-1.9746	–	TIP120
GL30199	C2H2	402.884	409.352	518.28	0.333801	1.523	2.1199	zf-C2H2
GL30231	HTH	51.2895	96.6219	137.978	0.744983	–	2.1165	CSN8_PSD8_EIF3K superfamily
GL30615	HTH	24.0462	68.2393	75.4597	0.934753	2.8078	–	RPN5 superfamily
GL30684	HLH	63.1661	157.7	200.681	0.855848	2.832	2.5304	HLH
GL30722	TFII_related	12.8248	23.0961	18.88	0.982487	2.0479	–	DUF3591/TAFI
GL30744	Zinc_DHHC	38.1172	60.4711	74.348	0.812428	3.2516	–	zf-DHHC
GL30843	bZIP	97.6735	121.66	83.2315	0.366822	1.5449	–	bZIP_YAP
GL30889	HMG	5.37345	4.09603	4.87172	-0.915669	-1.8258	–	HMG-box superfamily
GL30910	sgf11	24.4837	25.3456	18.0685	-0.180834	2.4105	–	Sgf11
GL31004	Other	23.8103	40.2883	32.6438	0.969209	2.6749	–	Sin3_corepress superfamily
GL31143	GATA	324.193	226.065	93.3868	-0.665245	2.4658	–	ZnF_GATA
GL31152	TFII_related	25.6448	43.1518	41.1488	0.991761	1.7534	2.3833	TAF13
GL31164	GCN5	13.6557	36.9215	55.5482	0.769387	1.7717	–	RimI
GL31187	HMG	64.5558	413.169	197.436	0.910296	3.579	3.7979	NHP6B superfamily
GL31312	TFII_related	33.5969	43.7393	44.5705	0.95497	2.2076	–	TFIIFa superfamily
GL31314	HTH	266.197	249.257	250.998	-0.99027	2.2641	–	RFX_DNA_binding
GL31381	TFII_related	120.527	141.399	168.758	0.671725	1.8846	–	SUA7/TFIIB
GL31612	PHD	42.7051	27.256	22.062	-0.888172	2.069	–	FYVE
